# Supplementary material for: Lewis acid-catalyzed tandem cyclization of in situ generated o-quinone methides and arylsulfonyl hydrazides for a one-pot entry to 3-sulfonylbenzofurans
Source: Royal Society of Chemistry journal article supplement (doi:10.1039/c9qo01196j), 2019-01-01

# SUPPORTING INFORMATION

## **Lewis Acid-Catalyzed Tandem Cyclization of *in Situ* Generated *o*-Quinone Methides and Arylsulfonyl Hydrazides for a One-Pot Entry to 3-Sulfonylbenzofurans**

Fan-Xiao Meng,<sup>a</sup> Ruo-Nan Wang,<sup>a</sup> Hong-Li Huang,<sup>a</sup> Shu-Wen Gong,<sup>a</sup> Qian-Li Li,<sup>a</sup> Shao-Liang Zhang,<sup>a</sup> Chun-Lin Ma,<sup>a</sup> Chen-Zhong Li,<sup>b</sup> and Ji-Yuan Du<sup>\*a</sup>

<sup>a</sup>College of Chemistry and Chemical Engineering, Liaocheng University, Liaocheng, Shandong 252059, China

<sup>b</sup>Nanobioengineering/Bioelectronics Laboratory, Department of Biomedical Engineering, Florida International University, Miami, USA

## **Contents**

|                                                                                                            |           |
|------------------------------------------------------------------------------------------------------------|-----------|
| <b>General.....</b>                                                                                        | <b>2</b>  |
| <b>1. Optimization of the Reaction Conditions.....</b>                                                     | <b>3</b>  |
| <b>2. General Procedure for the Synthesis of <i>o</i>-hydroxyl-benzyl alcohol (<i>o</i>-HBAs) .....</b>    | <b>4</b>  |
| <b>3. General Procedure for the Synthesis of Arylsulfonyl Hydrazides .....</b>                             | <b>5</b>  |
| <b>4. General Procedure for the Synthesis of 3-Sulfonylbenzofurans .....</b>                               | <b>6</b>  |
| <b>5. General Procedure for the Synthesis of Functionalized derivatives 5, 6 and 7. ....</b>               | <b>27</b> |
| <b>6. Relative Configuration Assignment of 3aa, 4aa, and 4ha' by X-Ray Crystallographic Analysis .....</b> | <b>29</b> |
| <b>7. References .....</b>                                                                                 | <b>33</b> |
| <b>8. Copies of NMR Spectra .....</b>                                                                      | <b>33</b> |

## General

All moisture or oxygen-sensitive reactions were carried out under an argon atmosphere in oven flasks. The solvents used were purified by distillation over the drying agents indicated and were transferred under argon: THF (Na), CH<sub>2</sub>Cl<sub>2</sub> (CaH<sub>2</sub>), EtOAc (Na), toluene (Na), ClCH<sub>2</sub>CH<sub>2</sub>Cl (CaH<sub>2</sub>). The products were purified by flash column chromatography on silica gel (200-300 meshes) from the Anhui Liangchen Silicon Material Company in China.

<sup>1</sup>H NMR and <sup>13</sup>C NMR spectra were recorded in CDCl<sub>3</sub> on a Varian 500 MHz instrument. Chemical shifts were denoted in ppm ( $\delta$ ), and calibrated by using residual undeuterated solvent (CDCl<sub>3</sub> (7.27 ppm), DMSO-d<sub>6</sub> (2.50 ppm) or tetramethylsilane (0.00 ppm)) as internal reference for <sup>1</sup>H NMR and the deuterated solvent (CDCl<sub>3</sub> (77.00 ppm), DMSO-d<sub>6</sub> (39.51 ppm) or tetramethylsilane (0.00 ppm)) as internal standard for <sup>13</sup>C NMR. The following abbreviations were used to explain the multiplicities: s = singlet, d = doublet, t = triplet, q = quartet, br = broad, td = triple doublet, dt = double triplet, m = multiplet. The MS data were obtained with ESI technique, and the relative intensity (%) is given in brackets. High-resolution mass spectral analysis (HRMS) data were measured on a Bruker ApexII mass spectrometer by means of the ESI technique. The IR spectra were recorded on Nicolet Nexus 670 FT-IR spectrometer. The X-ray single-crystal determination was performed on a Bruker Smart 1000 CCD X-ray single crystal diffractometer.

## 1. Optimization of the Reaction Conditions.

A mixture of **1a** (44.8 mg, 0.20 mmol) and **2a** (44.64 mg, 0.24 mmol) was dissolved in solvent (2.0 mL), to the solution was added **Cat.1** (0.04 mmol) at 0 °C, after 0.5 h, the temperature recovered to 25 °C. Until **1a** was consumed, the **Cat.2** (0.04 mmol) and base (0.4 mmol) were successively for the indicated time. The solvent was removed and purified by flash column chromatography on silica gel to give the product **4aa**.

**Table 1. Optimization of the Reaction Conditions<sup>a</sup>**

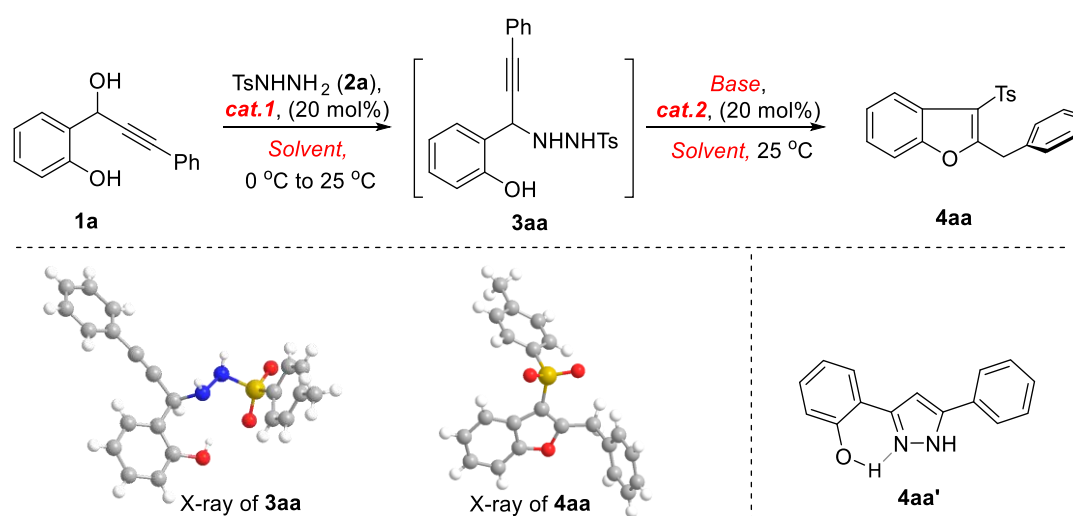

| Entry | Cat.1                                | Cat.2 | Base                            | Solvent           | Time (h) | Yield (%) <sup>b</sup> |
|-------|--------------------------------------|-------|---------------------------------|-------------------|----------|------------------------|
|       |                                      |       |                                 |                   |          | 4aa/3aa/4aa'           |
| 1     | TsOH·H <sub>2</sub> O                | -     | -                               | CHCl <sub>3</sub> | 3.5      | 0/80/0                 |
| 2     | (±) CSA                              | -     | -                               | CHCl <sub>3</sub> | 2.5      | 0/85/0                 |
| 3     | FeCl <sub>3</sub> ·6H <sub>2</sub> O | -     | -                               | CHCl <sub>3</sub> | 2        | - <sup>c</sup>         |
| 4     | AlCl <sub>3</sub>                    | -     | -                               | CHCl <sub>3</sub> | 2        | - <sup>c</sup>         |
| 5     | AgOTf                                | -     | -                               | CHCl <sub>3</sub> | 2        | - <sup>c</sup>         |
| 6     | Sc(OTf) <sub>3</sub>                 | -     | -                               | CHCl <sub>3</sub> | 2        | - <sup>c</sup>         |
| 7     | BF <sub>3</sub> ·Et <sub>2</sub> O   | -     | -                               | CHCl <sub>3</sub> | 2        | 0/99/0                 |
| 8     | BF <sub>3</sub> ·Et <sub>2</sub> O   | -     | K <sub>2</sub> CO <sub>3</sub>  | CHCl <sub>3</sub> | 8        | 50/0/0                 |
| 9     | BF <sub>3</sub> ·Et <sub>2</sub> O   | -     | Na <sub>2</sub> CO <sub>3</sub> | CHCl <sub>3</sub> | 14       | 42/0/0                 |

|    |                                    |                   |                                |                    |     |         |
|----|------------------------------------|-------------------|--------------------------------|--------------------|-----|---------|
| 10 | BF <sub>3</sub> ·Et <sub>2</sub> O | -                 | K <sub>3</sub> PO <sub>4</sub> | CHCl <sub>3</sub>  | 5   | 35/0/0  |
| 11 | BF <sub>3</sub> ·Et <sub>2</sub> O | -                 | DBU                            | CHCl <sub>3</sub>  | 6   | 45/0/0  |
| 12 | BF <sub>3</sub> ·Et <sub>2</sub> O | -                 | DMAP                           | CHCl <sub>3</sub>  | 6   | 20/0/0  |
| 13 | BF <sub>3</sub> ·Et <sub>2</sub> O | -                 | Et <sub>3</sub> N              | CHCl <sub>3</sub>  | 24  | 0/99/0  |
| 14 | BF <sub>3</sub> ·Et <sub>2</sub> O | -                 | K <sub>2</sub> CO <sub>3</sub> | CH <sub>3</sub> CN | 8   | 60/0/0  |
| 15 | BF <sub>3</sub> ·Et <sub>2</sub> O | Cu <sub>2</sub> O | K <sub>2</sub> CO <sub>3</sub> | CH <sub>3</sub> CN | 3   | 60/0/15 |
| 16 | BF <sub>3</sub> ·Et <sub>2</sub> O | CuI               | K <sub>2</sub> CO <sub>3</sub> | CH <sub>3</sub> CN | 4   | 33/0/26 |
| 17 | BF <sub>3</sub> ·Et <sub>2</sub> O | CuCl              | K <sub>2</sub> CO <sub>3</sub> | CH <sub>3</sub> CN | 7   | 55/0/25 |
| 18 | BF <sub>3</sub> ·Et <sub>2</sub> O | Ag <sub>2</sub> O | K <sub>2</sub> CO <sub>3</sub> | CH <sub>3</sub> CN | 4.5 | 78/0/5  |
| 19 | BF <sub>3</sub> ·Et <sub>2</sub> O | AgNO <sub>3</sub> | K <sub>2</sub> CO <sub>3</sub> | CH <sub>3</sub> CN | 8   | 62/0/19 |
| 20 | BF <sub>3</sub> ·Et <sub>2</sub> O | AgOAc             | K <sub>2</sub> CO <sub>3</sub> | CH <sub>3</sub> CN | 8   | 58/0/16 |
| 21 | BF <sub>3</sub> ·Et <sub>2</sub> O | Ag <sub>2</sub> O | K <sub>2</sub> CO <sub>3</sub> | toluene            | 5   | 36/0/0  |
| 22 | BF <sub>3</sub> ·Et <sub>2</sub> O | Ag <sub>2</sub> O | K <sub>2</sub> CO <sub>3</sub> | DCE                | 3   | 54/0/0  |
| 23 | BF <sub>3</sub> ·Et <sub>2</sub> O | Ag <sub>2</sub> O | K <sub>2</sub> CO <sub>3</sub> | THF                | 3   | 35/0/0  |
| 24 | BF <sub>3</sub> ·Et <sub>2</sub> O | Ag <sub>2</sub> O | K <sub>2</sub> CO <sub>3</sub> | DCM                | 3   | 23/0/0  |
| 25 | BF <sub>3</sub> ·Et <sub>2</sub> O | Ag <sub>2</sub> O | K <sub>2</sub> CO <sub>3</sub> | DMF                | 21  | 0/0/0   |
| 26 | BF <sub>3</sub> ·Et <sub>2</sub> O | Ag <sub>2</sub> O | K <sub>2</sub> CO <sub>3</sub> | 1,4-dioxane        | 3   | 50/0/0  |
| 27 | BF <sub>3</sub> ·Et <sub>2</sub> O | Ag <sub>2</sub> O | K <sub>2</sub> CO <sub>3</sub> | chlorobenzene      | 3   | 46/0/0  |

<sup>a</sup>Unless otherwise noted, the reactions were performed with **1a** (0.20 mmol), **2a** (0.24 mmol), **cat.1** (20 mol%), in solvent (2.0 mL) at 25 °C until **1a** was consumed; and then base (0.40 mmol) and **cat. 2** (20 mol%) were added to the resulting mixture and stirred at 25 °C for the indicated time. <sup>b</sup>Yield of isolated product. <sup>c</sup>Only unidentified byproducts were obtained. (±) CSA = camphorsulfonic acid.

## 2. General Procedure for the Synthesis of *o*-hydroxyl-benzyl alcohol (*o*-HBAs)

Compounds *o*-hydroxyl-benzyl alcohol (*o*-HBAs) **1a-1o** were prepared according to the reported literature.<sup>1</sup> General synthesis of *o*-HBAs are shown below.

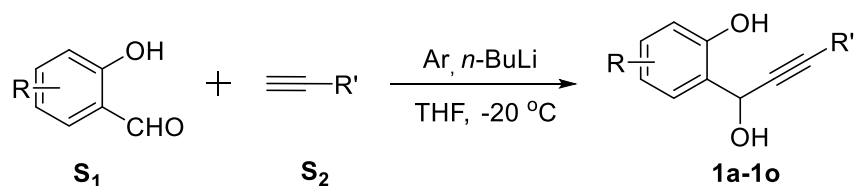

To the solution of **S<sub>2</sub>** (2.2 mmol) in dry THF (10 mL) was slowly added *n*-BuLi (2.1 mmol, 2.5 M in THF) at  $-20\text{ }^{\circ}\text{C}$  under argon. The reaction mixture was stirred at this temperature for 1 h, then a solution of the corresponding salicylaldehyde **S<sub>1</sub>** (1 mmol in 4 mL of THF) was added dropwise via cannula slowly. The reaction mixture was stirred at  $-20\text{ }^{\circ}\text{C}$  for another 0.5 h until the disappearance of the starting material. Then the reaction mixture was quenched by the addition of saturated  $\text{NH}_4\text{Cl}$ . The aqueous phase was extracted with EtOAc. Combined organic layers were washed with brine, dried over  $\text{Na}_2\text{SO}_4$  and evaporated. Crude products **1a-1o** were purified by column chromatography [gradient eluent: petroleum ether/EtOAc].

### 3. General Procedure for the Synthesis of Arylsulfonyl Hydrazides

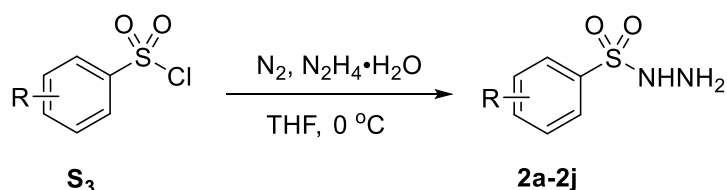

Arylsulfonyl hydrazides **2a-2i** were prepared according to the literature procedure.<sup>2</sup> Hydrazine monohydrate (250 mg, 5.0 mmol) was added dropwise to a solution of an arylsulfonyl chloride (2.0 mmol) in tetrahydrofuran (10 mL) under nitrogen at  $0\text{ }^{\circ}\text{C}$ . During the addition the mixture became brown and a white precipitate of hydrazine hydrochloride was deposited. The mixture was stirred at  $0\text{ }^{\circ}\text{C}$  for 30 min, added ethyl acetate (60 mL), and washed with saturated brine (3 x 10 mL). The organic layer was dried over sodium sulfate, filtered, and added slowly to stirred hexane (12 mL) over 5 min. After being stirred for 10 min, the mixture was filtered, and the collected solid was dried in vacuum. The yields for the formation of arylsulfonyl hydrazides range from 68% to 91%.

## 4. General Procedure for the Synthesis of 3-Sulfonylbenzofurans

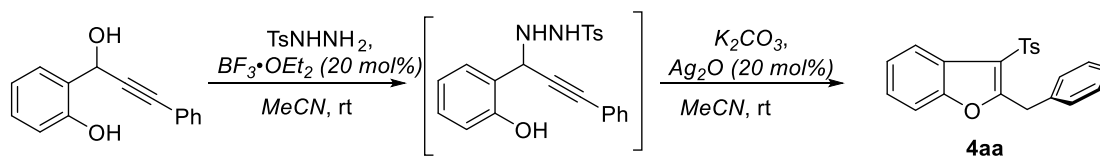

### For 0.2 mmol Scale:

A mixture of **1** (0.20 mmol) and **2** (0.24 mmol) was dissolved in MeCN (2.0 mL), to the solution was added catalyst  $\text{BF}_3 \cdot \text{OEt}_2$  (4  $\mu\text{L}$ , 0.04 mmol) at 0°C, after another 0.5 h, the temperature recovered to 25 °C. Until **1a** was consumed in 2 hours, then catalyst  $\text{Ag}_2\text{O}$  (9.2 mg, 0.04 mmol) and base  $\text{K}_2\text{CO}_3$  (56.2 mg, 0.4 mmol) were added for another 2 hours. Then the solvent was removed and purified by flash column chromatography on silica gel to give the product **4aa**.

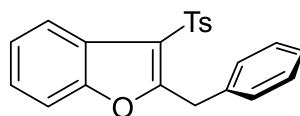

**4aa**

General procedure was followed, **4aa** (56.5 mg, 0.156 mmol) was from *o*-HBA **1a** (44.8 mg, 0.2 mmol) and **2a** (44.6 mg, 0.24 mmol), and purified using silica gel flash column chromatography [20:1 petroleum ether/EtOAc] under normal pressure condition.

**Compound 4aa:** (78% yield,  $R_f = 0.52$  [10:1 petroleum ether/EtOAc], white crystal, mp. =188.2 °C).

$^1\text{H NMR}$  (500 MHz,  $\text{CDCl}_3$ )  $\delta = 7.90 - 7.86$  (m, 1H), 7.79 (d,  $J = 8.1$  Hz, 2H), 7.44 - 7.37 (m, 1H), 7.36 - 7.28 (m, 6H), 7.27 - 7.25 (m, 1H), 7.22 (d,  $J = 8.0$  Hz, 2H), 4.59 (s, 2H), 2.37 ppm (s, 3H);  $^{13}\text{C NMR}$  (126 MHz,  $\text{CDCl}_3$ )  $\delta = 161.4, 153.4, 144.2, 139.3, 135.8, 129.8, 129.0, 128.7, 127.0, 126.8, 125.4, 124.3, 124.1, 120.5, 118.3, 111.4, 33.1, 21.5$  ppm; **IR:**  $\bar{\nu} = 3093, 1568, 1315, 1153, 758 \text{ cm}^{-1}$ ; **HRMS** (ESI):  $m/z$  calcd for  $\text{C}_{22}\text{H}_{19}\text{O}_3\text{SNa}$ : 385.0874; found: 385.0828 [ $M + \text{Na}$ ] $^+$ .

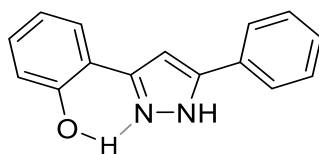

**4aa'**

**Compound 4aa':** (5% yield,  $R_f = 0.50$  [8:1 petroleum ether/EtOAc], white solid, mp. = 109.6 °C).

**$^1\text{H NMR}$**  (500 MHz,  $\text{CDCl}_3$ )  $\delta = 7.72 - 7.57$  (m, 4H), 7.45 (m, 4H), 7.25 – 7.21 (m, 1H), 7.05 (t,  $J = 7.5$  Hz, 1H), 6.94 ppm (dt,  $J = 19.2, 6.8$  Hz, 2H);  **$^{13}\text{C NMR}$**  (126 MHz,  $\text{CDCl}_3$ )  $\delta = 155.9, 152.9, 143.2, 135.2, 129.6, 129.5, 127.3, 127.0, 126.6, 119.5, 117.2, 116.3, 99.8$  ppm; **IR:**  $\bar{\nu} = 3354, 1457, 1259, 971, 749$   $\text{cm}^{-1}$ ; **HRMS** (ESI):  $m/z$  calcd for  $\text{C}_{15}\text{H}_{12}\text{N}_2\text{O}$ : 237.1026; found: 237.1028 [ $M + \text{H}$ ] $^+$ .

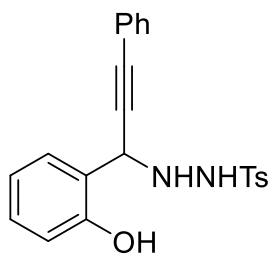

**3aa**

**Compound 3aa:** (99% yield,  $R_f=0.40$  [10:1 petroleum ether / EtOAc], white crystal, mp. = 135.8 °C).

**$^1\text{H NMR}$**  (500 MHz,  $\text{CDCl}_3$ )  $\delta 7.85 - 7.80$  (m, 2H), 7.57 – 7.49 (m, 3H), 7.43 – 7.34 (m, 4H), 7.33 – 7.26 (m, 3H), 7.24 (s, 1H), 6.94 – 6.85 (m, 2H), 6.49 (s, 1H), 5.27 (s, 1H), 2.41 ppm (s, 3H);  **$^{13}\text{C NMR}$**  (126 MHz,  $\text{CDCl}_3$ )  $\delta 155.9, 144.6, 135.1, 132.0, 130.6, 129.9, 129.2, 128.5, 128.2, 127.9, 121.6, 120.1, 120.0, 117.3, 89.4, 83.5, 56.1, 21.6$  ppm; **IR:**  $\bar{\nu} = 3268, 1487, 1320, 1155, 752$   $\text{cm}^{-1}$ ; **HRMS** (ESI):  $m/z$  calcd for  $\text{C}_{22}\text{H}_{19}\text{N}_2\text{O}_3\text{SNa}$ : 385.0874; found: 385.0828 [ $M + \text{Na}$ ] $^+$ .

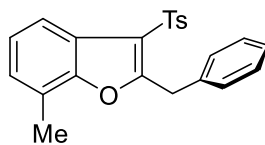

**4ba**

General procedure was followed, **4ba** (45.8 mg, 0.122 mmol) was from *o*-HBA **1b** (47.6 mg, 0.2 mmol) and **2a** (44.6 mg, 0.24 mmol), and purified using silica gel flash column chromatography [20:1 petroleum ether/EtOAc] under normal pressure condition.

**Compound 4ba:** (61% yield,  $R_f = 0.54$  [10:1 petroleum ether/EtOAc], off white solid, mp. = 119.3 °C).

**<sup>1</sup>H NMR** (500 MHz, Chloroform-*d*)  $\delta = 7.77 - 7.72$  (m, 2H), 7.68 (dd,  $J = 7.9, 2.6$  Hz, 1H), 7.36 – 7.27 (m, 5H), 7.19 (dd,  $J = m$ , 3H), 7.09 (m, 1H), 4.59 (d,  $J = 2.8$  Hz, 2H), 2.44 (s, 3H), 2.35 ppm (s, 3H); **<sup>13</sup>C NMR** (126 MHz, CDCl<sub>3</sub>)  $\delta = 161.0, 152.5, 144.1, 139.4, 136.0, 129.7, 129.1, 128.7, 127.0, 126.9, 126.4, 124.4, 123.7, 121.8, 118.4, 118.0, 33.2, 21.5, 14.8$  ppm; **IR:**  $\bar{\nu} = 2923, 1566, 1333, 1148, 786$  cm<sup>-1</sup>; **HRMS** (ESI):  $m/z$  calcd for C<sub>23</sub>H<sub>20</sub>O<sub>3</sub>SNa: 399.1031; found: 399.0985 [ $M + Na$ ]<sup>+</sup>.

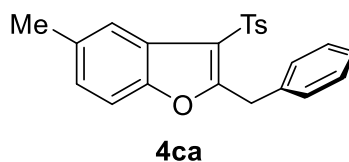

General procedure was followed, **4ca** (43.6 mg, 0.116 mmol) was from *o*-HBA **1c** (47.6 mg, 0.2 mmol) and **2a** (44.6 mg, 0.24 mmol), and purified using silica gel flash column chromatography [20:1 petroleum ether/EtOAc] under normal pressure condition.

**Compound 4ca:** (56% yield,  $R_f = 0.50$  [10:1 petroleum ether/EtOAc], off white solid, mp. = 121.1 °C).

**<sup>1</sup>H NMR** (500 MHz, CDCl<sub>3</sub>)  $\delta = 7.78$  (dd,  $J = 8.3, 2.4$  Hz, 2H), 7.67 (s, 1H), 7.33 – 7.25 (m, 6H), 7.22 (m, 2H), 7.10 (d,  $J = 8.2$  Hz, 1H), 4.55 (s, 2H), 2.44 (s, 3H), 2.36 ppm (s, 3H). **<sup>13</sup>C NMR** (126 MHz, CDCl<sub>3</sub>)  $\delta = 161.5, 151.9, 144.2, 139.4, 135.9, 134.2, 129.8, 129.1, 128.7, 127.0, 126.8, 126.7, 124.2, 120.2, 117.9, 111.0, 33.2, 21.5, 21.5$  ppm. **IR:**  $\bar{\nu} = 3028, 2958, 1471, 1323, 831, 620$  cm<sup>-1</sup>; **HRMS** (ESI):  $m/z$  calcd for C<sub>23</sub>H<sub>20</sub>O<sub>3</sub>SNa: 399.1031; found: 399.0988 [ $M + Na$ ]<sup>+</sup>.



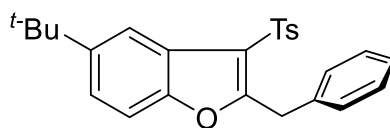

**4da**

General procedure was followed, **4da** (54.3 mg, 0.131 mmol) was from *o*-HBA **1d** (46.0 mg, 0.20 mmol) and **2a** (44.6 mg, 0.24 mmol), and purified using silica gel flash column chromatography [20:1 petroleum ether/EtOAc] under normal pressure condition.

**Compound 4da:** (65% yield,  $R_f = 0.51$  [10:1 petroleum ether/EtOAc], off white solid, mp. = 119.7 °C).

$^1\text{H NMR}$  (500 MHz,  $\text{CDCl}_3$ )  $\delta = 7.83$  (d,  $J = 1.9$  Hz, 1H), 7.78 (d,  $J = 8.1$  Hz, 2H), 7.37 – 7.25 (m, 7H), 7.22 (m, 2H), 4.57 (s, 2H), 2.36 (s, 3H), 1.35 ppm (s, 9H);  $^{13}\text{C NMR}$  (126 MHz,  $\text{CDCl}_3$ )  $\delta = 161.5, 151.8, 147.7, 144.2, 139.4, 136.0, 129.8, 129.1, 128.7, 127.0, 127.0, 123.8, 123.4, 118.3, 116.7, 110.8, 34.9, 33.3, 31.8, 21.6$  ppm; **IR:**  $\bar{\nu} = 3056, 2958, 1471, 1323, 831, 620$   $\text{cm}^{-1}$ ; **HRMS** (ESI):  $m/z$  calcd for  $\text{C}_{26}\text{H}_{26}\text{O}_3\text{SNa}$ : 441.1500; found: 441.1465 [ $M + \text{Na}$ ] $^+$ .

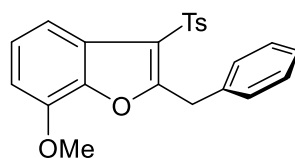

**4ea**

General procedure was followed, **4ea** (32.9 mg, 0.084 mmol) was from *o*-HBA **1e** (50.8 mg, 0.2 mmol) and **2a** (44.6 mg, 0.24 mmol), and purified using silica gel flash column chromatography [20:1 petroleum ether/EtOAc] under normal pressure condition.

**Compound 4ea:** (42% yield,  $R_f = 0.46$  [10:1 petroleum ether/EtOAc], off yellow solid, mp. = 133.8 °C).

$^1\text{H NMR}$  (500 MHz,  $\text{CDCl}_3$ )  $\delta = 7.72$  (d,  $J = 8.2$  Hz, 2H), 7.44 (dd,  $J = 7.9, 1.0$  Hz, 1H), 7.35 – 7.27 (m, 4H), 7.25 – 7.16 (m, 4H), 6.81 (d,  $J = 8.0$  Hz, 1H), 4.59 (s, 2H), 3.94 (s, 3H), 2.35 ppm (s, 3H);  $^{13}\text{C NMR}$  (126 MHz,  $\text{CDCl}_3$ )  $\delta = 161.4, 145.2, 144.2, 142.9, 139.3, 135.9, 129.7, 129.1, 128.7, 127.0, 126.9, 126.0, 125.2, 118.6, 112.6$ ,

107.7, 56.1, 33.2, 21.5 ppm; **IR**:  $\bar{\nu}$  = 2924, 1492, 1278, 1147, 678  $\text{cm}^{-1}$ ; **HRMS** (ESI):  $m/z$  calcd for  $\text{C}_{23}\text{H}_{20}\text{O}_4\text{SNa}$ : 415.0980; found: 415.0935 [ $M + \text{Na}$ ] $^+$ .

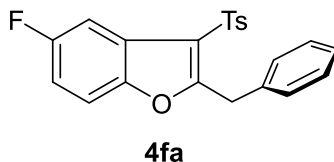

General procedure was followed, **4fa** (47.4 mg, 0.120 mmol) was from *o*-HBA **1f** (48.4 mg, 0.2 mmol) and **2a** (44.6 mg, 0.24 mmol), and purified using silica gel flash column chromatography [20:1 petroleum ether/EtOAc] under normal pressure condition.

**Compound 4fa**: (60% yield,  $R_f$  = 0.46 [10:1 petroleum ether/EtOAc], off white solid, mp. = 126.9  $^{\circ}\text{C}$ ).

**$^1\text{H}$  NMR** (500 MHz,  $\text{CDCl}_3$ )  $\delta$  = 7.77 (d,  $J$  = 8.1 Hz, 2H), 7.55 (m, 1H), 7.37 – 7.27 (m, 6H), 7.24 (d,  $J$  = 8.1 Hz, 2H), 7.01 (m, 1H), 4.56 (s, 2H), 2.38 ppm (s, 3H);  **$^{13}\text{C}$  NMR** (126 MHz,  $\text{CDCl}_3$ )  $\delta$  = 163.0, 160.8, 158.9, 149.6, 144.5, 139.1, 135.5, 129.9, 129.1, 128.8, 127.2, 126.8, 113.5, 113.3, 112.4, 112.3, 106.7, 106.5, 33.3, 21.6 ppm;  **$^{19}\text{F}$  NMR** (471 MHz,  $\text{CDCl}_3$ )  $\delta$  = -117.6 ppm; **IR**:  $\bar{\nu}$  = 3105, 1569, 1327, 1166, 707  $\text{cm}^{-1}$ ; **HRMS** (ESI):  $m/z$  calcd for  $\text{C}_{22}\text{H}_{17}\text{FO}_3\text{SNa}$ : 403.0780; found: 403.0756 [ $M + \text{Na}$ ] $^+$ .

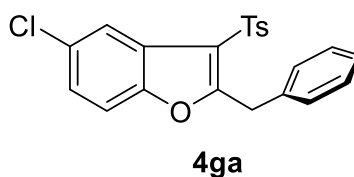

General procedure was followed, **4ga** (44.3 mg, 0.112 mmol) was from *o*-HBA **1g** (51.7 mg, 0.2 mmol) and **2a** (44.6 mg, 0.24 mmol), and purified using silica gel flash column chromatography [20:1 petroleum ether/EtOAc] under normal pressure condition.

**Compound 4ga**: (56% yield,  $R_f$  = 0.48 [10:1 petroleum ether/EtOAc], off white solid, mp. = 127.8  $^{\circ}\text{C}$ ).

**$^1\text{H}$  NMR** (500 MHz,  $\text{CDCl}_3$ )  $\delta$  = 7.87 (d,  $J$  = 2.1 Hz, 1H), 7.77 (d,  $J$  = 8.2 Hz, 2H),

7.34 – 7.28 (m, 5H), 7.27 (m, 2H), 7.24 (m, 2H), 4.55 (s, 2H), 2.38 ppm (s, 3H);  $^{13}\text{C}$  NMR (126 MHz,  $\text{CDCl}_3$ )  $\delta$  = 162.7, 151.8, 144.6, 139.1, 135.4, 130.3, 130.0, 129.1, 128.8, 127.2, 126.8, 125.9, 125.6, 120.3, 112.5, 118.2, 33.3, 21.6 ppm; IR:  $\bar{\nu}$  = 3098, 1560, 1334, 1150, 716  $\text{cm}^{-1}$ ; HRMS (ESI):  $m/z$  calcd for  $\text{C}_{22}\text{H}_{17}\text{ClO}_3\text{SNa}$ : 419.0485; found: 419.0449 [ $M + \text{Na}$ ] $^+$ .

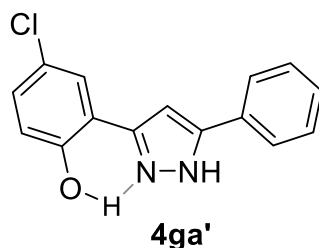

**Compound 4ga'**: (32% yield,  $R_f$  = 0.49 [8:1 petroleum ether/EtOAc], off yellow white, mp. = 150.8  $^{\circ}\text{C}$ ).

$^1\text{H}$  NMR (500 MHz,  $\text{CDCl}_3$ )  $\delta$  = 7.61 (m, 3H), 7.54 – 7.42 (m, 3H), 7.26 (s, 2H), 7.18 (m, 1H), 6.98 (dd,  $J$  = 8.9, 4.2 Hz, 1H), 6.89 ppm (d,  $J$  = 4.1 Hz, 1H);  $^{13}\text{C}$  NMR (126 MHz,  $\text{CDCl}_3$ )  $\delta$  = 154.6, 152.0, 144.2, 129.4, 129.4, 129.2, 128.3, 126.1, 125.7, 124.1, 118.5, 117.7, 99.7 ppm; IR:  $\bar{\nu}$  = 3378, 1454, 1257, 979, 752  $\text{cm}^{-1}$ ; HRMS (ESI):  $m/z$  calcd for  $\text{C}_{15}\text{H}_{11}\text{ClN}_2\text{OH}$ : 271.0644; found: 271.0565 [ $M + \text{H}$ ] $^+$ .

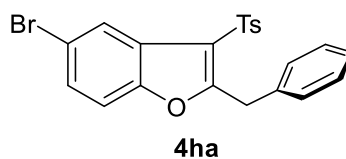

General procedure was followed, **4ha** (52.8 mg, 0.160 mmol) was from *o*-HBA **1h** (60.8 mg, 0.2 mmol) and **2a** (44.6 mg, 0.24 mmol), and purified using silica gel flash column chromatography [20:1 petroleum ether/EtOAc] under normal pressure condition.

**Compound 4ha**: (60% yield,  $R_f$  = 0.49 [10:1 petroleum ether/EtOAc], off white solid, mp. = 114.9  $^{\circ}\text{C}$ ).

$^1\text{H}$  NMR (500 MHz,  $\text{CDCl}_3$ )  $\delta$  = 8.03 (d,  $J$  = 2.0 Hz, 1H), 7.77 (d,  $J$  = 8.4 Hz, 2H), 7.40 (m, 1H), 7.31 – 7.27 (m, 6H), 7.24 (s, 2H), 4.55 (s, 2H), 2.38 ppm (s, 3H);  $^{13}\text{C}$

**NMR** (126 MHz, CDCl<sub>3</sub>)  $\delta$  = 162.6, 152.2, 144.6, 139.0, 135.3, 130.0, 129.1, 128.8, 128.6, 127.2, 126.8, 126.1, 123.3, 118.1, 117.7, 113.0, 33.2, 21.6 ppm; **IR**:  $\bar{\nu}$  = 3088, 1568, 1328, 1151, 816 cm<sup>-1</sup>; **HRMS** (ESI):  $m/z$  calcd for C<sub>22</sub>H<sub>17</sub>BrO<sub>3</sub>SNa: 462.9979; found: 462.9946 [ $M + Na$ ]<sup>+</sup>.

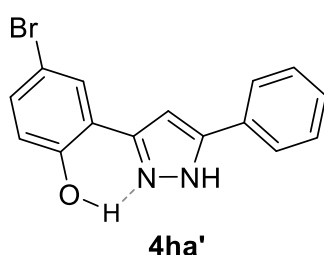

**Compound 4ha'**: (38% yield,  $R_f$  = 0.49 [8:1 petroleum ether/EtOAc], off yellow white, mp. = 138.8 °C).

**<sup>1</sup>H NMR** (500 MHz, CDCl<sub>3</sub>)  $\delta$  = 7.73 (m, 1H), 7.61 (d,  $J$  = 7.5 Hz, 2H), 7.54 – 7.41 (m, 4H), 7.31 (dt,  $J$  = 8.7, 2.1 Hz, 1H), 7.26 (s, 1H), 6.97 – 6.85 ppm (m, 2H); **<sup>13</sup>C NMR** (126 MHz, CDCl<sub>3</sub>)  $\delta$  = 154.1, 150.8, 143.2, 131.1, 128.4, 128.3, 128.0, 127.3, 124.7, 118.0, 117.2, 110.2, 98.7 ppm; **IR**:  $\bar{\nu}$  = 3378, 1560, 1450, 1256, 977, 758 cm<sup>-1</sup>; **HRMS** (ESI):  $m/z$  calcd for C<sub>15</sub>H<sub>11</sub>BrN<sub>2</sub>OH: 315.0138; found: 315.0069 [ $M + H$ ]<sup>+</sup>.

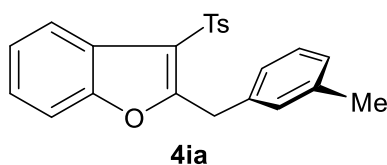

General procedure was followed, **4ia** (43.6 mg, 0.116 mmol) was from *o*-HBA **1i** (47.6 mg, 0.2 mmol) and **2a** (44.6 mg, 0.24 mmol), and purified using silica gel flash column chromatography [20:1 petroleum ether/EtOAc] under normal pressure condition.

**Compound 4ia**: (64% yield,  $R_f$  = 0.45 [10:1 petroleum ether/EtOAc], off white solid, mp. = 91.3 °C).

**<sup>1</sup>H NMR** (500 MHz, CDCl<sub>3</sub>)  $\delta$  = 7.92 – 7.87 (m, 1H), 7.79 (d,  $J$  = 8.4 Hz, 2H), 7.43 – 7.38 (m, 1H), 7.33 – 7.27 (m, 2H), 7.22 (d,  $J$  = 8.1 Hz, 2H), 7.18 (t,  $J$  = 7.9 Hz, 1H), 7.11 (d,  $J$  = 7.6 Hz, 1H), 7.07 – 7.03 (m, 2H), 4.53 (s, 2H), 2.36 (s, 3H), 2.28 ppm (s,

3H);  $^{13}\text{C}$  NMR (126 MHz,  $\text{CDCl}_3$ )  $\delta$  = 161.6, 153.5, 144.2, 139.5, 138.4, 135.7, 129.8, 129.7, 128.6, 127.8, 126.9, 126.2, 125.4, 124.4, 124.3, 120.6, 118.4, 111.5, 33.1, 21.5, 21.3 ppm; IR:  $\bar{\nu}$  = 2922, 1567, 1247, 1150, 813  $\text{cm}^{-1}$ ; HRMS (ESI):  $m/z$  calcd for  $\text{C}_{23}\text{H}_{20}\text{O}_3\text{SNa}$ : 399.1031; found: 399.0985 [ $M + \text{Na}$ ] $^+$ .

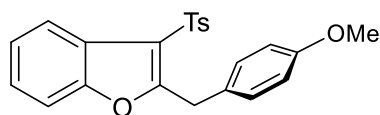

**4ja**

General procedure was followed, **4ja** (49.4 mg, 0.116 mmol) was from *o*-HBA **1j** (47.6 mg, 0.2 mmol) and **2a** (44.6 mg, 0.24 mmol), and purified using silica gel flash column chromatography [20:1 petroleum ether/EtOAc] under normal pressure condition

**Compound 4ja:** (63% yield,  $R_f$  = 0.45 [10:1 petroleum ether/EtOAc], off white solid, mp. = 122.4  $^\circ\text{C}$ ).

$^1\text{H}$  NMR (500 MHz,  $\text{CDCl}_3$ )  $\delta$  = 7.88 – 7.84 (m, 1H), 7.80 (d,  $J$  = 8.3 Hz, 2H), 7.42 – 7.38 (m, 1H), 7.31 – 7.27 (m, 3H), 7.25 – 7.21 (m, 3H), 6.86 – 6.80 (m, 2H), 4.50 (s, 2H), 3.78 (s, 3H), 2.37 (s, 3H);  $^{13}\text{C}$  NMR (126 MHz,  $\text{CDCl}_3$ )  $\delta$  = 161.9, 158.8, 153.5, 144.2, 139.6, 130.2, 129.8, 127.9, 126.9, 125.4, 124.4, 124.3, 120.6, 118.1, 114.2, 111.5, 55.3, 32.4, 21.5 ppm; IR:  $\bar{\nu}$  = 2925, 1564, 1315, 1151, 807  $\text{cm}^{-1}$ ; HRMS (ESI):  $m/z$  calcd for  $\text{C}_{23}\text{H}_{20}\text{O}_4\text{SNa}$ : 415.0980; found: 415.0941 [ $M + \text{Na}$ ] $^+$ .

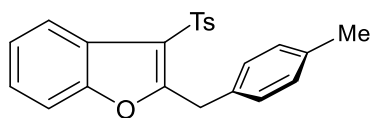

**4ka**

General procedure was followed, **4ka** (43.6 mg, 0.116 mmol) was from *o*-HBA **1k** (47.6 mg, 0.2 mmol) and **2a** (44.6 mg, 0.24 mmol), and purified using silica gel flash column chromatography [20:1 petroleum ether/EtOAc] under normal pressure condition.

**Compound 4ka:** (58% yield,  $R_f$  = 0.56 [10:1 petroleum ether/EtOAc], off white solid, mp. = 172.3  $^\circ\text{C}$ ).

**<sup>1</sup>H NMR** (500 MHz, CDCl<sub>3</sub>)  $\delta$  = 7.87 (m, 1H), 7.83 – 7.79 (m, 2H), 7.40 (m, 1H), 7.33 – 7.26 (m, 2H), 7.22 (m, 4H), 7.10 (d,  $J$  = 7.7 Hz, 2H), 4.53 (s, 2H), 2.37 (s, 3H), 2.32 ppm (s, 3H); **<sup>13</sup>C NMR** (126 MHz, CDCl<sub>3</sub>)  $\delta$  = 160.7, 152.5, 143.2, 138.4, 135.7, 131.7, 128.8, 128.4, 128.0, 125.8, 124.4, 123.3, 123.2, 119.5, 117.1, 110.4, 31.8, 20.5, 20.0 ppm; **IR**:  $\bar{\nu}$  = 3022, 1567, 1151, 1052, 814, cm<sup>-1</sup>; **HRMS** (ESI):  $m/z$  calcd for C<sub>23</sub>H<sub>20</sub>O<sub>3</sub>SNa: 399.1031; found: 399.0986 [ $M + Na$ ]<sup>+</sup>.

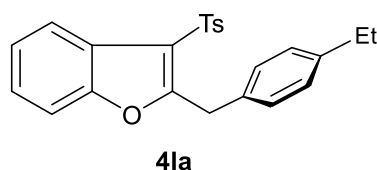

General procedure was followed, **4la** (54.6 mg, 0.116 mmol) was from *o*-HBA **1l** (50.4 mg, 0.2 mmol) and **2a** (44.6 mg, 0.24 mmol), and purified using silica gel flash column chromatography [20:1 petroleum ether/EtOAc] under normal pressure condition.

**Compound 4la:** (70% yield,  $R_f$  = 0.51 [10:1 petroleum ether/EtOAc], off white solid, mp. = 121.9 °C).

**<sup>1</sup>H NMR** (500 MHz, CDCl<sub>3</sub>)  $\delta$  = 7.89 – 7.85 (m, 1H), 7.79 (dd,  $J$  = m, 2H), 7.40 (dt,  $J$  = 7.6, 2.8 Hz, 1H), 7.31 – 7.27 (m, 2H), 7.22 (dd,  $J$  = 10.8, 8.0 Hz, 4H), 7.12 (d,  $J$  = 7.8 Hz, 2H), 4.54 (s, 2H), 2.62 (q,  $J$  = 7.6 Hz, 2H), 2.36 (s, 3H), 1.22 ppm (t,  $J$  = 7.6 Hz, 3H). **<sup>13</sup>C NMR** (126 MHz, CDCl<sub>3</sub>)  $\delta$  = 161.8, 153.5, 144.2, 143.1, 139.5, 133.0, 129.8, 129.1, 128.2, 126.9, 125.4, 124.3, 124.3, 120.6, 118.2, 111.5, 32.8, 28.5, 21.5, 15.6 ppm. **IR**:  $\bar{\nu}$  = 2923, 1567, 1452, 1195, 822 cm<sup>-1</sup>; **HRMS** (ESI):  $m/z$  calcd for C<sub>24</sub>H<sub>22</sub>O<sub>3</sub>SNa: 413.1187; found: 413.1149 [ $M + Na$ ]<sup>+</sup>.

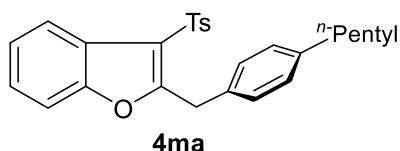

General procedure was followed, **4ma** (43.2 mg, 0.116 mmol) was from *o*-HBA **1m** (58.8 mg, 0.2 mmol) and **2a** (44.6 mg, 0.24 mmol), and purified using silica gel flash column chromatography [20:1 petroleum ether/EtOAc] under normal pressure

condition.

**Compound 4ma:** (50% yield,  $R_f = 0.54$  [10:1 petroleum ether/EtOAc], off white solid, mp. = 99.4 °C).

$^1\text{H NMR}$  (500 MHz,  $\text{CDCl}_3$ )  $\delta = 7.87$  (m, 1H), 7.78 (m, 2H), 7.40 (m, 1H), 7.29 (m, 2H), 7.22 (dd,  $J = 10.5, 8.0$  Hz, 4H), 7.10 (d,  $J = 7.7$  Hz, 2H), 4.54 (s, 2H), 2.57 (t,  $J = 7.8$  Hz, 2H), 2.37 (s, 3H), 1.59 (m, 2H), 1.32 (m, 4H), 0.89 ppm (t,  $J = 6.8$  Hz, 3H);  $^{13}\text{C NMR}$  (126 MHz,  $\text{CDCl}_3$ )  $\delta = 161.8, 153.5, 144.2, 141.8, 139.4, 132.9, 129.8, 129.0, 128.7, 128.0, 126.9, 125.4, 124.3, 120.5, 118.1, 111.5, 35.5, 32.8, 31.5, 31.2, 22.5, 21.5, 14.0$  ppm; **IR:**  $\bar{\nu} = 2928, 1565, 1303, 1152, 846$   $\text{cm}^{-1}$ ; **HRMS** (ESI):  $m/z$  calcd for  $\text{C}_{27}\text{H}_{28}\text{O}_3\text{SNa}$ : 455.1657; found: 455.1654 [ $M + \text{Na}$ ] $^+$ .

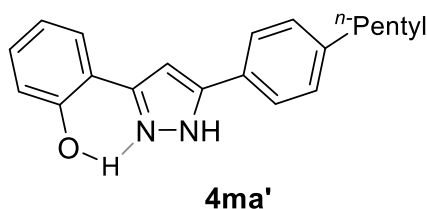

**Compound 4ma':** (29% yield,  $R_f = 0.50$  [8:1 petroleum ether/EtOAc], off white solid, mp. = 118.8 °C).

$^1\text{H NMR}$  (500 MHz,  $\text{CDCl}_3$ )  $\delta = 7.63$  (m, 1H), 7.50 (t,  $J = 6.9$  Hz, 2H), 7.24 (dd,  $J = 7.1, 3.9$  Hz, 3H), 7.06 (t,  $J = 6.8$  Hz, 1H), 6.94 (q,  $J = 6.9$  Hz, 1H), 6.86 (m, 1H), 2.63 (q,  $J = 7.2$  Hz, 2H), 1.63 (p,  $J = 7.3$  Hz, 2H), 1.34 (dq,  $J = 7.1, 3.6, 3.2$  Hz, 4H), 0.90 ppm (t,  $J = 6.5$  Hz, 3H);  $^{13}\text{C NMR}$  (126 MHz,  $\text{CDCl}_3$ )  $\delta = 155.9, 152.9, 144.3, 144.1, 129.4, 129.3, 126.6, 126.1, 125.6, 119.5, 117.1, 116.7, 99.1, 35.7, 31.5, 31.0, 22.6, 14.0$  ppm; **IR:**  $\bar{\nu} = 3376, 2927, 1589, 1309, 828$   $\text{cm}^{-1}$ ; **HRMS** (ESI):  $m/z$  calcd for  $\text{C}_{20}\text{H}_{22}\text{N}_2\text{OH}$ : 307.1816; found: 307.1747 [ $M + \text{H}$ ] $^+$ .

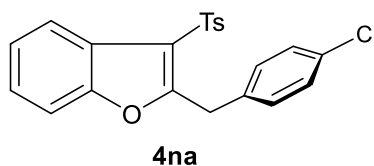

General procedure was followed, **4na** (43.6 mg, 0.116 mmol) was from *o*-HBA **1n**

(51.7 mg, 0.2 mmol) and **2a** (44.6 mg, 0.24 mmol), and purified using silica gel flash column chromatography [20:1 petroleum ether/EtOAc] under normal pressure condition.

**Compound 4na:** (55% yield,  $R_f = 0.49$  [10:1 petroleum ether/EtOAc], off yellow solid, mp. = 127.5 °C).

$^1\text{H NMR}$  (500 MHz,  $\text{CDCl}_3$ )  $\delta = 7.90 - 7.86$  (m, 1H), 7.81 - 7.76 (m, 2H), 7.43 - 7.39 (m, 1H), 7.32 (m, 2H), 7.26 - 7.22 (m, 6H), 4.54 (s, 2H), 2.37 ppm (s, 3H);  $^{13}\text{C NMR}$  (126 MHz,  $\text{CDCl}_3$ )  $\delta = 160.7, 153.5, 144.4, 139.2, 134.2, 133.0, 130.4, 129.9, 128.8, 126.8, 125.6, 124.5, 124.1, 120.6, 118.5, 111.5, 32.5, 21.6$  ppm; **IR:**  $\bar{\nu} = 2921, 1566, 1300, 1153, 803$   $\text{cm}^{-1}$ ; **HRMS** (ESI):  $m/z$  calcd for  $\text{C}_{22}\text{H}_{17}\text{ClO}_3\text{SNa}$ : 419.0485; found: 419.0431 [ $M + \text{Na}$ ] $^+$ .

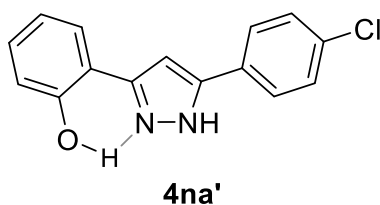

**Compound 4na':** (29% yield,  $R_f = 0.47$  [8:1 petroleum ether/EtOAc], off yellow solid, mp. = 187.8 °C).

$^1\text{H NMR}$  (500 MHz,  $\text{CDCl}_3$ )  $\delta = 7.62$  (dd,  $J = 7.7, 1.7$  Hz, 1H), 7.58 - 7.53 (m, 2H), 7.45 (d,  $J = 8.4$  Hz, 2H), 7.24 (d,  $J = 7.2$  Hz, 3H), 7.04 (d,  $J = 8.1$  Hz, 1H), 6.97 - 6.87 ppm (m, 2H);  $^{13}\text{C NMR}$  (126 MHz,  $\text{CDCl}_3$ )  $\delta = 156.0, 153.1, 144.1, 129.5, 129.3, 129.2, 128.8, 126.6, 125.7, 119.4, 117.1, 116.5, 99.6$  ppm; **IR:**  $\bar{\nu} = 3345, 2923, 1456, 1260, 971, 750$   $\text{cm}^{-1}$ ; **HRMS** (ESI):  $m/z$  calcd for  $\text{C}_{15}\text{H}_{11}\text{N}_3\text{O}_3\text{H}$ : 271.0644; found: 271.0565 [ $M + \text{H}$ ] $^+$ .

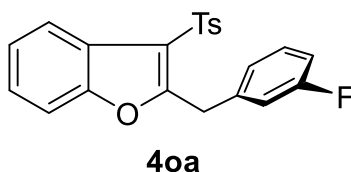

General procedure was followed, **4oa** (38.0 mg, 0.10 mmol) was from *o*-HBA **1o**



(48.4 mg, 0.2 mmol) and **2a** (44.6 mg, 0.24 mmol), and purified using silica gel flash column chromatography [20:1 petroleum ether/EtOAc] under normal pressure condition

**Compound 4oa:** (50% yield,  $R_f = 0.48$  [10:1 petroleum ether/EtOAc], off white solid, mp. = 176.2 °C).

$^1\text{H NMR}$  (500 MHz,  $\text{CDCl}_3$ )  $\delta = 7.91 - 7.86$  (m, 1H), 7.80 (d,  $J = 8.4$  Hz, 2H), 7.45 - 7.40 (m, 1H), 7.32 (dd,  $J = 6.1, 3.2$  Hz, 2H), 7.29 - 7.26 (m, 1H), 7.24 (d,  $J = 8.0$  Hz, 2H), 7.12 (dd,  $J = 7.7, 1.4$  Hz, 1H), 7.01 - 6.92 (m, 2H), 4.57 (s, 2H), 2.37 ppm (s, 3H);  $^{13}\text{C NMR}$  (126 MHz,  $\text{CDCl}_3$ )  $\delta = 163.9, 161.9, 160.4, 153.5, 144.4, 139.3, 138.1, 138.0, 130.2, 130.1, 129.9, 126.8, 125.7, 124.8, 124.8, 124.5, 124.1, 120.7, 118.8, 116.1, 116.0, 114.1, 114.0, 111.5, 32.9, 21.6$  ppm;  $^{19}\text{F NMR}$  (471 MHz,  $\text{CDCl}_3$ )  $\delta = -112.7$  ppm; **IR:**  $\bar{\nu} = 3060, 1569, 1449, 1152, 759$   $\text{cm}^{-1}$ ; **HRMS** (ESI):  $m/z$  calcd for  $\text{C}_{22}\text{H}_{17}\text{FO}_3\text{SNa}$ : 403.0780; found: 403.0729 [ $M + \text{Na}$ ] $^+$ .

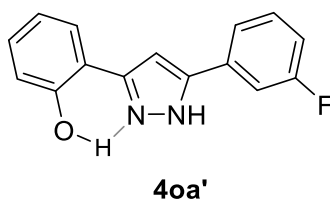

**Compound 4oa':** (36% yield,  $R_f = 0.47$  [8:1 petroleum ether/EtOAc], off yellow solid, mp. = 126.7 °C).

$^1\text{H NMR}$  (500 MHz,  $\text{CDCl}_3$ )  $\delta = 7.63$  (dd,  $J = 7.8, 1.7$  Hz, 1H), 7.47 (td,  $J = 7.9, 5.7$  Hz, 1H), 7.41 (dt,  $J = 7.8, 1.3$  Hz, 1H), 7.34 (dt,  $J = 9.4, 2.0$  Hz, 1H), 7.27 (d,  $J = 1.7$  Hz, 3H), 7.13 (m, 1H), 7.05 (dd,  $J = 8.2, 1.2$  Hz, 1H), 6.99 - 6.91 ppm (m, 2H);  $^{13}\text{C NMR}$  (126 MHz,  $\text{CDCl}_3$ )  $\delta = 155.9, 153.0, 144.1, 129.5, 129.3, 129.2, 128.7, 126.6, 125.7, 119.4, 117.1, 116.4, 99.6$  ppm;  $^{19}\text{F NMR}$  (471 MHz,  $\text{CDCl}_3$ )  $\delta = -111.5$  ppm; **IR:**  $\bar{\nu} = 3393, 1589, 1462, 1153, 748$   $\text{cm}^{-1}$ ; **HRMS** (ESI):  $m/z$  calcd for  $\text{C}_{15}\text{H}_{11}\text{FN}_2\text{OH}$ : 255.0939; found: 255.0856 [ $M + \text{H}$ ] $^+$ .

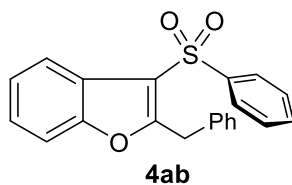

A mixture of **1a** (44.8 mg, 0.20 mmol) and **2b** (41.2 mg, 0.24 mmol) was dissolved in MeCN (2.0 mL), to the solution was added catalyst  $\text{BF}_3 \cdot \text{OEt}_2$  (4  $\mu\text{L}$ , 0.04 mmol) at 0 °C, after another 0.5 h, the temperature recover to 25 °C. Until **1a** disappeared, then catalyst  $\text{Ag}_2\text{O}$  (9.2 mg, 0.04 mmol) and base  $\text{K}_2\text{CO}_3$  (56.2 mg, 0.4 mmol) was added at 15°C for another 2 hours. Then the solvent was removed and purified by flash column chromatography on silica gel to give the product **4ab** (42.3 mg, 0.122 mmol).

**Compound 4ab:** (61% yield,  $R_f = 0.52$  [10:1 petroleum ether/EtOAc], white solid, mp. =163.2 °C).

$^1\text{H NMR}$  (500 MHz,  $\text{CDCl}_3$ )  $\delta = 7.90$  (m, 3H), 7.56 – 7.53 (m, 1H), 7.46 – 7.40 (m, 3H), 7.34 – 7.25 (m, 7H), 4.59 ppm (s, 2H);  $^{13}\text{C NMR}$  (126 MHz,  $\text{CDCl}_3$ )  $\delta = 161.8, 153.5, 142.2, 135.7, 133.3, 129.2, 129.1, 128.7, 127.1, 126.8, 125.5, 124.5, 124.2, 120.6, 118.0, 111.5, 33.2$  ppm; **IR:**  $\bar{\nu} = 3258, 2925, 1448, 1155, 758$   $\text{cm}^{-1}$ ; **HRMS** (ESI):  $m/z$  calcd for  $\text{C}_{21}\text{H}_{16}\text{O}_3\text{SNa}$ : 371.0721; found: 371.0667 [ $M + \text{Na}$ ] $^+$ .

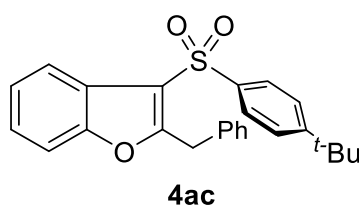

General procedure was followed, **4ac** (50.9 mg, 0.126 mmol) was from *o*-HBA **1a** (44.8 mg, 0.2 mmol) and **2c** (43.0 mg, 0.24 mmol), and purified using silica gel flash column chromatography [20:1 petroleum ether/EtOAc] under normal pressure condition.

**Compound 4ac:** (63% yield,  $R_f = 0.52$  [10:1 petroleum ether/EtOAc], off yellow solid, mp. = 176.2 °C).

$^1\text{H NMR}$  (500 MHz,  $\text{CDCl}_3$ )  $\delta = 7.95 - 7.90$  (m, 1H), 7.82 (d,  $J = 8.6$  Hz, 2H), 7.45 – 7.39 (m, 3H), 7.33 – 7.27 (m, 7H), 4.58 (s, 2H), 1.28 ppm (s, 9H);  $^{13}\text{C NMR}$  (126 MHz,  $\text{CDCl}_3$ )  $\delta = 161.5, 157.2, 153.5, 139.2, 135.8, 129.1, 128.7, 127.0, 126.6, 126.2,$

125.5, 124.4, 124.3, 120.7, 118.4, 111.5, 35.2, 33.2, 31.0 ppm; **IR**:  $\bar{\nu}$  = 2963, 1567, 1323, 1149, 767  $\text{cm}^{-1}$ ; **HRMS** (ESI):  $m/z$  calcd for  $\text{C}_{25}\text{H}_{24}\text{O}_3\text{SNa}$ : 427.1344; found: 427.1302 [ $M + \text{Na}$ ] $^+$ .

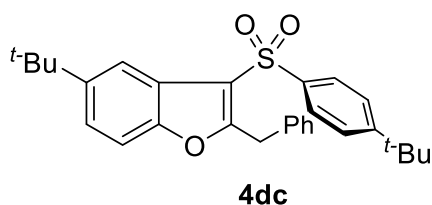

General procedure was followed, **4dc** (60.7 mg, 0.116 mmol) was from *o*-HBA **1d** (53.8 mg, 0.2 mmol) and **2c** (43.0 mg, 0.24 mmol), and purified using silica gel flash column chromatography [20:1 petroleum ether/EtOAc] under normal pressure condition.

**Compound 4dc**: (66% yield,  $R_f$  = 0.52 [10:1 petroleum ether/EtOAc], off white solid, mp. = 128.9 °C).

**<sup>1</sup>H NMR** (500 MHz,  $\text{CDCl}_3$ )  $\delta$  = 7.84 (m, 3H), 7.43 (dd,  $J$  = 8.6, 3.6 Hz, 2H), 7.38 – 7.27 (m, 4H), 7.26 – 7.20 (m, 3H), 4.57 (d,  $J$  = 3.6 Hz, 2H), 1.35 (s, 9H), 1.28 ppm (s, 9H); **<sup>13</sup>C NMR** (126 MHz,  $\text{CDCl}_3$ )  $\delta$  = 161.6, 157.2, 151.8, 147.7, 139.4, 136.0, 129.0, 128.7, 127.0, 126.8, 126.1, 124.0, 123.3, 118.4, 116.8, 110.7, 35.2, 34.9, 33.3, 31.7, 31.0 ppm; **IR**:  $\bar{\nu}$  = 2961, 1455, 1159, 898, 758  $\text{cm}^{-1}$ ; **HRMS** (ESI):  $m/z$  calcd for  $\text{C}_{29}\text{H}_{32}\text{O}_3\text{SNa}$ : 483.1970; found: 483.1945 [ $M + \text{Na}$ ] $^+$ .

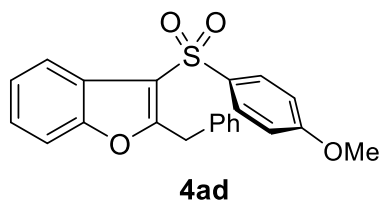

General procedure was followed, **4ad** (50.6 mg, 0.134 mmol) was from *o*-HBA **1a** (44.8 mg, 0.2 mmol) and **2d** (48.4 mg, 0.24 mmol), and purified using silica gel flash column chromatography [20:1 petroleum ether/EtOAc] under normal pressure condition.

**Compound 4ad**: (67% yield,  $R_f$  = 0.45 [10:1 petroleum ether/EtOAc], off yellow

solid, mp. = 150.8 °C).

**<sup>1</sup>H NMR** (500 MHz, CDCl<sub>3</sub>)  $\delta$  = 7.89 – 7.86 (m, 1H), 7.83 (d,  $J$  = 9.0 Hz, 2H), 7.43 – 7.40 (m, 1H), 7.35 – 7.28 (m, 6H), 7.27 – 7.25 (m, 1H), 6.88 (d,  $J$  = 8.9 Hz, 2H), 4.59 (s, 2H), 3.81 ppm (s, 3H); **<sup>13</sup>C NMR** (126 MHz, CDCl<sub>3</sub>)  $\delta$  = 162.3, 160.0, 152.4, 134.8, 132.8, 128.0, 128.0, 127.7, 126.0, 124.4, 123.3, 123.1, 119.5, 117.6, 113.3, 110.4, 54.5, 32.1 ppm; **IR**:  $\bar{\nu}$  = 3264, 1568, 1313, 1169, 759 cm<sup>-1</sup>; **HRMS** (ESI):  $m/z$  calcd for C<sub>22</sub>H<sub>18</sub>O<sub>4</sub>SNa: 401.0823; found: 401.0778 [ $M$  + Na]<sup>+</sup>.

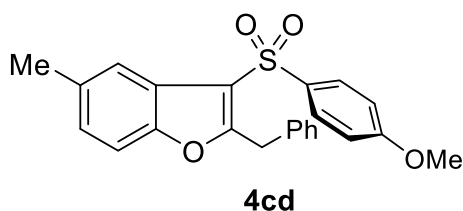

General procedure was followed, **4cd** (52.5 mg, 0.116 mmol) was from *o*-HBA **1c** (51.7 mg, 0.2 mmol) and **2d** (48.5 mg, 0.24 mmol), and purified using silica gel flash column chromatography [20:1 petroleum ether/EtOAc] under normal pressure condition

**Compound 4cd**: (67% yield,  $R_f$  = 0.52 [10:1 petroleum ether/EtOAc], off white solid, mp. = 93.8 °C).

**<sup>1</sup>H NMR** (500 MHz, CDCl<sub>3</sub>)  $\delta$  = 7.82 (td,  $J$  = 6.7, 3.2 Hz, 2H), 7.67 (d,  $J$  = 5.2 Hz, 1H), 7.29 (m, 6H), 7.14 – 7.08 (m, 1H), 6.88 (m, 2H), 4.54 (s, 2H), 3.84 (s, 3H), 2.45 ppm (s, 3H); **<sup>13</sup>C NMR** (126 MHz, CDCl<sub>3</sub>)  $\delta$  = 163.4, 161.2, 152.0, 136.0, 134.2, 134.1, 129.0, 129.0, 128.7, 127.0, 126.7, 124.3, 120.3, 118.4, 114.3, 111.0, 55.6, 33.2, 21.5 ppm; **IR**:  $\bar{\nu}$  = 3025, 2842, 1592, 1114, 803 cm<sup>-1</sup> **HRMS** (ESI):  $m/z$  calcd for C<sub>23</sub>H<sub>20</sub>O<sub>4</sub>SNa: 415.0980; found: 415.0941 [ $M$  + Na]<sup>+</sup>.

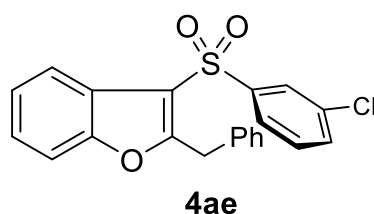

General procedure was followed, **4ae** (41.2 mg, 0.108 mmol) was from *o*-HBA **1a**

(44.8 mg, 0.2 mmol) and **2e** (52.9 mg, 0.24 mmol), and purified using silica gel flash column chromatography [20:1 petroleum ether/EtOAc] under normal pressure condition.

**Compound 4ae:** (54% yield,  $R_f = 0.53$  [10:1 petroleum ether/EtOAc], off white solid, mp. = 103.6 °C).

$^1\text{H NMR}$  (500 MHz,  $\text{CDCl}_3$ )  $\delta = 7.89 - 7.84$  (m, 1H), 7.81 (m, 1H), 7.76 (m, 1H), 7.50 – 7.43 (m, 2H), 7.38 – 7.30 (m, 7H), 7.30 – 7.26 (m, 1H), 4.59 ppm (s, 2H);  $^{13}\text{C NMR}$  (126 MHz,  $\text{CDCl}_3$ )  $\delta = 162.3, 153.5, 143.8, 135.5, 135.4, 133.4, 130.4, 129.0, 128.8, 127.3, 126.9, 125.7, 124.9, 124.7, 124.0, 120.4, 117.3, 111.6, 33.2$  ppm; **IR:**  $\bar{\nu} = 3093, 1560, 1345, 1155, 750$   $\text{cm}^{-1}$ ; **HRMS** (ESI):  $m/z$  calcd for  $\text{C}_{21}\text{H}_{15}\text{ClO}_3\text{SNa}$ : 405.0328; found: 405.0282 [ $M + \text{Na}$ ] $^+$ .

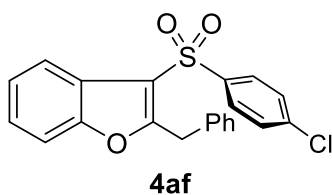

General procedure was followed, **4af** (58.9 mg, 0.154 mmol) was from *o*-HBA **1a** (44.8 mg, 0.2 mmol) and **2f** (53.1 mg, 0.24 mmol), and purified using silica gel flash column chromatography [20:1 petroleum ether/EtOAc] under normal pressure condition.

**Compound 4af:** (77% yield,  $R_f = 0.54$  [10:1 petroleum ether/EtOAc], off white solid, mp. = 122.9 °C).

$^1\text{H NMR}$  (500 MHz,  $\text{CDCl}_3$ )  $\delta = 7.89 - 7.86$  (m, 1H), 7.76 (d,  $J = 8.7$  Hz, 2H), 7.44 – 7.37 (m, 1H), 7.35 – 7.31 (m, 6H), 7.27 (s, 1H), 7.25 (d,  $J = 4.6$  Hz, 2H), 4.57 ppm (s, 2H);  $^{13}\text{C NMR}$  (126 MHz,  $\text{CDCl}_3$ )  $\delta = 162.0, 153.5, 140.6, 139.9, 135.6, 129.4, 129.0, 128.8, 128.2, 127.1, 125.7, 124.6, 124.0, 120.3, 117.6, 111.6, 33.2$  ppm; **IR:**  $\bar{\nu} = 2925, 1566, 1395, 1155, 759$   $\text{cm}^{-1}$ ; **HRMS** (ESI):  $m/z$  calcd for  $\text{C}_{21}\text{H}_{15}\text{ClO}_3\text{SNa}$ : 405.0328; found: 405.0268 [ $M + \text{Na}$ ] $^+$ .

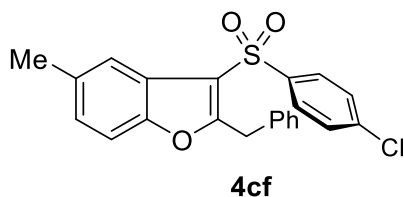

General procedure was followed, **4cf** (51.4 mg, 0.116 mmol) was from *o*-HBA **1c** (47.6 mg, 0.2 mmol) and **2f** (41.2 mg, 0.24 mmol), and purified using silica gel flash column chromatography [20:1 petroleum ether/EtOAc] under normal pressure condition.

**Compound 4cf:** (65% yield,  $R_f = 0.54$  [10:1 petroleum ether/EtOAc], off white solid, mp. = 105.6 °C).

**$^1\text{H}$  NMR** (500 MHz,  $\text{CDCl}_3$ )  $\delta = 7.75$  (d,  $J = 8.4$  Hz, 2H), 7.64 (s, 1H), 7.36 (d,  $J = 8.5$  Hz, 2H), 7.33 – 7.27 (m, 3H), 7.25 (m, 3H), 7.12 (dd,  $J = 8.4, 1.8$  Hz, 1H), 4.54 (s, 2H), 2.44 ppm (s, 3H);  **$^{13}\text{C}$  NMR** (126 MHz,  $\text{CDCl}_3$ )  $\delta = 162.1, 152.0, 140.8, 139.8, 135.7, 134.5, 129.4, 129.0, 128.8, 128.2, 127.1, 127.0, 124.1, 120.1, 117.3, 111.1, 33.3, 21.5$  ppm; **IR:**  $\bar{\nu} = 3028, 1568, 1468, 1147, 806$   $\text{cm}^{-1}$ ; **HRMS** (ESI):  $m/z$  calcd for  $\text{C}_{22}\text{H}_{17}\text{ClO}_3\text{SK}$ : 435.0224; found: 435.0191 [ $M + K$ ] $^+$ .

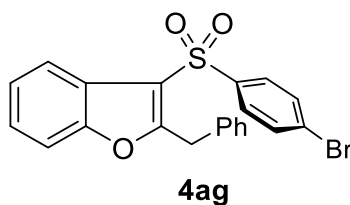

General procedure was followed, **4ag** (68.2 mg, 0.161 mmol) was from *o*-HBA **1a** (44.8 mg, 0.2 mmol) and **2g** (64.08 mg, 0.24 mmol), and purified using silica gel flash column chromatography [20:1 petroleum ether/EtOAc] under normal pressure condition.

**Compound 4ag:** (80% yield,  $R_f = 0.49$  [10:1 petroleum ether/EtOAc], off white solid, mp. = 150.8 °C).

**$^1\text{H}$  NMR** (500 MHz,  $\text{CDCl}_3$ )  $\delta = 7.88 - 7.81$  (m, 1H), 7.69 (m, 2H), 7.57 – 7.49 (m, 2H), 7.45 (m, 1H), 7.35 – 7.28 (m, 6H), 7.27 – 7.26 (m, 1H), 4.61 – 4.51 ppm (m, 2H);  **$^{13}\text{C}$  NMR** (126 MHz,  $\text{CDCl}_3$ )  $\delta = 162.0, 153.5, 141.2, 135.6, 132.5, 129.0, 128.8,$

128.5, 128.3, 127.2, 125.7, 124.6, 124.0, 120.4, 117.6, 111.6, 33.2 ppm; **IR**:  $\bar{\nu}$  = 3083, 1569, 1318, 1152, 758  $\text{cm}^{-1}$ ; **HRMS** (ESI):  $m/z$  calcd for  $\text{C}_{21}\text{H}_{15}\text{BrO}_3\text{SNa}$ : 448.9823; found: 448.9772  $[M + \text{Na}]^+$ .

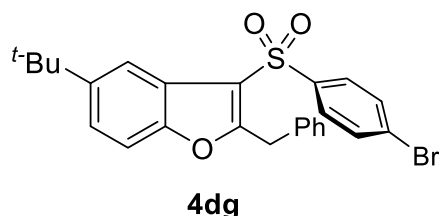

General procedure was followed, **4dg** (68.4 mg, 0.116 mmol) was from *o*-HBA **1d** (53.8 mg, 0.2 mmol) and **2g** (60.4mg, 0.24 mmol), and purified using silica gel flash column chromatography [20:1 petroleum ether/EtOAc] under normal pressure condition.

**Compound 4dg**: (71% yield,  $R_f$  = 0.49 [10:1 petroleum ether/EtOAc], off white solid, mp. = 123.6 °C).

**$^1\text{H}$  NMR** (500 MHz,  $\text{CDCl}_3$ )  $\delta$  = 7.80 (d,  $J$  = 1.9 Hz, 1H), 7.68 (d,  $J$  = 8.6 Hz, 2H), 7.52 (d,  $J$  = 8.7 Hz, 2H), 7.41 – 7.34 (m, 2H), 7.28 (d,  $J$  = 4.3 Hz, 5H), 4.55 (s, 2H), 1.36 ppm (s, 9H);  **$^{13}\text{C}$  NMR** (126 MHz,  $\text{CDCl}_3$ )  $\delta$  = 162.1, 151.8, 148.0, 141.3, 135.8, 132.4, 129.5, 129.0, 128.8, 128.4, 128.4, 127.1, 123.7, 117.5, 116.5, 110.9, 35.0, 33.3, 31.7 ppm; **IR**:  $\bar{\nu}$  = 3085, 2960, 1572, 1328, 808  $\text{cm}^{-1}$ ; **HRMS** (ESI):  $m/z$  calcd for  $\text{C}_{25}\text{H}_{23}\text{BrO}_3\text{SK}$ : 521.0188; found: 521.0182  $[M + \text{K}]^+$ .

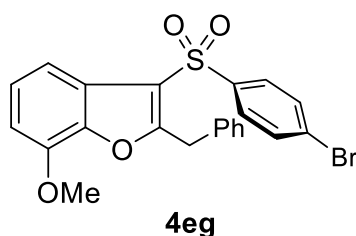

General procedure was followed, **4eg** (60.2 mg, 0.132 mmol) was from *o*-HBA **1e** (50.8 mg, 0.2 mmol) and **2g** (60.6 mg, 0.24 mmol), and purified using silica gel flash column chromatography [20:1 petroleum ether/EtOAc] under normal pressure condition.

**Compound 4eg**: (66% yield,  $R_f$  = 0.55 [10:1 petroleum ether/EtOAc], yellow solid,

mp. = 115.8 °C).

**<sup>1</sup>H NMR** (500 MHz, CDCl<sub>3</sub>)  $\delta$  = 7.62 (dd,  $J$  = 8.6, 1.5 Hz, 2H), 7.49 (dd,  $J$  = 8.6, 1.5 Hz, 2H), 7.43 – 7.40 (m, 1H), 7.29 (d,  $J$  = 6.3 Hz, 4H), 7.23 (dd,  $J$  = 8.0, 1.3 Hz, 2H), 6.83 (d,  $J$  = 8.0 Hz, 1H), 4.58 (d,  $J$  = 1.3 Hz, 2H), 3.96 ppm (s, 3H); **<sup>13</sup>C NMR** (126 MHz, CDCl<sub>3</sub>)  $\delta$  = 162.1, 145.3, 143.0, 141.1, 135.7, 132.4, 129.0, 128.8, 128.4, 128.3, 127.1, 125.7, 125.5, 117.8, 112.3, 107.8, 56.1, 33.2 ppm; **IR**:  $\bar{\nu}$  = 3090, 2922, 1571, 1273, 779 cm<sup>-1</sup>; **HRMS** (ESI):  $m/z$  calcd for C<sub>22</sub>H<sub>17</sub>Br<sub>1</sub>O<sub>4</sub>SNa: 478.9929; found: 478.9929 [ $M$  + Na]<sup>+</sup>.

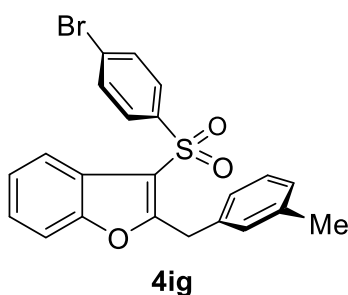

General procedure was followed, **4ig** (60.2 mg, 0.132 mmol) was from *o*-HBA **1i** (50.8 mg, 0.2 mmol) and **2g** (60.6 mg, 0.24 mmol), and purified using silica gel flash column chromatography [20:1 petroleum ether/EtOAc] under normal pressure condition.

**Compound 4ig**: (70% yield,  $R_f$  = 0.50 [10:1 petroleum ether/EtOAc], white solid, mp. = 120.8 °C).

**<sup>1</sup>H NMR** (500 MHz, CDCl<sub>3</sub>)  $\delta$  = 7.90 – 7.85 (m, 1H), 7.70 (d,  $J$  = 8.6 Hz, 2H), 7.53 (d,  $J$  = 8.6 Hz, 2H), 7.48 – 7.42 (m, 1H), 7.36 – 7.30 (m, 2H), 7.19 (t,  $J$  = 7.6 Hz, 1H), 7.12 – 7.00 (m, 3H), 4.52 (s, 2H), 2.28 ppm (s, 3H); **<sup>13</sup>C NMR** (126 MHz, CDCl<sub>3</sub>)  $\delta$  = 162.2, 153.5, 141.3, 138.5, 135.4, 132.4, 129.6, 128.7, 128.4, 128.3, 127.9, 126.1, 125.7, 124.6, 124.1, 120.4, 117.6, 111.7, 33.1, 21.3 ppm; **IR**:  $\bar{\nu}$  = 2924, 1728, 1276, 1150, 762 cm<sup>-1</sup>; **HRMS** (ESI):  $m/z$  calcd for C<sub>22</sub>H<sub>17</sub>BrO<sub>3</sub>SNa: 462.9979; found: 462.9937 [ $M$  + Na]<sup>+</sup>.



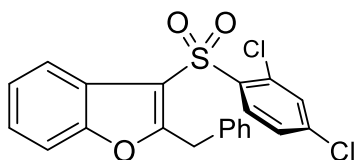

**4ah**

General procedure was followed, **4ah** (47.4 mg, 0.114 mmol) was from *o*-HBA **1a** (44.8 mg, 0.2 mmol) and **2h** (61.44 mg, 0.24 mmol), and purified using silica gel flash column chromatography [20:1 petroleum ether/EtOAc] under normal pressure condition.

**Compound 4ah:** (57% yield, *R<sub>f</sub>* = 0.51 [10:1 petroleum ether/EtOAc], off white solid, mp. = 105.5 °C).

**<sup>1</sup>H NMR** (500 MHz, CDCl<sub>3</sub>) δ = 8.36 (d, *J* = 8.5 Hz, 1H), 7.58 (d, *J* = 7.8 Hz, 1H), 7.48 – 7.38 (m, 4H), 7.36 – 7.26 (m, 5H), 7.23 (m, 1H), 4.58 ppm (s, 2H). **<sup>13</sup>C NMR** (126 MHz, CDCl<sub>3</sub>) δ = 163.4, 153.4, 140.5, 137.4, 135.2, 134.2, 131.8, 131.7, 129.1, 128.7, 127.6, 127.1, 125.5, 124.4, 124.0, 120.2, 115.6, 111.6, 33.6 ppm; **IR:**  $\bar{\nu}$  = 2924, 1565, 1453, 1157, 754 cm<sup>-1</sup>; **HRMS** (ESI): *m/z* calcd for C<sub>21</sub>H<sub>14</sub>ClO<sub>3</sub>SNa: 438.9938; found: 438.9925 [*M* + Na]<sup>+</sup>.

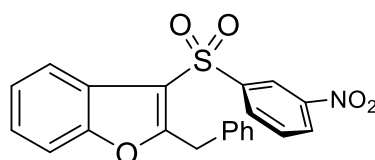

**4ai**

General procedure was followed, **4ai** (35.60 mg, 0.092 mmol) was from *o*-HBA **1a** (44.8 mg, 0.2 mmol) and **2i** (61.44 mg, 0.24 mmol), and purified using silica gel flash column chromatography [20:1 petroleum ether/EtOAc] under normal pressure condition.

**Compound 4ai:** (45% yield, *R<sub>f</sub>* = 0.52 [10:1 petroleum ether/EtOAc], off white solid, mp. = 117.3 °C).

**<sup>1</sup>H NMR** (500 MHz, CDCl<sub>3</sub>) δ = 8.69 (s, 1H), 8.33 (d, *J* = 8.3, 2.2 Hz, 1H), 8.09 (d, *J* = 7.8 Hz, 1H), 7.91 – 7.87 (m, 1H), 7.58 (m, 1H), 7.50 – 7.46 (m, 1H), 7.39 – 7.35 (m, 2H), 7.32 – 7.26 (m, 4H), 7.24 (m, 1H), 4.61 (s, 2H); **<sup>13</sup>C NMR** (126 MHz, CDCl<sub>3</sub>) δ

= 163.0, 153.5, 148.2, 144.1, 135.2, 132.2, 130.5, 128.9, 128.9, 127.7, 127.3, 126.0, 125.0, 123.8, 122.1, 120.2, 116.6, 111.8, 33.3 ppm; **IR**:  $\bar{\nu}$  = 3069, 1567, 1356, 1160, 746  $\text{cm}^{-1}$ ; **HRMS** (ESI):  $m/z$  calcd for  $\text{C}_{21}\text{H}_{15}\text{NO}_5\text{SNa}$ : 416.0569; found: 416.0494 [ $M + \text{Na}$ ]<sup>+</sup>.

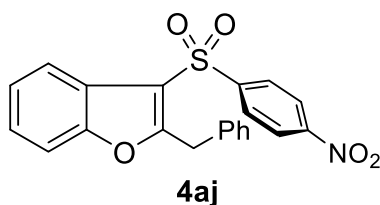

General procedure was followed, **4aj** (37.7 mg, 0.096 mmol) was from *o*-HBA **1a** (44.8 mg, 0.2 mmol) and **2j** (55.44 mg, 0.24 mmol), and purified using silica gel flash column chromatography [20:1 petroleum ether/EtOAc] under normal pressure condition.

**Compound 4aj**: (48% yield,  $R_f$  = 0.50 [10:1 petroleum ether/EtOAc], off white solid, mp. = 146.3 °C)

<sup>1</sup>H NMR (500 MHz,  $\text{CDCl}_3$ )  $\delta$  = 8.19 (d,  $J$  = 8.8 Hz, 2H), 7.94 (d,  $J$  = 8.8 Hz, 2H), 7.89 – 7.85 (m, 1H), 7.51 – 7.46 (m, 1H), 7.38 – 7.35 (m, 2H), 7.29 (s, 5H), 4.59 ppm (s, 2H); <sup>13</sup>C NMR (126 MHz,  $\text{CDCl}_3$ )  $\delta$  = 163.1, 153.5, 150.3, 147.5, 135.3, 129.0, 128.9, 128.0, 127.4, 126.0, 124.9, 124.4, 123.8, 120.2, 116.6, 111.8, 33.3 ppm; **IR**:  $\bar{\nu}$  = 3267, 1560, 1389, 1155, 750  $\text{cm}^{-1}$ ; **HRMS** (ESI):  $m/z$  calcd for  $\text{C}_{21}\text{H}_{15}\text{NO}_5\text{SNa}$ : 416.0569; found: 461.0589 [ $M + \text{Na}$ ]<sup>+</sup>

## 5. General Procedure for the Synthesis of Functionalized derivatives 5, 6 and 7.

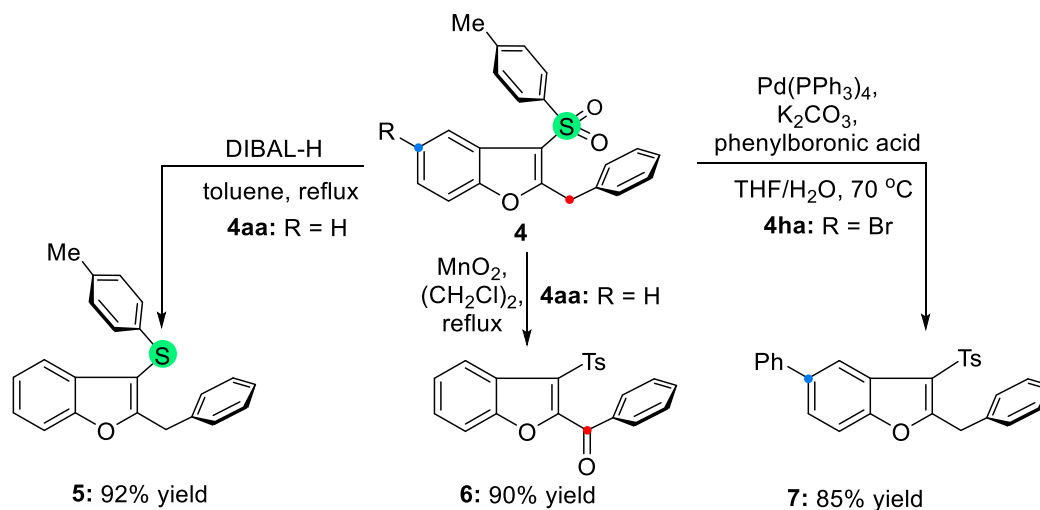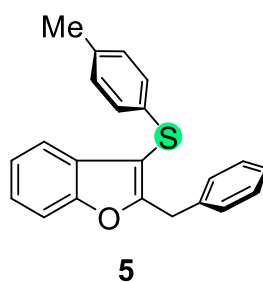

Under nitrogen atmosphere, compound **4aa** (36.2 mg, 0.1 mmol) was added to a 15 mL Schlenk tube, then added 2 mL toluene and 0.3 mL DIBAL-H. The solution was refluxed under a nitrogen atmosphere until the **3aa** was disappeared. The reaction mixture was poured into aqueous ammonium chloride and extracted with EtOAc. The combined organic layers were washed with a saturated salt solution, dried with magnesium sulfate, and evaporated. The residue was purified by chromatography to brown oil **5** (30.3 mg, 0.09 mmol).

**Compound 5:** (92% yield, *R<sub>f</sub>* = 0.58 [10:1 petroleum ether/EtOAc], brown oil).

<sup>1</sup>H NMR (500 MHz, CDCl<sub>3</sub>) δ = 7.46 (d, *J* = 7.4 Hz, 1H), 7.42 – 7.34 (m, 3H), 7.31 (m, 3H), 7.23 – 7.14 (m, 3H), 7.10 (d, *J* = 7.9 Hz, 2H), 6.36 (d, *J* = 7.3 Hz, 1H), 4.11 (s, 2H), 2.31 ppm (s, 3H); <sup>13</sup>C NMR (126 MHz, CDCl<sub>3</sub>) δ = 157.8, 155.0, 137.5,

137.3, 134.0, 129.8, 128.9, 128.6, 128.6, 126.8, 123.4, 122.5, 120.4, 110.9, 103.4, 35.0, 21.1 ppm; **IR**:  $\bar{\nu}$  = 2922, 1454, 1253, 803, 750, 703  $\text{cm}^{-1}$ ; **HRMS** (ESI):  $m/z$  calcd for  $\text{C}_{22}\text{H}_{18}\text{OSH}$ : 331.1162; found: 331.1155  $[\text{M} + \text{H}]^+$

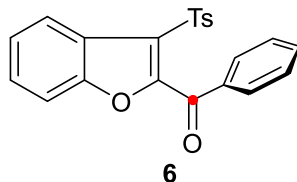

Compound **4aa** (36.2 mg, 0.1 mmol),  $\text{MnO}_2$  (260mg, 0.3 mmol) was added to a 15 mL Schlenk tube, then added 2 mL DCE. The solution was refluxed until the **3aa** was disappeared. The solvent was removed under reduced pressure, and the residue was purified by silica gel chromatography (ethyl acetate/petroleum ether) to give **6** (33.3 mg, 0.09 mmol).

**Compound 6**: (90% yield,  $R_f$  = 0.49 [10:1 petroleum ether/EtOAc], off brown solid, mp. = 114.8  $^{\circ}\text{C}$ ).

**$^1\text{H}$  NMR** (500 MHz,  $\text{CDCl}_3$ )  $\delta$  = 8.21 (dd,  $J$  = 8.1, 1.5 Hz, 1H), 8.12 (d,  $J$  = 8.4 Hz, 2H), 7.97 – 7.91 (m, 2H), 7.70 – 7.64 (m, 1H), 7.58 – 7.44 (m, 5H), 7.34 (d,  $J$  = 8.0 Hz, 2H), 2.41 ppm (s, 3H);  **$^{13}\text{C}$  NMR** (126 MHz,  $\text{CDCl}_3$ )  $\delta$  = 184.7, 153.7, 152.8, 144.8, 138.2, 135.6, 134.5, 130.3, 129.8, 128.8, 128.2, 127.8, 125.5, 125.4, 123.7, 122.3, 112.4, 21.7 ppm; **IR**:  $\bar{\nu}$  = 2962, 1668, 1471, 1258, 798, 672  $\text{cm}^{-1}$ ; **HRMS** (ESI):  $m/z$  calcd for  $\text{C}_{22}\text{H}_{16}\text{O}_4\text{SNa}$ : 399.0667; found: 399.0619  $[\text{M} + \text{Na}]^+$ .

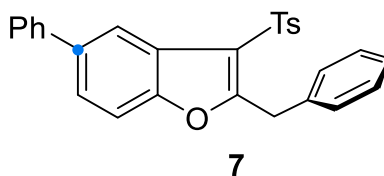

Under nitrogen atmosphere, compound **4ha** (25.0 mg, 0.06 mmol), phenylboronic acid (14.6 mg, 2.0 equiv),  $\text{K}_2\text{CO}_3$  (24 mg, 3.0 equiv),  $\text{Pd}(\text{PPh}_3)_4$  (6.9 mg, 0.10 equiv), were successively added to a 15 mL Schlenk tube, followed by the addition of 2.0 mL of THF and 0.2 mL  $\text{H}_2\text{O}$ , the mixture was degassed and purged with  $\text{N}_2$  and then heated to 70  $^{\circ}\text{C}$  for 6 h. After cooling to 25  $^{\circ}\text{C}$ , the solvent was removed and purified by chromatography to a white solid **7** (26.4 mg, 0.051 mmol).

**Compound 7**: (85% yield,  $R_f$  = 0.54 [10:1 petroleum ether/EtOAc], off white solid, mp. = 122.5  $^{\circ}\text{C}$ ).

**<sup>1</sup>H NMR** (500 MHz, CDCl<sub>3</sub>)  $\delta$  = 8.06 (d,  $J$  = 2.1 Hz, 1H), 7.82 – 7.77 (m, 2H), 7.59 (d,  $J$  = 7.6 Hz, 2H), 7.52 (d,  $J$  = 8.5 Hz, 1H), 7.46 (t,  $J$  = 7.4 Hz, 3H), 7.32 (m, 6H), 7.22 (d,  $J$  = 7.9 Hz, 2H), 4.59 (s, 2H), 2.36 ppm (s, 3H); **<sup>13</sup>C NMR** (126 MHz, CDCl<sub>3</sub>)  $\delta$  = 162.0, 153.1, 144.3, 141.0, 139.4, 138.2, 135.8, 129.9, 129.1, 128.8, 128.7, 127.6, 127.3, 127.1, 126.9, 125.2, 124.8, 116.0, 119.0, 118.6, 33.3, 21.5 ppm; **IR**:  $\bar{\nu}$  = 3056, 1492, 1323, 1150, 815 cm<sup>-1</sup>; **HRMS** (ESI):  $m/z$  calcd for C<sub>28</sub>H<sub>22</sub>O<sub>3</sub>SNa: 461.1187; found: 461.1158 [ $M + Na$ ]<sup>+</sup>.

## 6. Relative Configuration Assignment of 3aa, 4aa, and 4ha' by X-Ray Crystallographic Analysis

The single crystal of **3aa** which was used for the determination of its relative configurations via X-ray crystallography (see below), was recrystallized from ethyl acetate and petroleum ether. The intensity data were collected using graphite-monochromated Mo K $\alpha$  radiation.

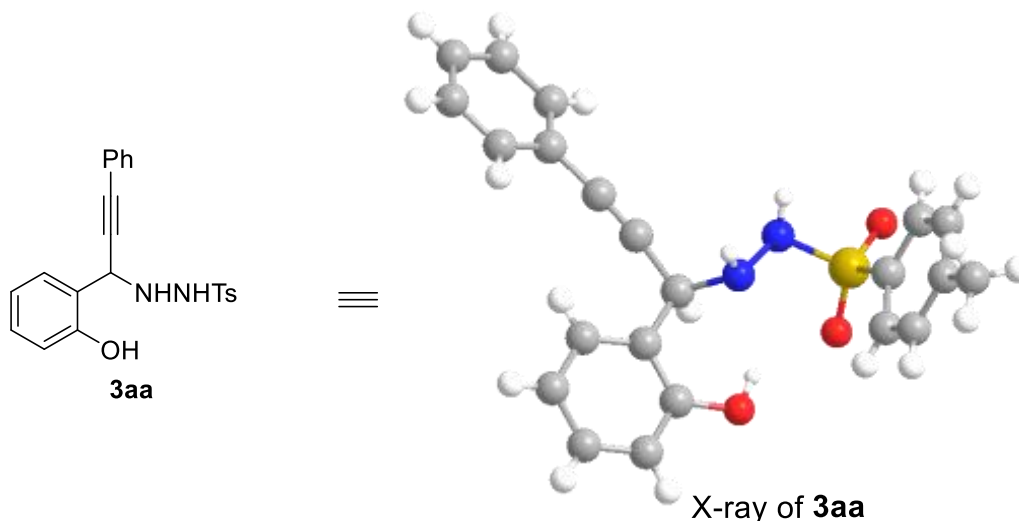

**Table 2 Crystal data and structure refinement for 3aa.**

|                     |                                                                 |
|---------------------|-----------------------------------------------------------------|
| CCDC number         | 1942386                                                         |
| Identification code | <b>3aa</b>                                                      |
| Empirical formula   | C <sub>22</sub> H <sub>20</sub> N <sub>2</sub> O <sub>3</sub> S |
| Formula weight      | 392.46                                                          |
| Temperature/K       | 293(2)                                                          |
| Crystal system      | monoclinic                                                      |

|                                             |                                                               |
|---------------------------------------------|---------------------------------------------------------------|
| Space group                                 | P2 <sub>1</sub> /c                                            |
| a/Å                                         | 20.9823(17)                                                   |
| b/Å                                         | 5.1771(3)                                                     |
| c/Å                                         | 18.9441(15)                                                   |
| α/°                                         | 90                                                            |
| β/°                                         | 105.594(3)                                                    |
| γ/°                                         | 90                                                            |
| Volume/Å <sup>3</sup>                       | 1982.1(3)                                                     |
| Z                                           | 4                                                             |
| ρ <sub>calc</sub> /cm <sup>3</sup>          | 1.315                                                         |
| μ/mm <sup>-1</sup>                          | 1.659                                                         |
| F(000)                                      | 824.0                                                         |
| Crystal size/mm <sup>3</sup>                | 0.37 × 0.08 × 0.04                                            |
| Radiation                                   | CuKα (λ = 1.54178)                                            |
| 2θ range for data collection/°              | 8.75 to 132.092                                               |
| Index ranges                                | -24 ≤ h ≤ 22, -6 ≤ k ≤ 5, -22 ≤ l ≤ 22                        |
| Reflections collected                       | 6252                                                          |
| Independent reflections                     | 3449 [R <sub>int</sub> = 0.0466, R <sub>sigma</sub> = 0.0761] |
| Data/restraints/parameters                  | 3449/0/254                                                    |
| Goodness-of-fit on F <sup>2</sup>           | 1.000                                                         |
| Final R indexes [I ≥ 2σ (I)]                | R <sub>1</sub> = 0.0566, wR <sub>2</sub> = 0.1067             |
| Final R indexes [all data]                  | R <sub>1</sub> = 0.1095, wR <sub>2</sub> = 0.1292             |
| Largest diff. peak/hole / e Å <sup>-3</sup> | 0.20/-0.24                                                    |

---



---

The single crystal of **4aa** which was used for the determination of its relative configurations via X-ray crystallography (see below), was recrystallized from ethyl acetate and petroleum ether. The intensity data were collected using graphite-monochromated Mo Kα radiation.

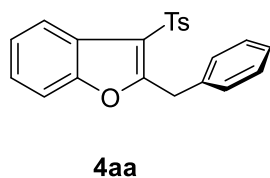

≡

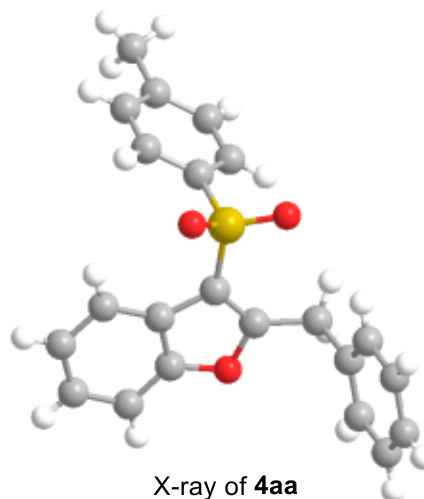

**Table 3 Crystal data and structure refinement for 4aa.**

|                                                |                                                                  |
|------------------------------------------------|------------------------------------------------------------------|
| CCDC number                                    | 1942385                                                          |
| Identification code                            | <b>4aa</b>                                                       |
| Empirical formula                              | $C_{22}H_{18}O_3S$                                               |
| Formula weight                                 | 362.42                                                           |
| Temperature/K                                  | 298(2)                                                           |
| Crystal system                                 | monoclinic                                                       |
| Space group                                    | $P2_1/n$                                                         |
| a/Å                                            | 10.6861(9)                                                       |
| b/Å                                            | 9.7446(7)                                                        |
| c/Å                                            | 18.3414(15)                                                      |
| $\alpha/^\circ$                                | 90                                                               |
| $\beta/^\circ$                                 | 105.015(3)                                                       |
| $\gamma/^\circ$                                | 90                                                               |
| Volume/Å <sup>3</sup>                          | 1844.7(3)                                                        |
| Z                                              | 4                                                                |
| $\rho_{\text{calc}}/\text{cm}^3$               | 1.305                                                            |
| $\mu/\text{mm}^{-1}$                           | 0.194                                                            |
| F(000)                                         | 760.0                                                            |
| Crystal size/mm <sup>3</sup>                   | 0.4 × 0.3 × 0.22                                                 |
| Radiation                                      | MoK $\alpha$ ( $\lambda = 0.71073$ )                             |
| 2 $\theta$ range for data collection/ $^\circ$ | 5.75 to 50.04                                                    |
| Index ranges                                   | -12 ≤ h ≤ 11, -11 ≤ k ≤ 8, -19 ≤ l ≤ 21                          |
| Reflections collected                          | 8948                                                             |
| Independent reflections                        | 3243 [ $R_{\text{int}} = 0.0329$ , $R_{\text{sigma}} = 0.0383$ ] |
| Data/restraints/parameters                     | 3243/0/236                                                       |
| Goodness-of-fit on $F^2$                       | 1.009                                                            |
| Final R indexes [ $I \geq 2\sigma(I)$ ]        | $R_1 = 0.0423$ , $wR_2 = 0.0993$                                 |

|                                                |                                  |
|------------------------------------------------|----------------------------------|
| Final R indexes [all data]                     | $R_1 = 0.0665$ , $wR_2 = 0.1121$ |
| Largest diff. peak/hole / $e \text{ \AA}^{-3}$ | 0.18/-0.38                       |

---

The single crystal of **4ha'** which was used for the determination of its relative configurations via X-ray crystallography (see below), was recrystallized from ethyl acetate and petroleum ether. The intensity data were collected using graphite-monochromated Mo  $K\alpha$  radiation.

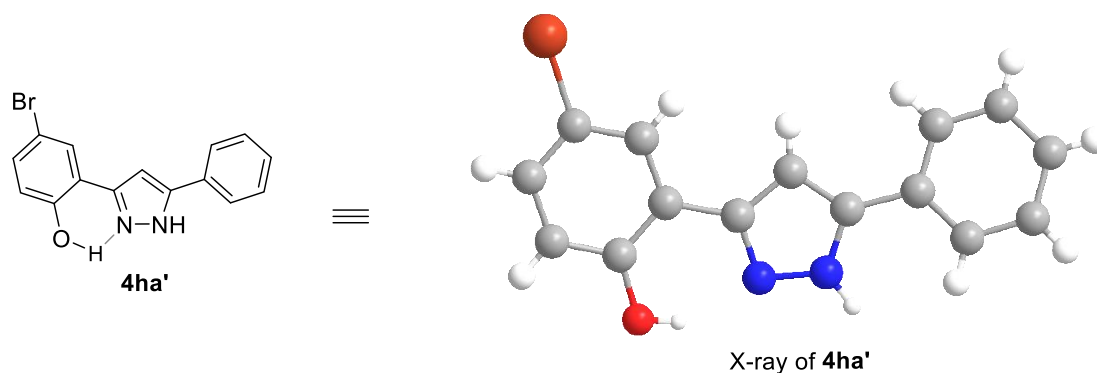

**Table 4 Crystal data and structure refinement for 4ha'.**

|                                  |                               |
|----------------------------------|-------------------------------|
| CCDC number                      | 1942384                       |
| Identification code              | <b>4ha'</b>                   |
| Empirical formula                | $C_{15}H_{11}BrN_2O$          |
| Formula weight                   | 315.17                        |
| Temperature/K                    | 298(2)                        |
| Crystal system                   | monoclinic                    |
| Space group                      | $P2_1/c$                      |
| $a/\text{\AA}$                   | 3.9930(2)                     |
| $b/\text{\AA}$                   | 12.1484(11)                   |
| $c/\text{\AA}$                   | 26.691(2)                     |
| $\alpha/^\circ$                  | 90.00                         |
| $\beta/^\circ$                   | 91.442(2)                     |
| $\gamma/^\circ$                  | 90.00                         |
| Volume/ $\text{\AA}^3$           | 1294.35(17)                   |
| Z                                | 4                             |
| $\rho_{\text{calc}}/\text{cm}^3$ | 1.617                         |
| $\mu/\text{mm}^{-1}$             | 3.168                         |
| F(000)                           | 632.0                         |
| Crystal size/ $\text{mm}^3$      | $0.4 \times 0.08 \times 0.05$ |



|                                                  |                                                                  |
|--------------------------------------------------|------------------------------------------------------------------|
| Radiation                                        | MoK $\alpha$ ( $\lambda = 0.71073$ )                             |
| 2 $\Theta$ range for data collection/ $^{\circ}$ | 4.54 to 50.02                                                    |
| Index ranges                                     | $-4 \leq h \leq 4$ , $-11 \leq k \leq 14$ , $-31 \leq l \leq 30$ |
| Reflections collected                            | 6312                                                             |
| Independent reflections                          | 2282 [ $R_{\text{int}} = 0.0550$ , $R_{\text{sigma}} = 0.0601$ ] |
| Data/restraints/parameters                       | 2282/0/172                                                       |
| Goodness-of-fit on $F^2$                         | 1.012                                                            |
| Final R indexes [ $I \geq 2\sigma(I)$ ]          | $R_1 = 0.0435$ , $wR_2 = 0.0908$                                 |
| Final R indexes [all data]                       | $R_1 = 0.0744$ , $wR_2 = 0.0956$                                 |
| Largest diff. peak/hole / $e \text{ \AA}^{-3}$   | 0.66/-0.22                                                       |

---

## 7. References

1. a) Saha, S.; Schneider, C. *Org. Lett.* **2015**, *17*, 648. b) Rajesh, M.; Thirupathi, N.; Jagadeshwar Reddy, T.; Kanojiya, S.; Sridhar Reddy, M., *J. Org. Chem.* **2015**, *80*, 12311c) Ranjith Kumar, G.; Kiran Kumar, Y.; Kant, R.; Sridhar Reddy, M., *Org. Biomol. Chem.* **2016**, *14*, 4077 d) Harkat, H.; Blanc, A.; Weibel, J.-M.; Pale, P *J. Org. Chem.* **2008**, *73*, 1620. e) Yoshida, M.; Fujino, Y.; Doi, T. *Org. Lett.* **2011**, *13*, 4526. f) Tian, T.; Li, L.; Xue, J.; Zhang, J.; Li, Y. *J. Org. Chem.* **2015**, *80*, 4189. g) Du, J.-Y.; Ma, Y.-H.; Meng, F.-X.; Chen, B.-L.; Zhang, S.-L.; Li, Q.-L.; Gong, S.-W.; Wang, D.-Q.; Ma, C.-L. *Org. Lett.* **2018**, *20*, 4371-4374. h) Du, J.-Y.; Ma, Y.-H.; Yuan, R.-Q.; Xin, N.; Nie, S.-Z.; Ma, C.-L.; Li, C.-Z.; Zhao, C.-Q. *Org. Lett.* **2018**, *20*, 477-480.
2. Yang, F.-L.; Ma, X.-T.; Tian, S.-K., *Chem. Eur. J.* **2012**, *18*, 1582.

## 8. Copies of NMR Spectra

# <sup>1</sup>H NMR Spectroscopy of 4aa

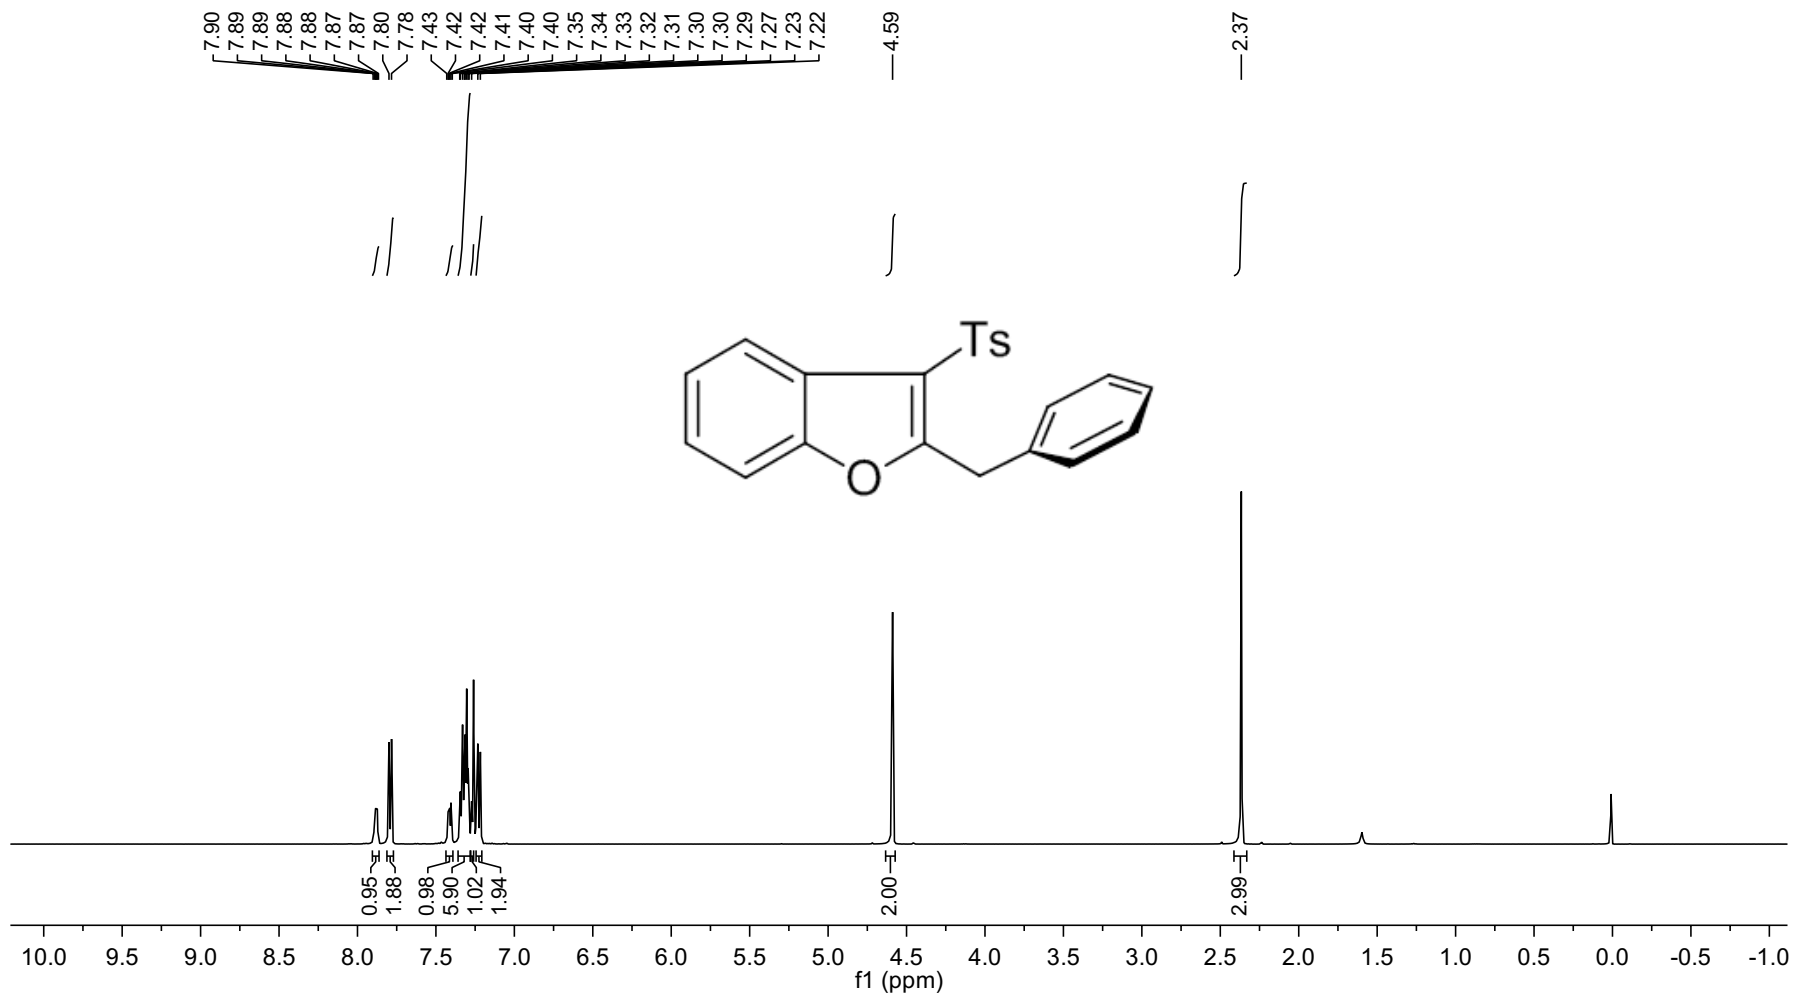

# $^{13}\text{C}$ NMR Spectroscopy of 4aa

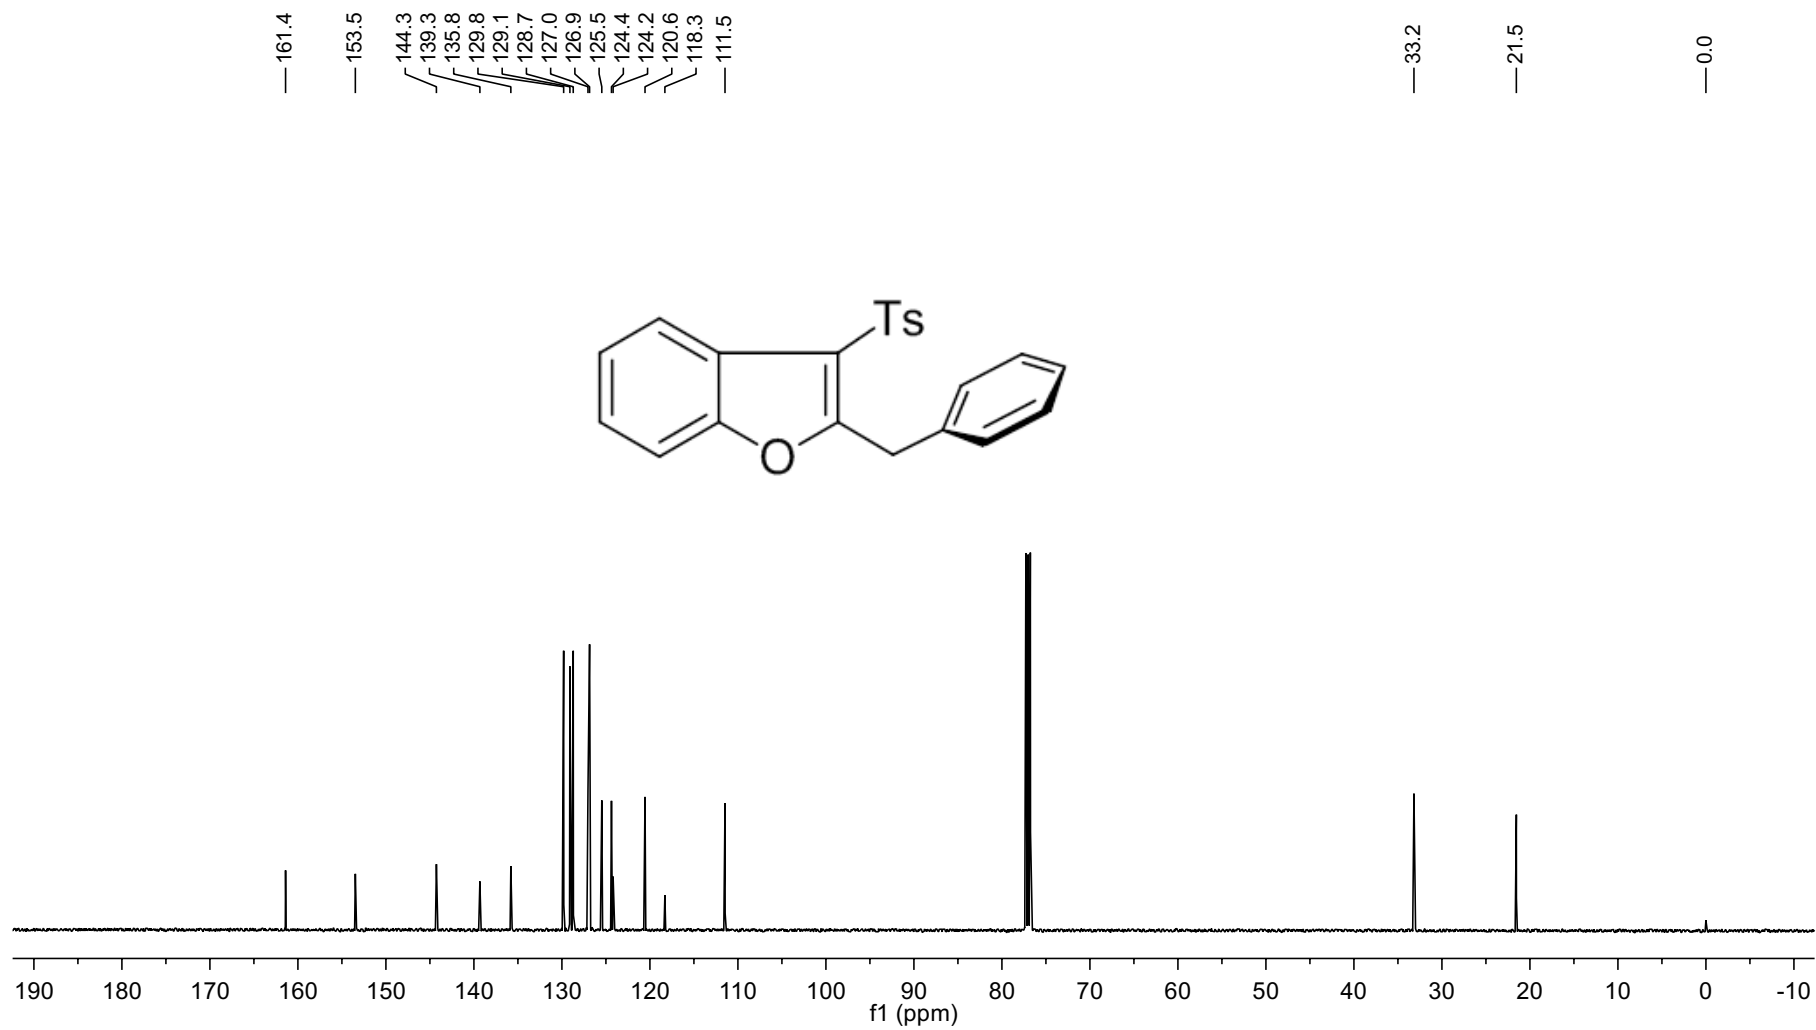

# $^1\text{H}$ NMR Spectroscopy of 4aa'

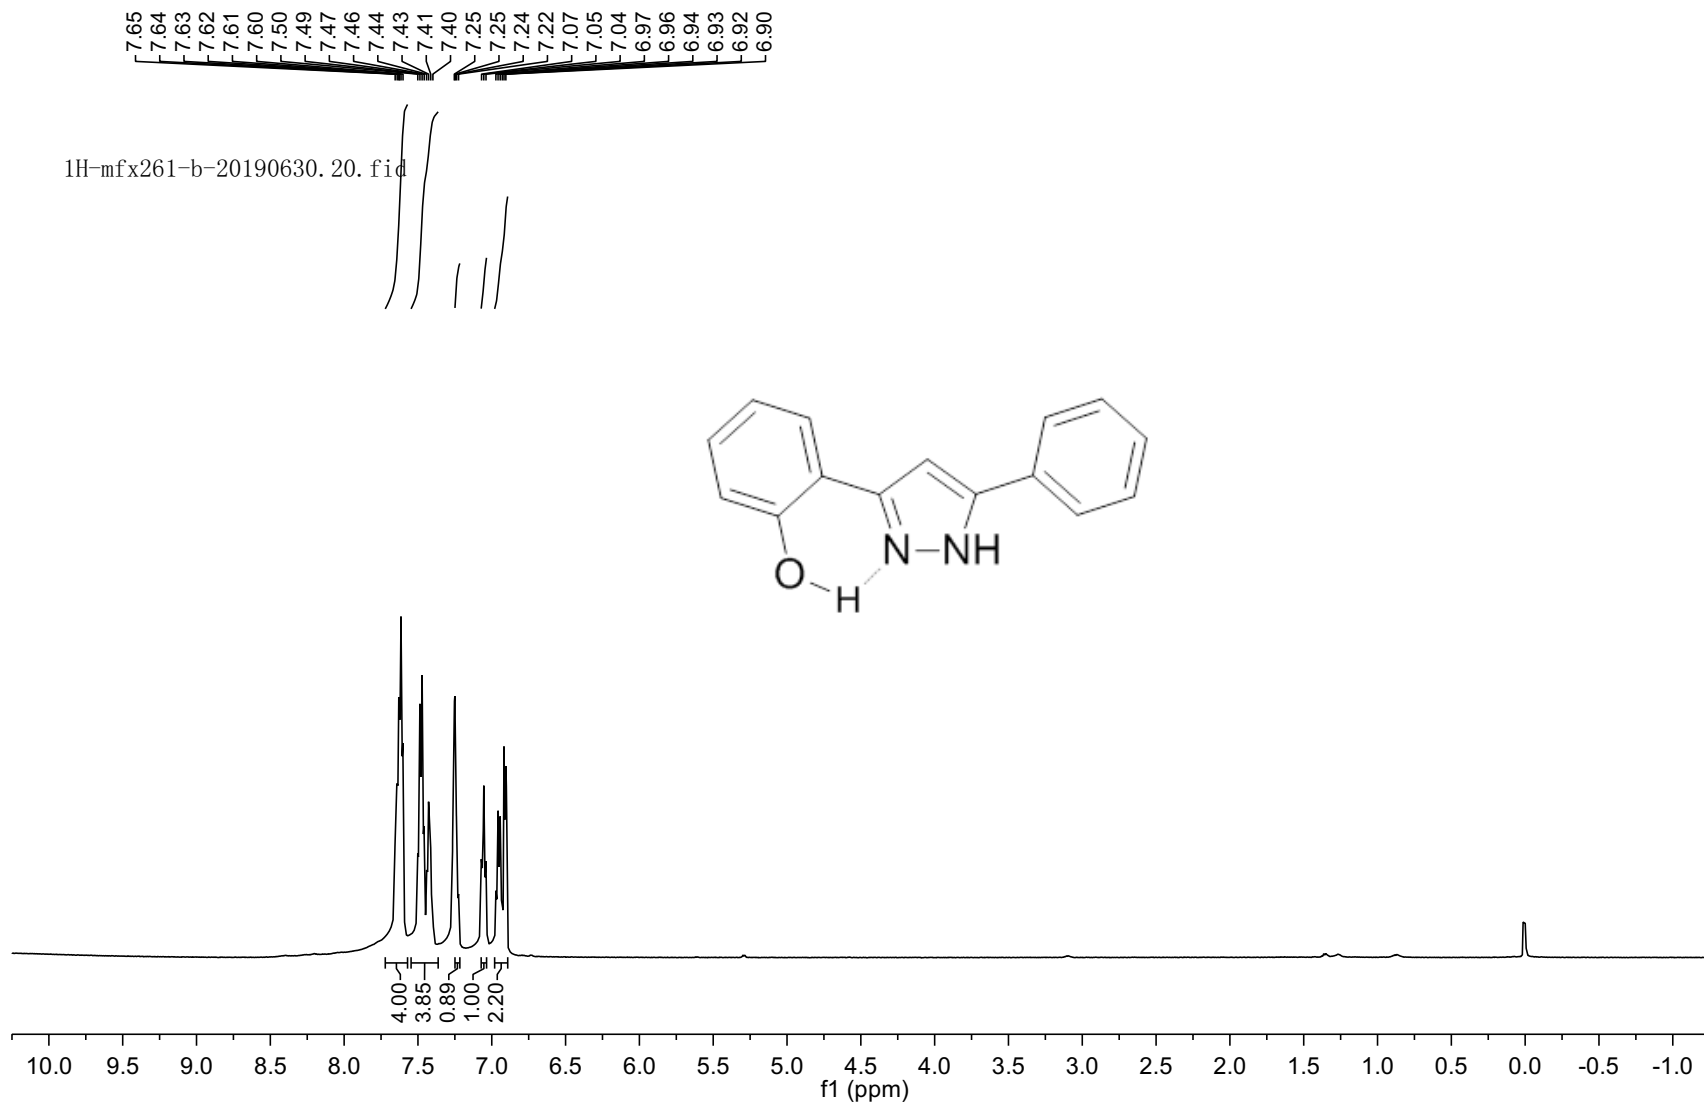

# $^{13}\text{C}$ NMR Spectroscopy of 4aa'

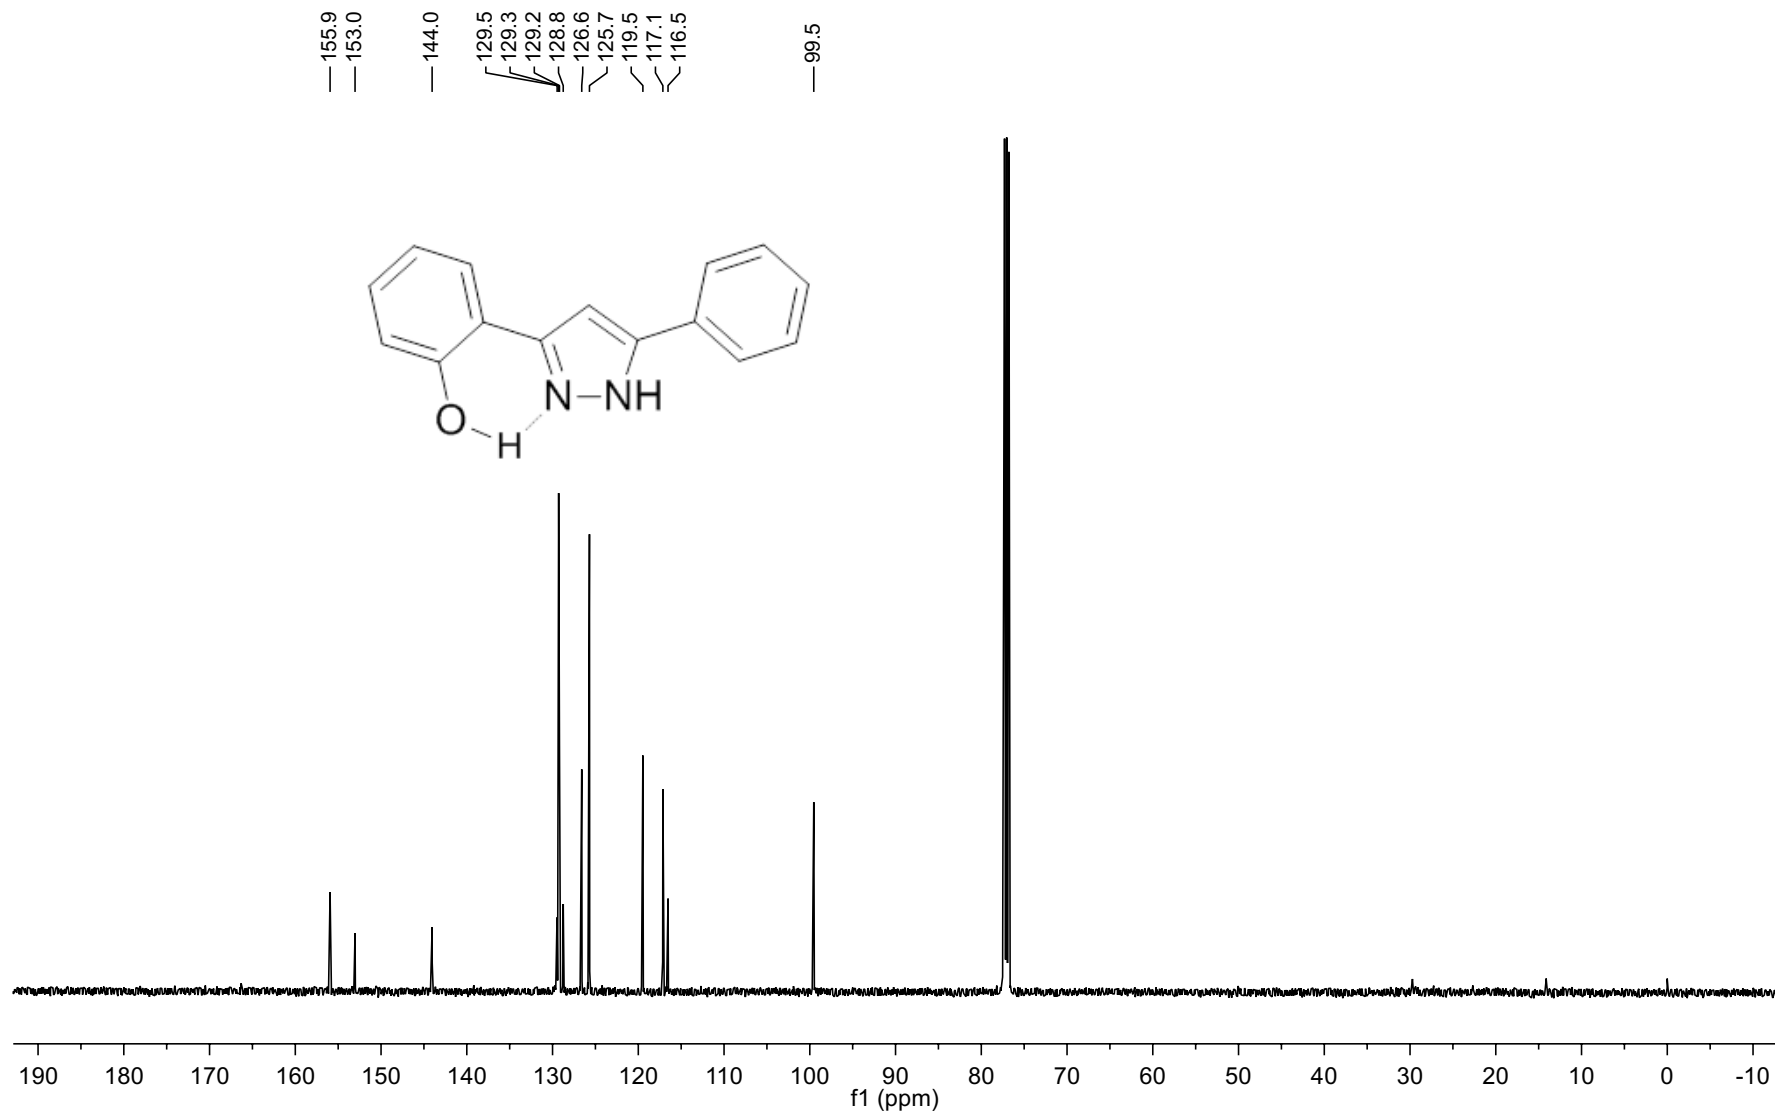

# $^1\text{H}$ NMR Spectroscopy of **3aa**

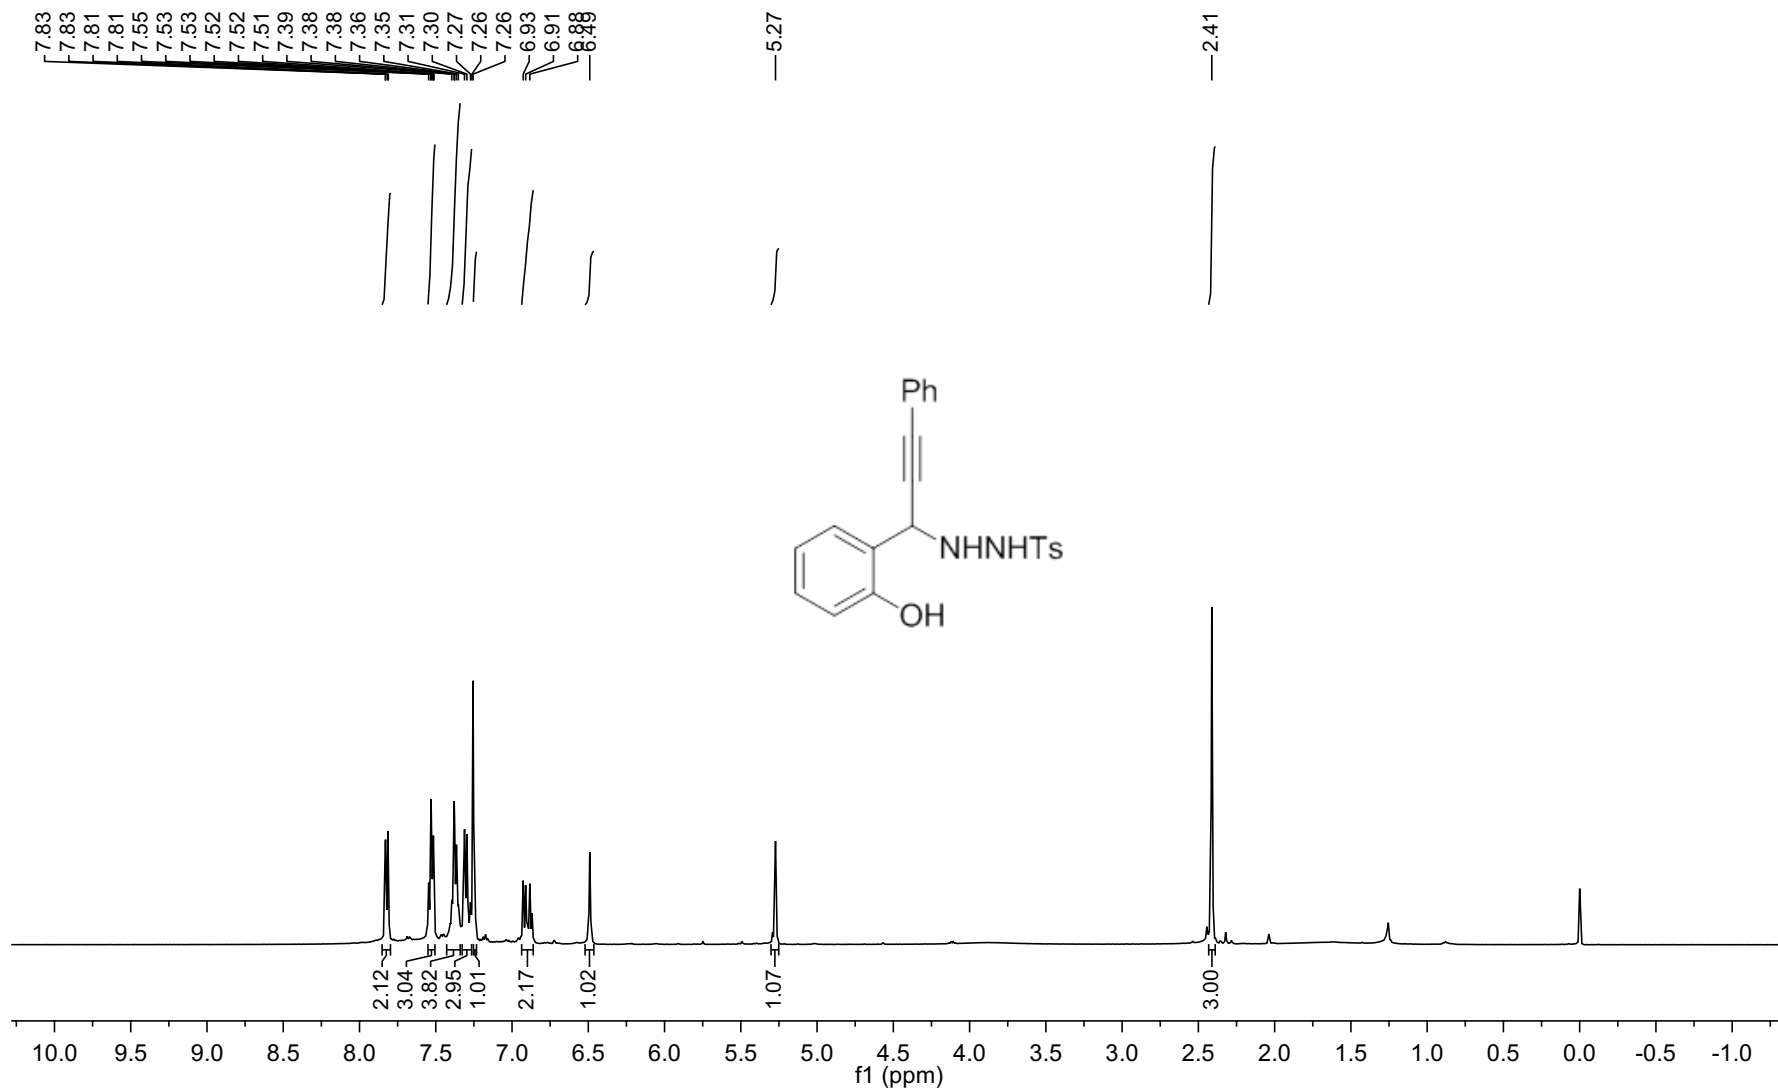

# $^{13}\text{C}$ NMR Spectroscopy of **3aa**

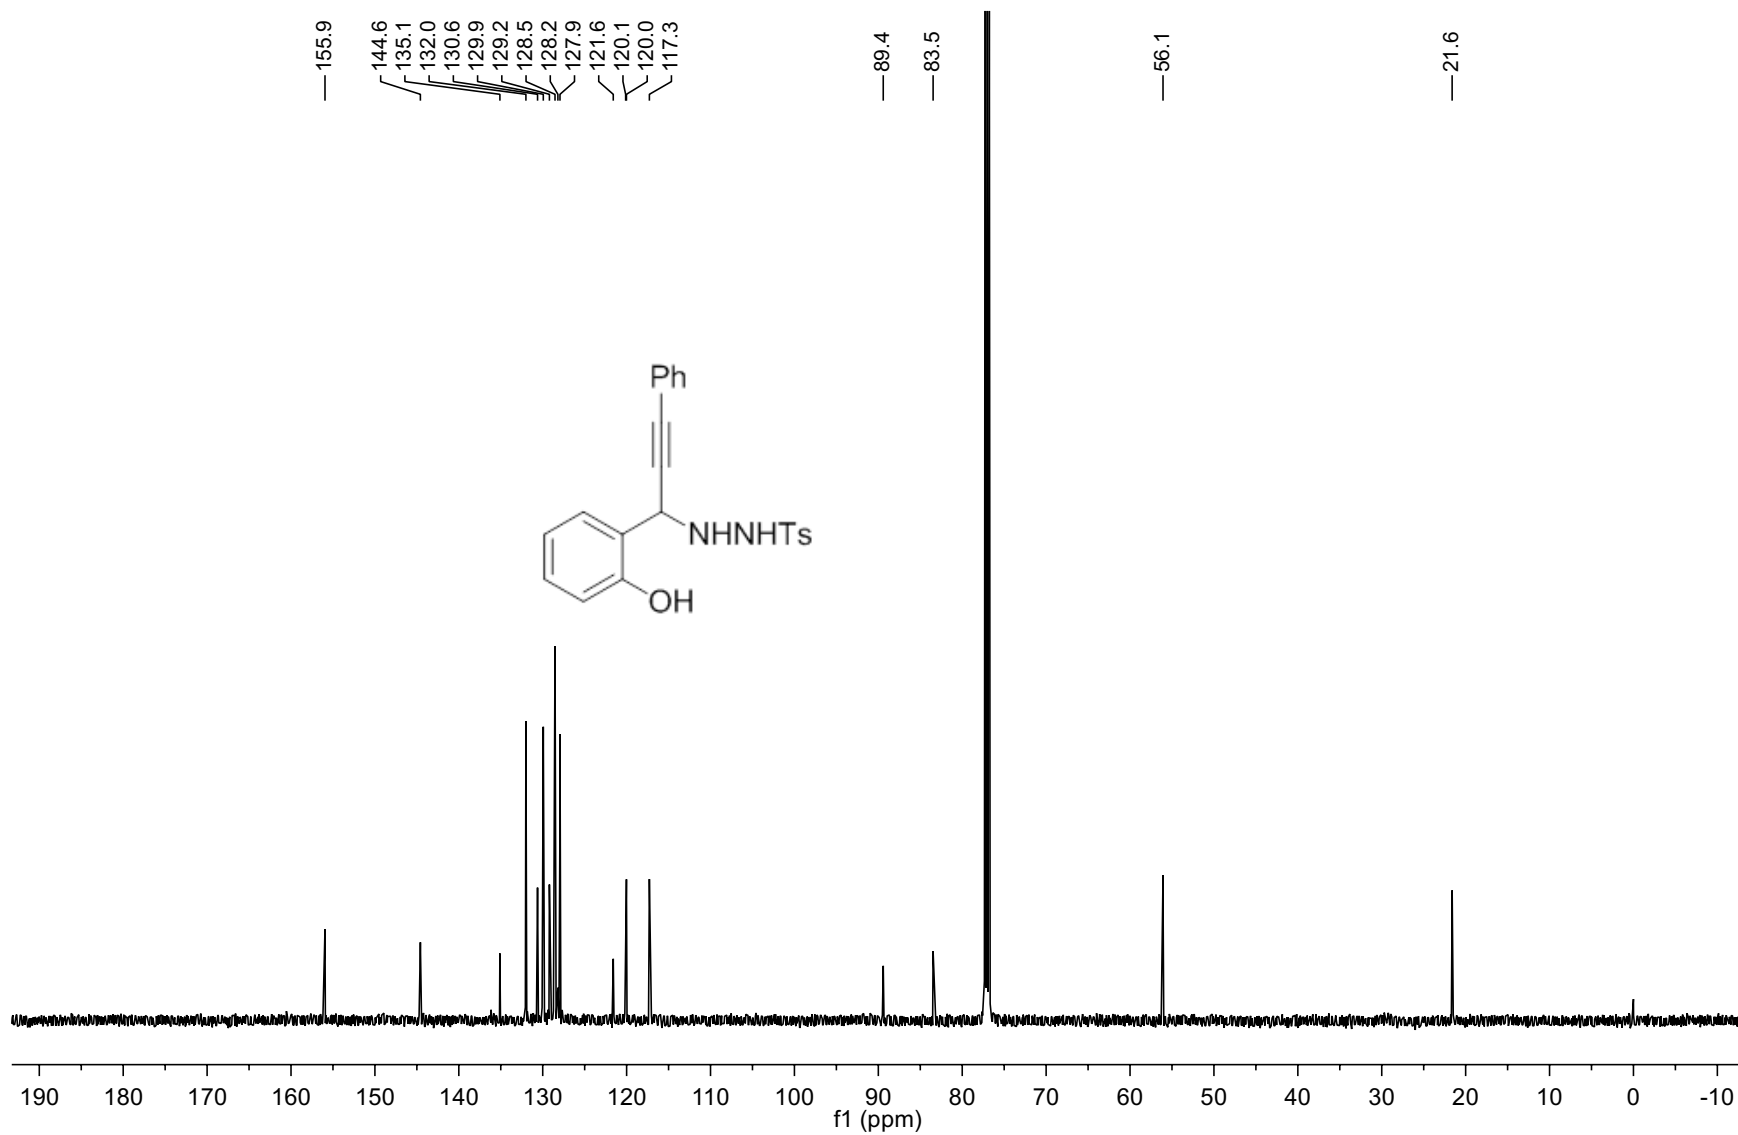

# $^1\text{H}$ NMR Spectroscopy of **4ba**

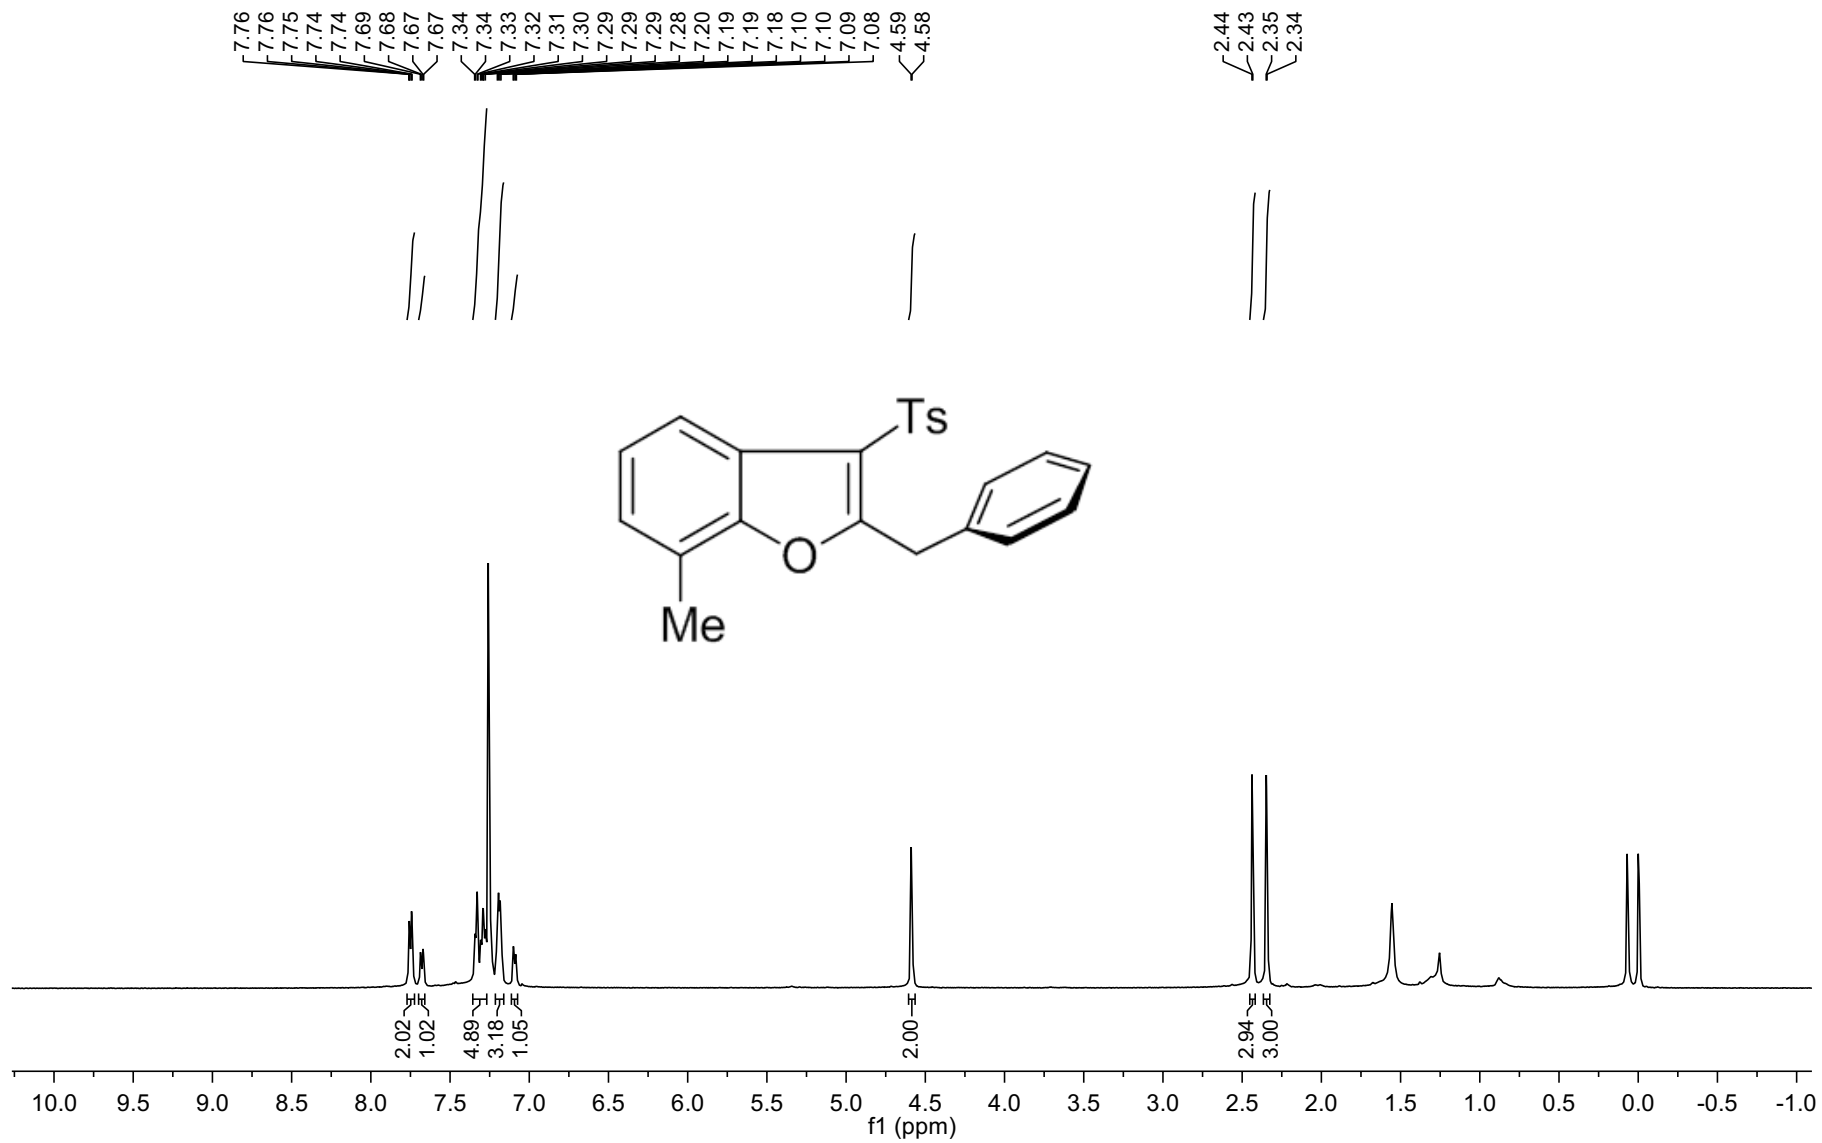



# $^{13}\text{C}$ NMR Spectroscopy of **4ba**

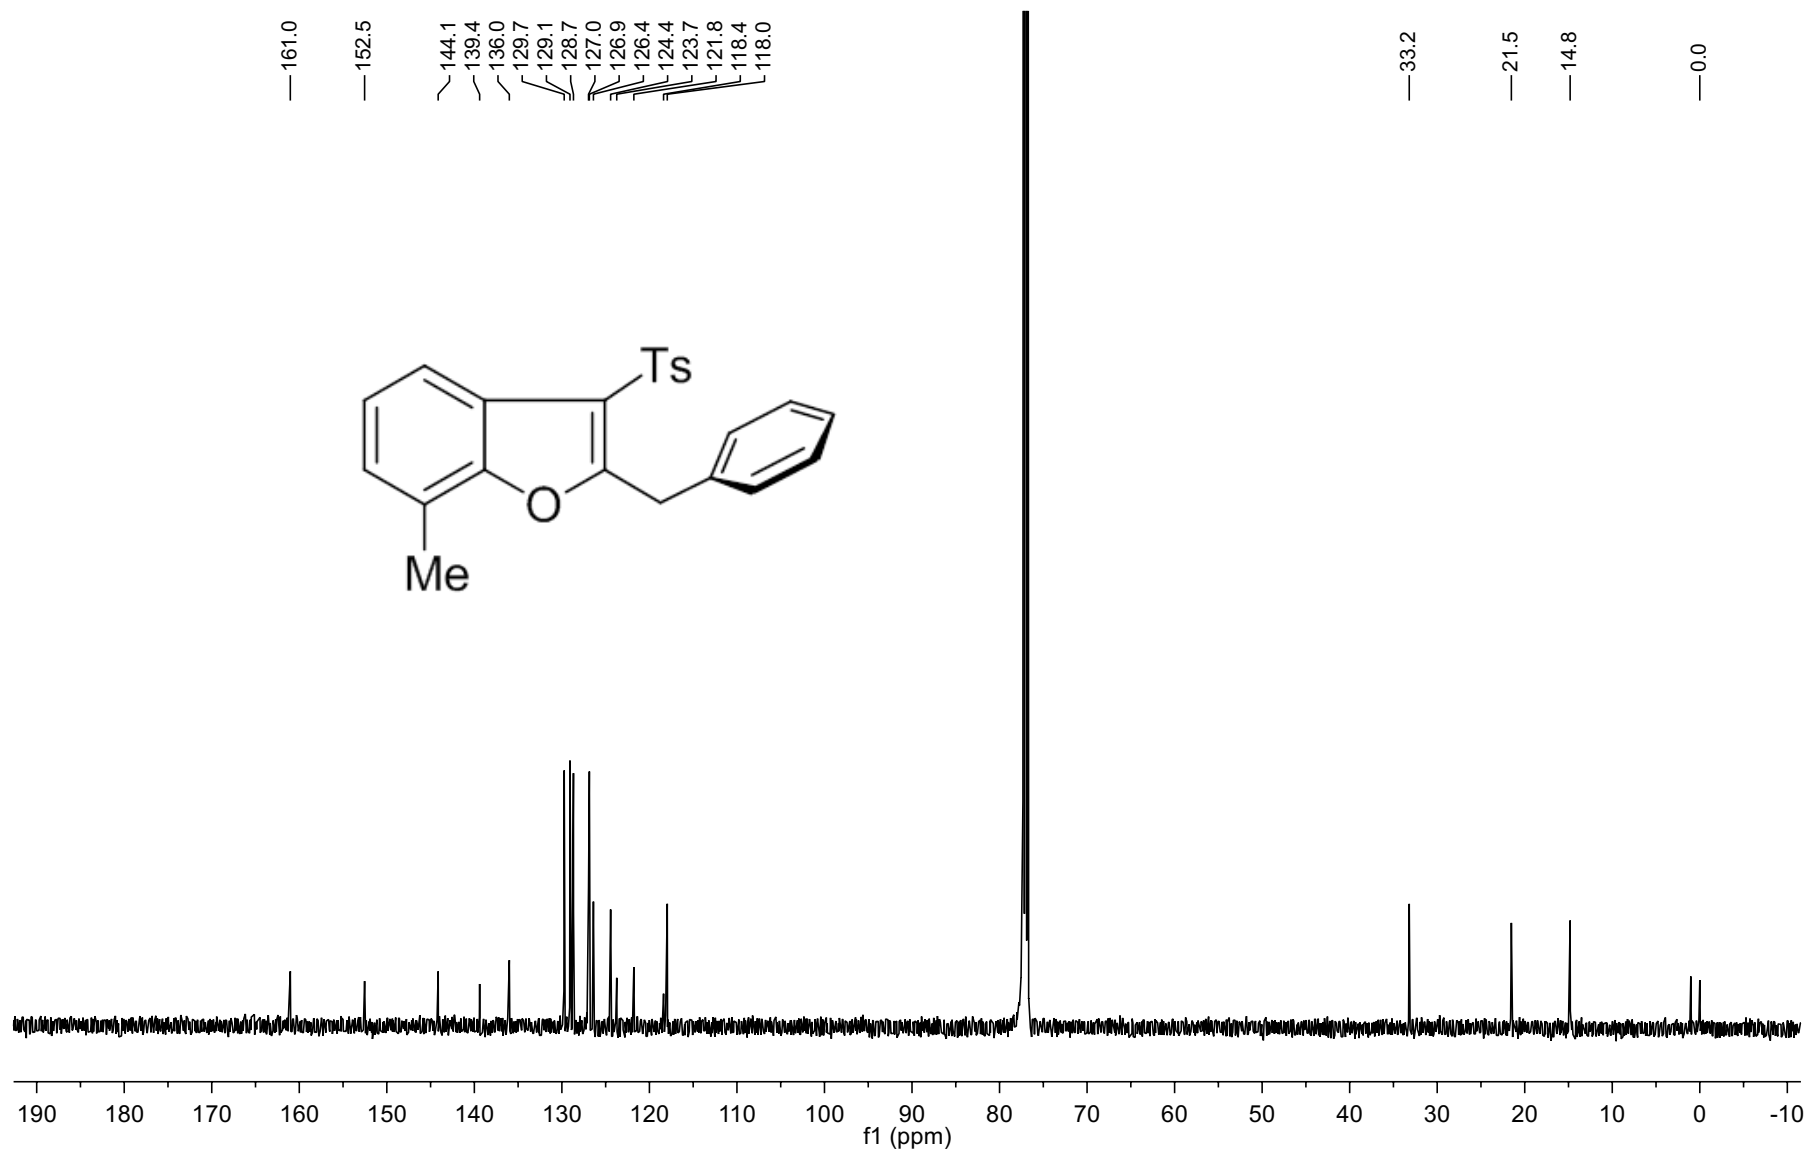

# $^1\text{H}$ NMR Spectroscopy of **4ca**

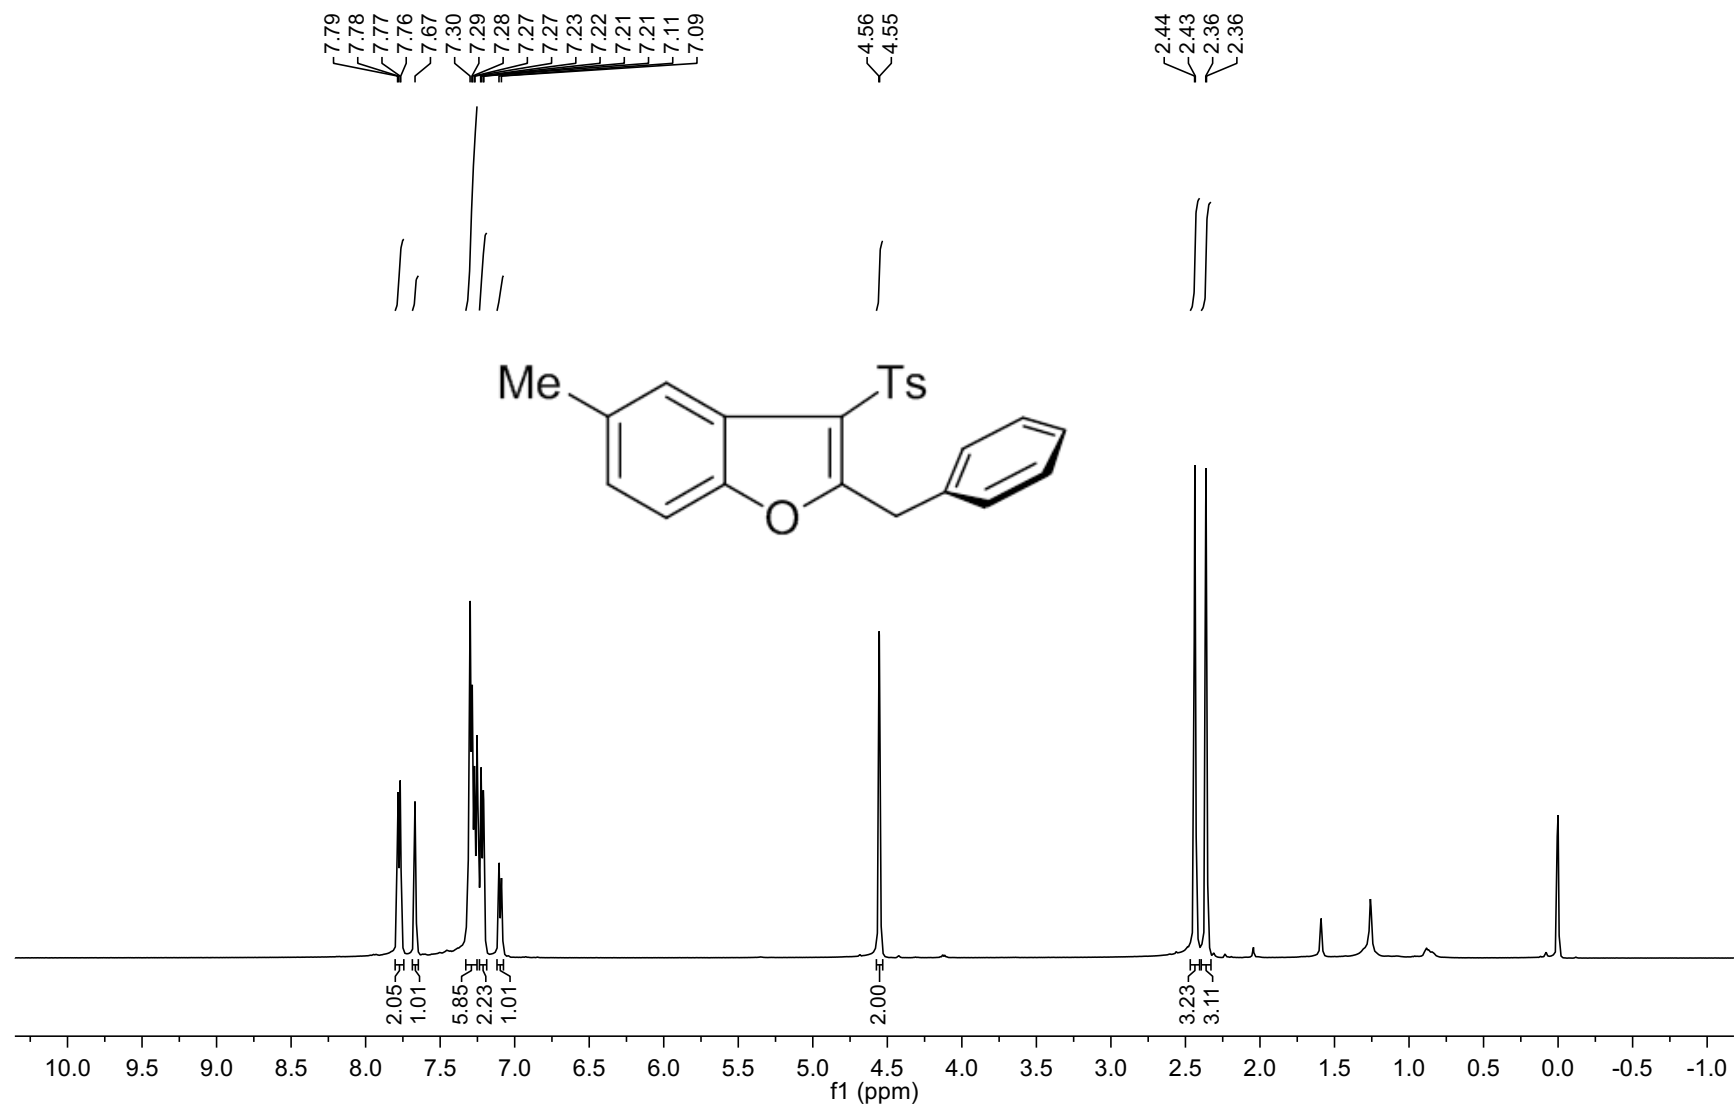

# $^{13}\text{C}$ NMR Spectroscopy of **4ca**

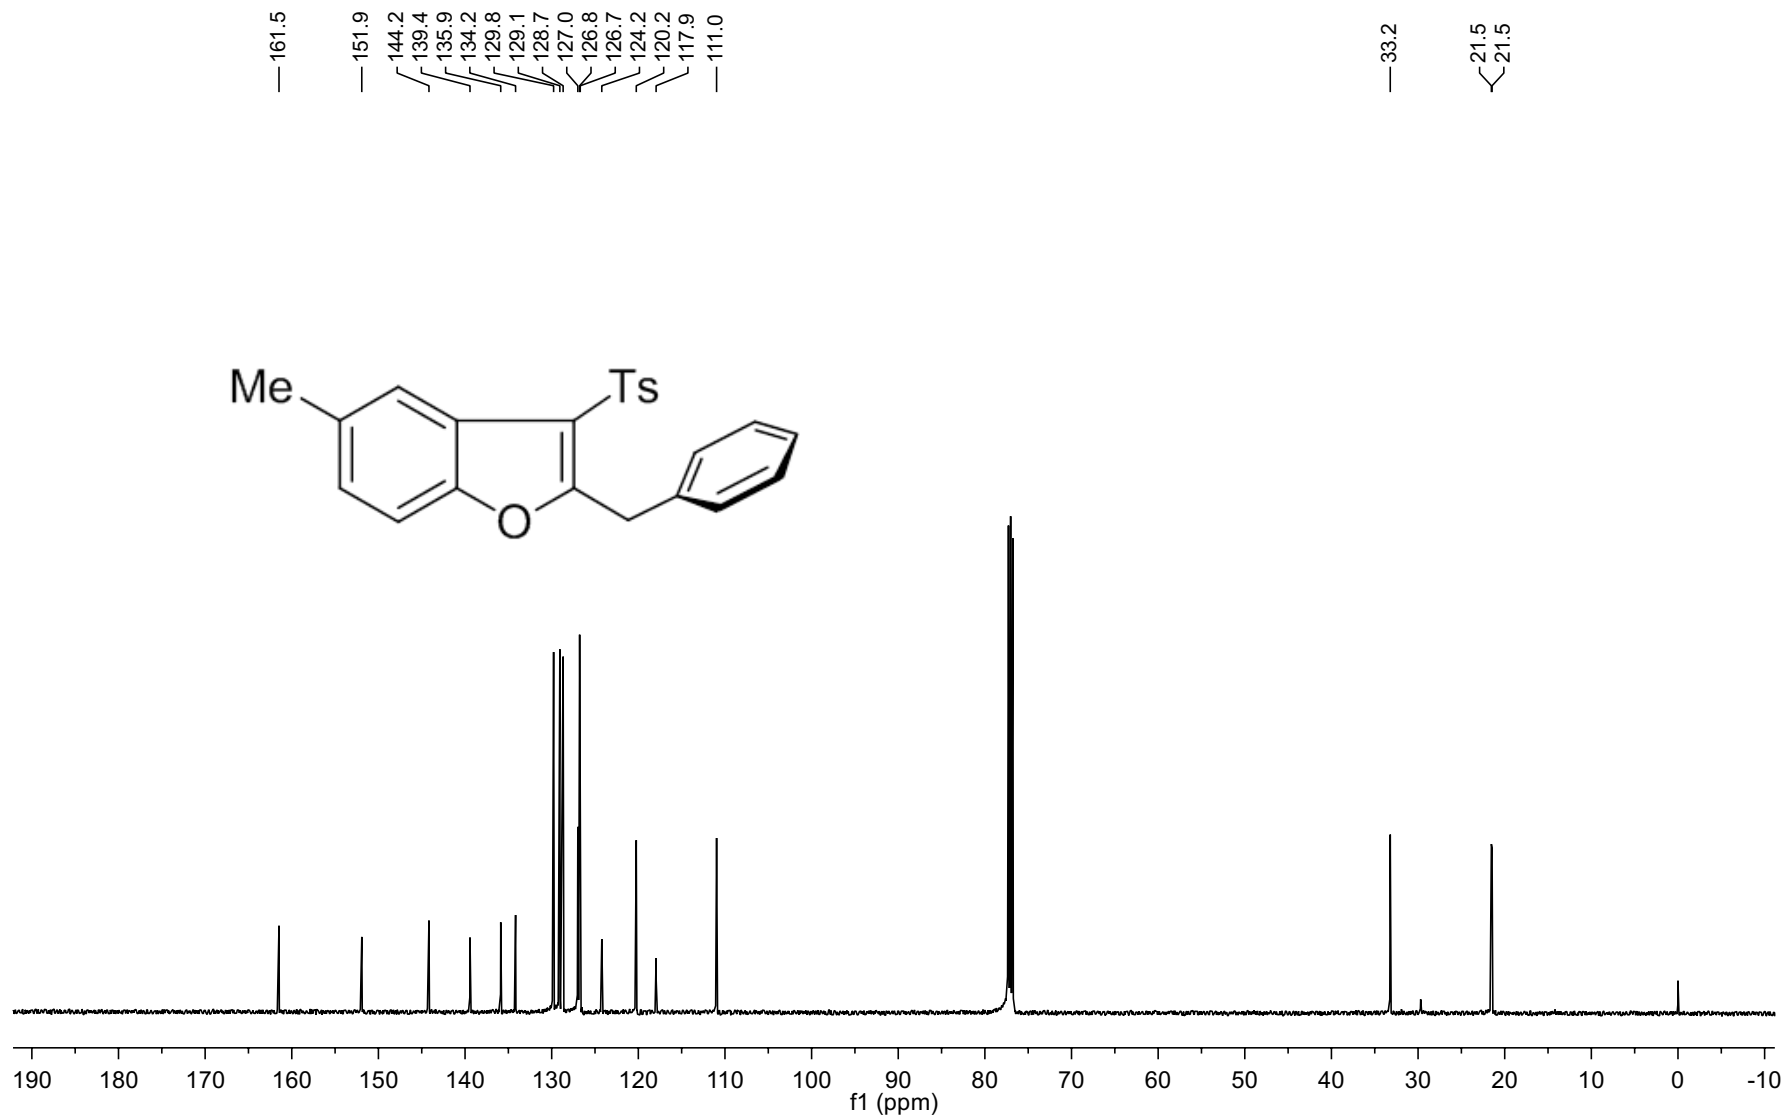

# $^1\text{H}$ NMR Spectroscopy of **4da**

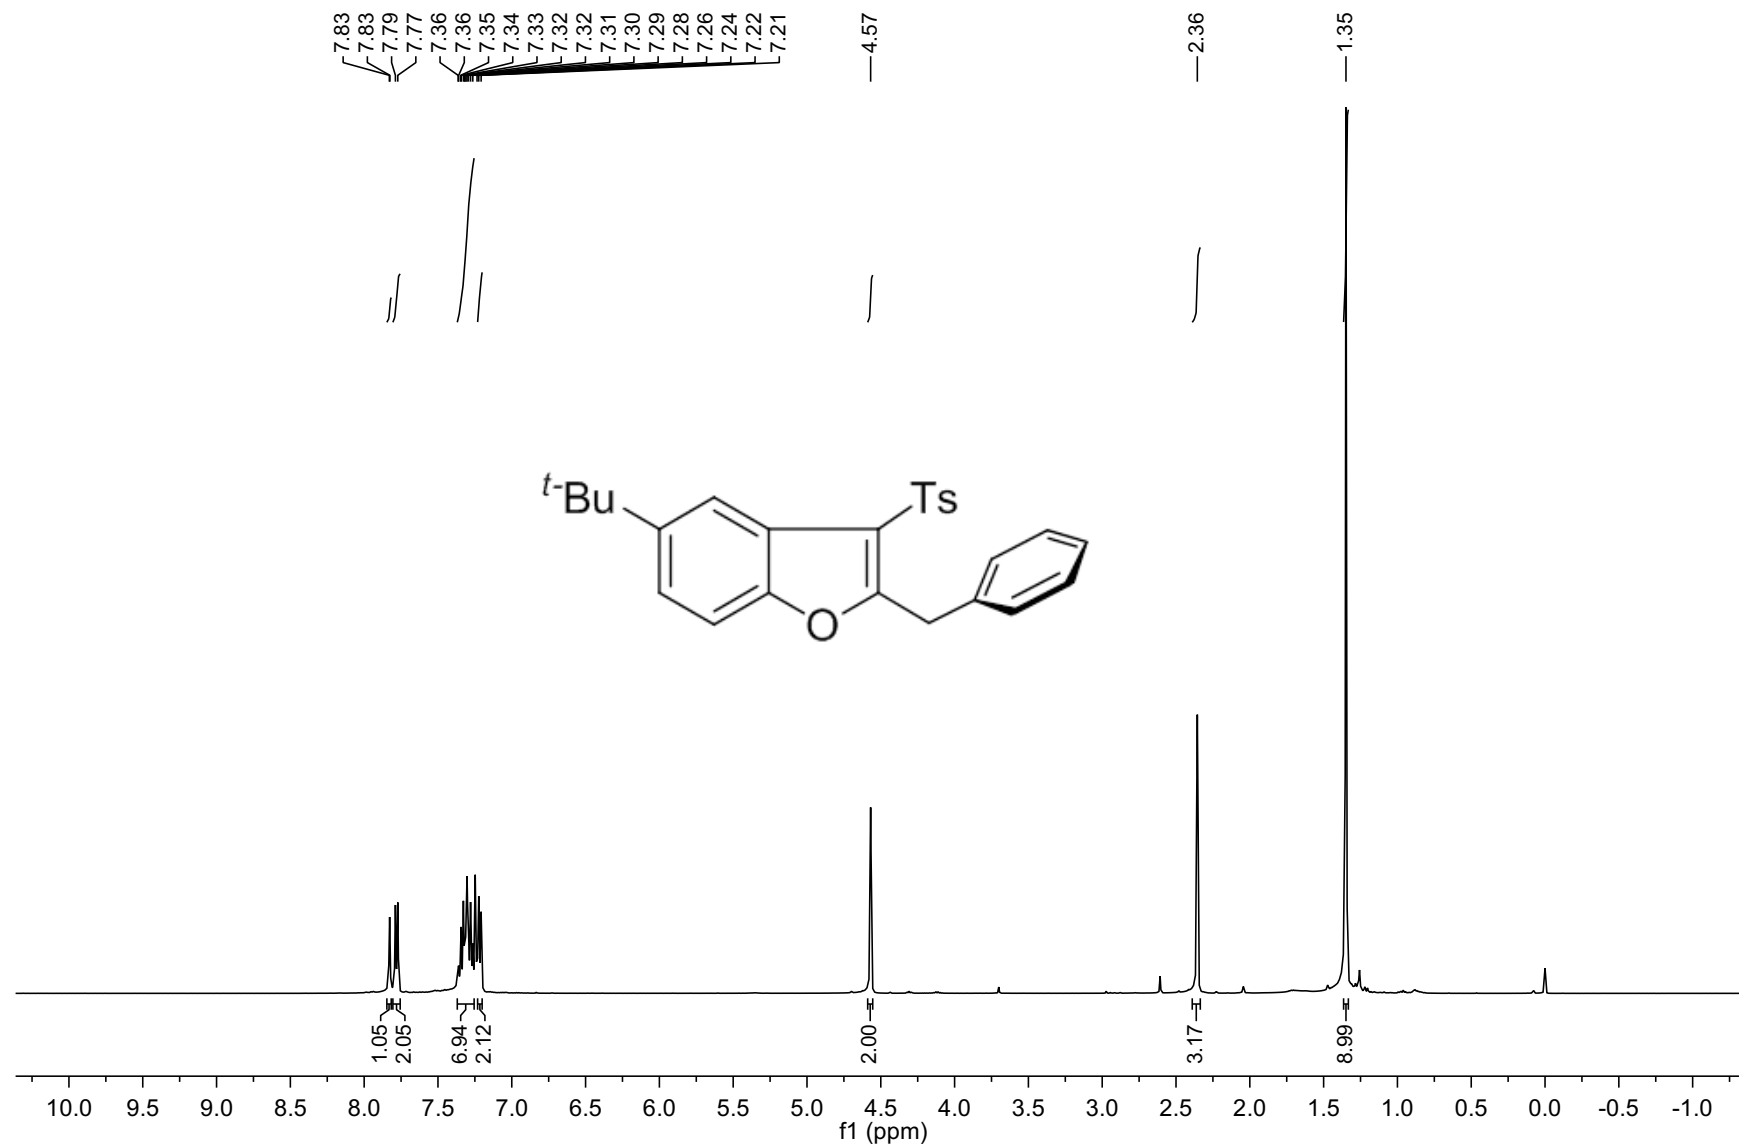

# $^{13}\text{C}$ NMR Spectroscopy of **4da**

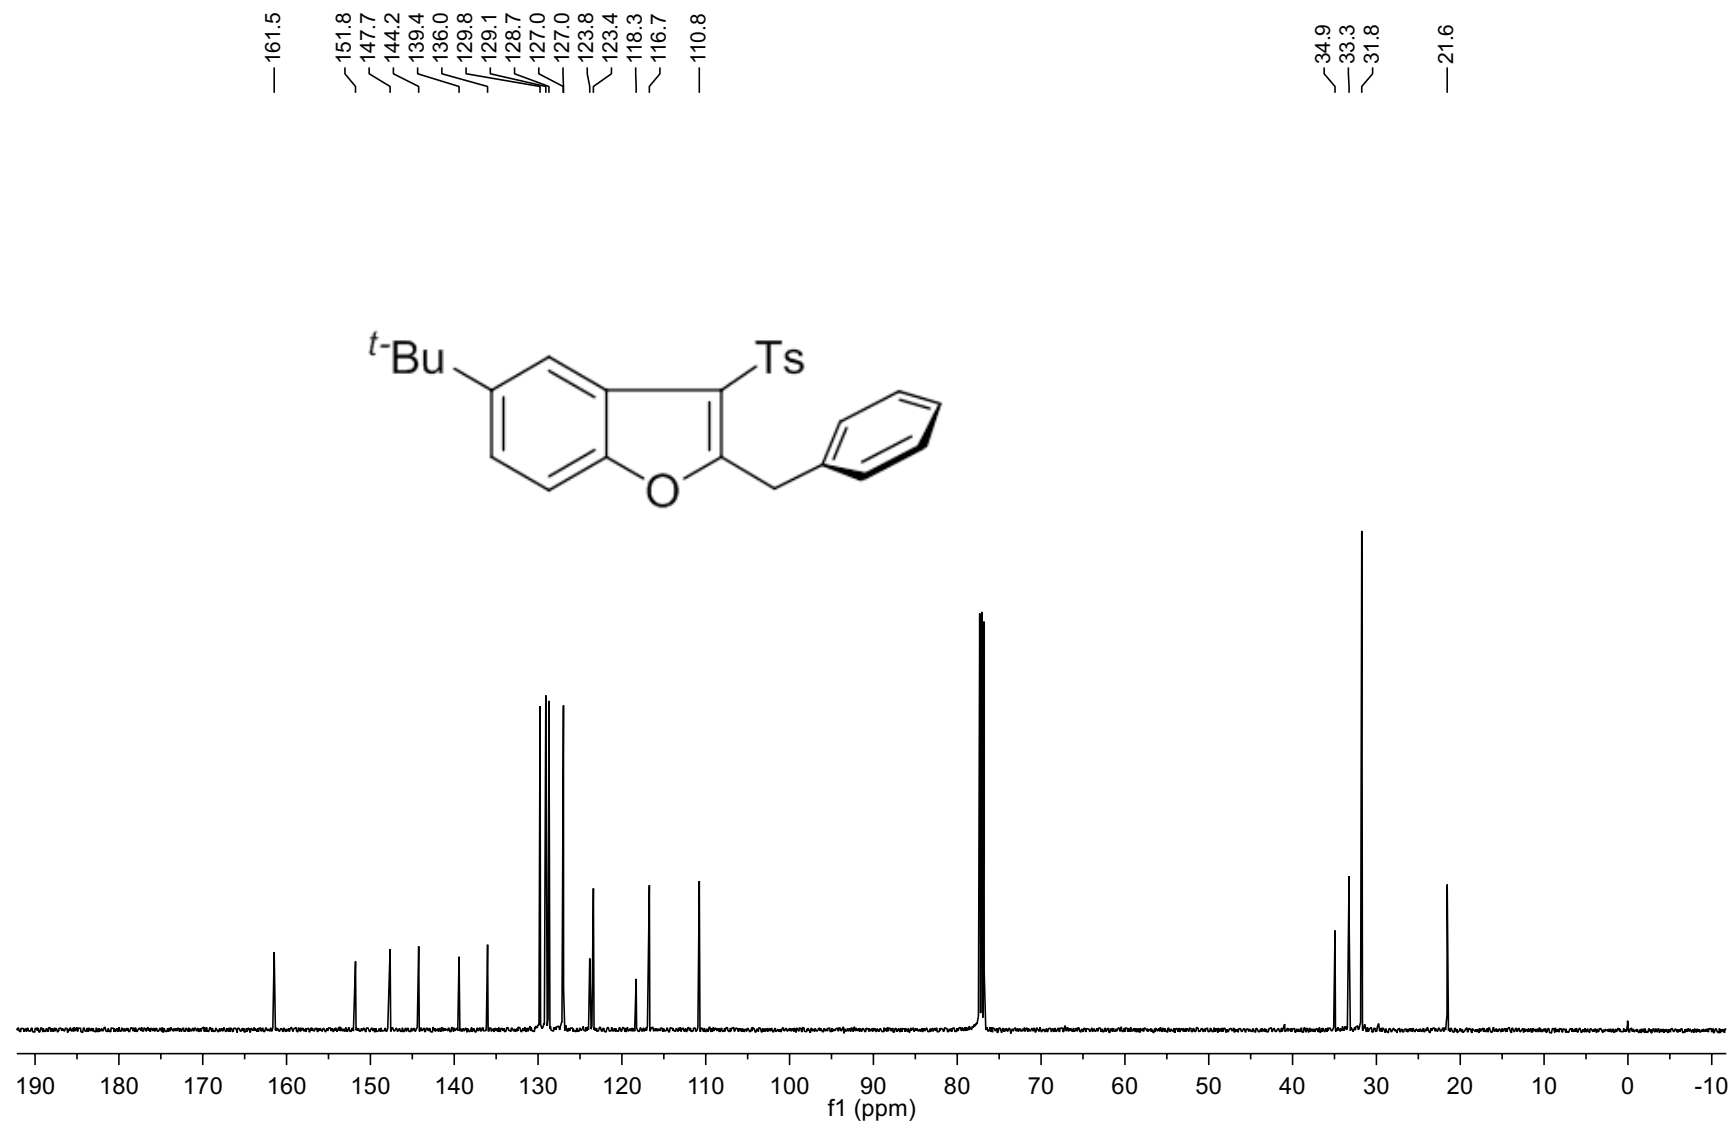

# <sup>1</sup>H NMR Spectroscopy of 4ea

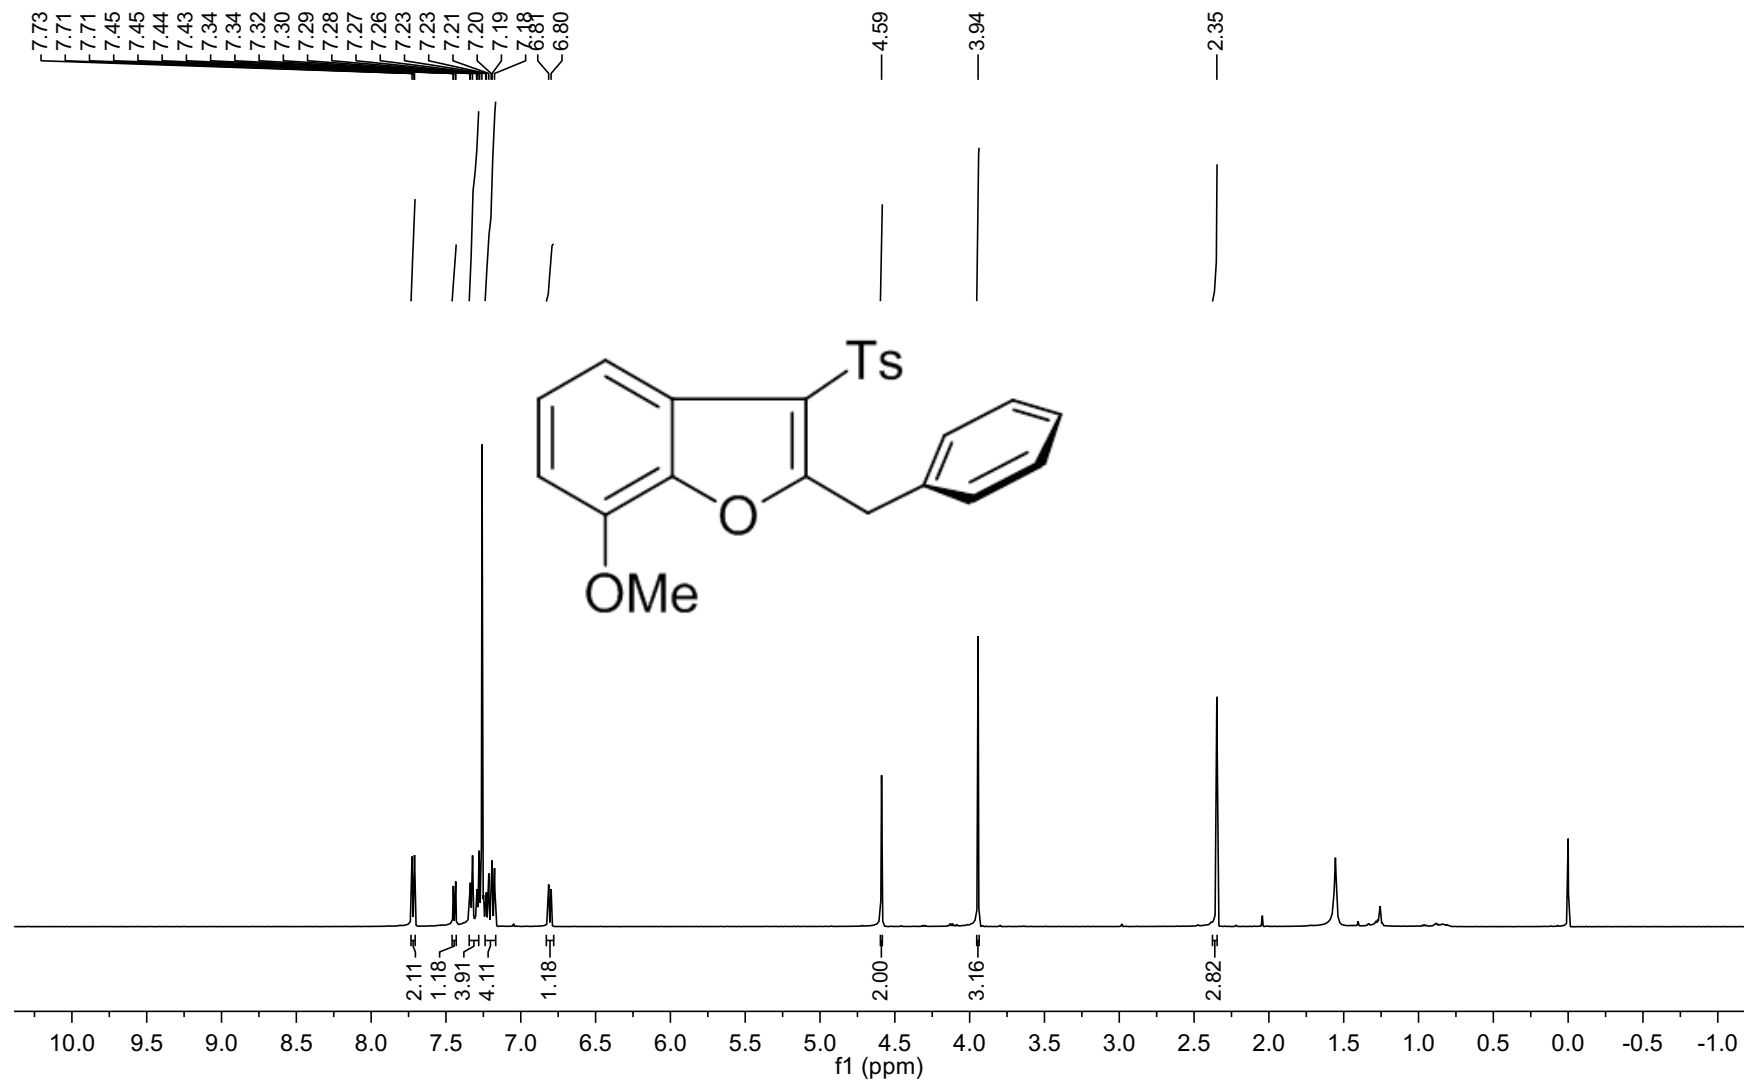

# $^{13}\text{C}$ NMR Spectroscopy of **4ea**

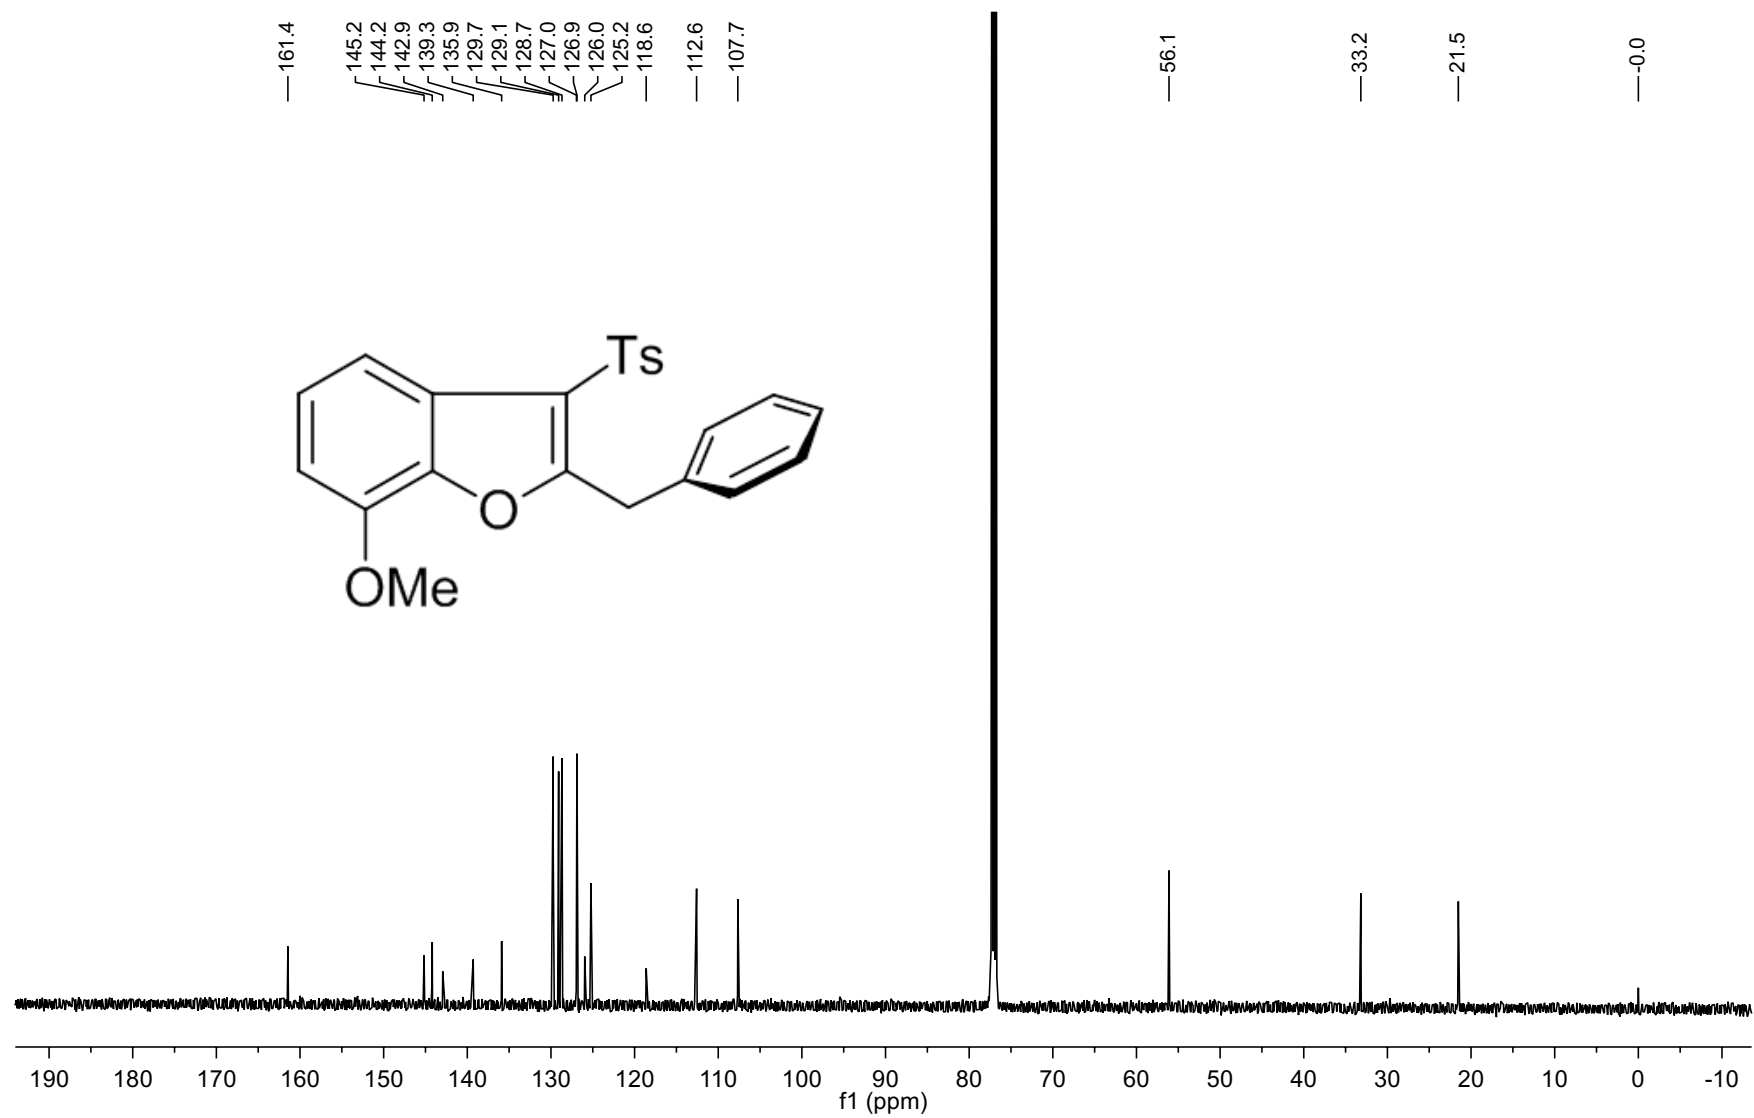

# <sup>1</sup>H NMR Spectroscopy of 4fa

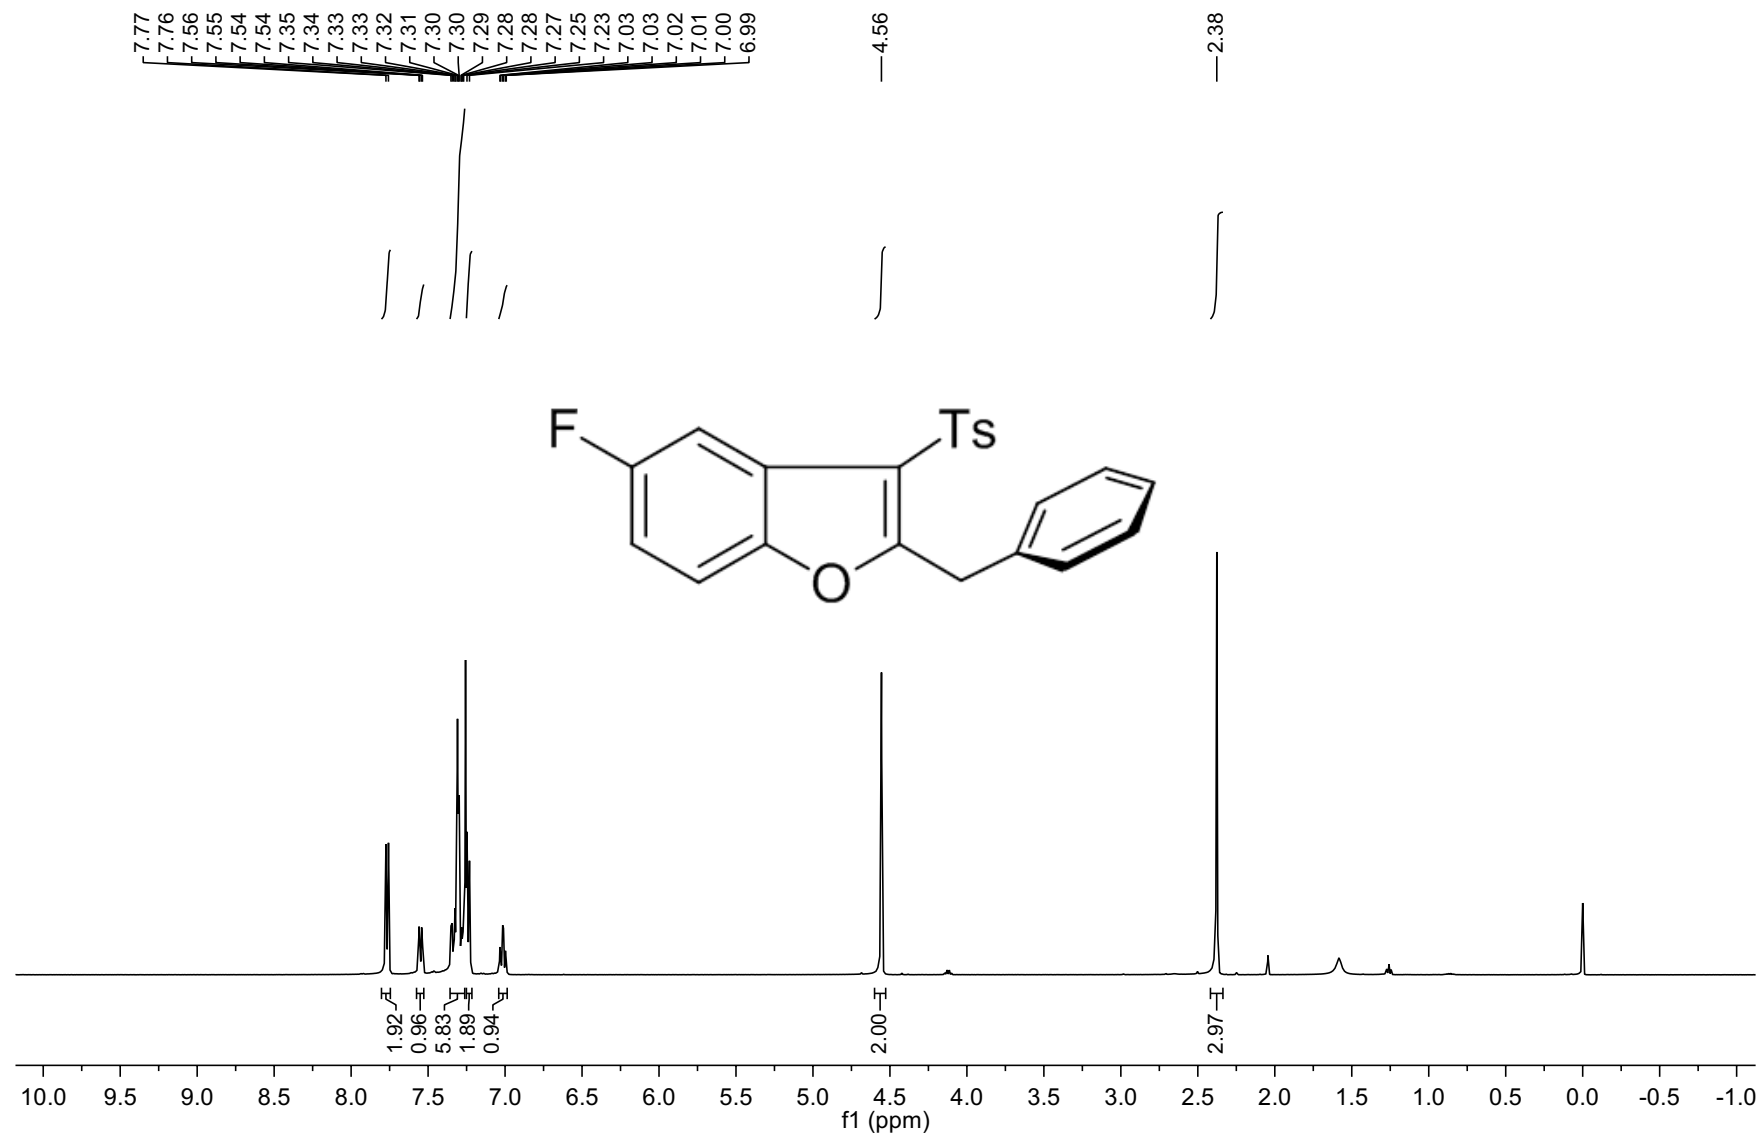



# $^{13}\text{C}$ NMR Spectroscopy of **4fa**

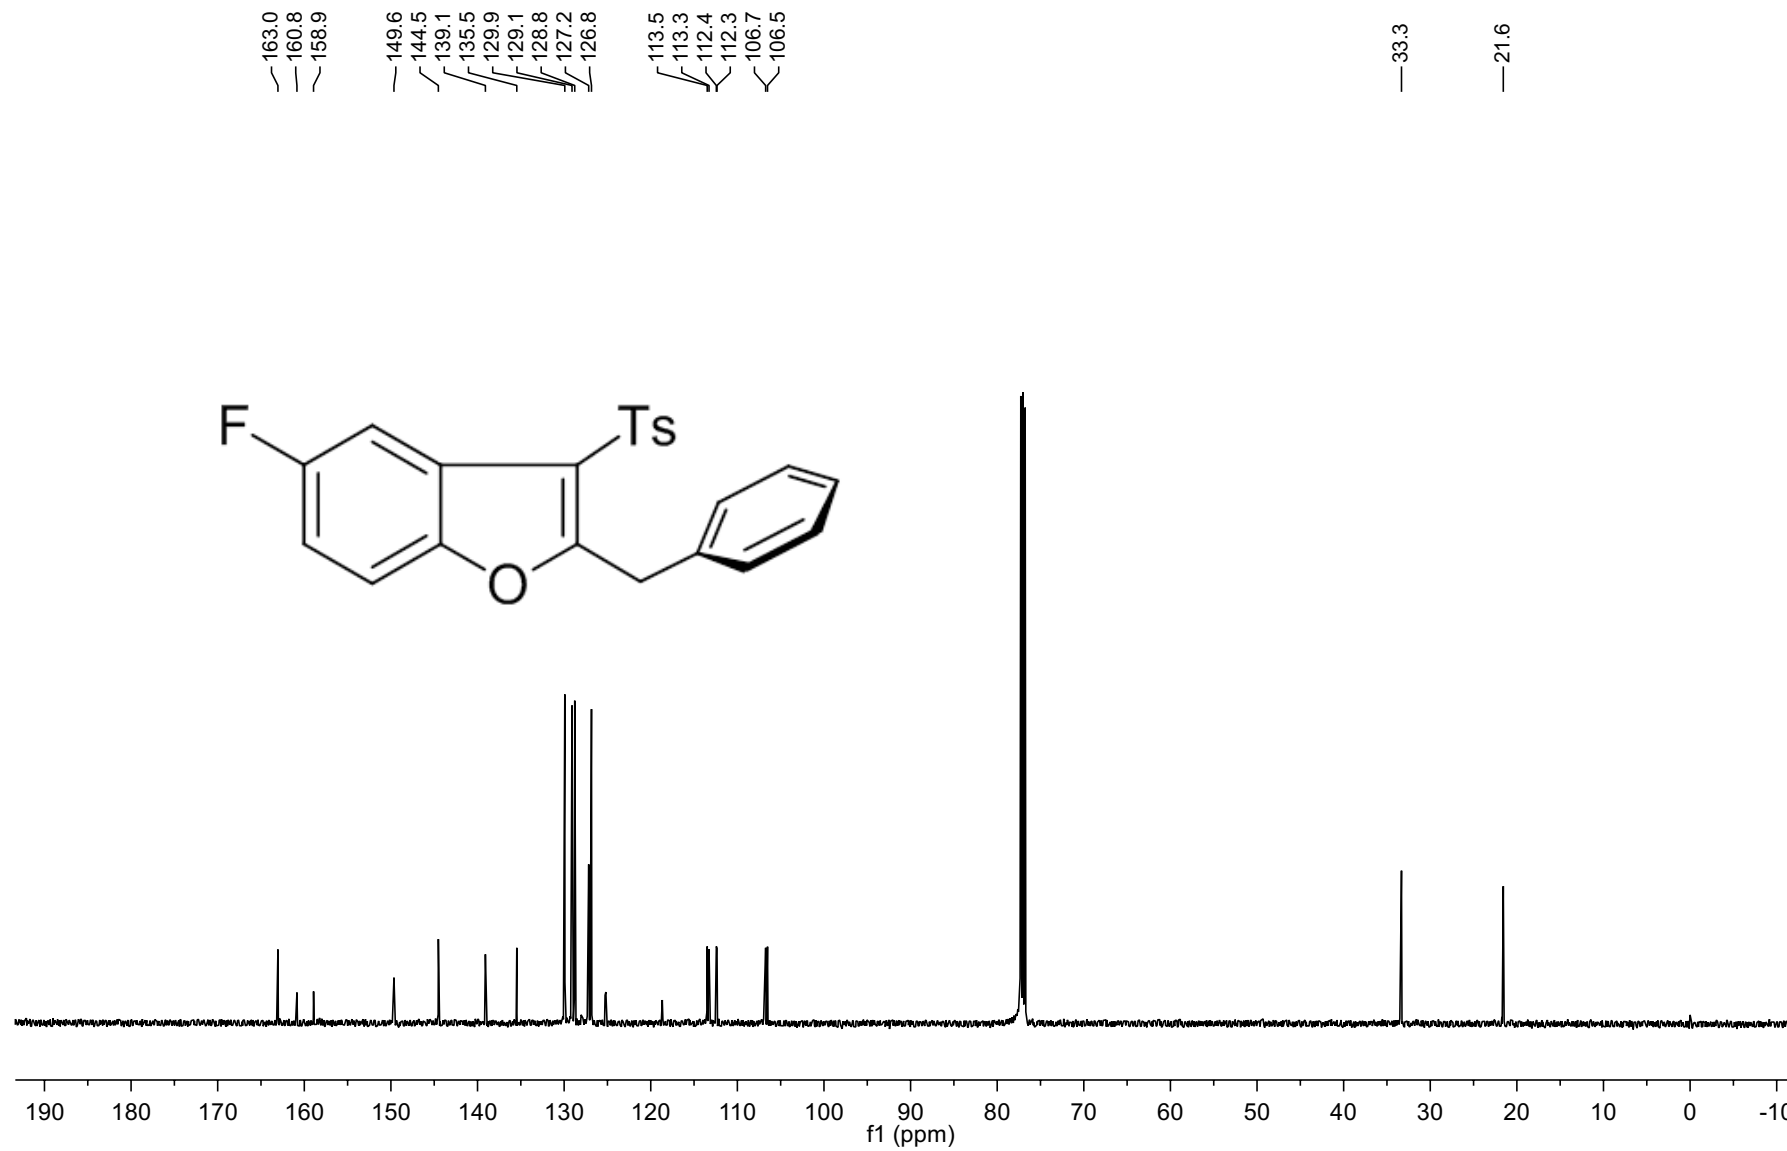

# $^{19}\text{F}$ NMR Spectroscopy of **4fa**

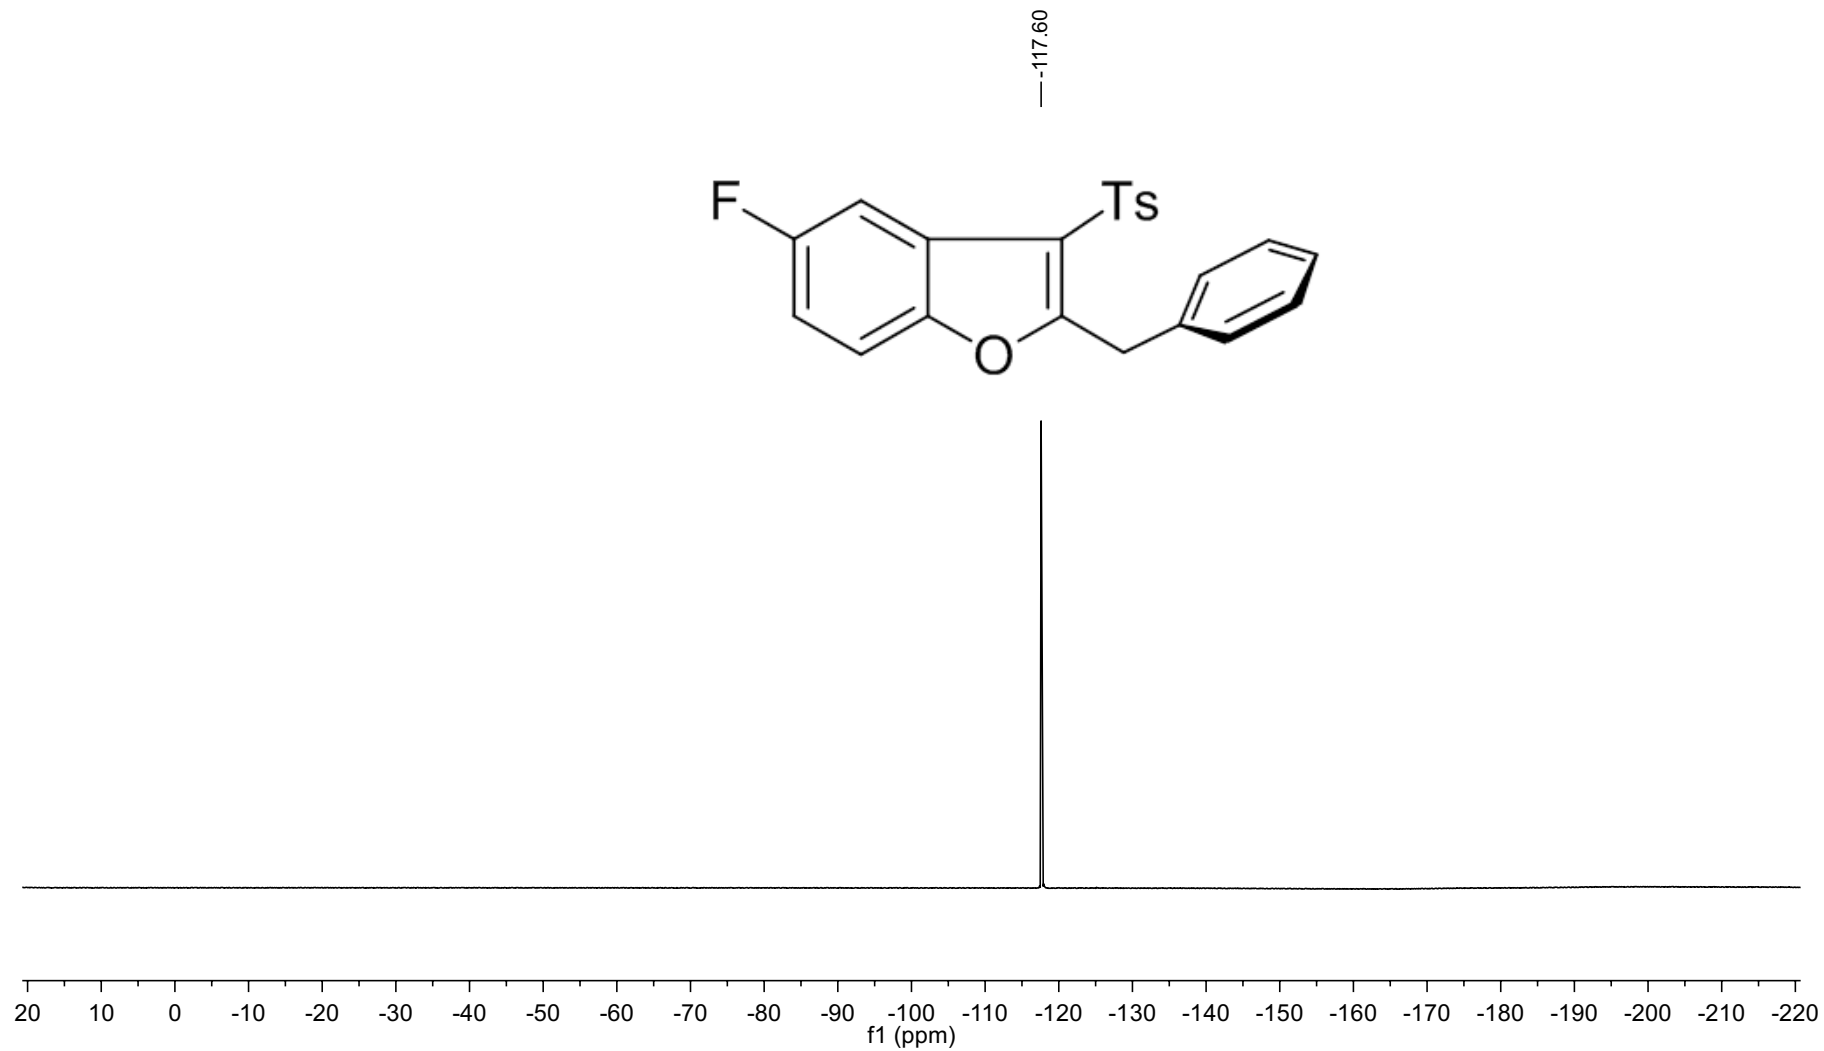

# <sup>1</sup>H NMR Spectroscopy of 4ga

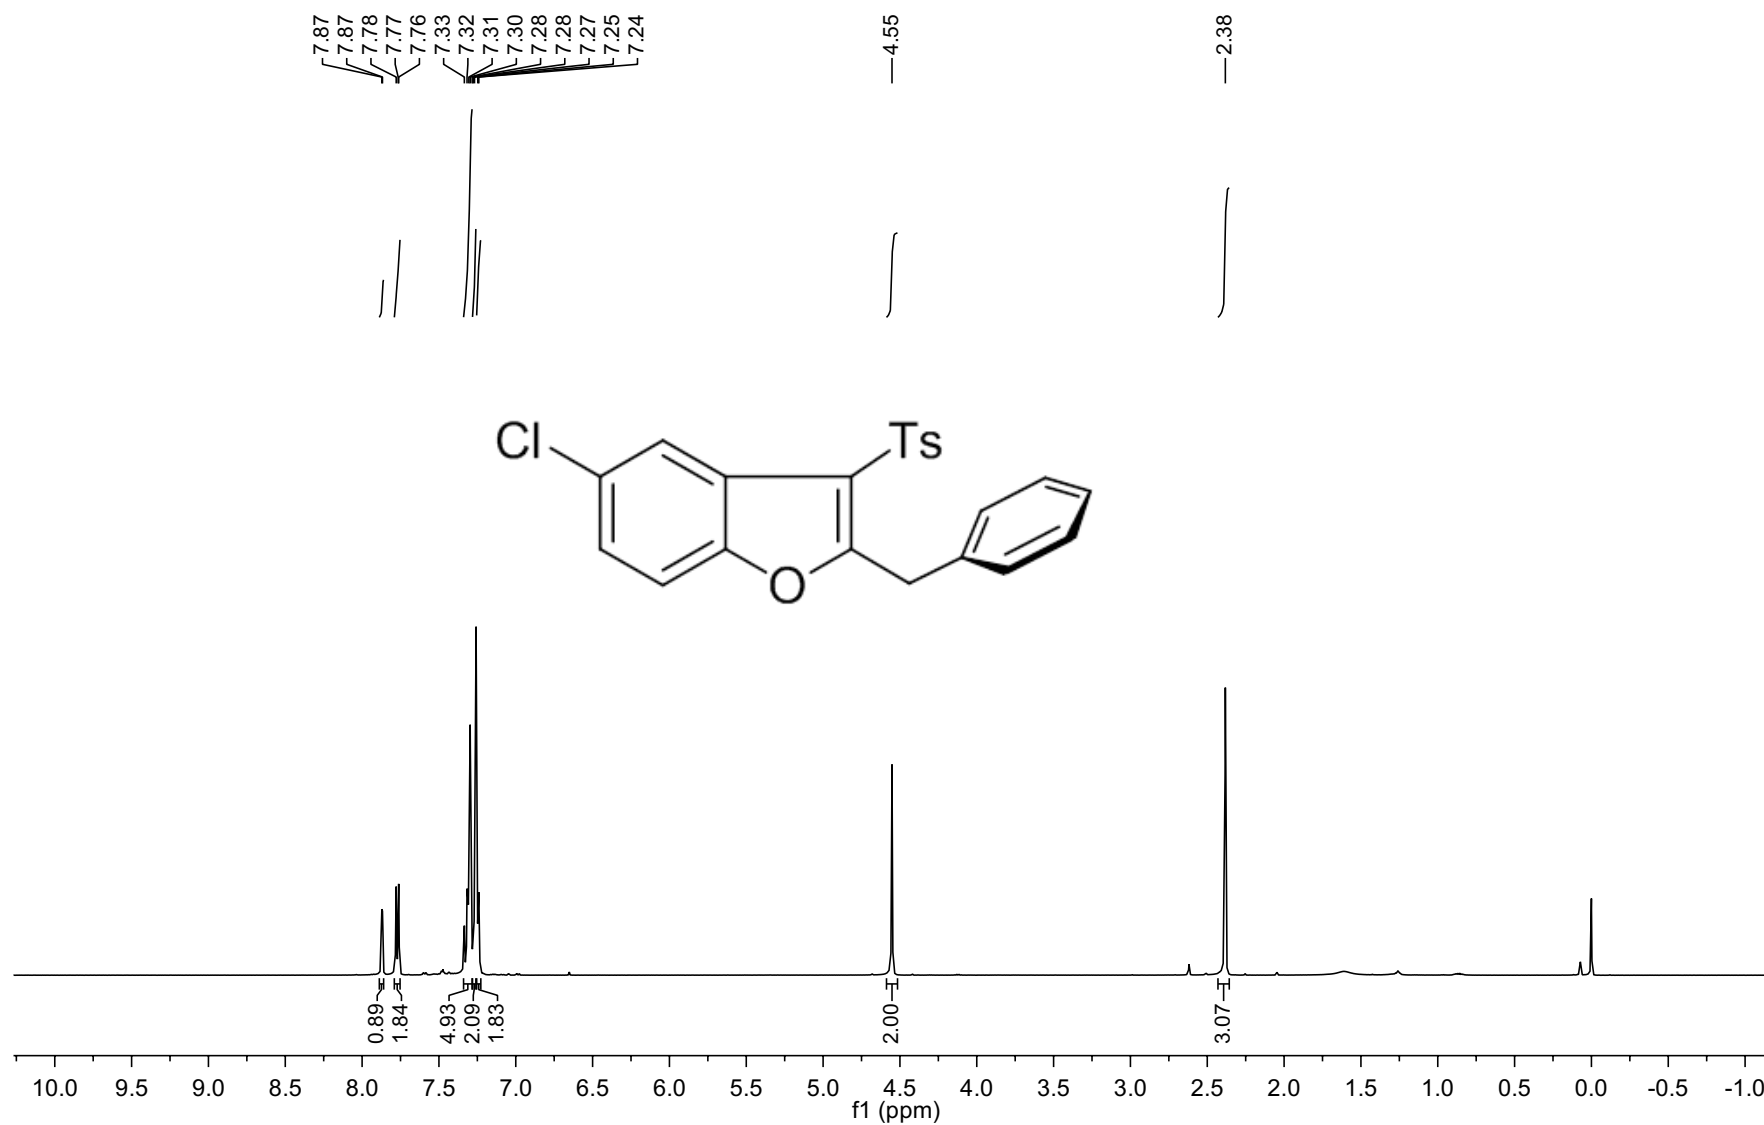

# $^{13}\text{C}$ NMR Spectroscopy of **4ga**

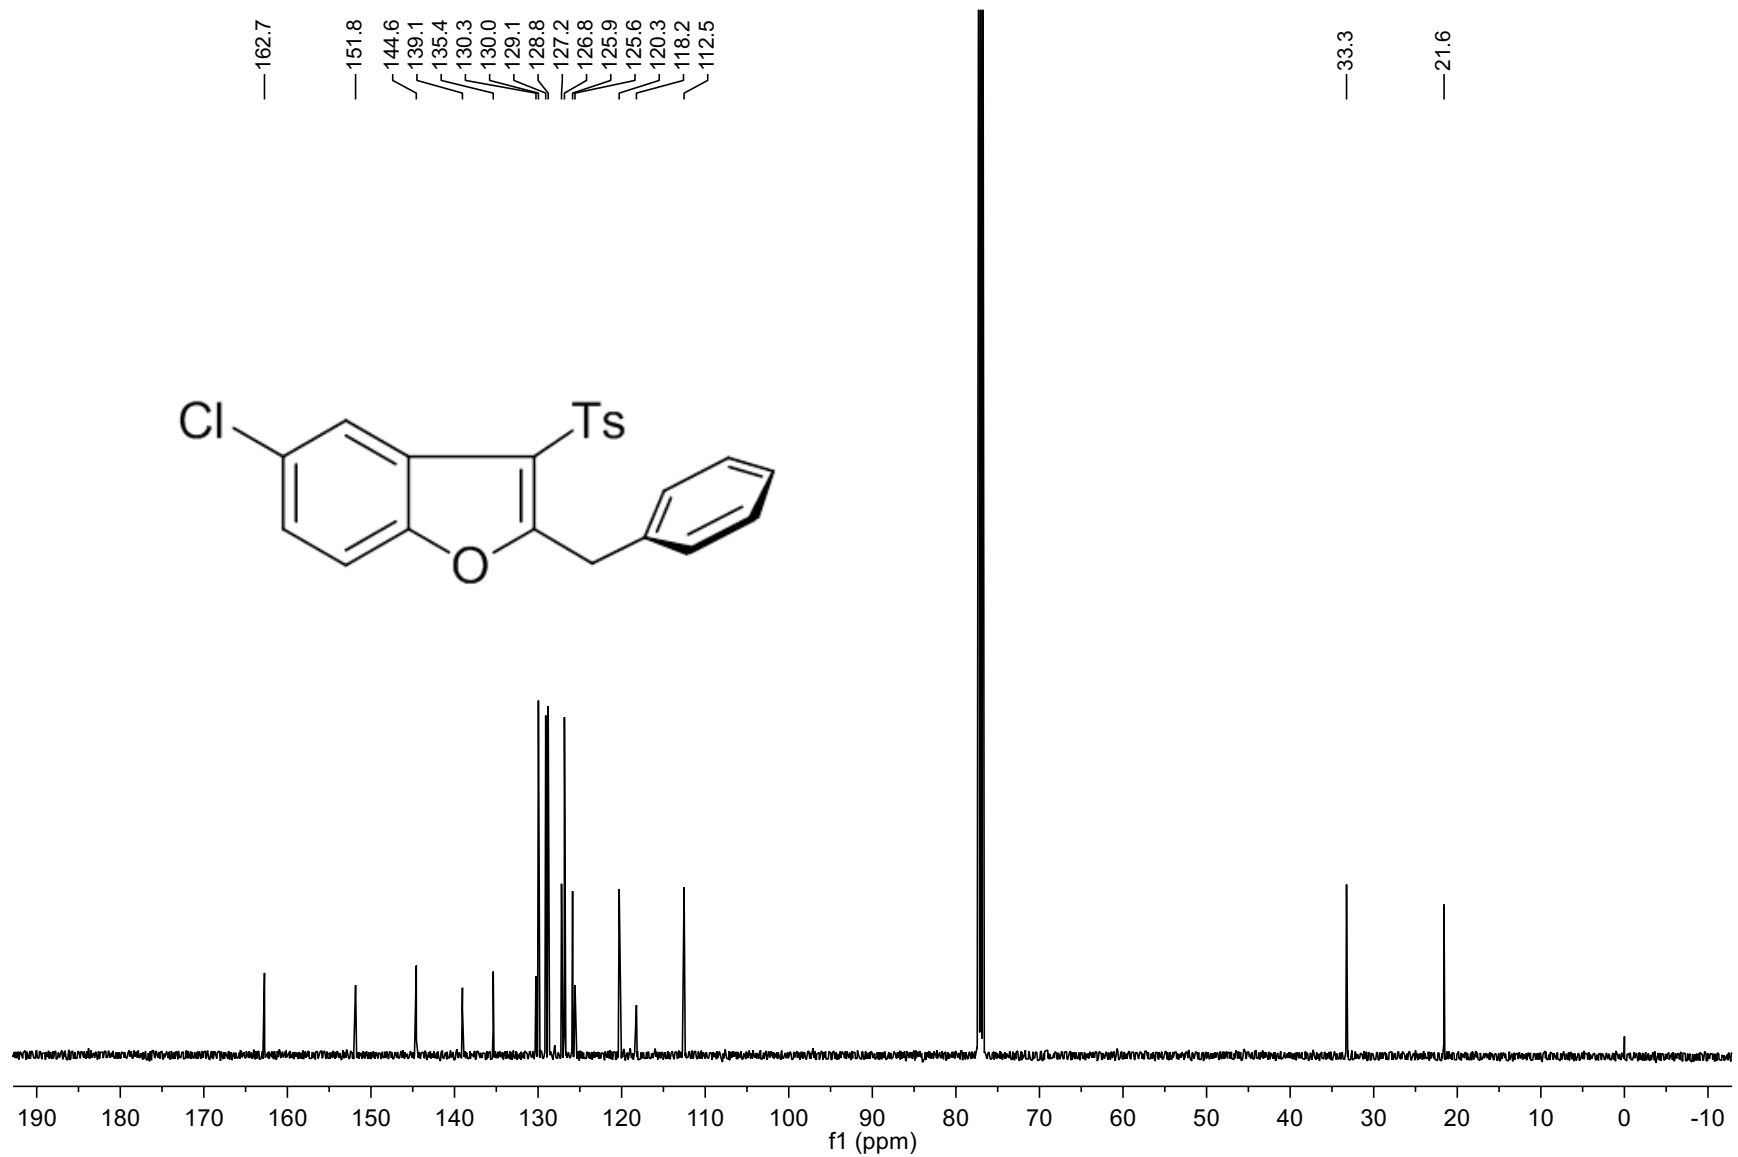

# $^1\text{H}$ NMR Spectroscopy of 4ga'

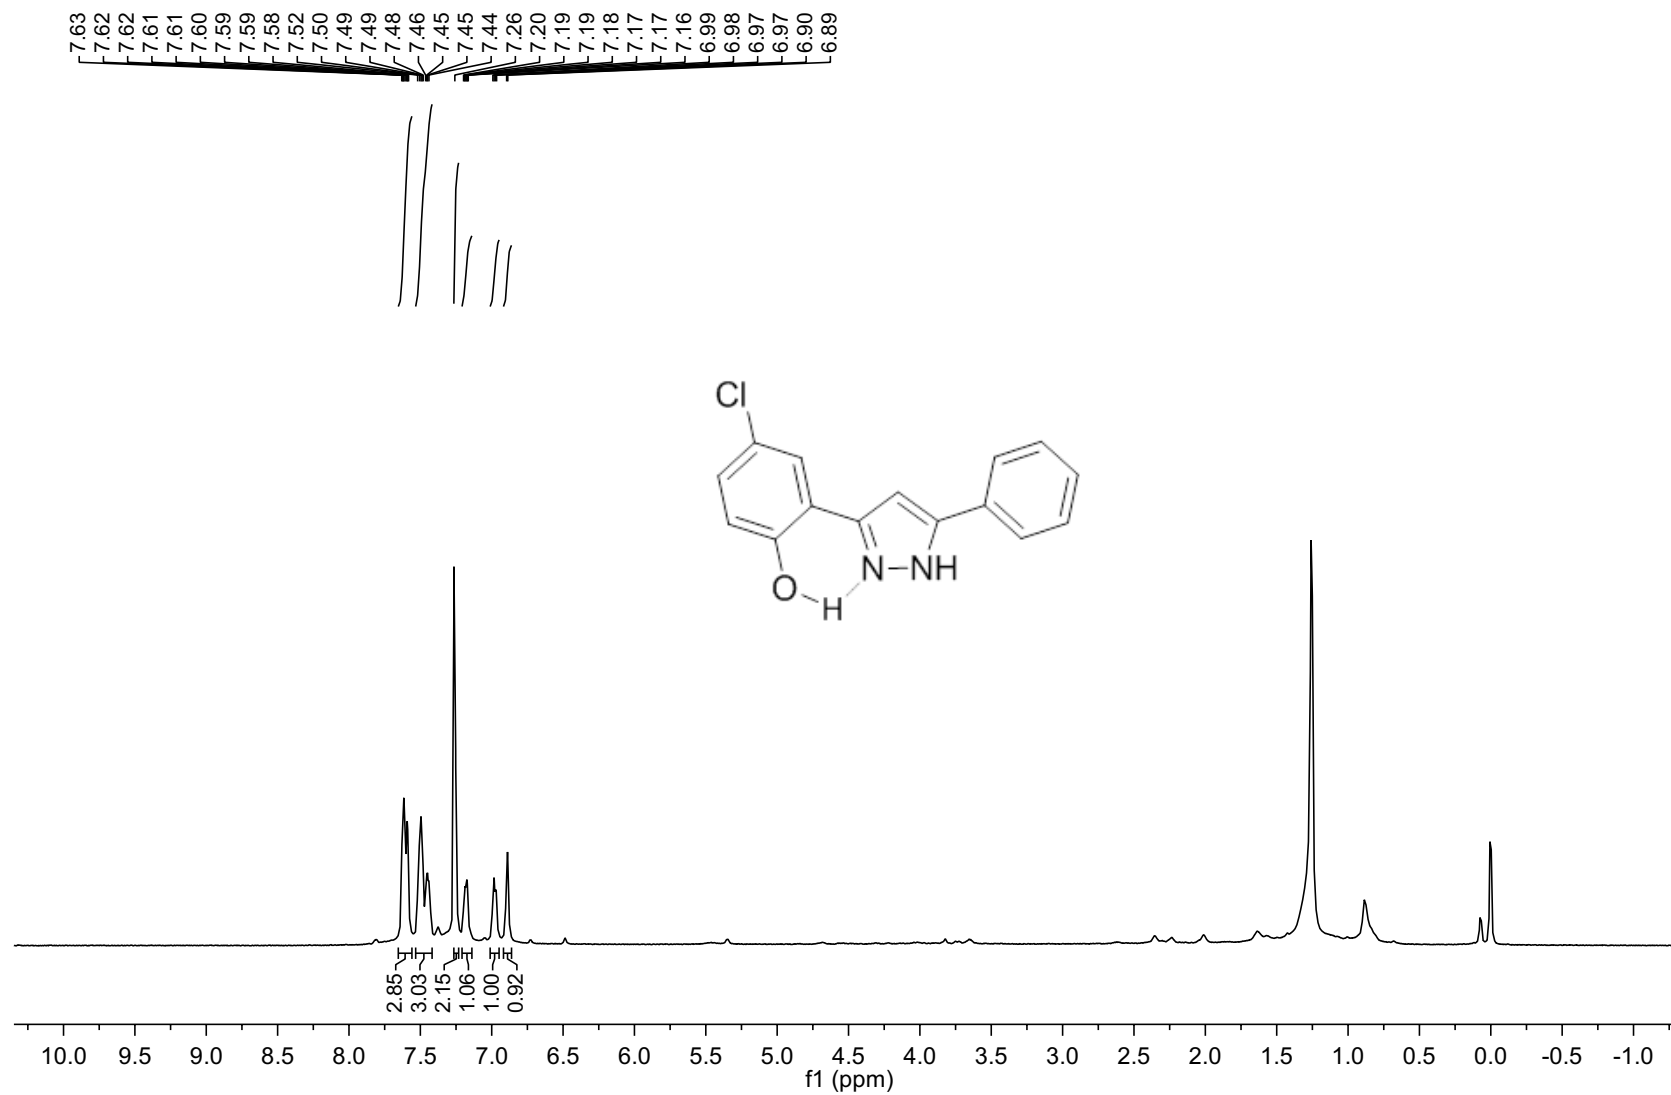

# $^{13}\text{C}$ NMR Spectroscopy of 4ga'

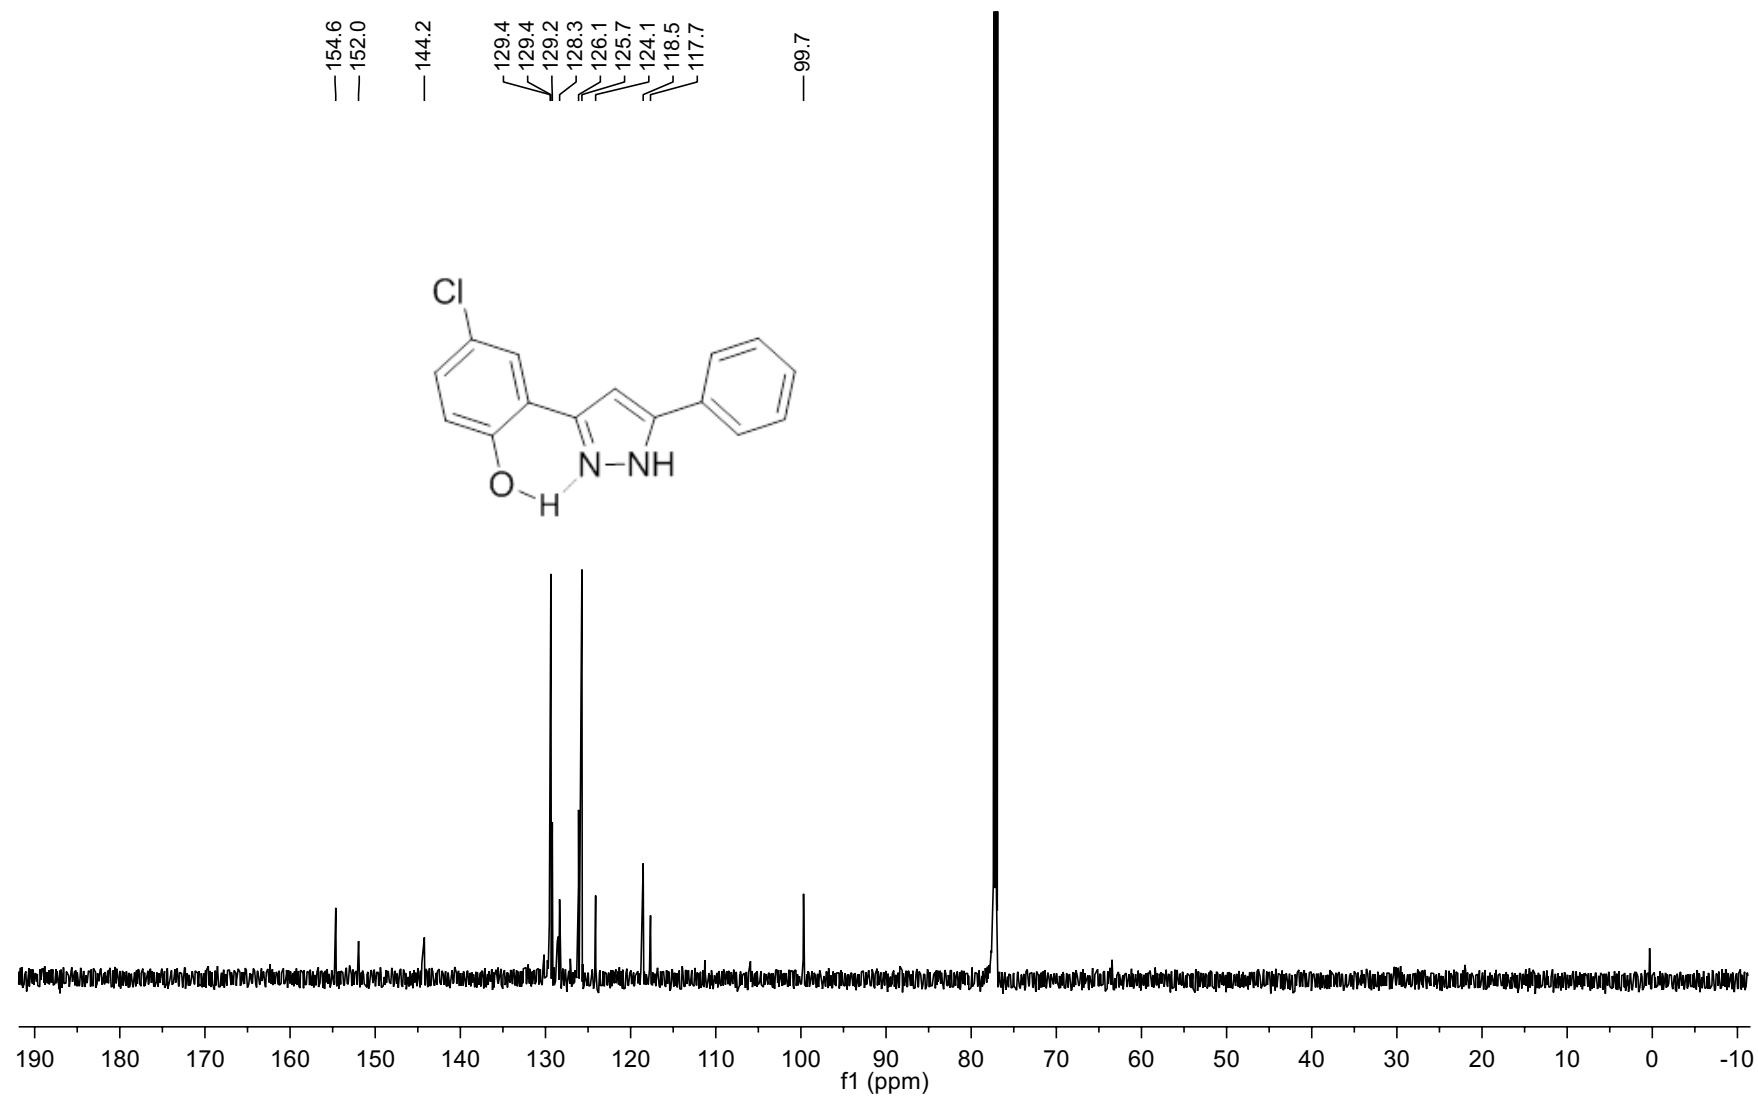

# $^1\text{H}$ NMR Spectroscopy of **4ha**

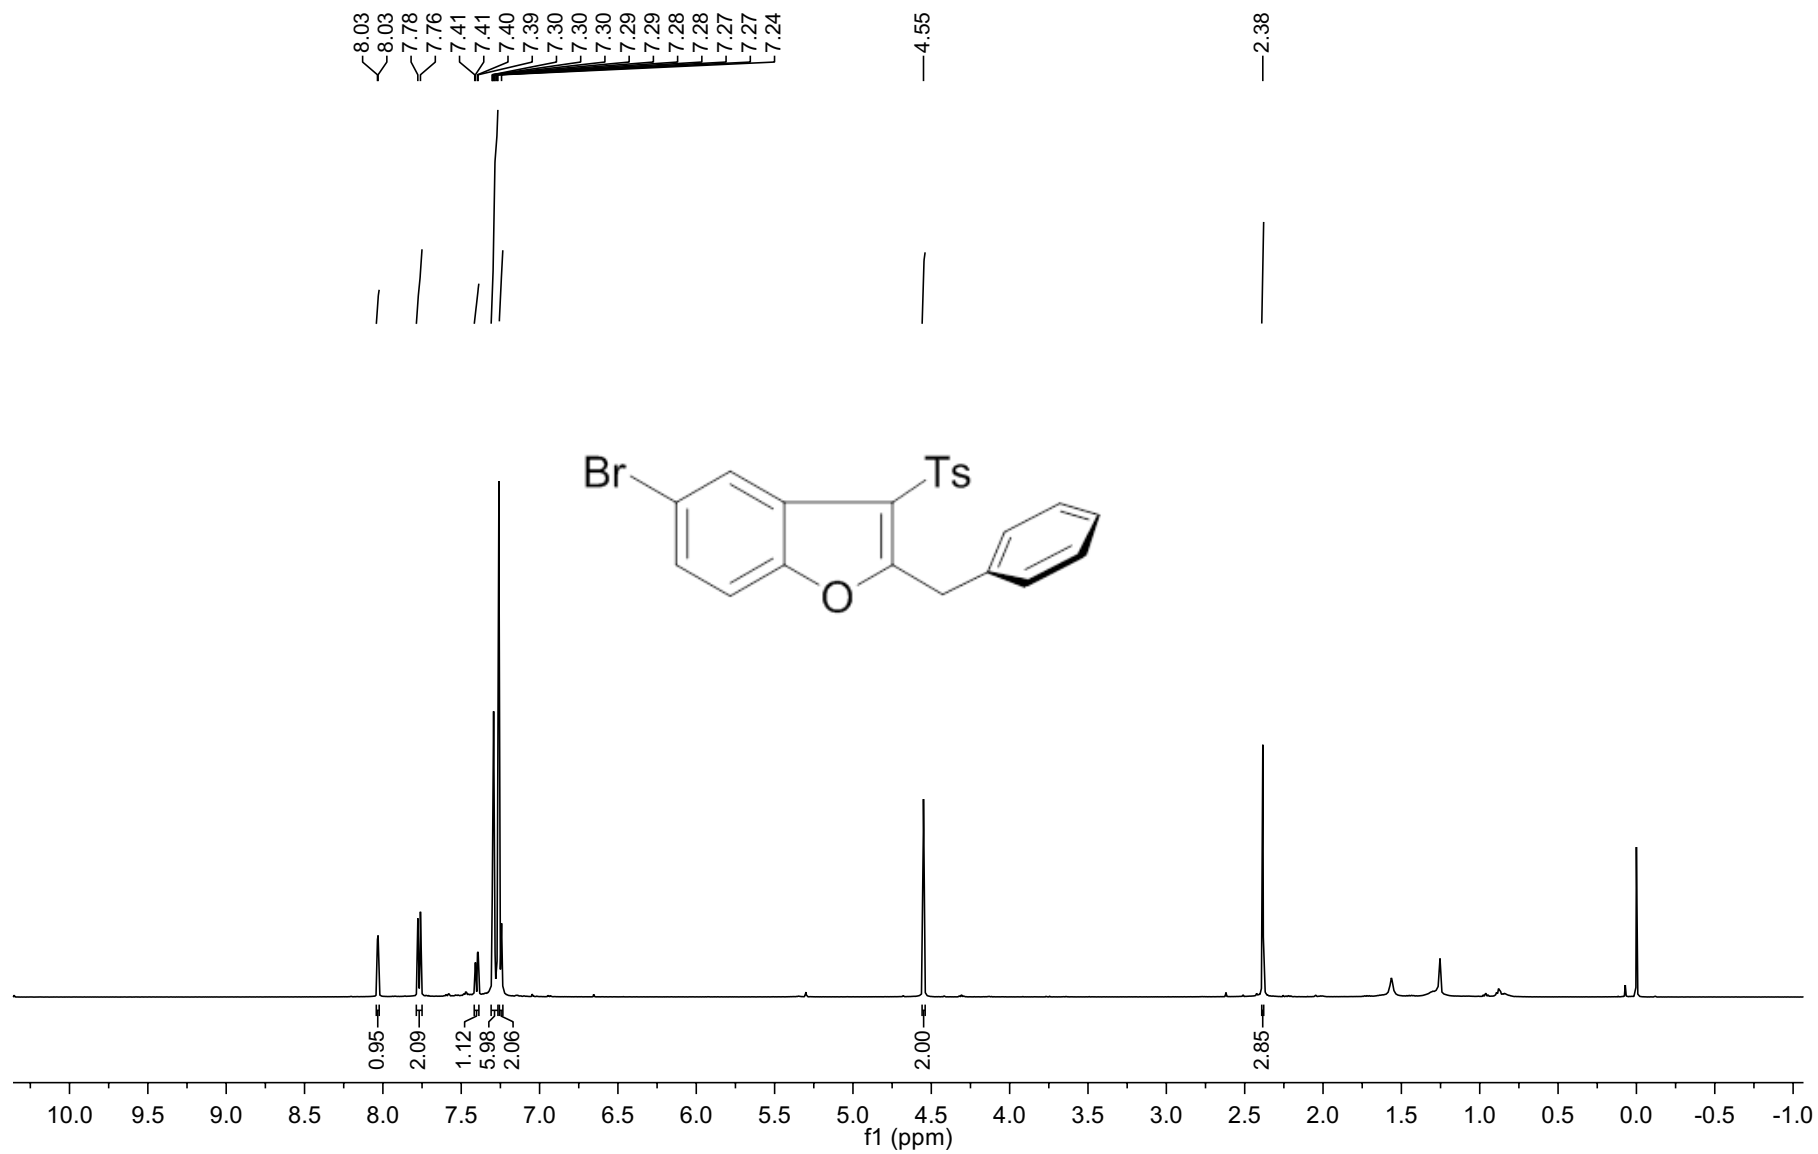

# $^{13}\text{C}$ NMR Spectroscopy of **4ha**

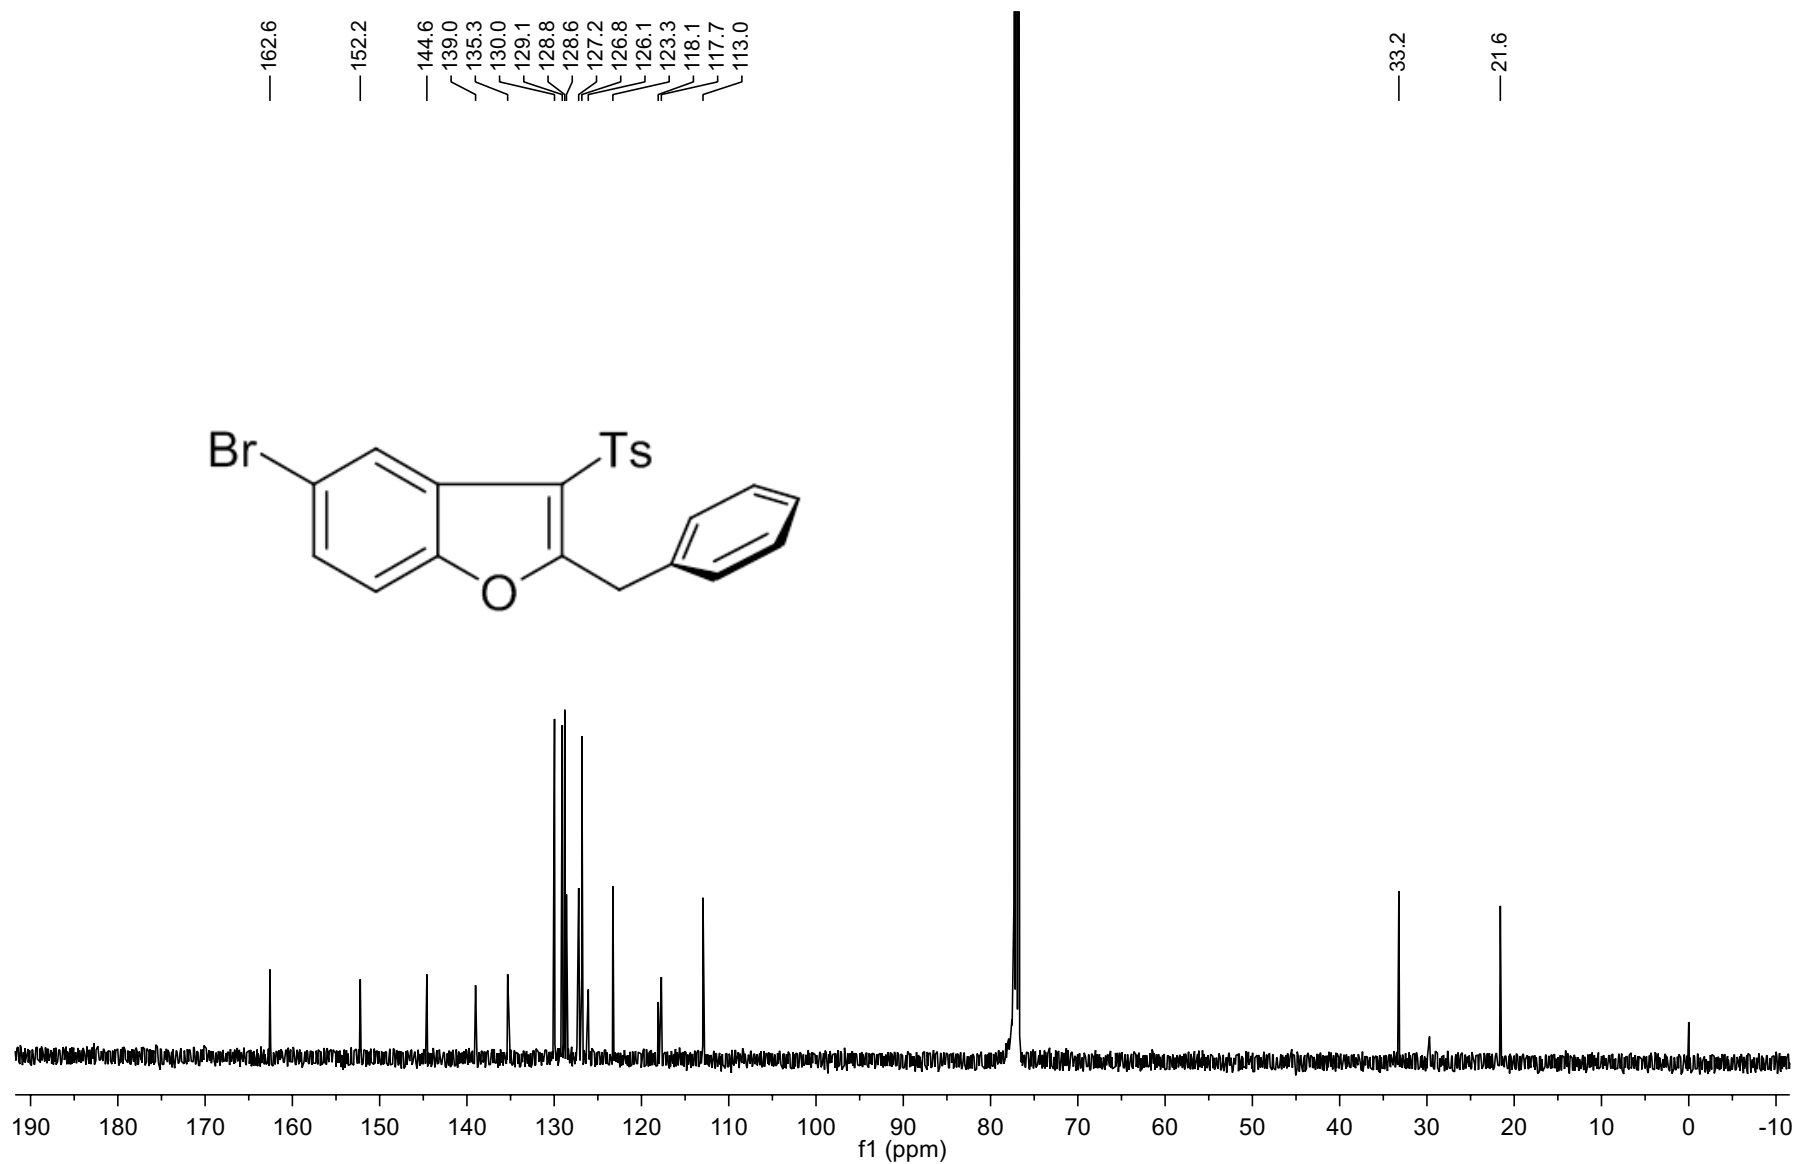



# $^1\text{H}$ NMR Spectroscopy of **4ha'**

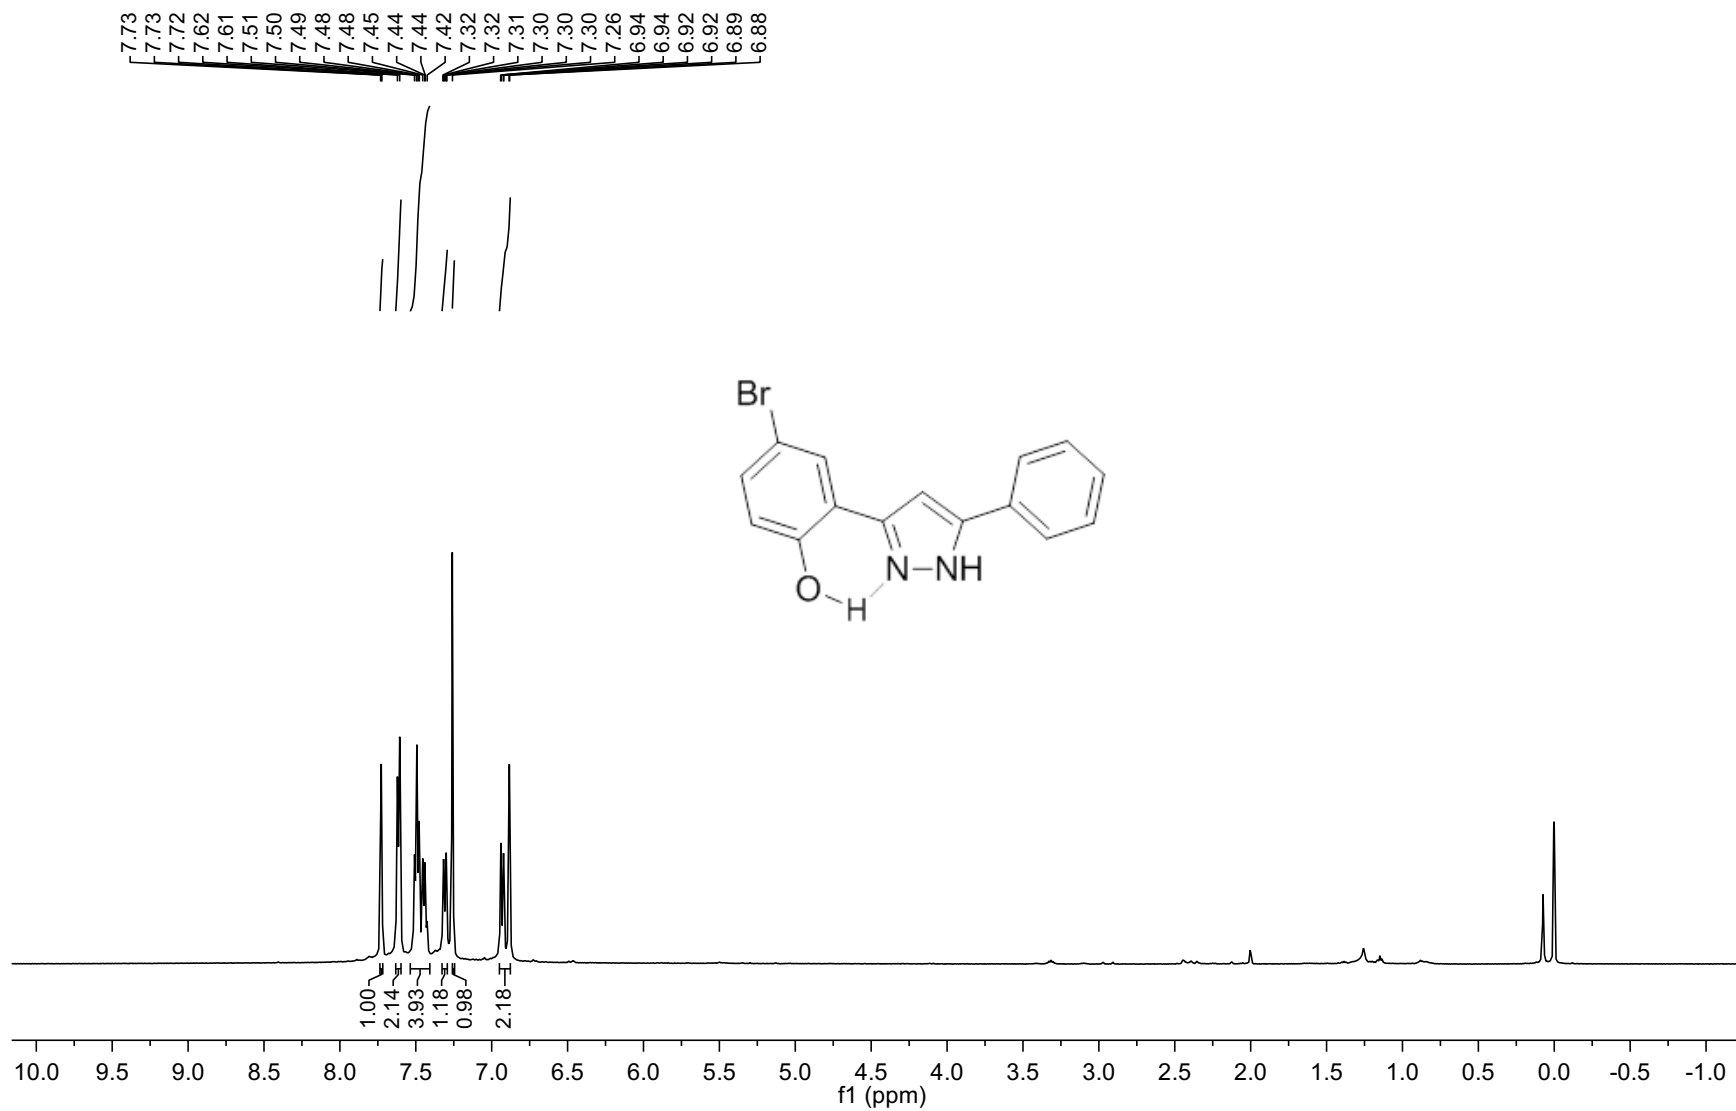

# $^{13}\text{C}$ NMR Spectroscopy of **4ha'**

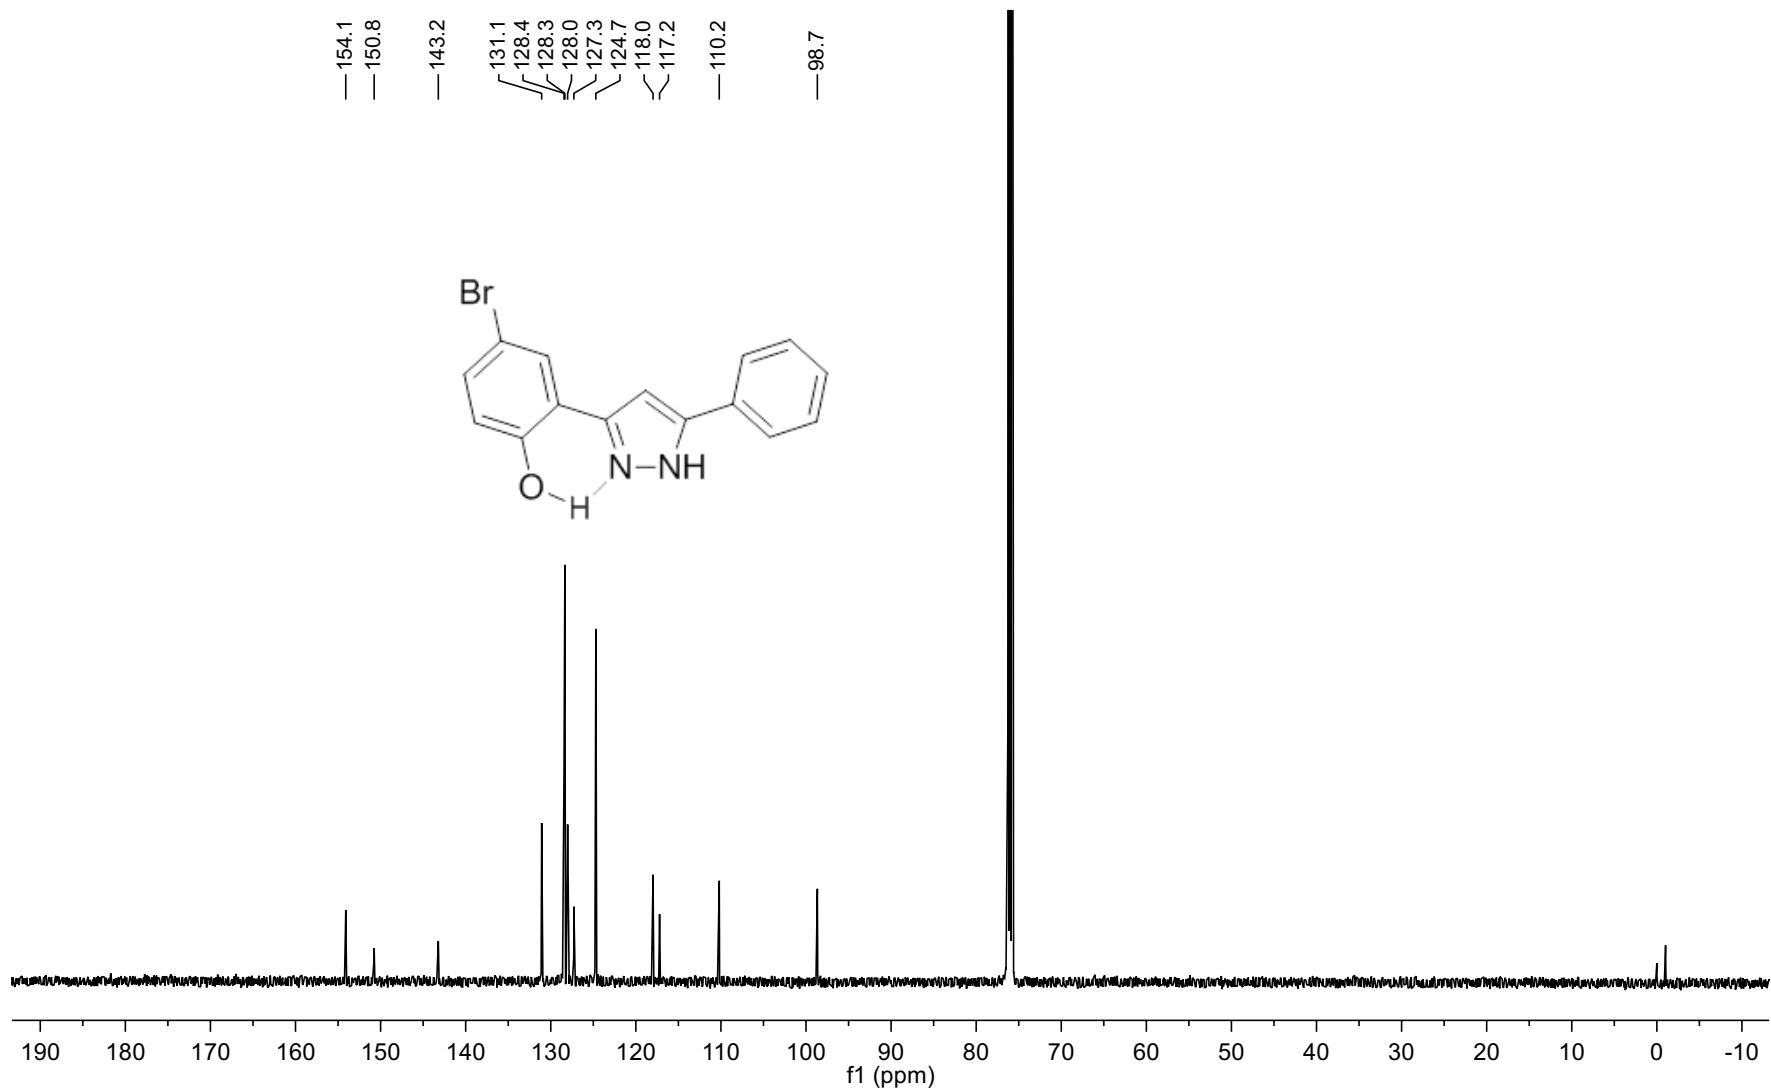

# $^1\text{H}$ NMR Spectroscopy of **4ia**

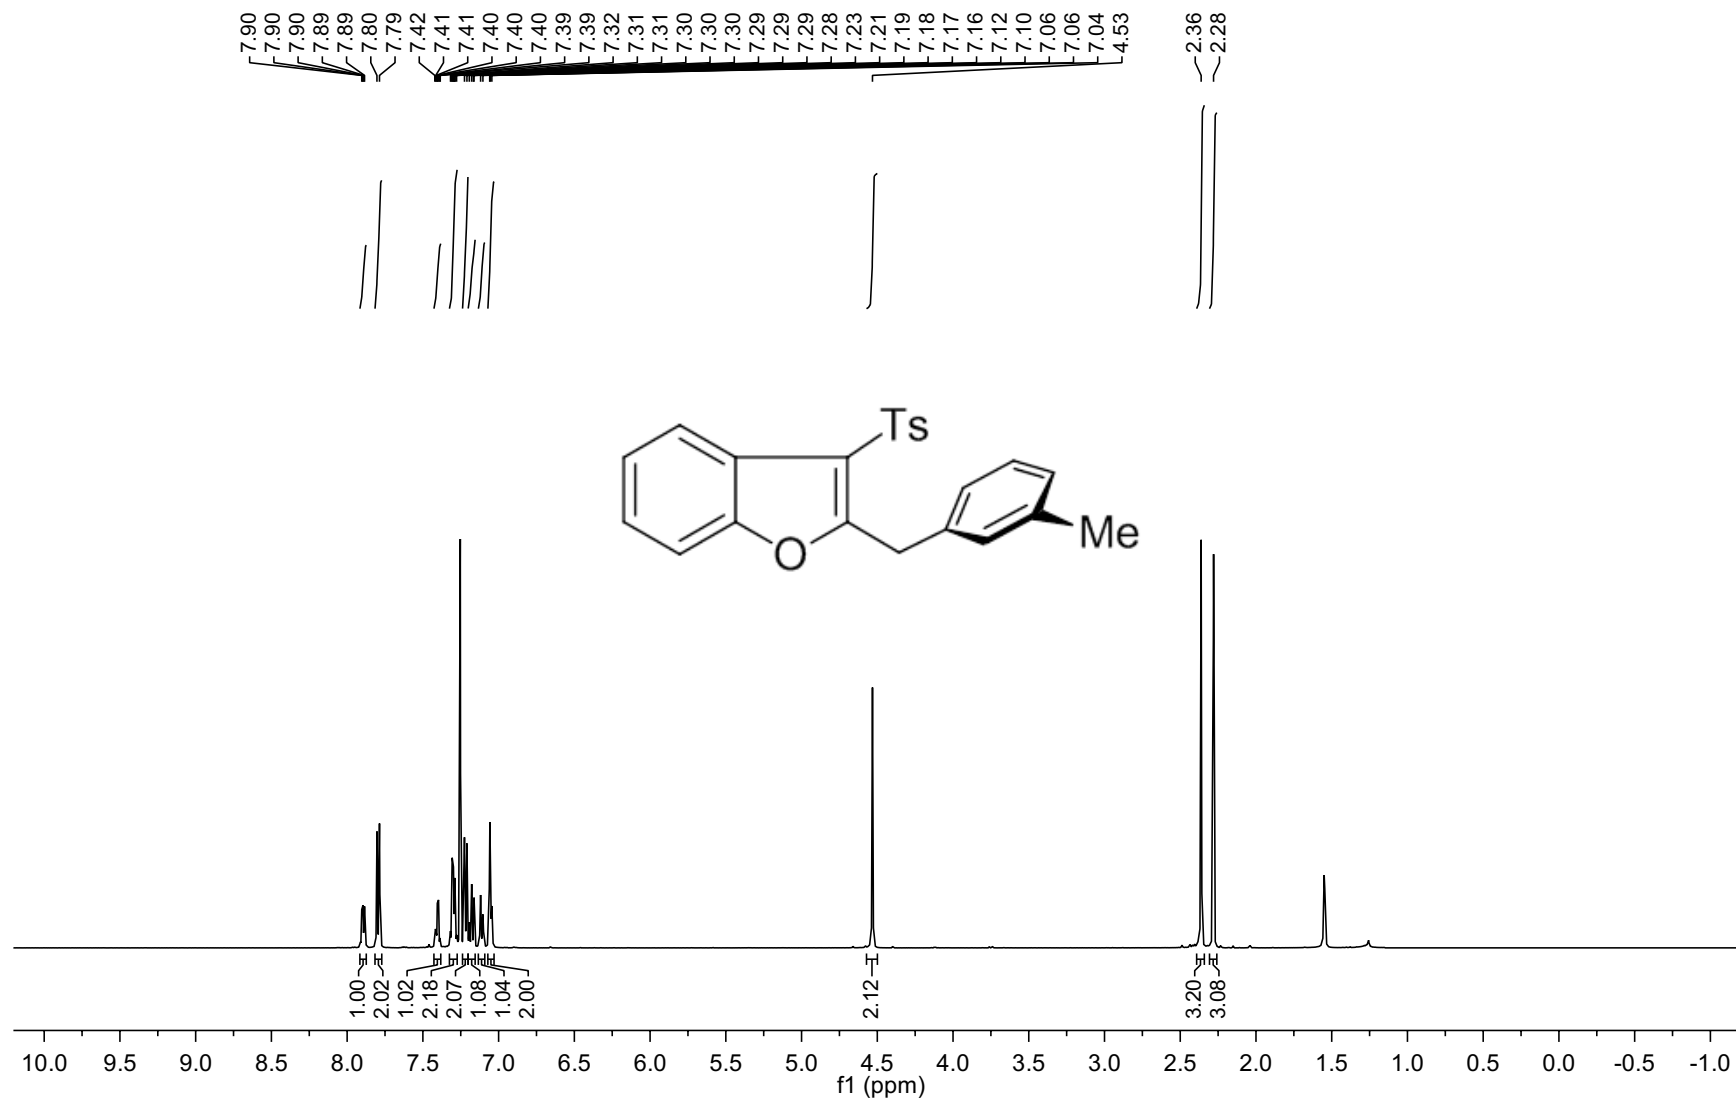

# $^{13}\text{C}$ NMR Spectroscopy of **4ia**

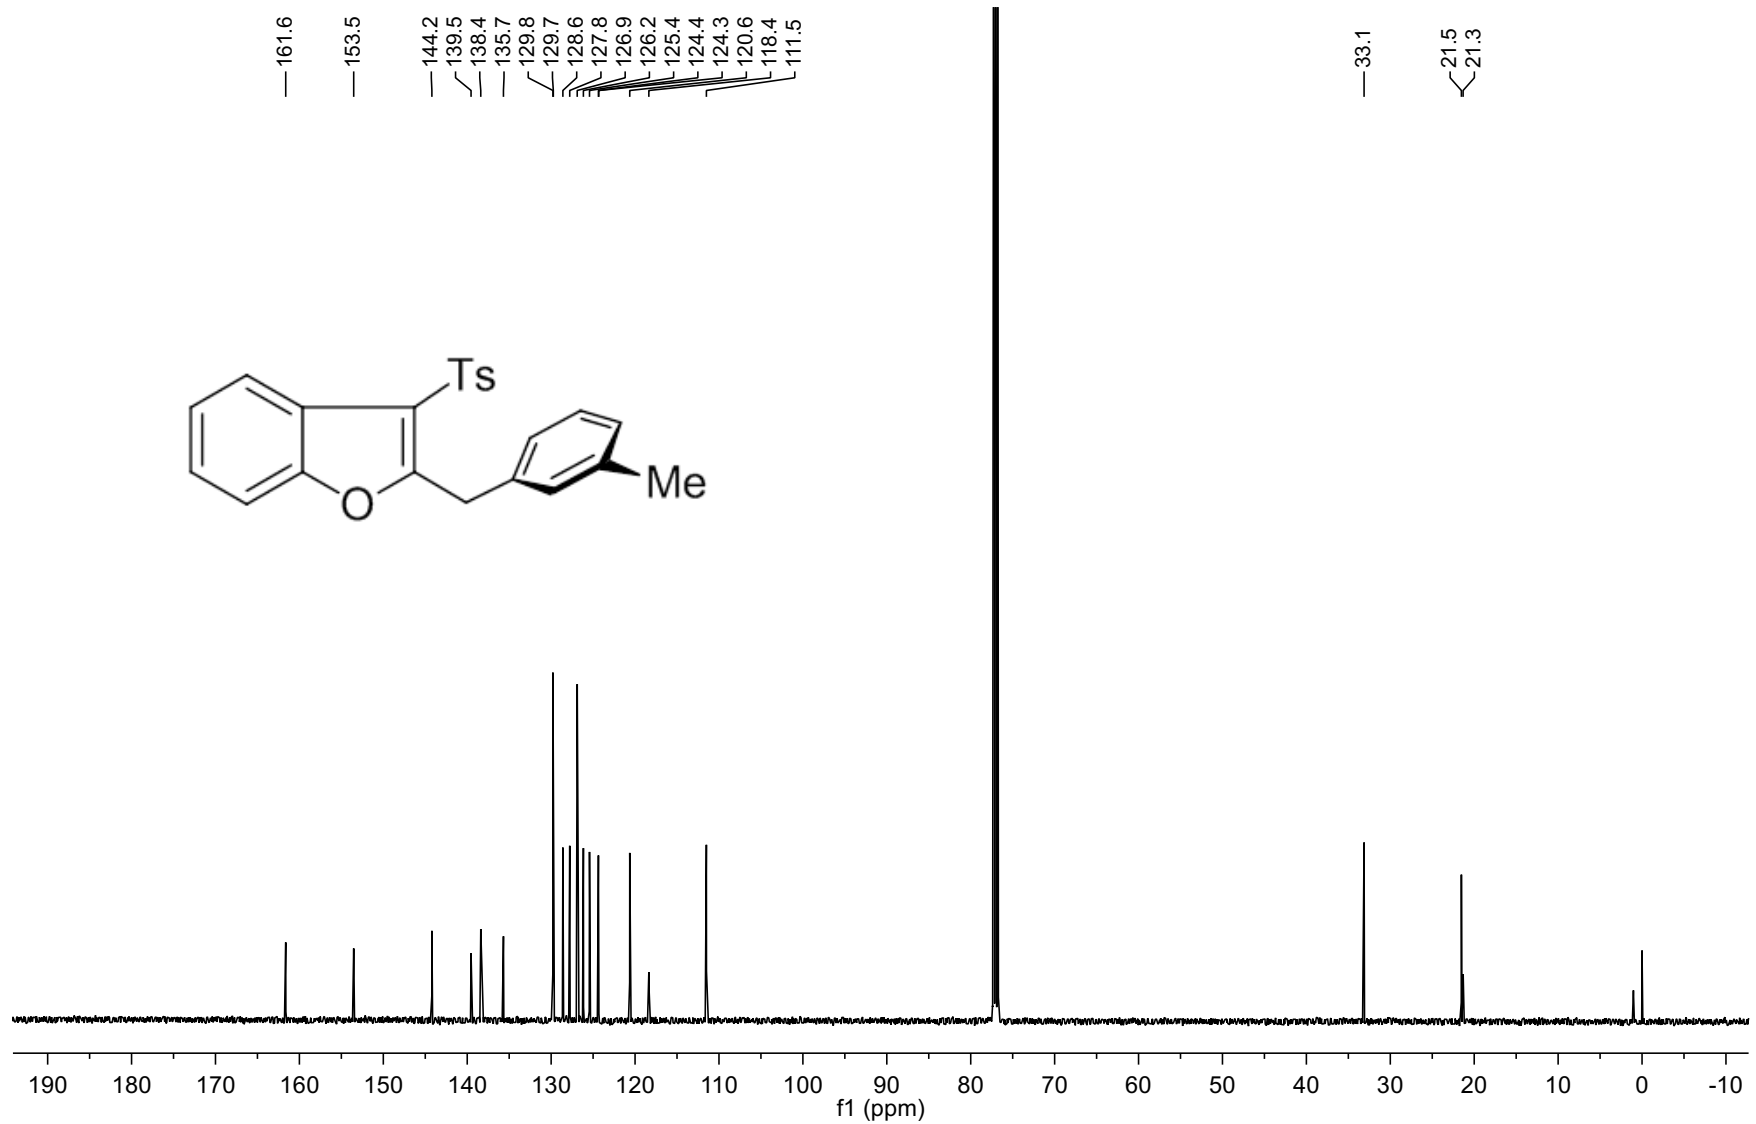

# $^1\text{H}$ NMR Spectroscopy of **4ja**

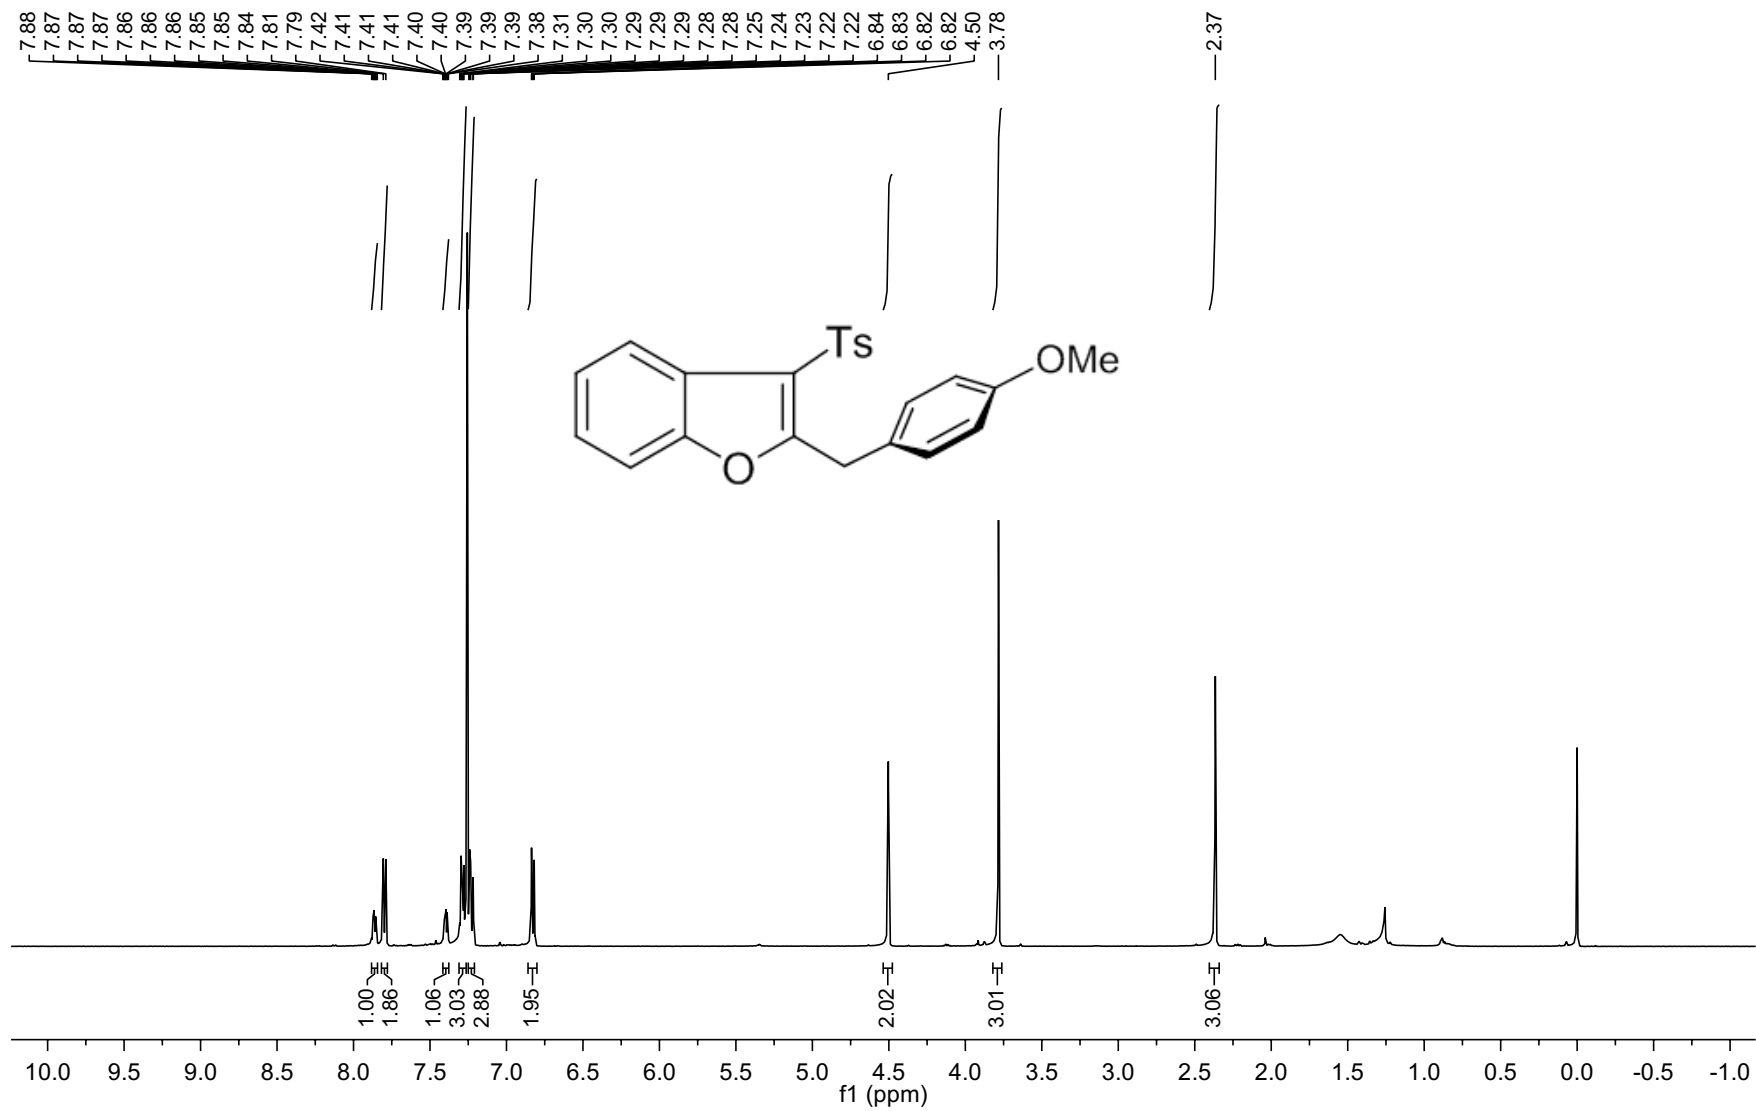

# $^{13}\text{C}$ NMR Spectroscopy of **4ja**

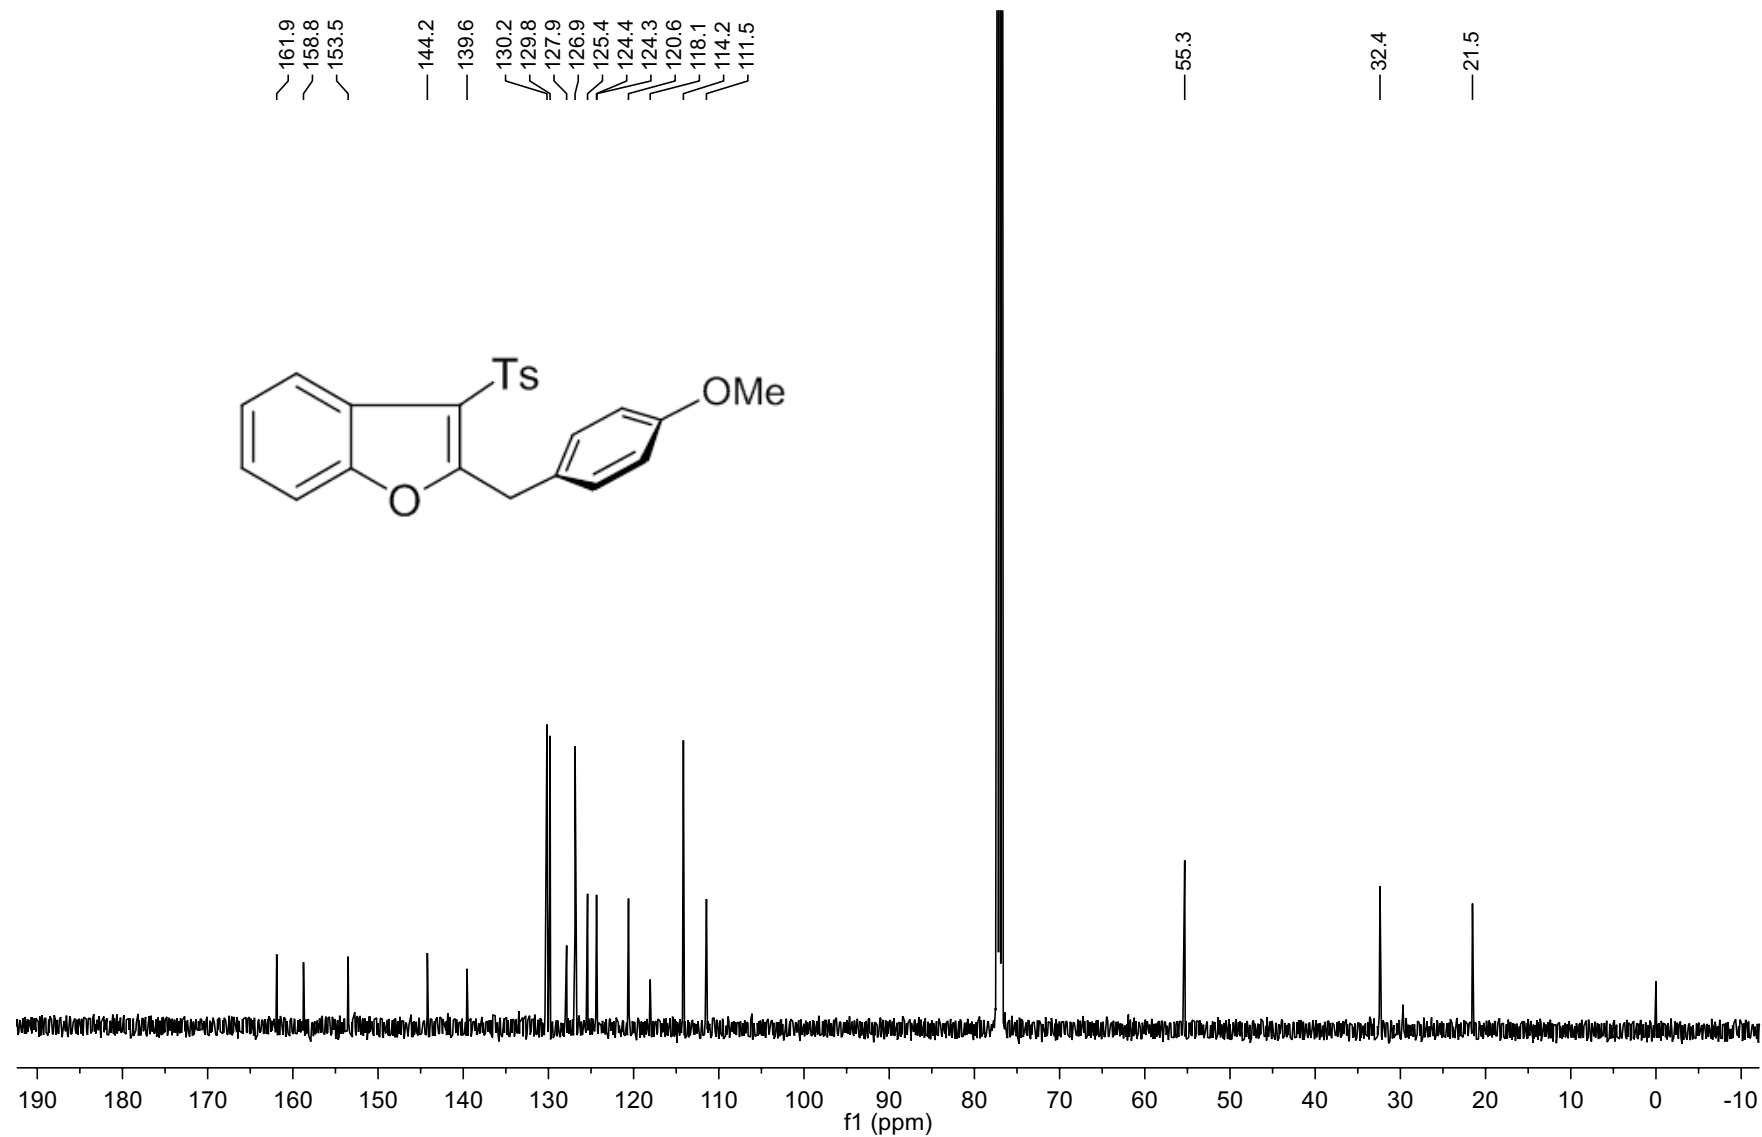

# $^1\text{H}$ NMR Spectroscopy of **4ka**

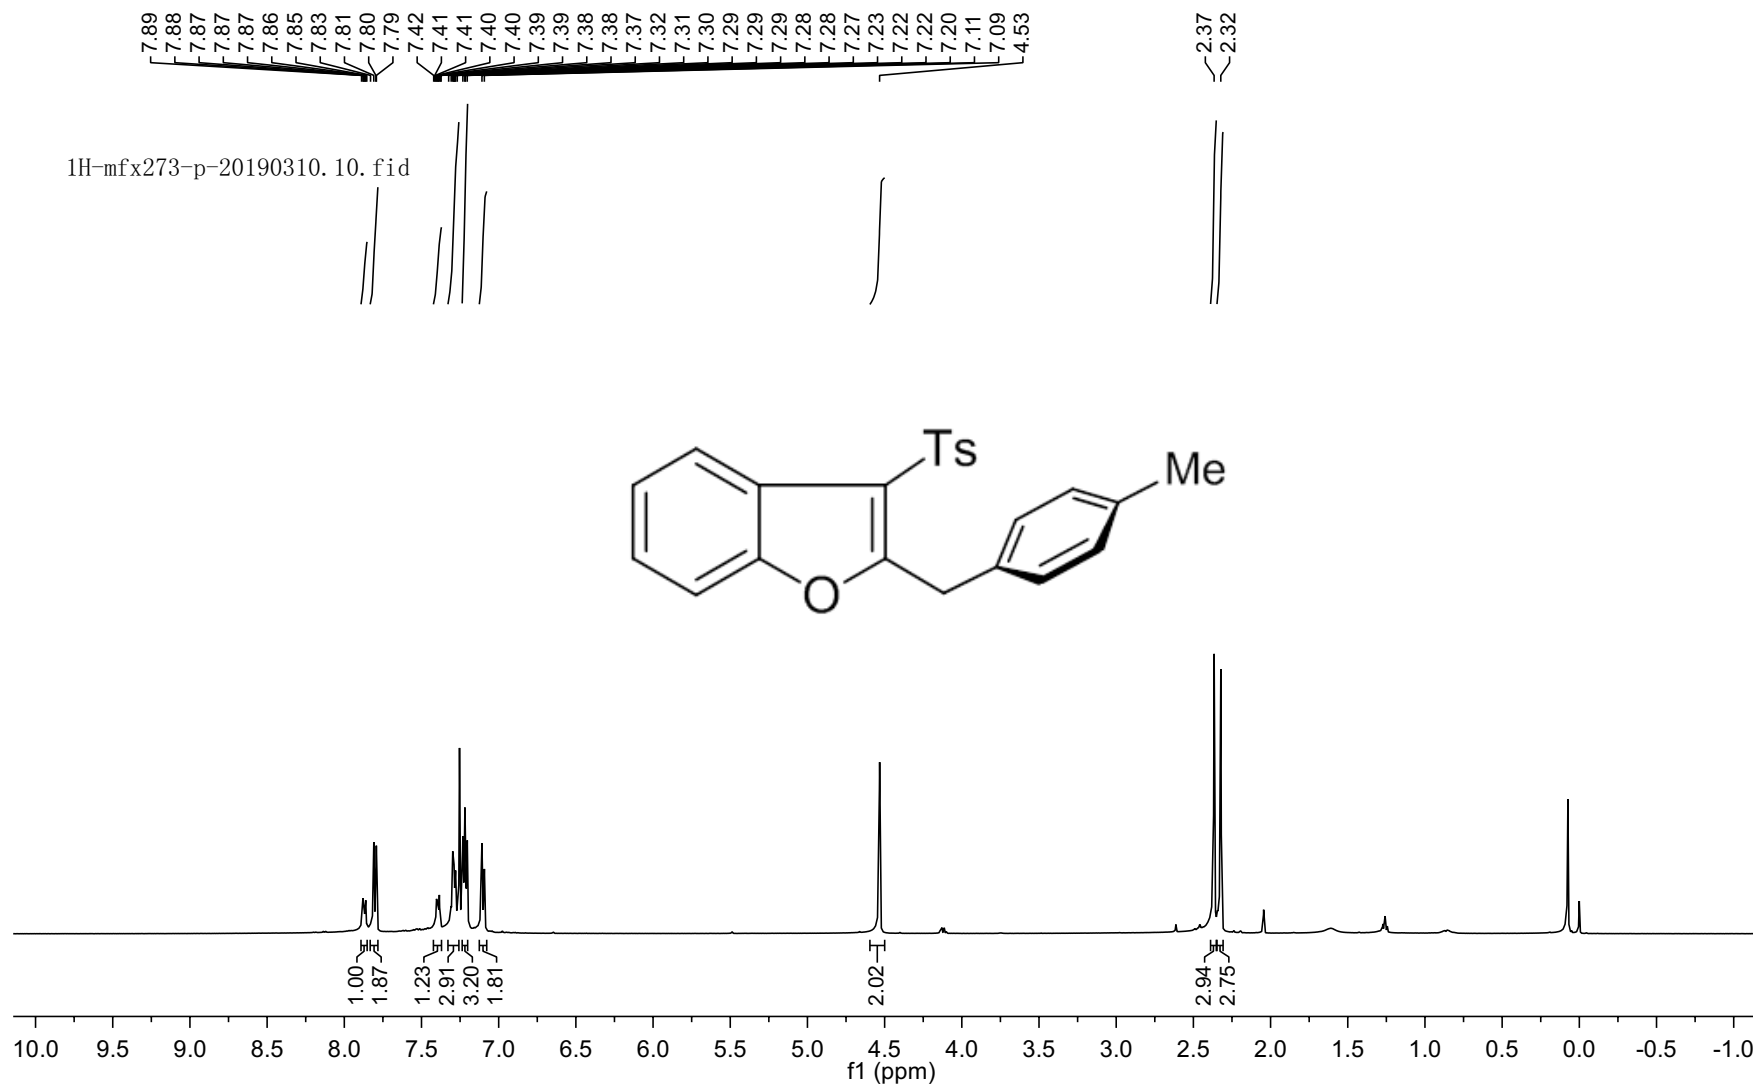

# $^{13}\text{C}$ NMR Spectroscopy of **4ka**

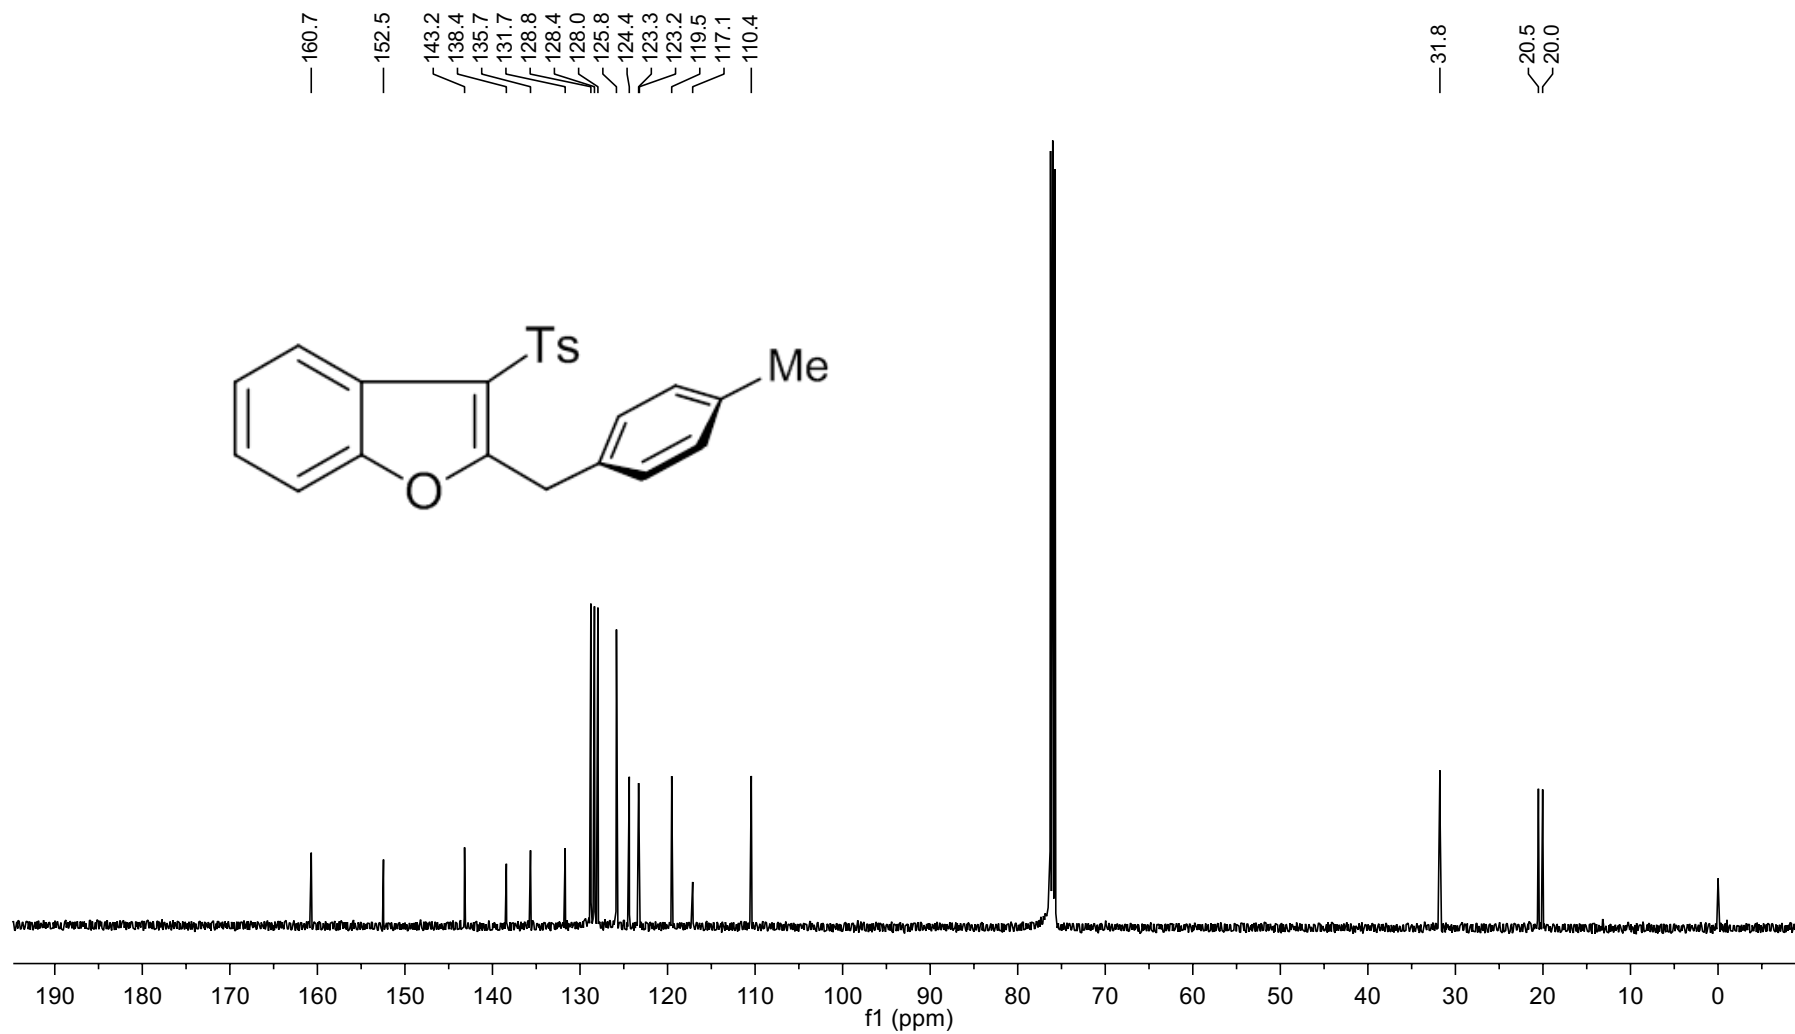



# $^1\text{H}$ NMR Spectroscopy of **4la**

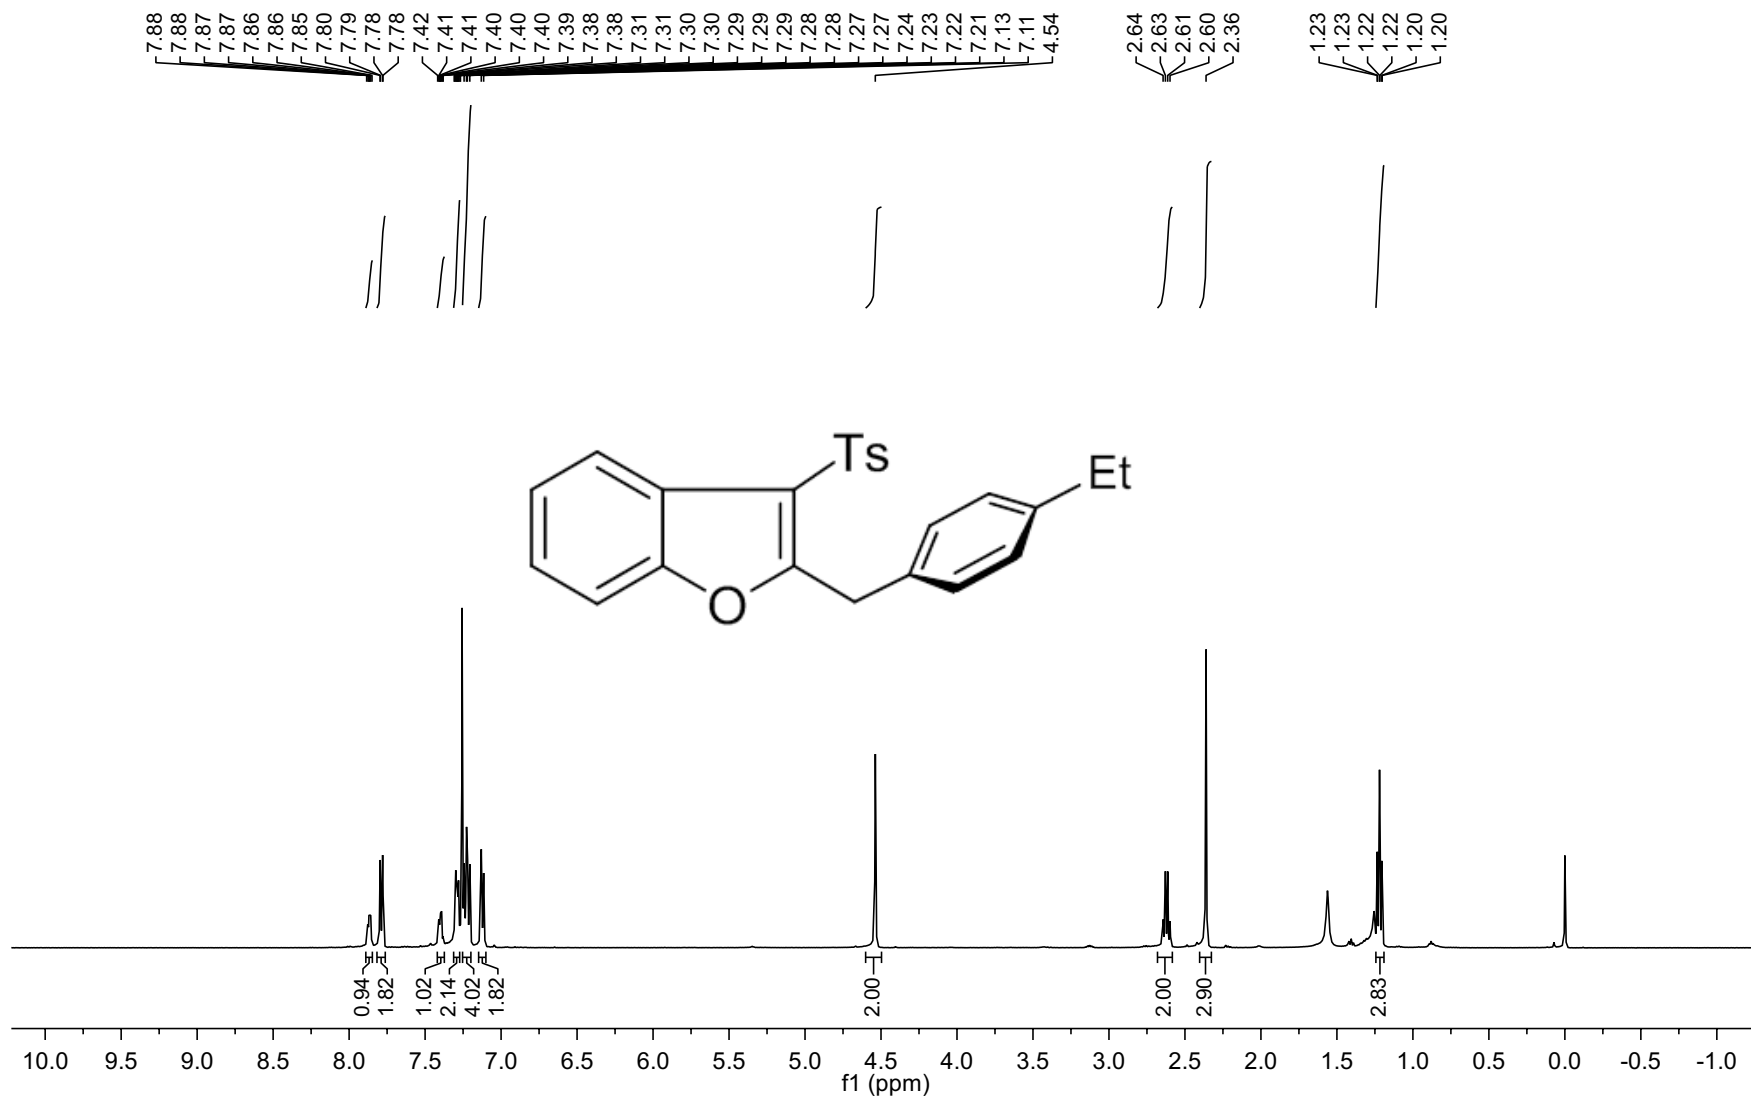

# $^{13}\text{C}$ NMR Spectroscopy of **4a**

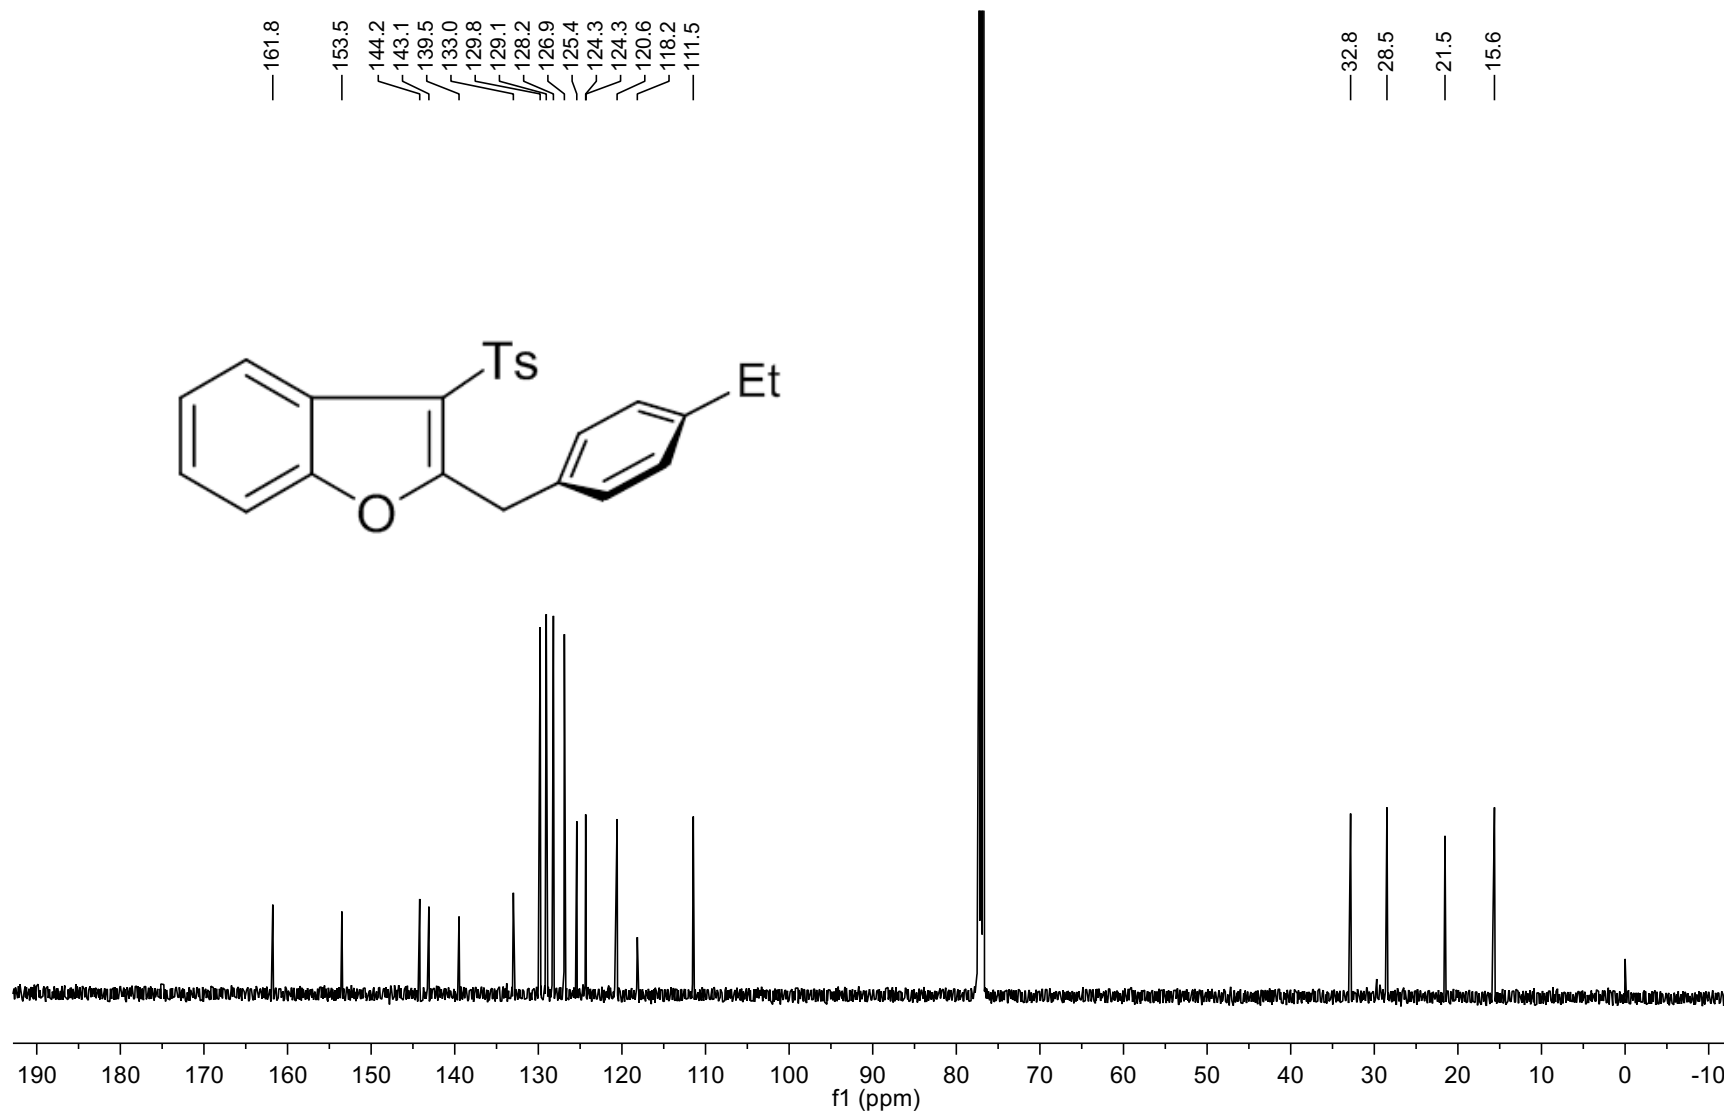

# $^1\text{H}$ NMR Spectroscopy of 4ma

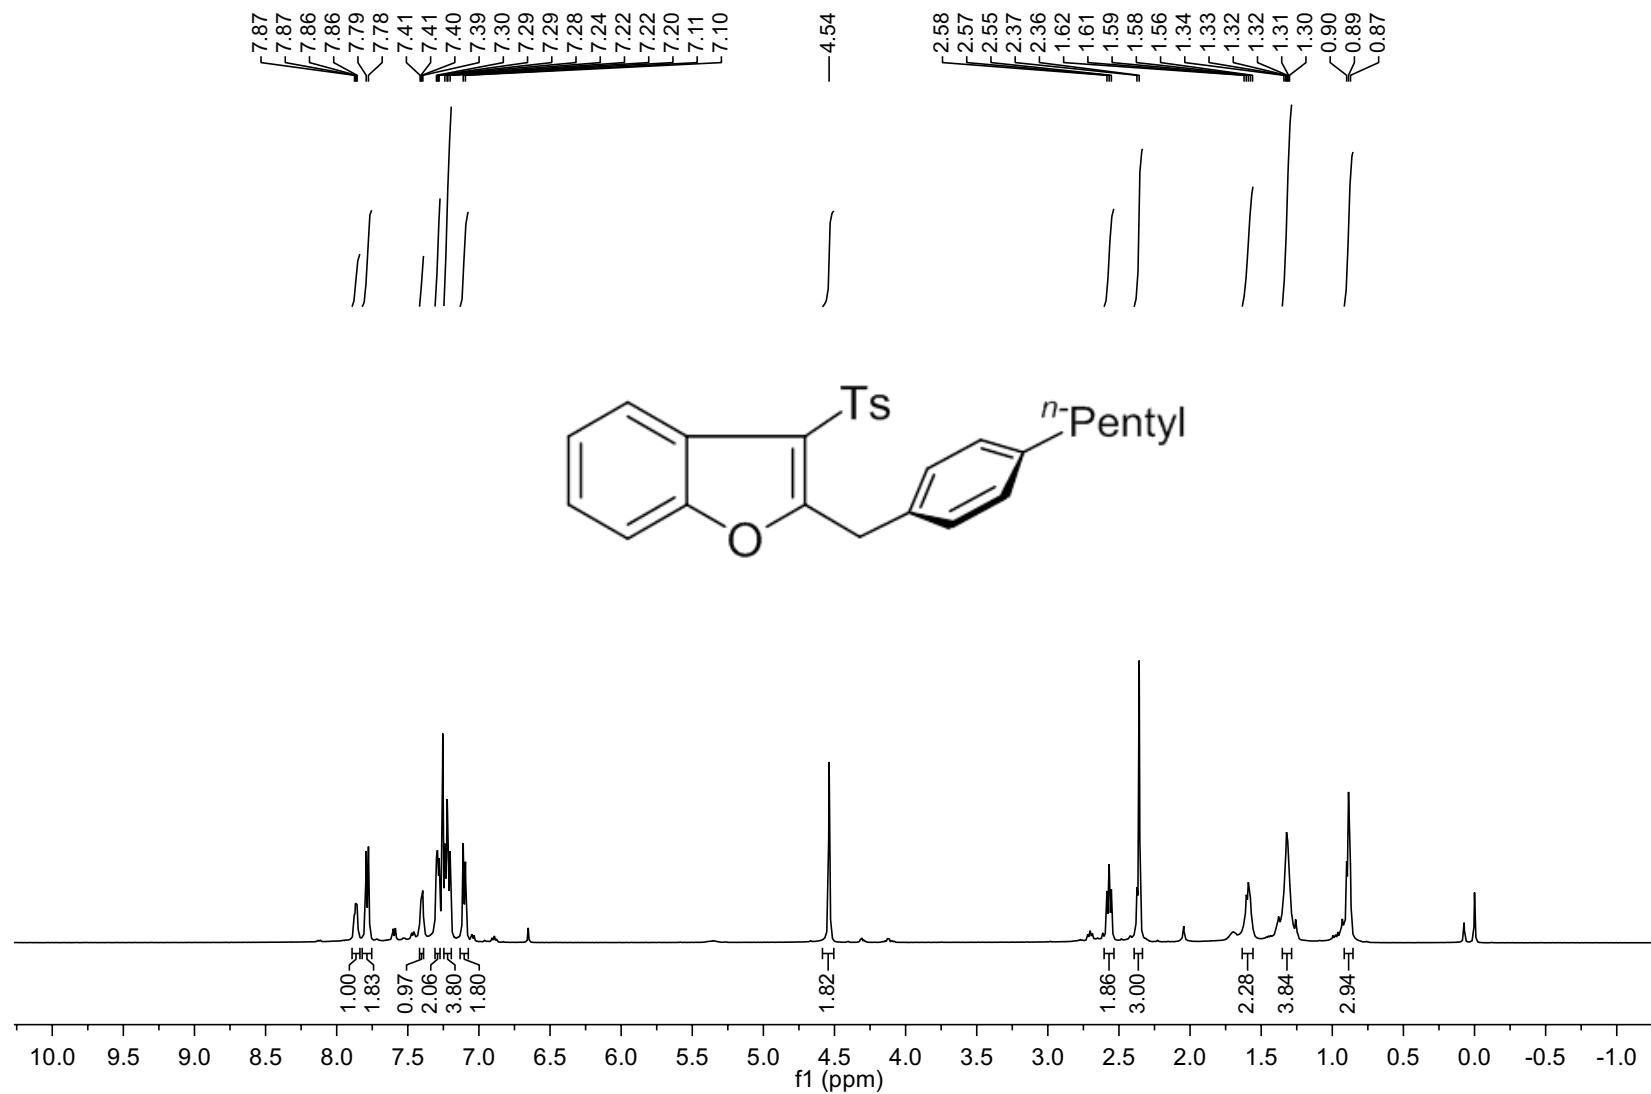

# $^{13}\text{C}$ NMR Spectroscopy of 4ma

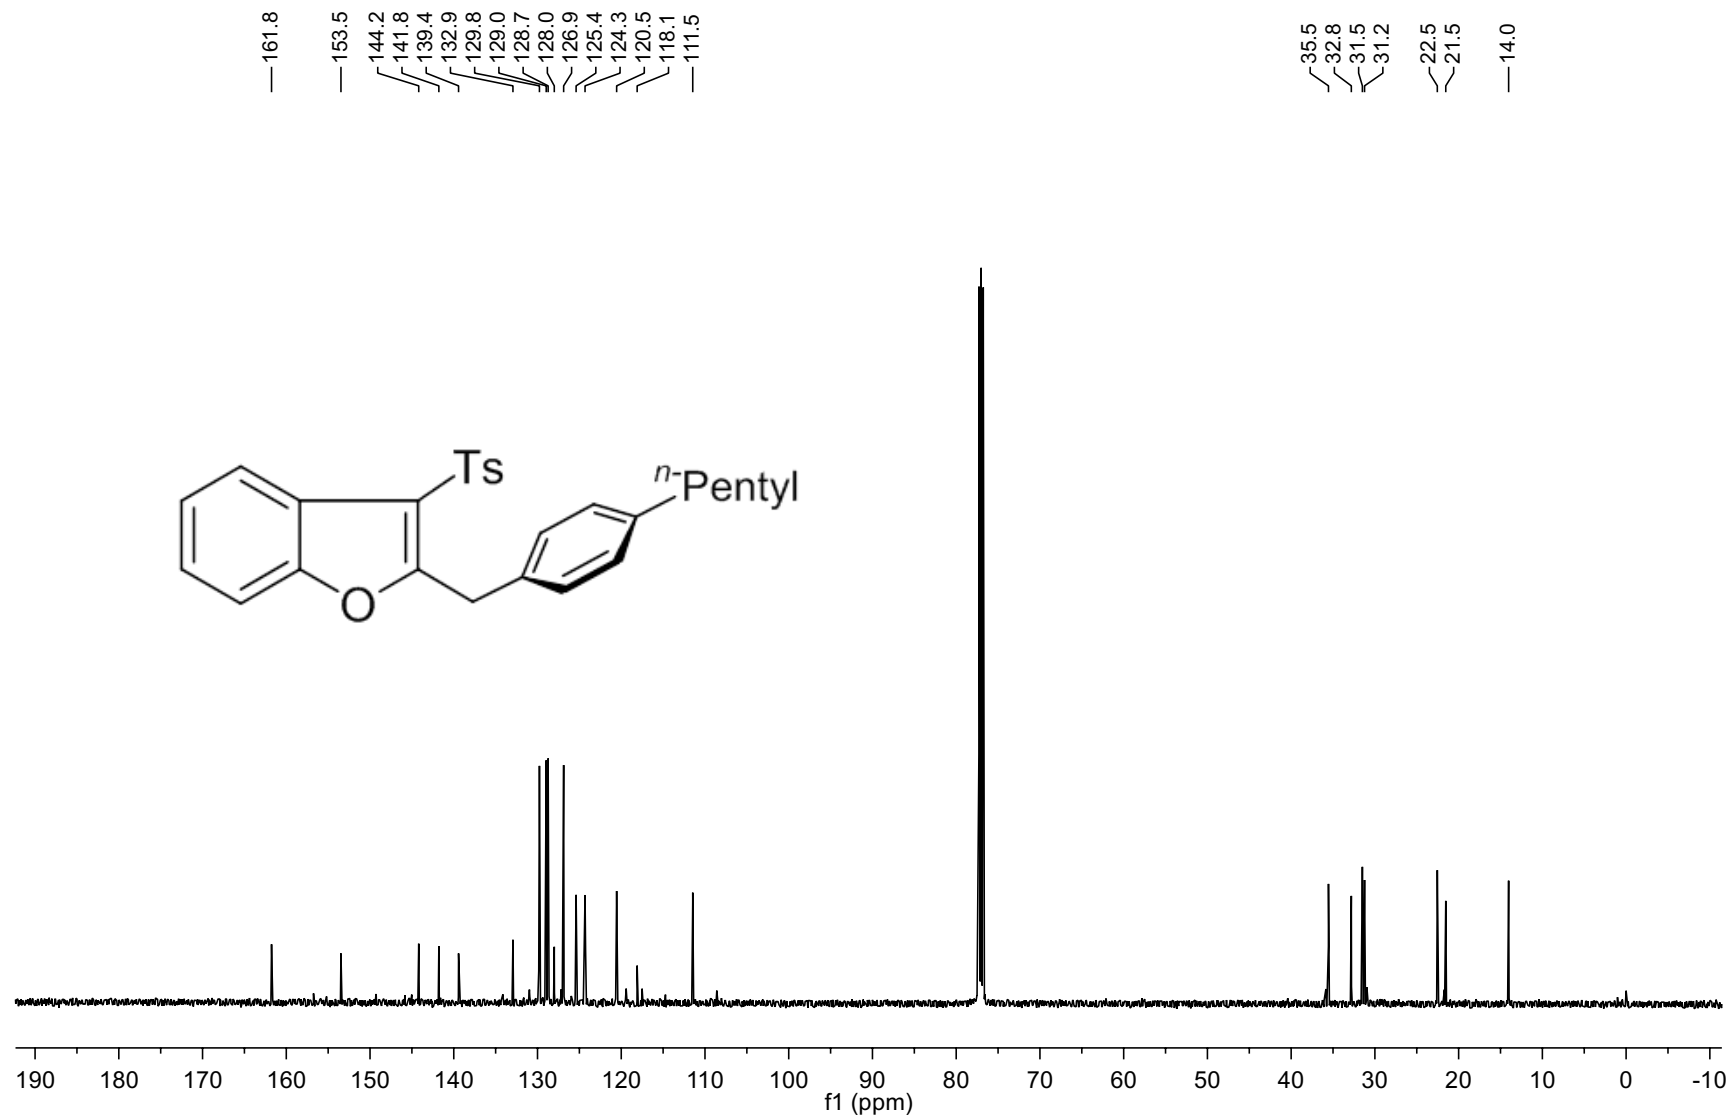

# $^1\text{H}$ NMR Spectroscopy of 4ma'

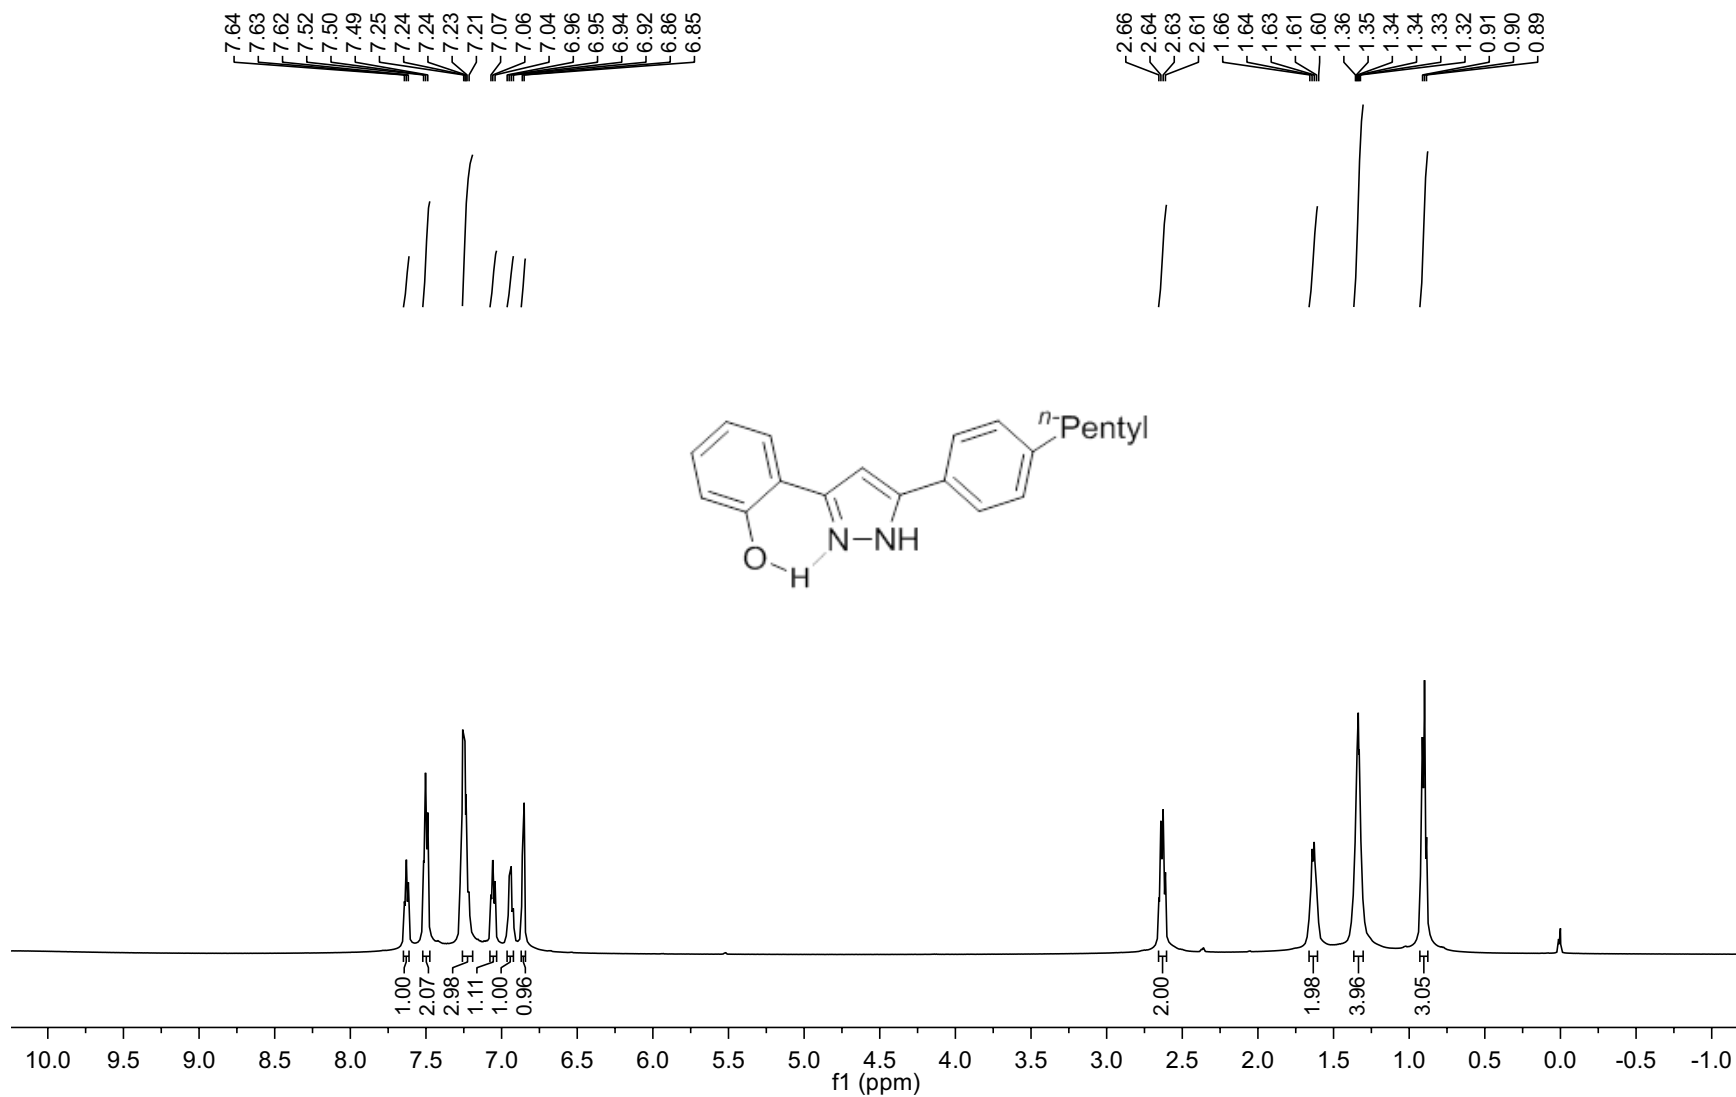

# $^{13}\text{C}$ NMR Spectroscopy of 4ma'

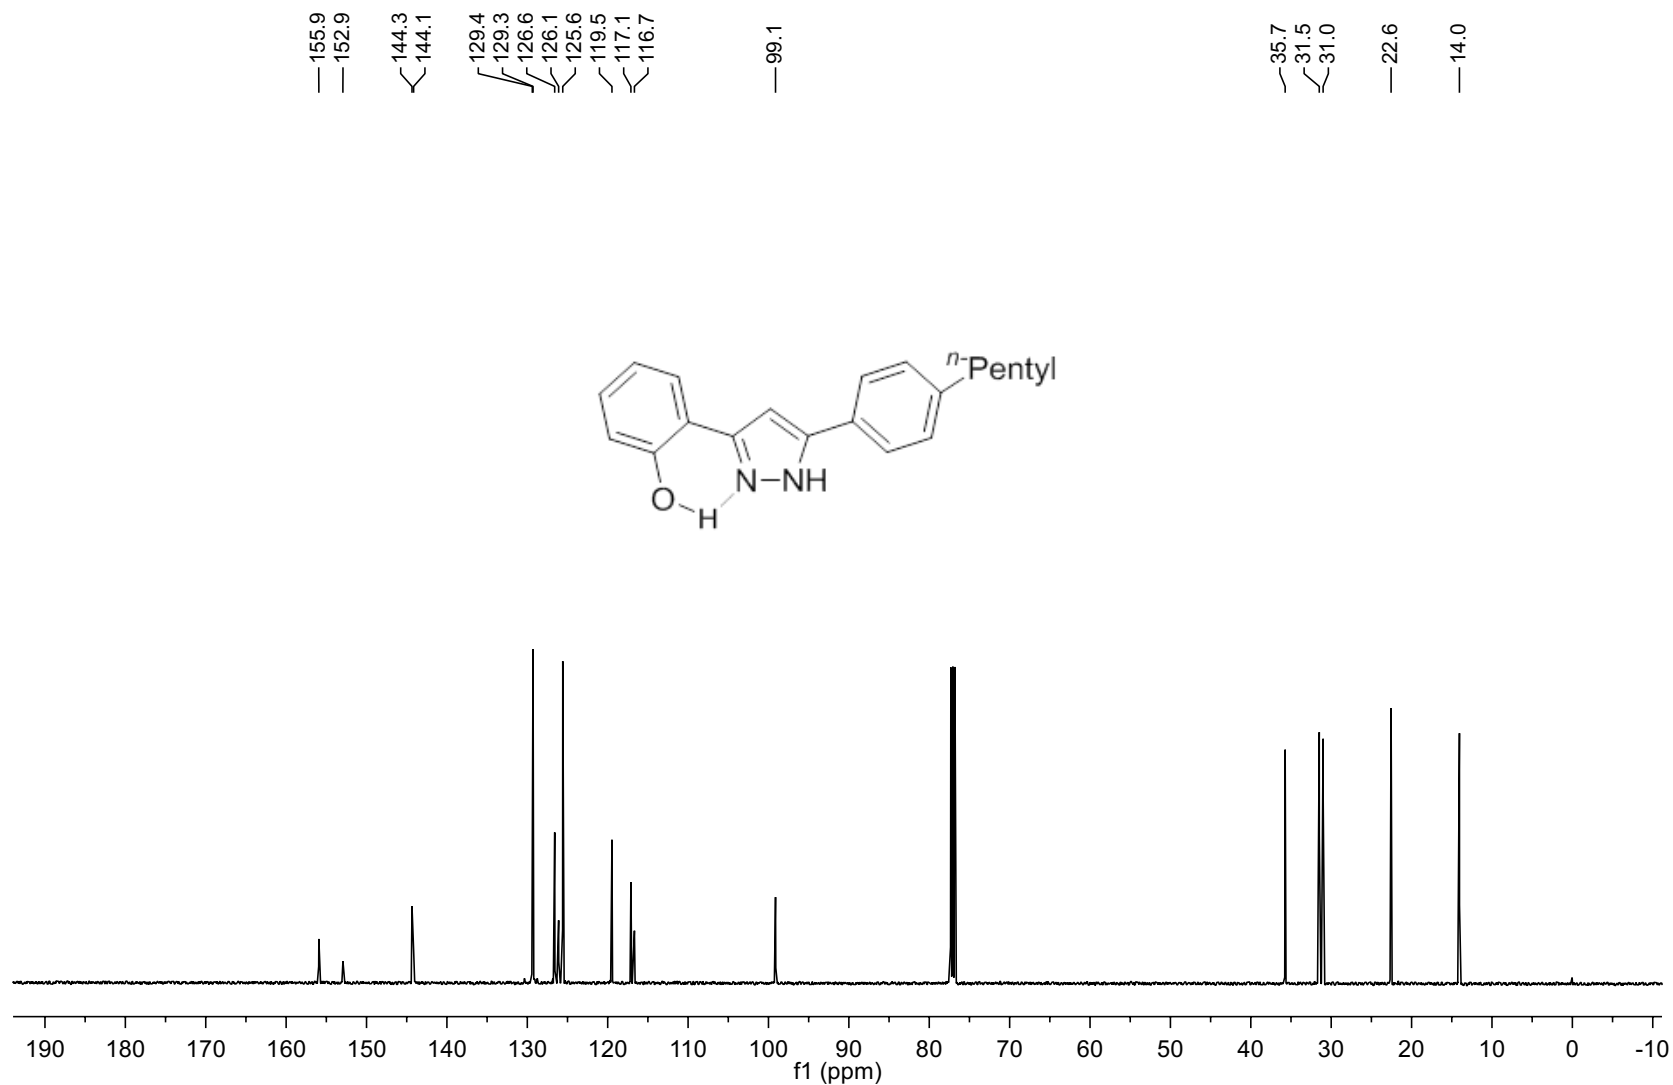

# $^1\text{H}$ NMR Spectroscopy of **4na**

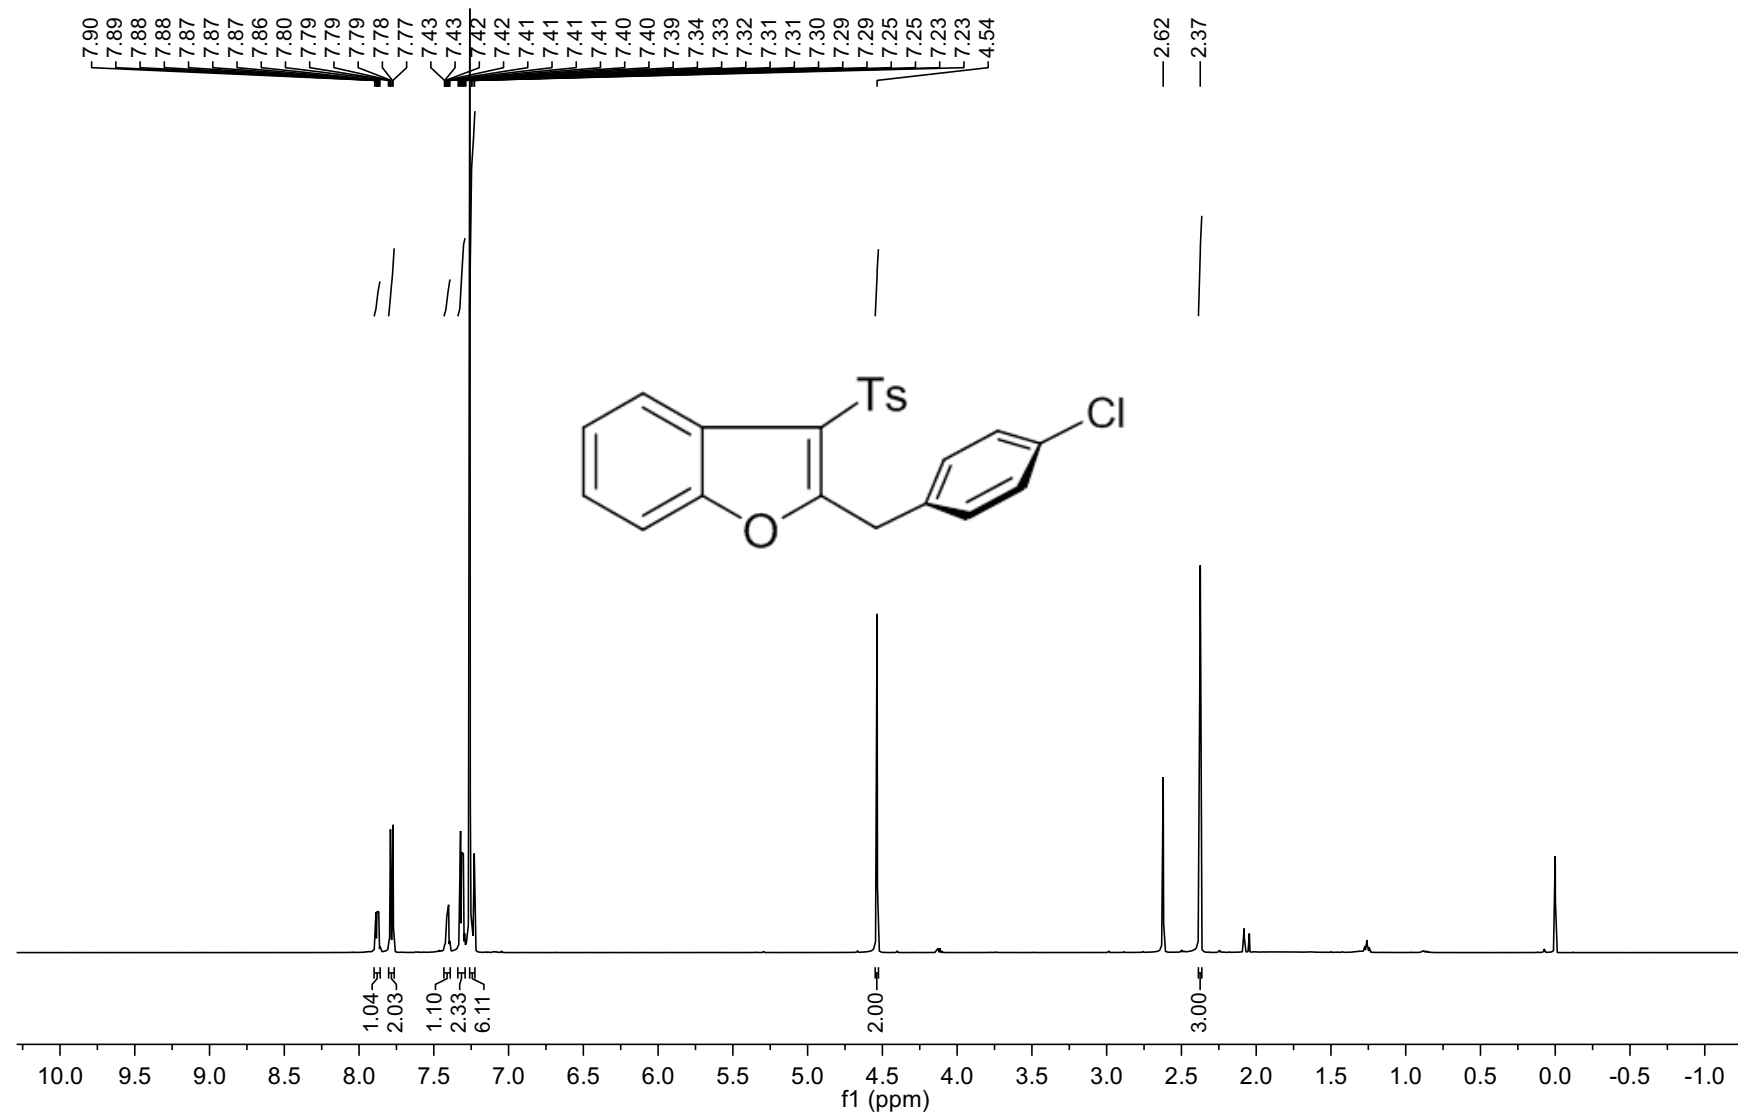

# $^{13}\text{C}$ NMR Spectroscopy of **4na**

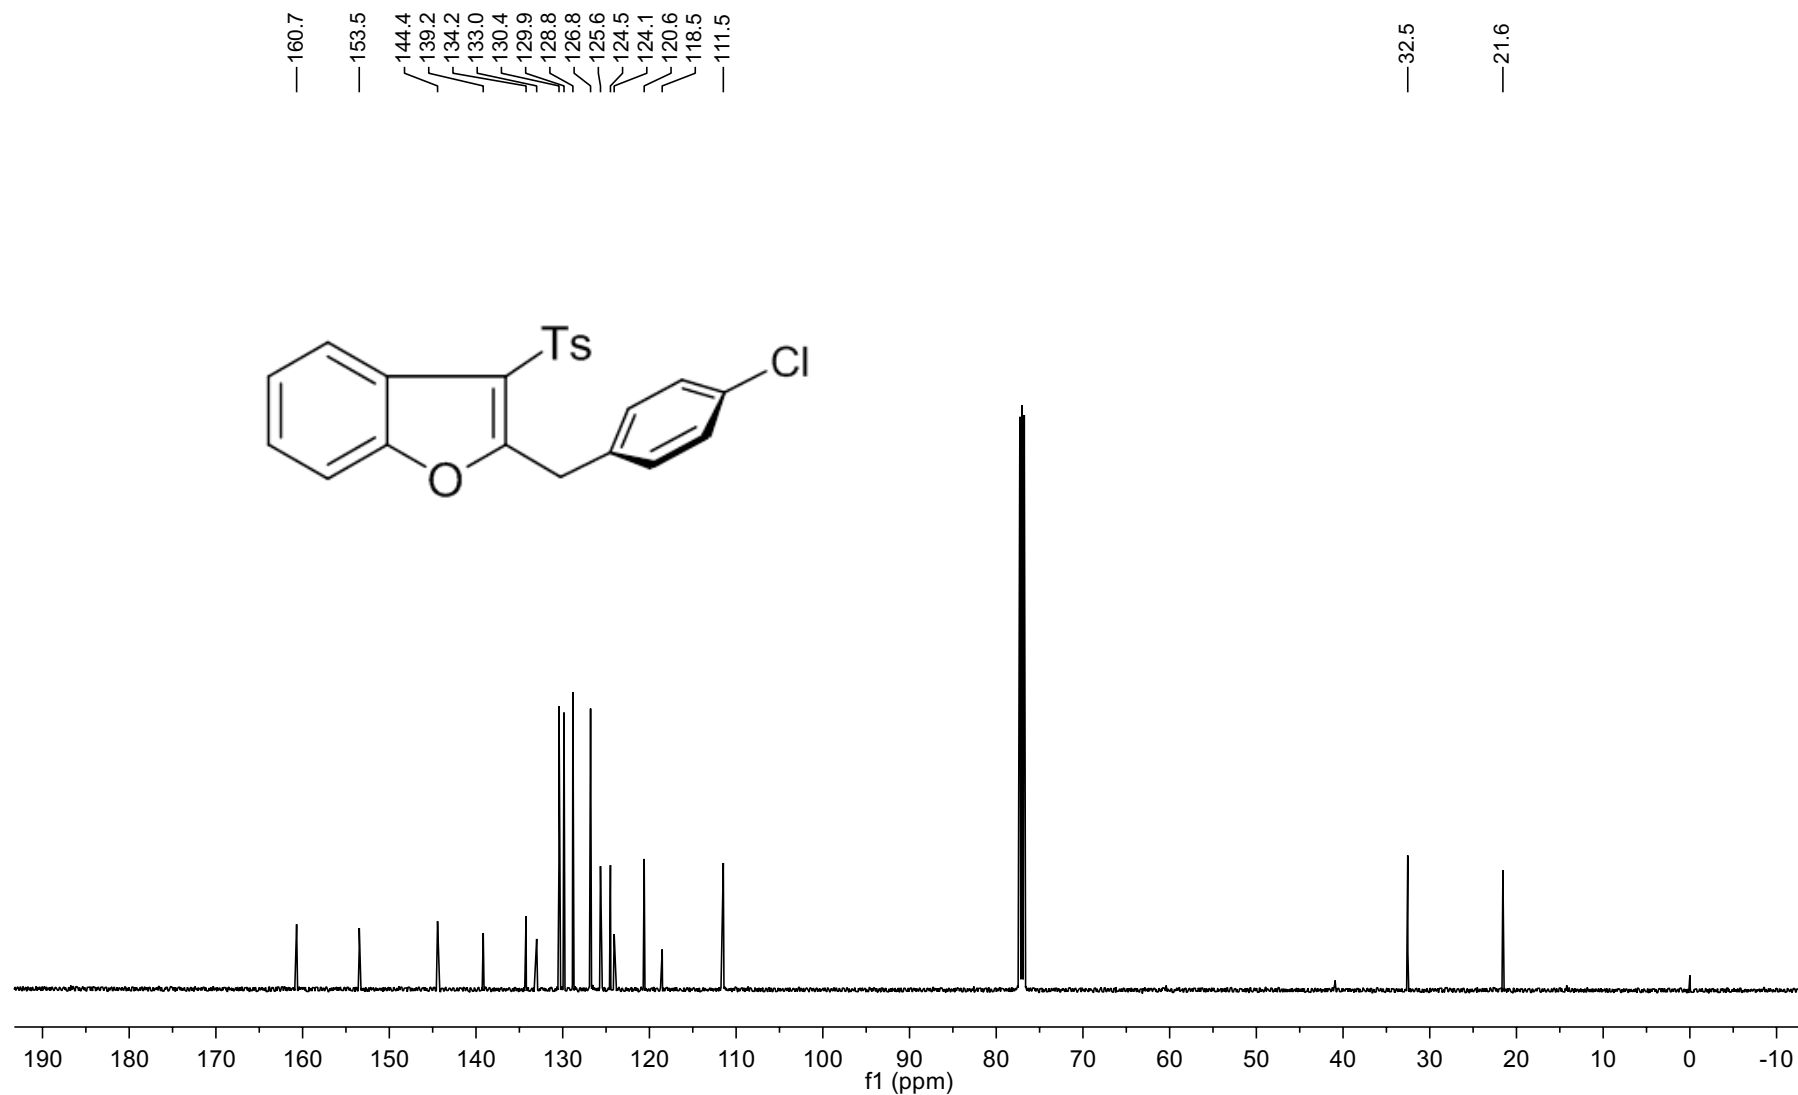



# $^1\text{H}$ NMR Spectroscopy of 4na'

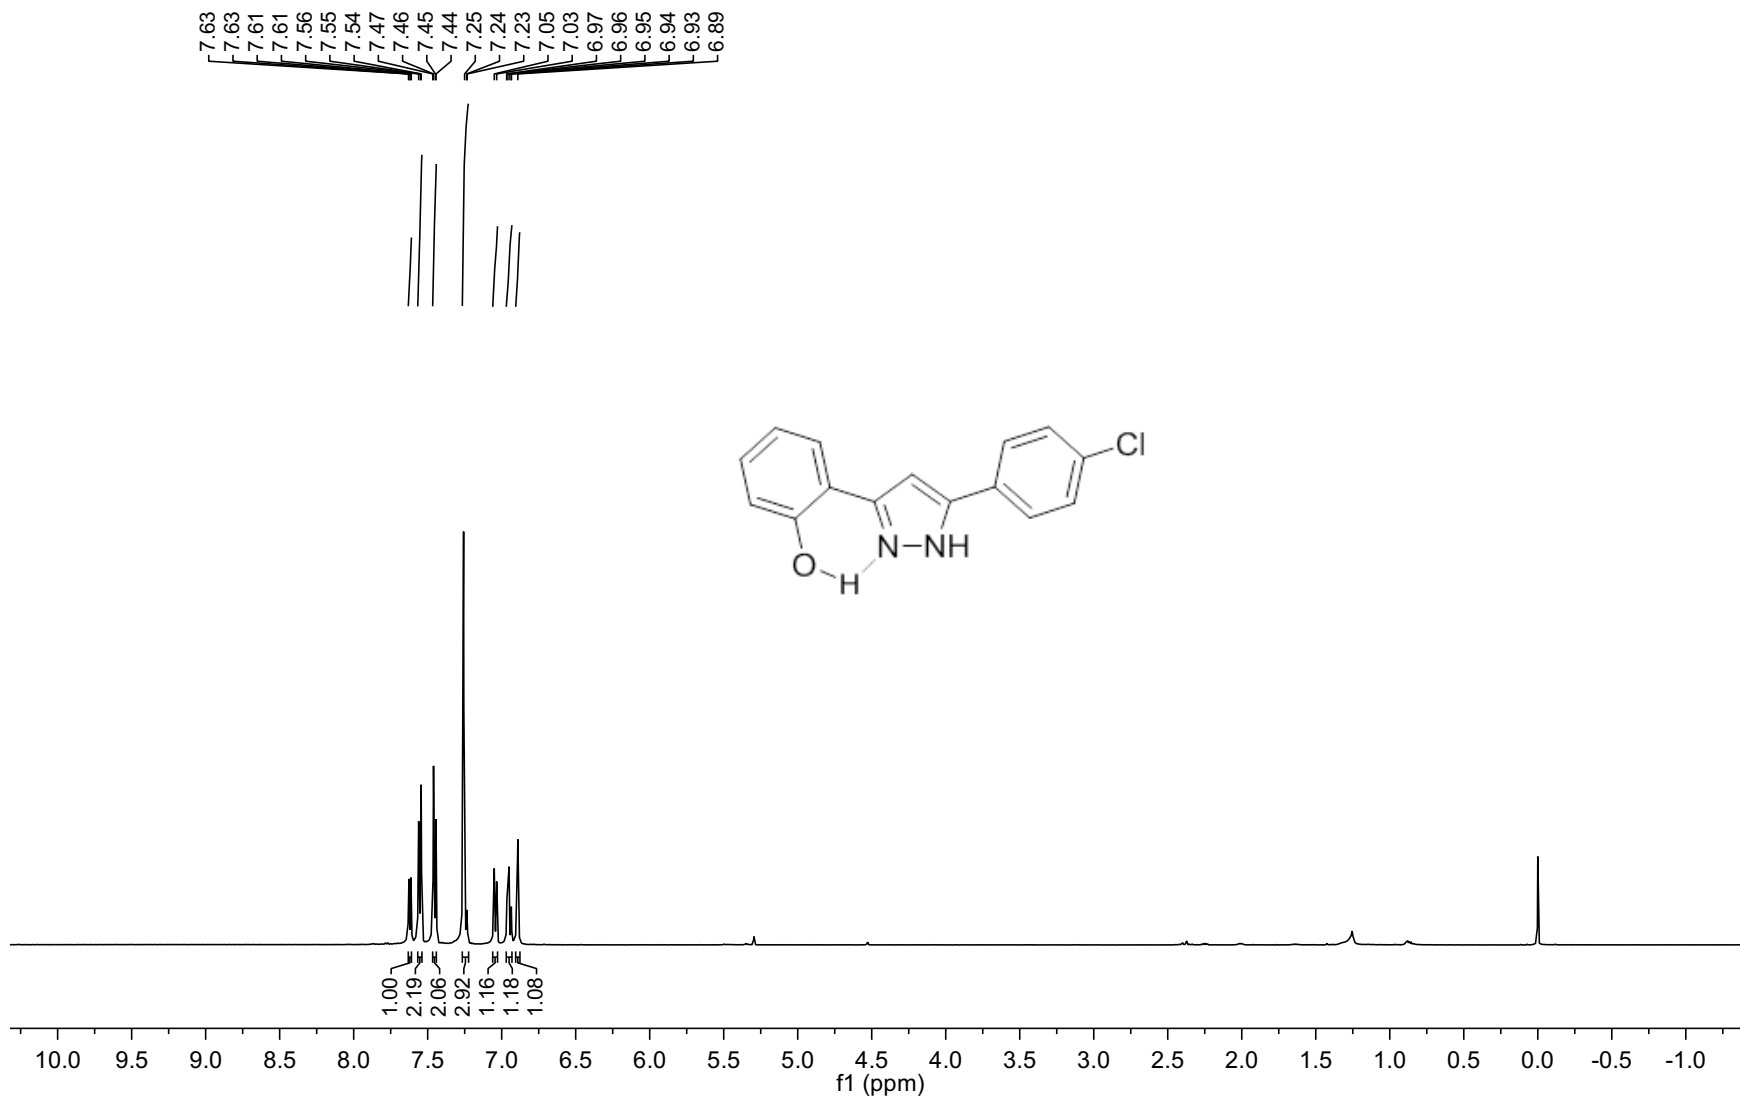

# $^{13}\text{C}$ NMR Spectroscopy of 4na'

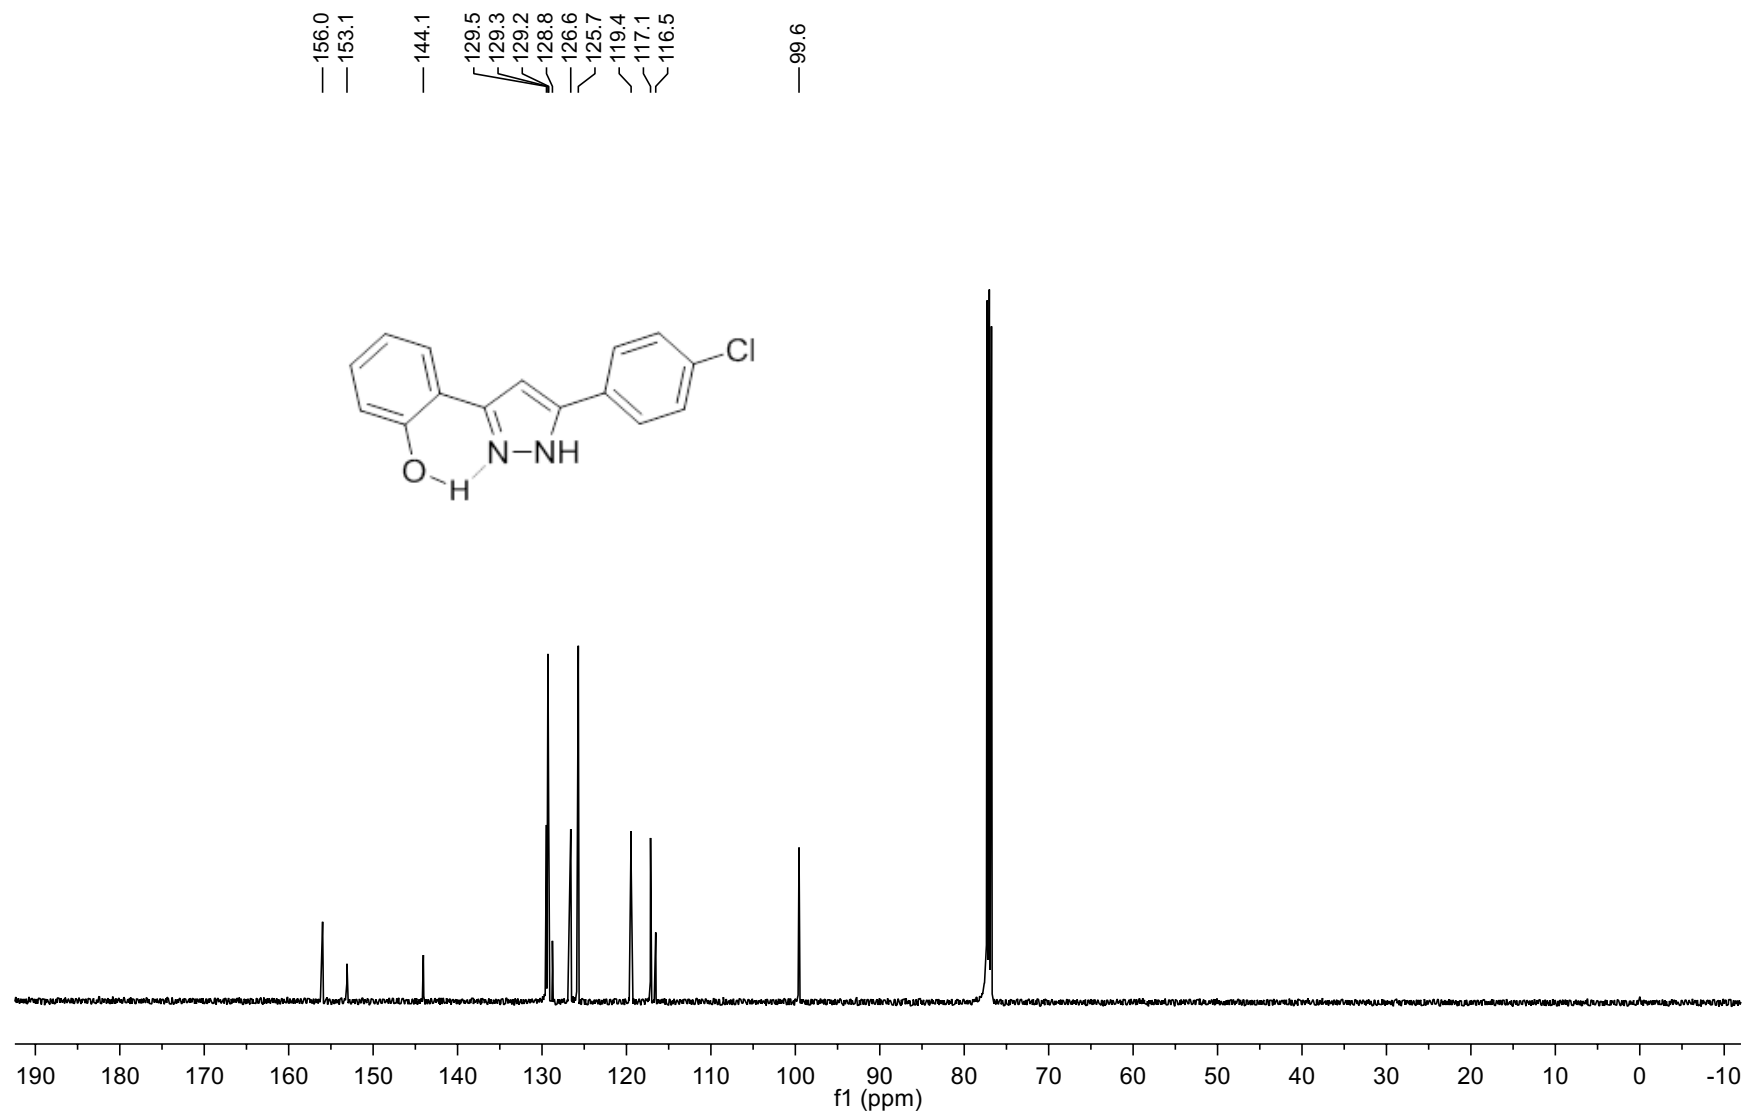

# $^1\text{H}$ NMR Spectroscopy of 4oa

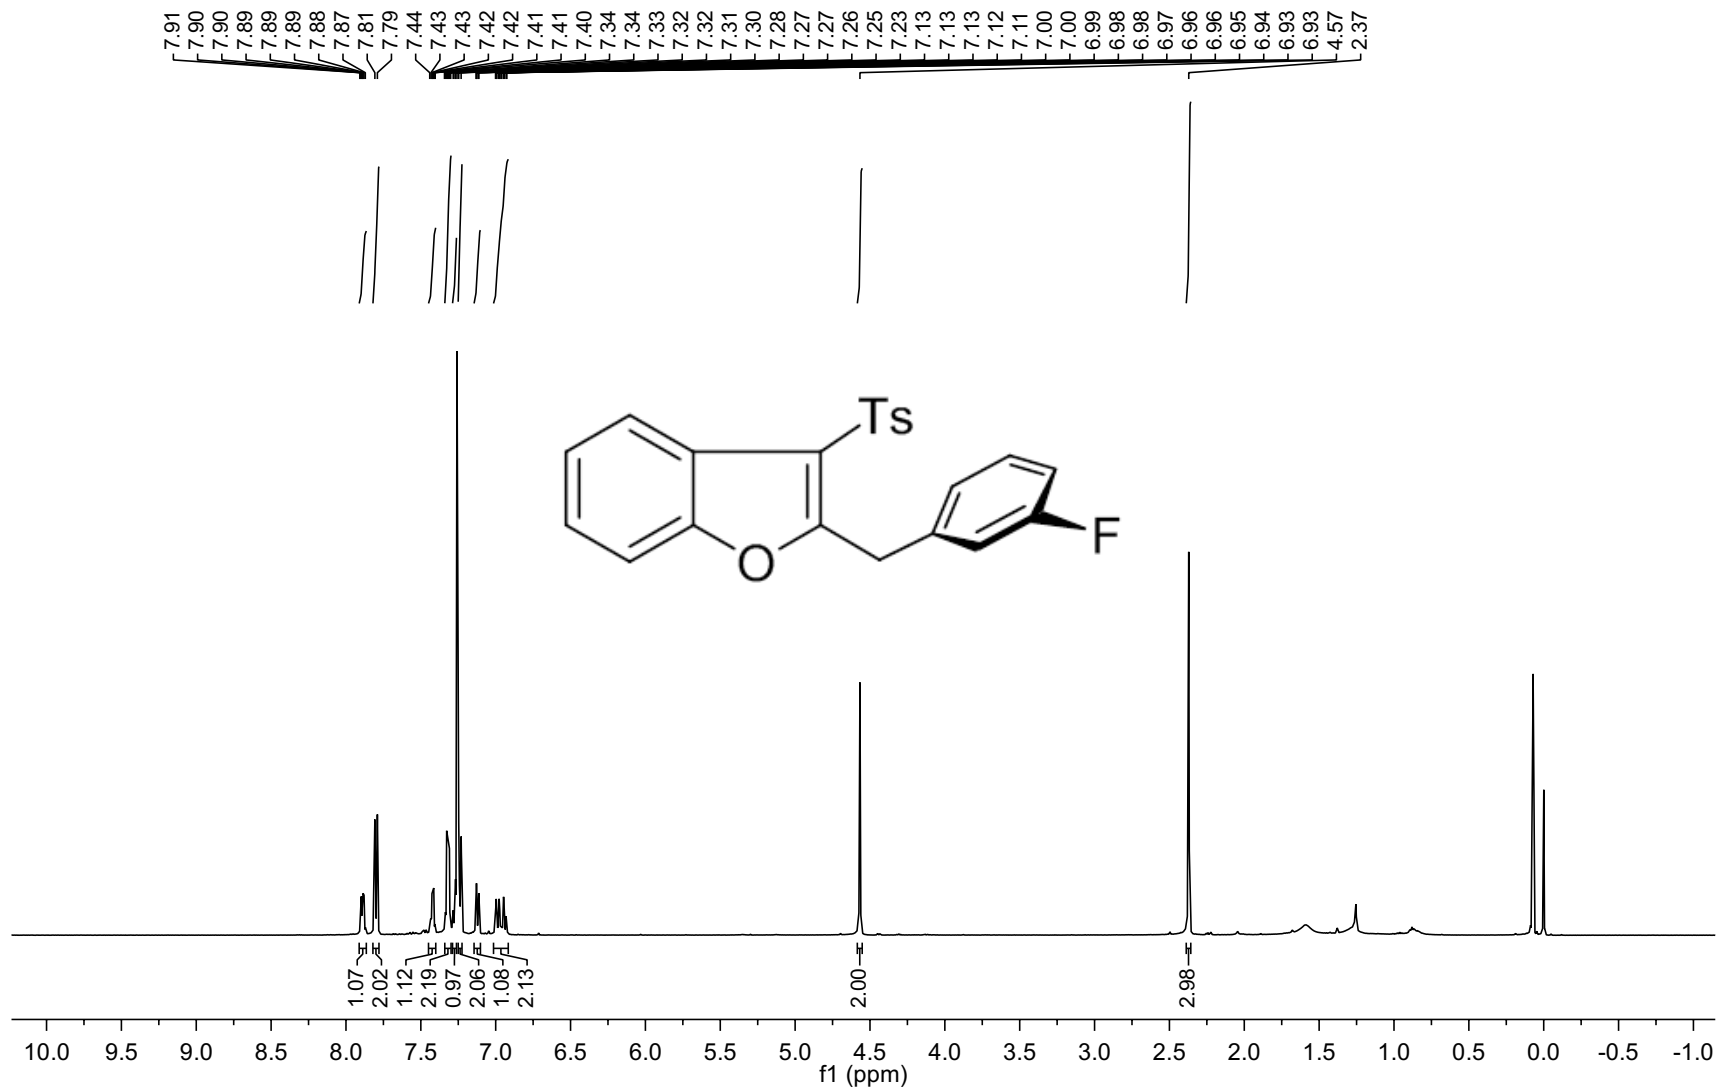

# $^{13}\text{C}$ NMR Spectroscopy of **4oa**

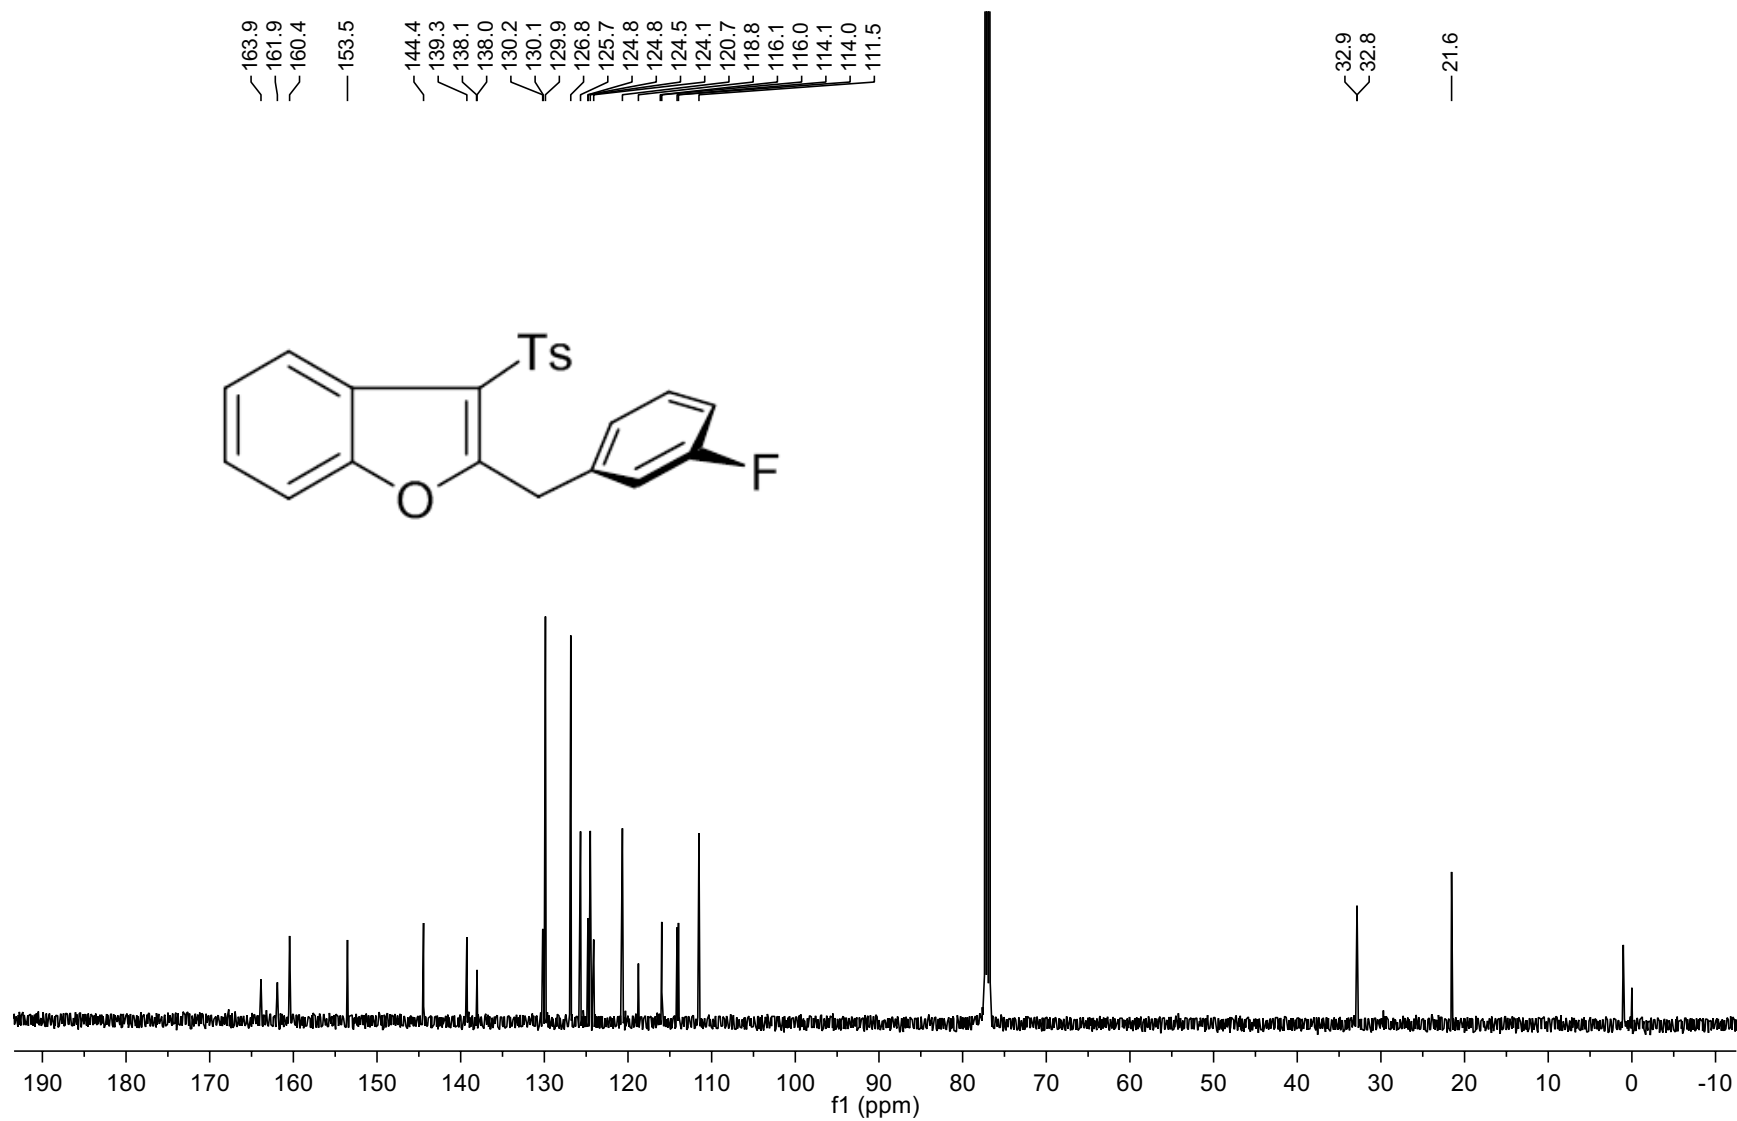

# $^{19}\text{F}$ NMR Spectroscopy of **40a**

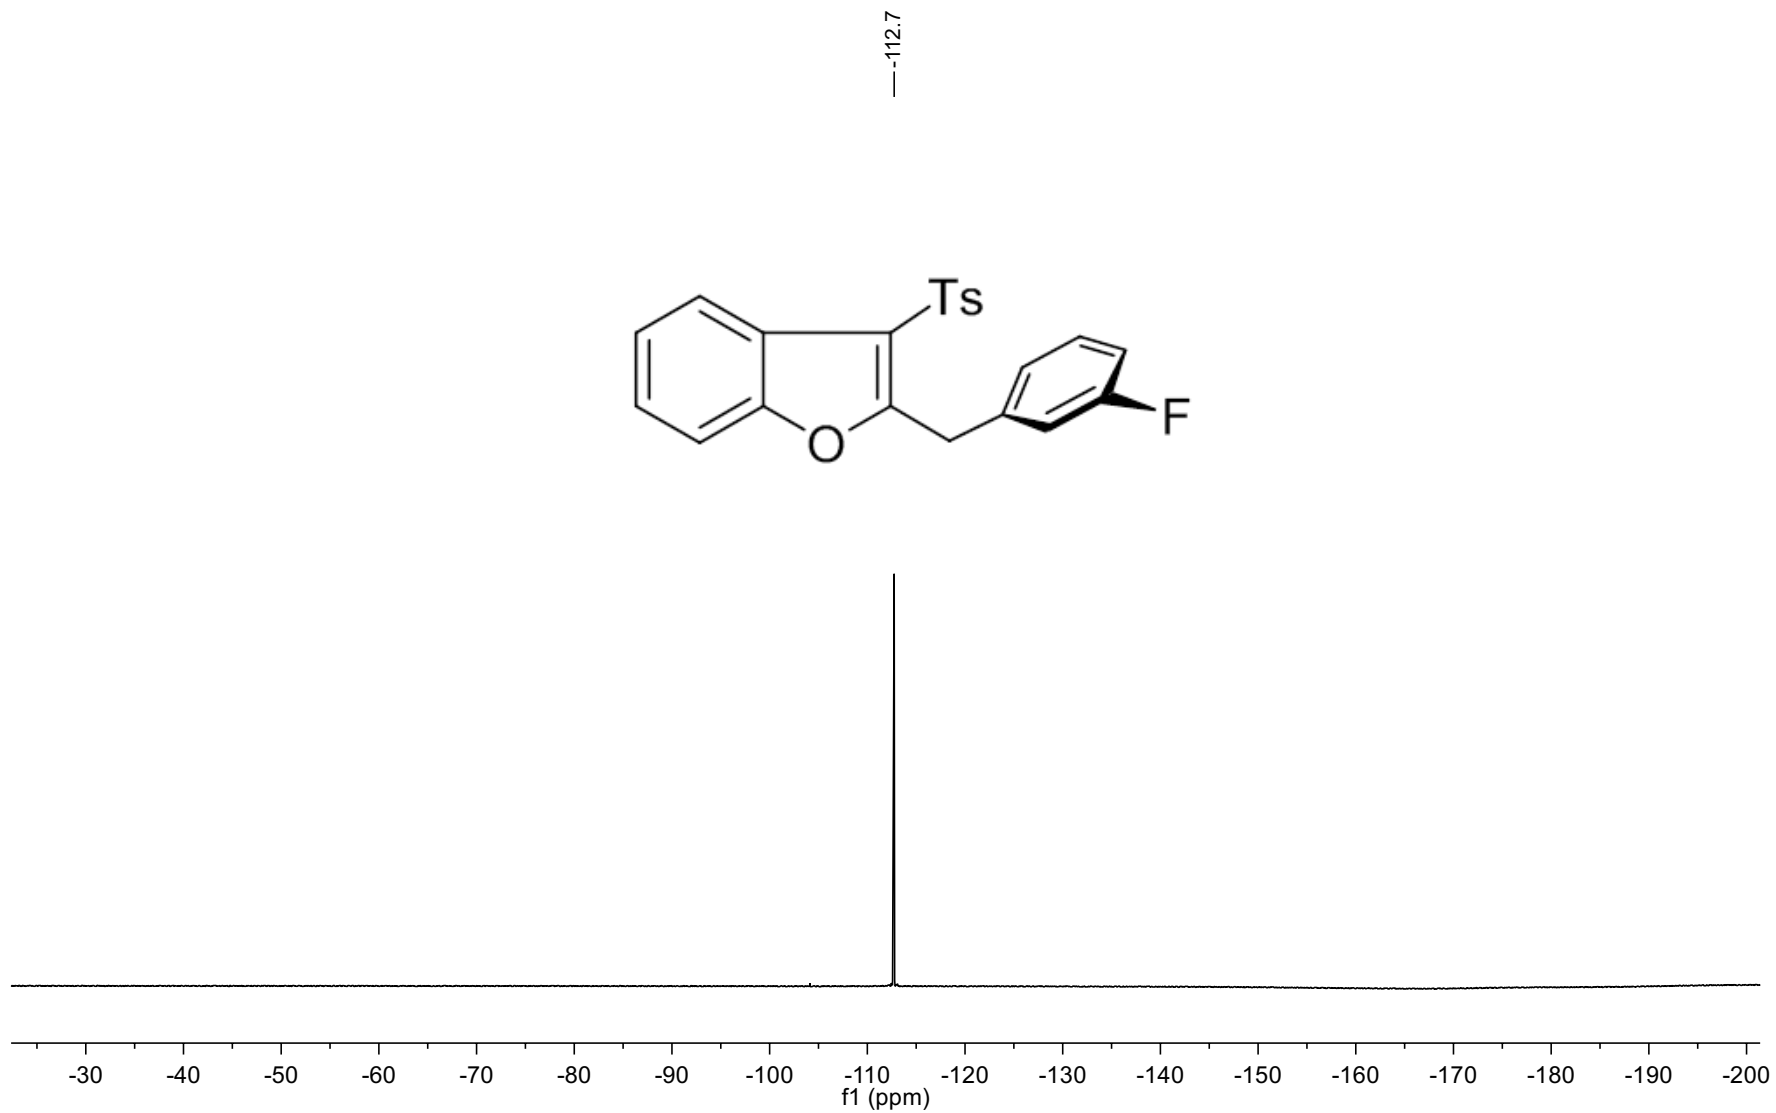

# $^1\text{H}$ NMR Spectroscopy of 4oa'

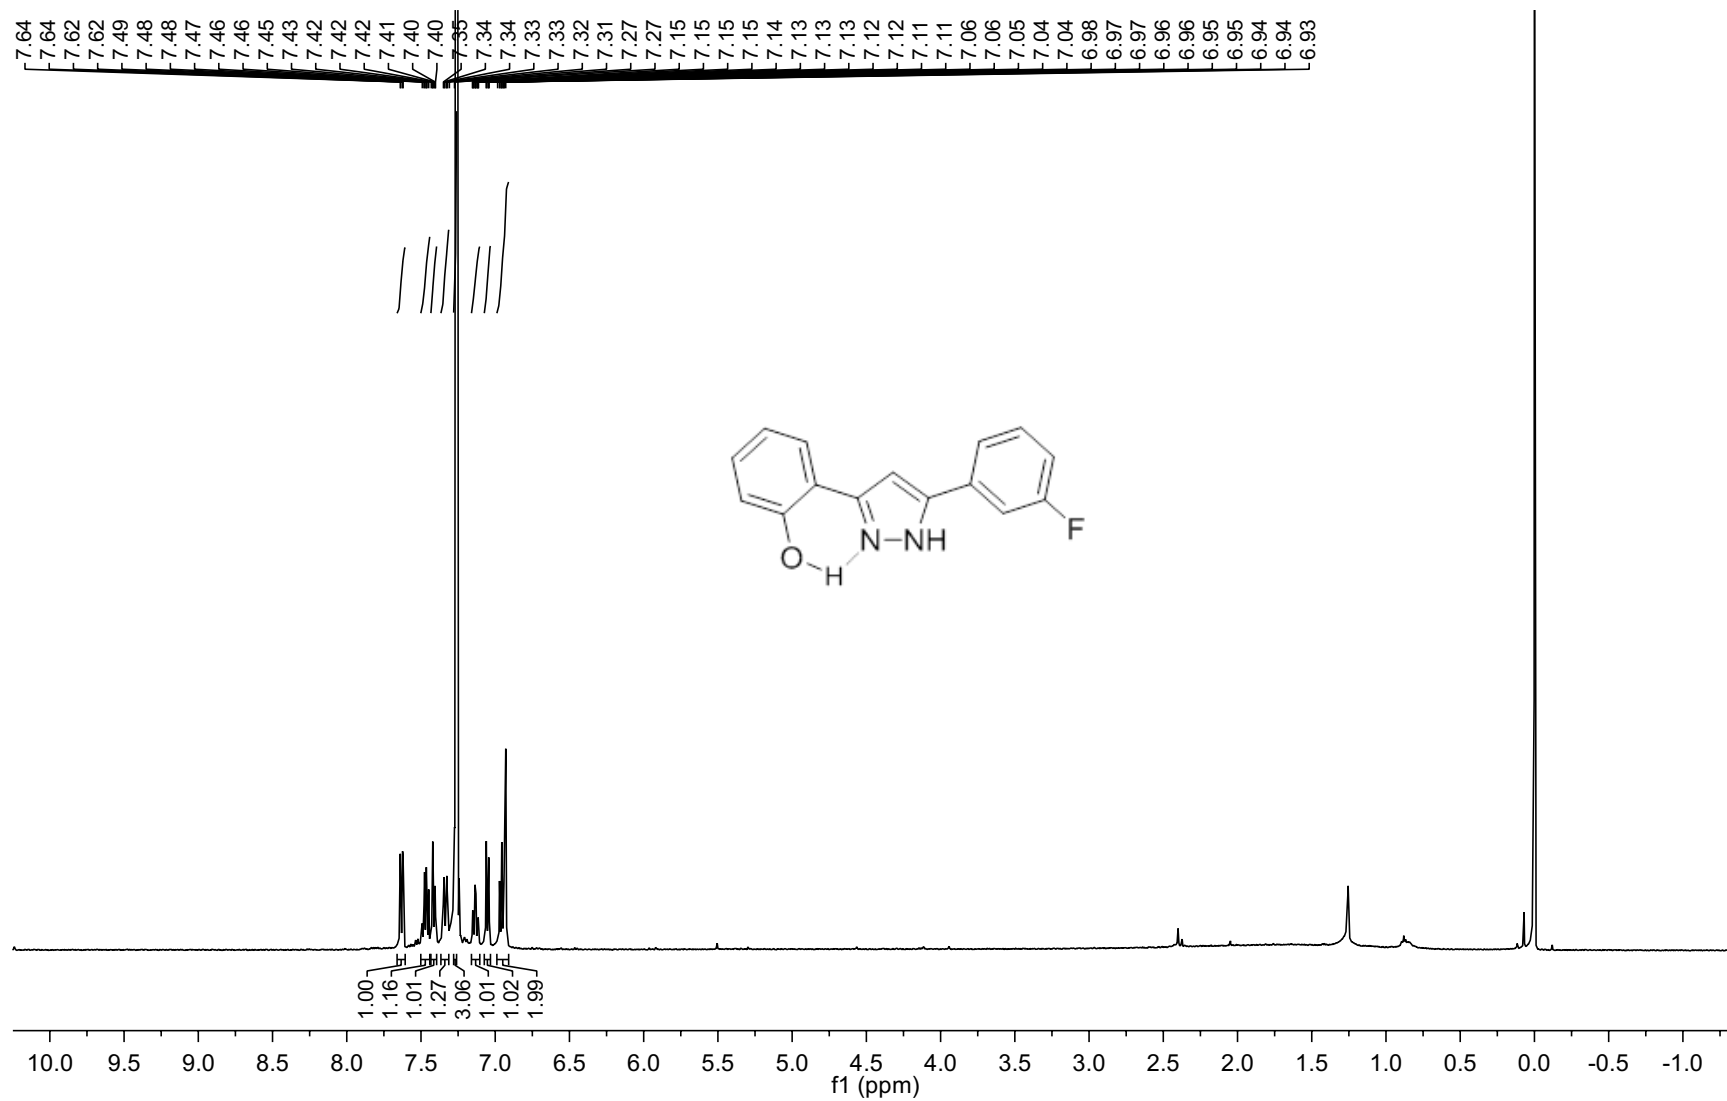

# $^{13}\text{C}$ NMR Spectroscopy of 4a'

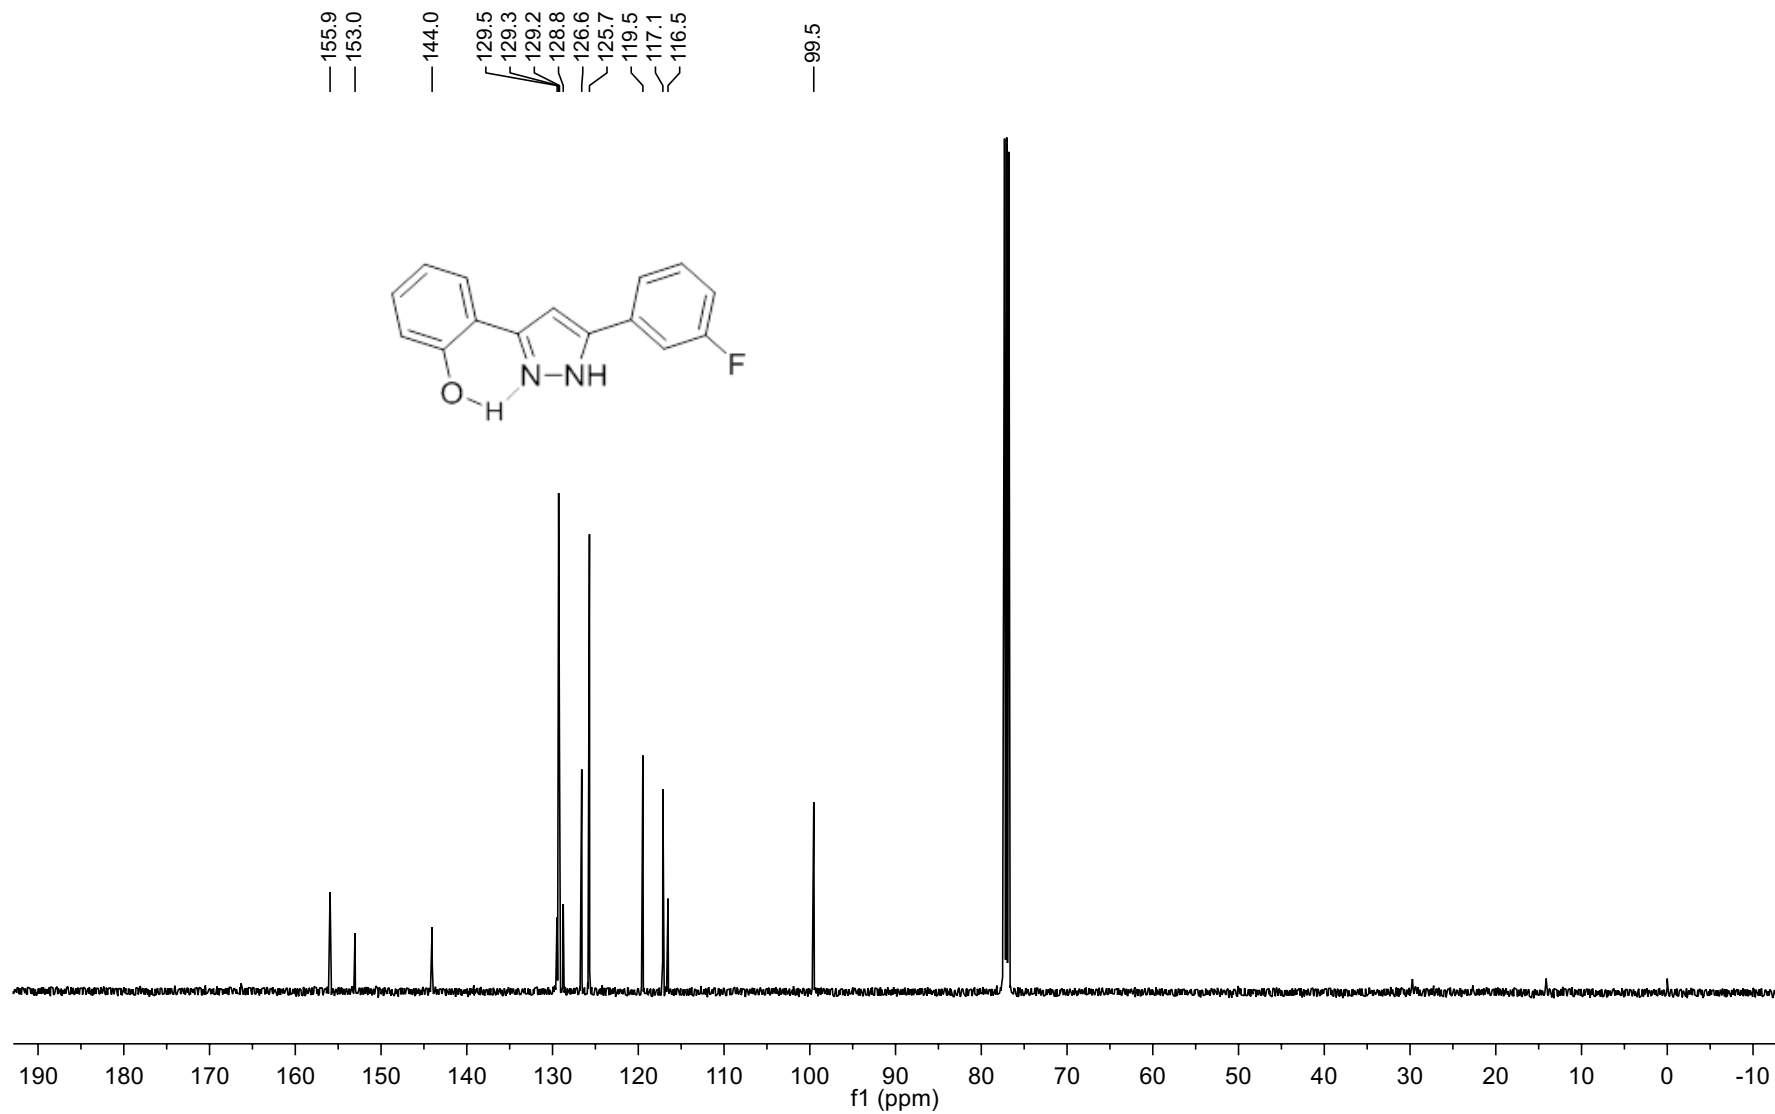

# $^{19}\text{F}$ NMR Spectroscopy of **4oa'**

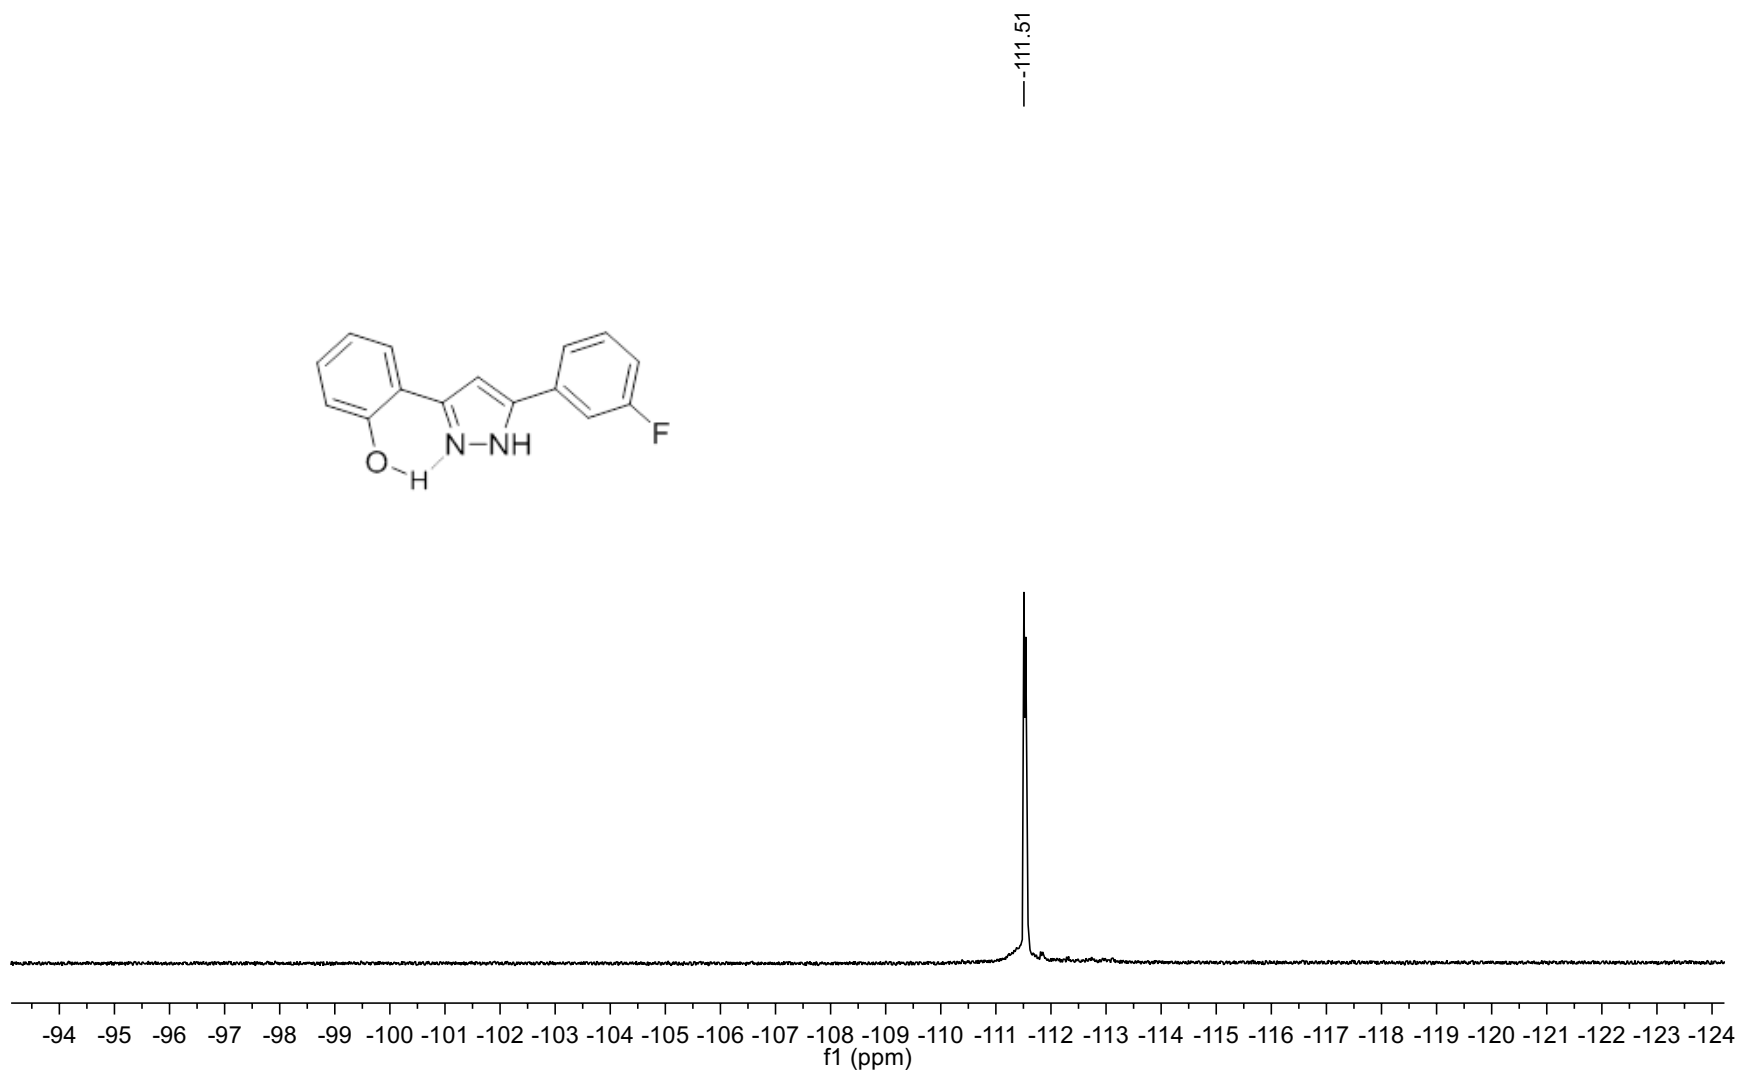



# $^1\text{H}$ NMR Spectroscopy of **4ab**

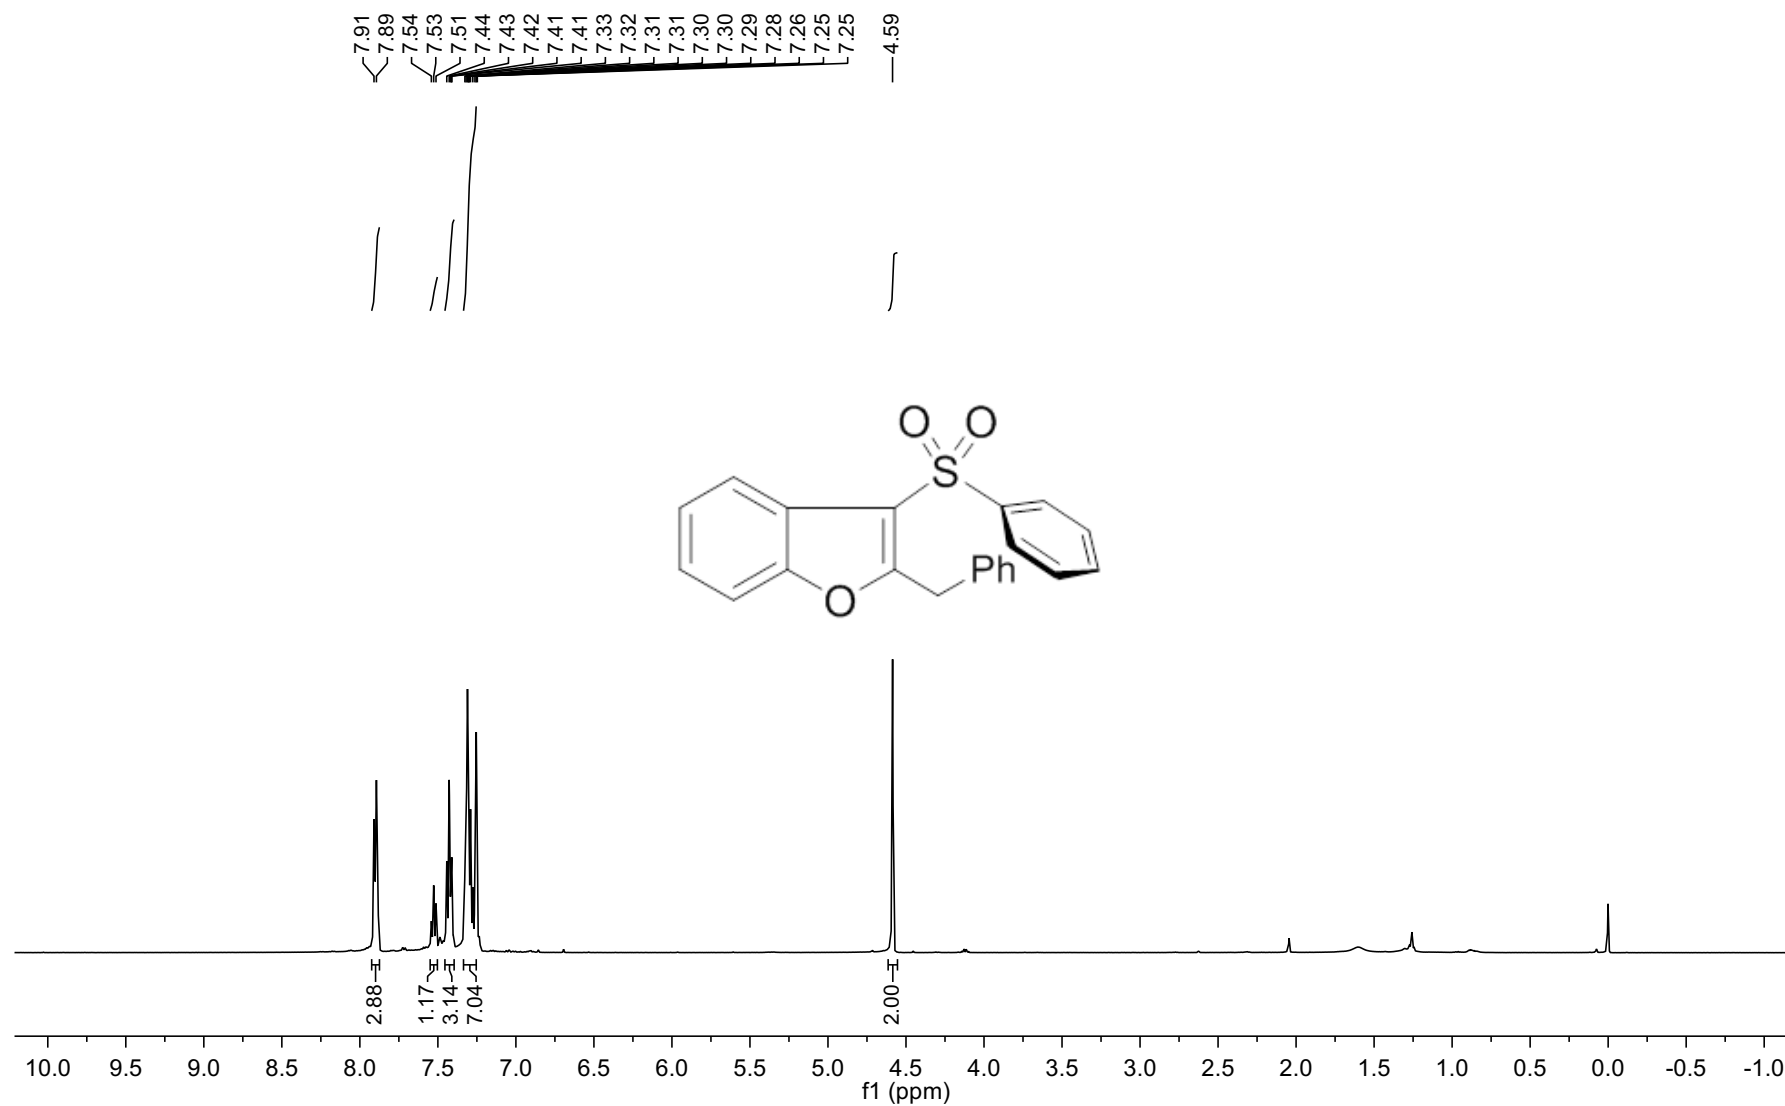

# $^{13}\text{C}$ NMR Spectroscopy of **4ab**

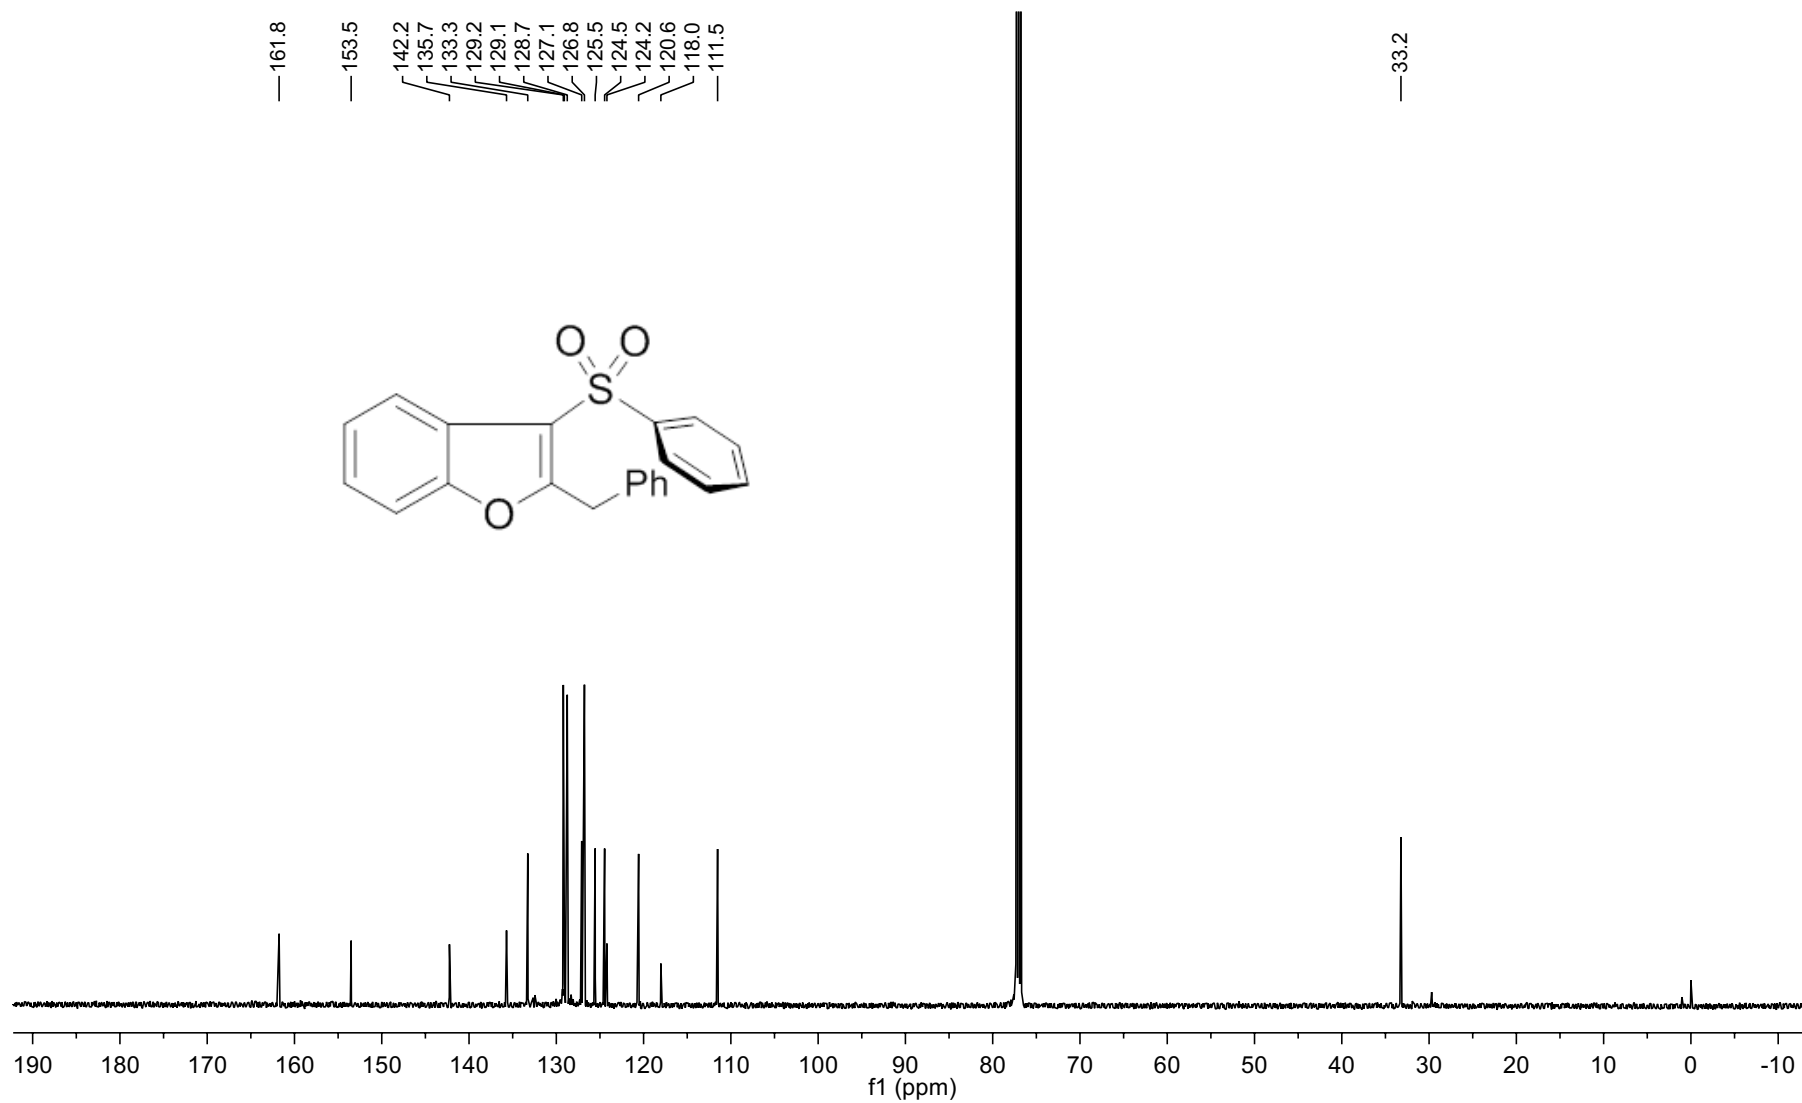

# $^1\text{H}$ NMR Spectroscopy of **4ac**

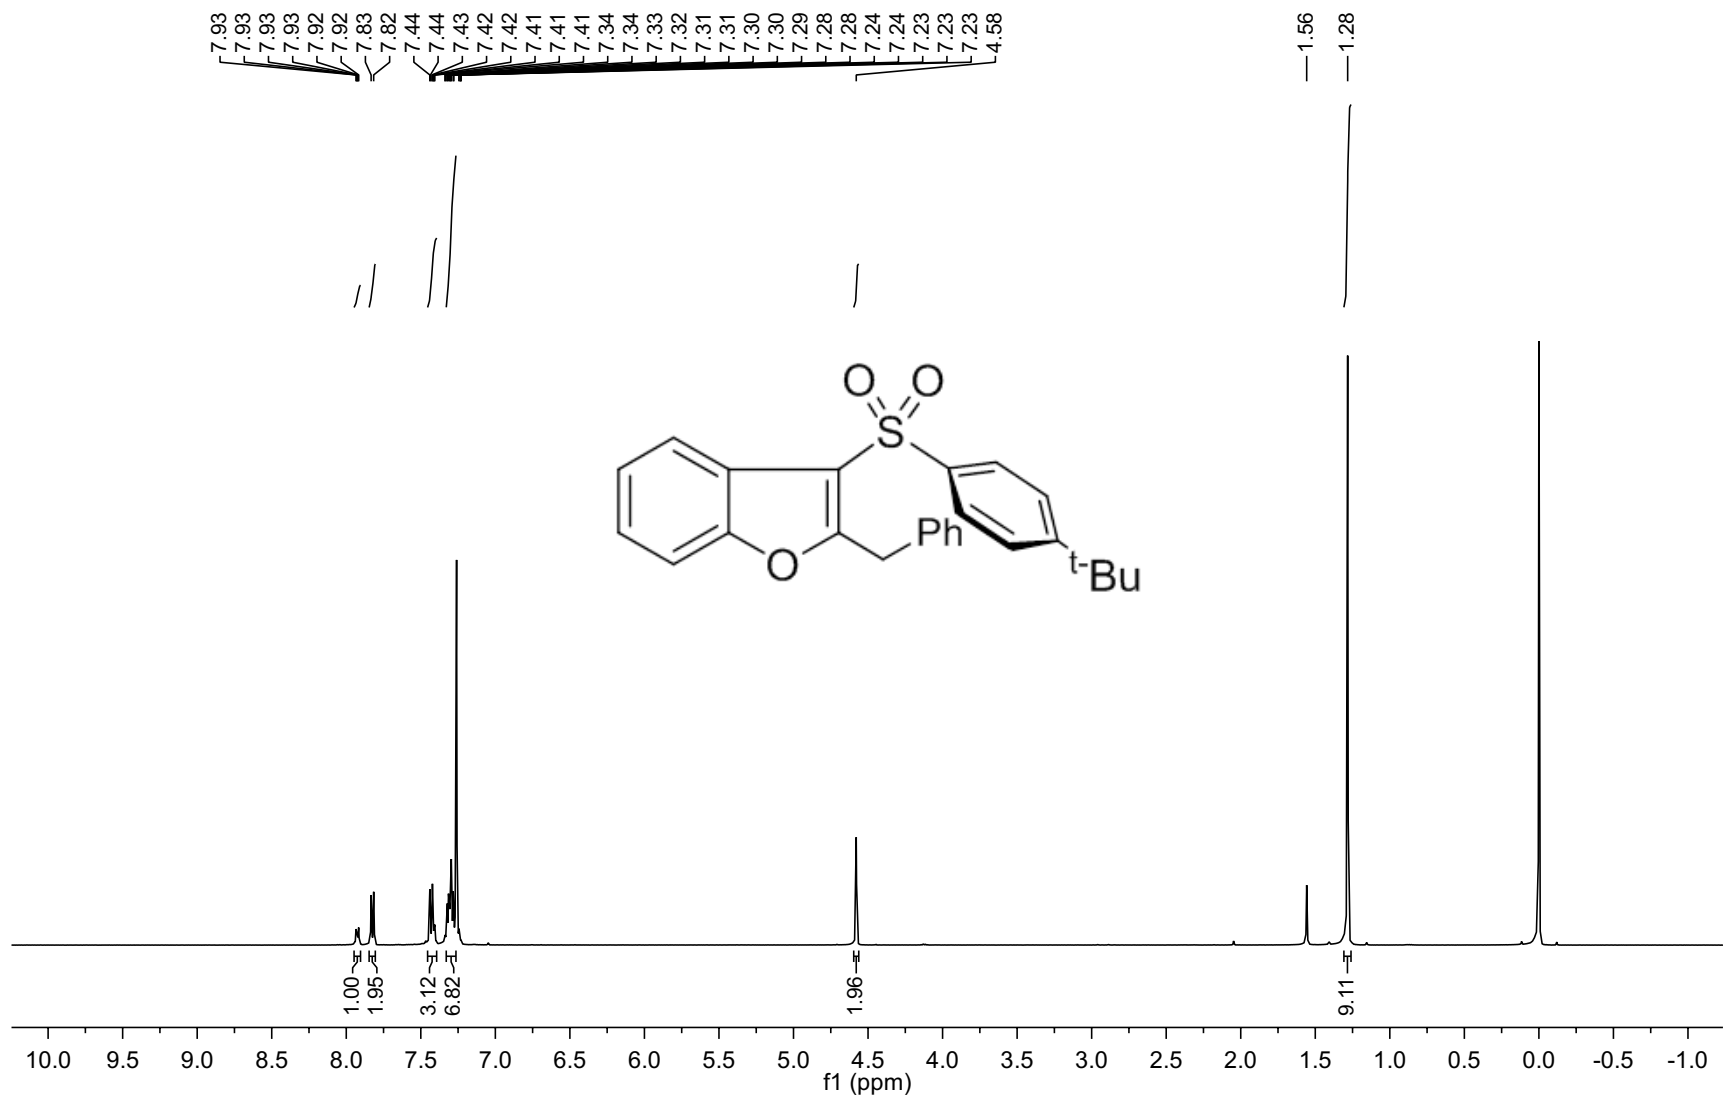

# $^{13}\text{C}$ NMR Spectroscopy of **4ac**

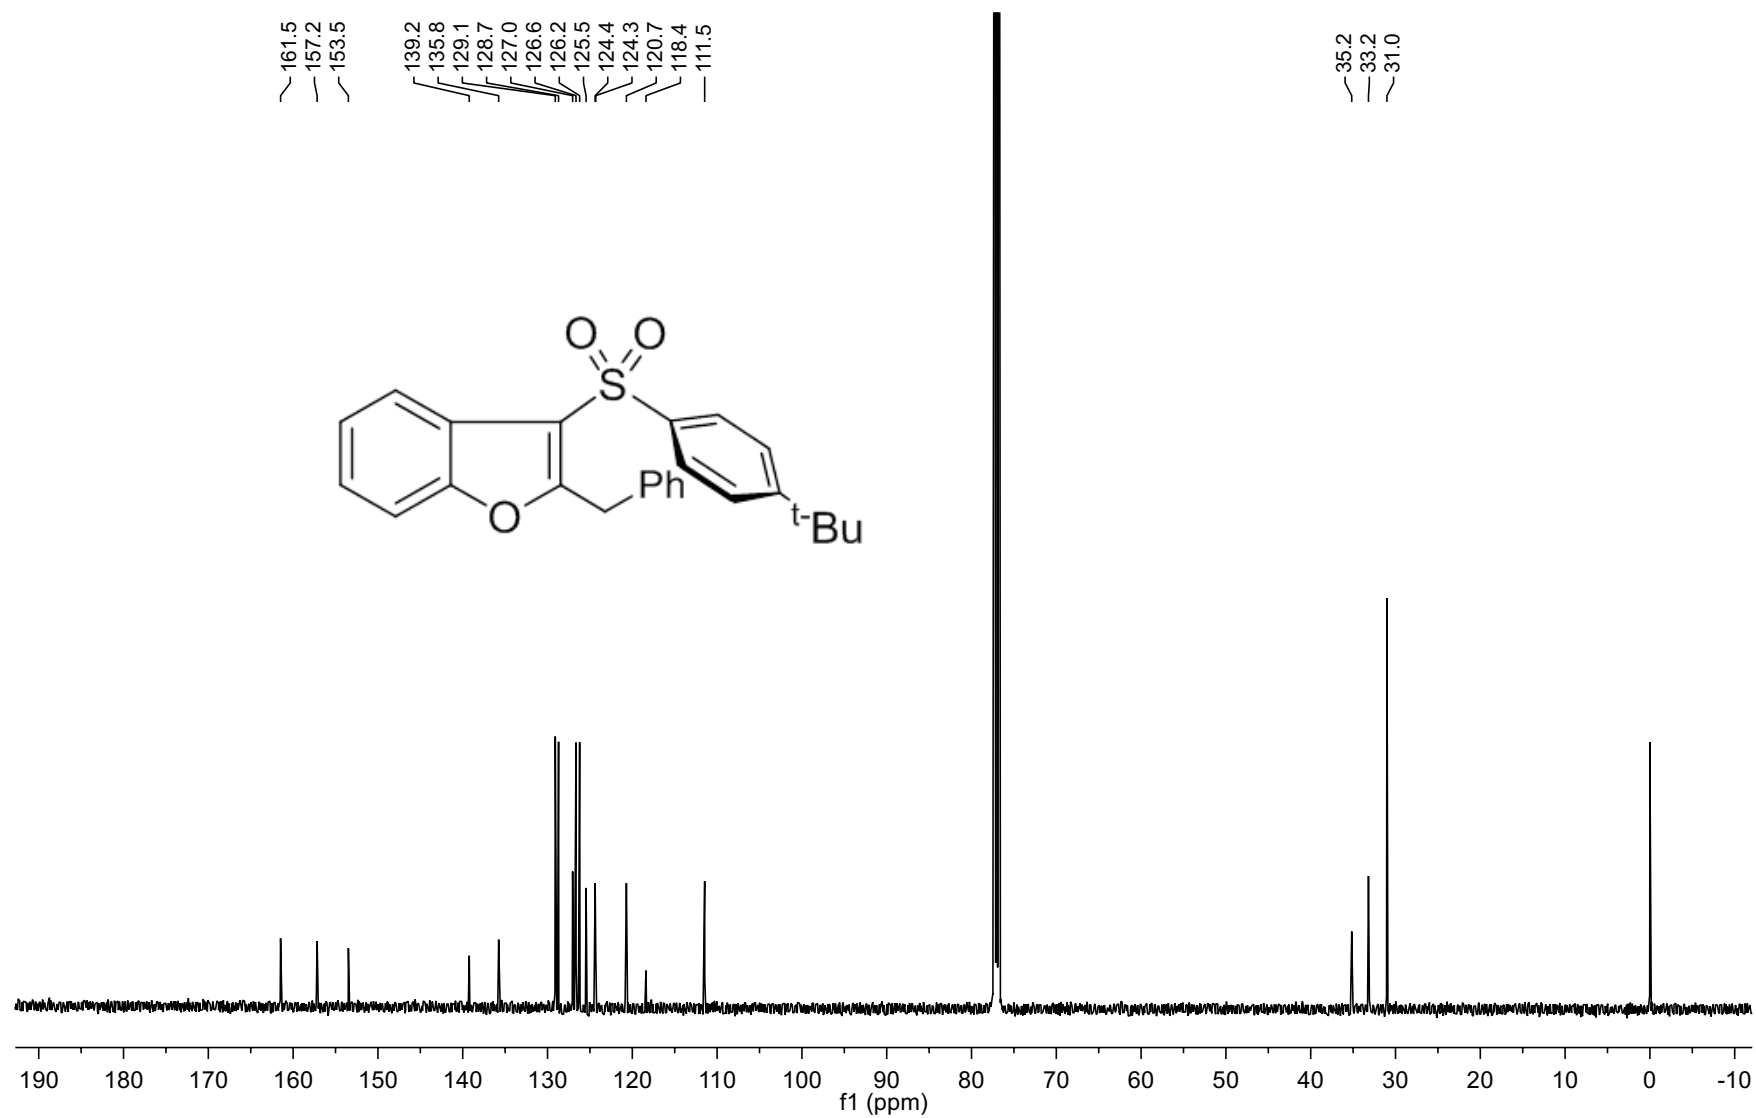

# $^1\text{H}$ NMR Spectroscopy of **4dc**

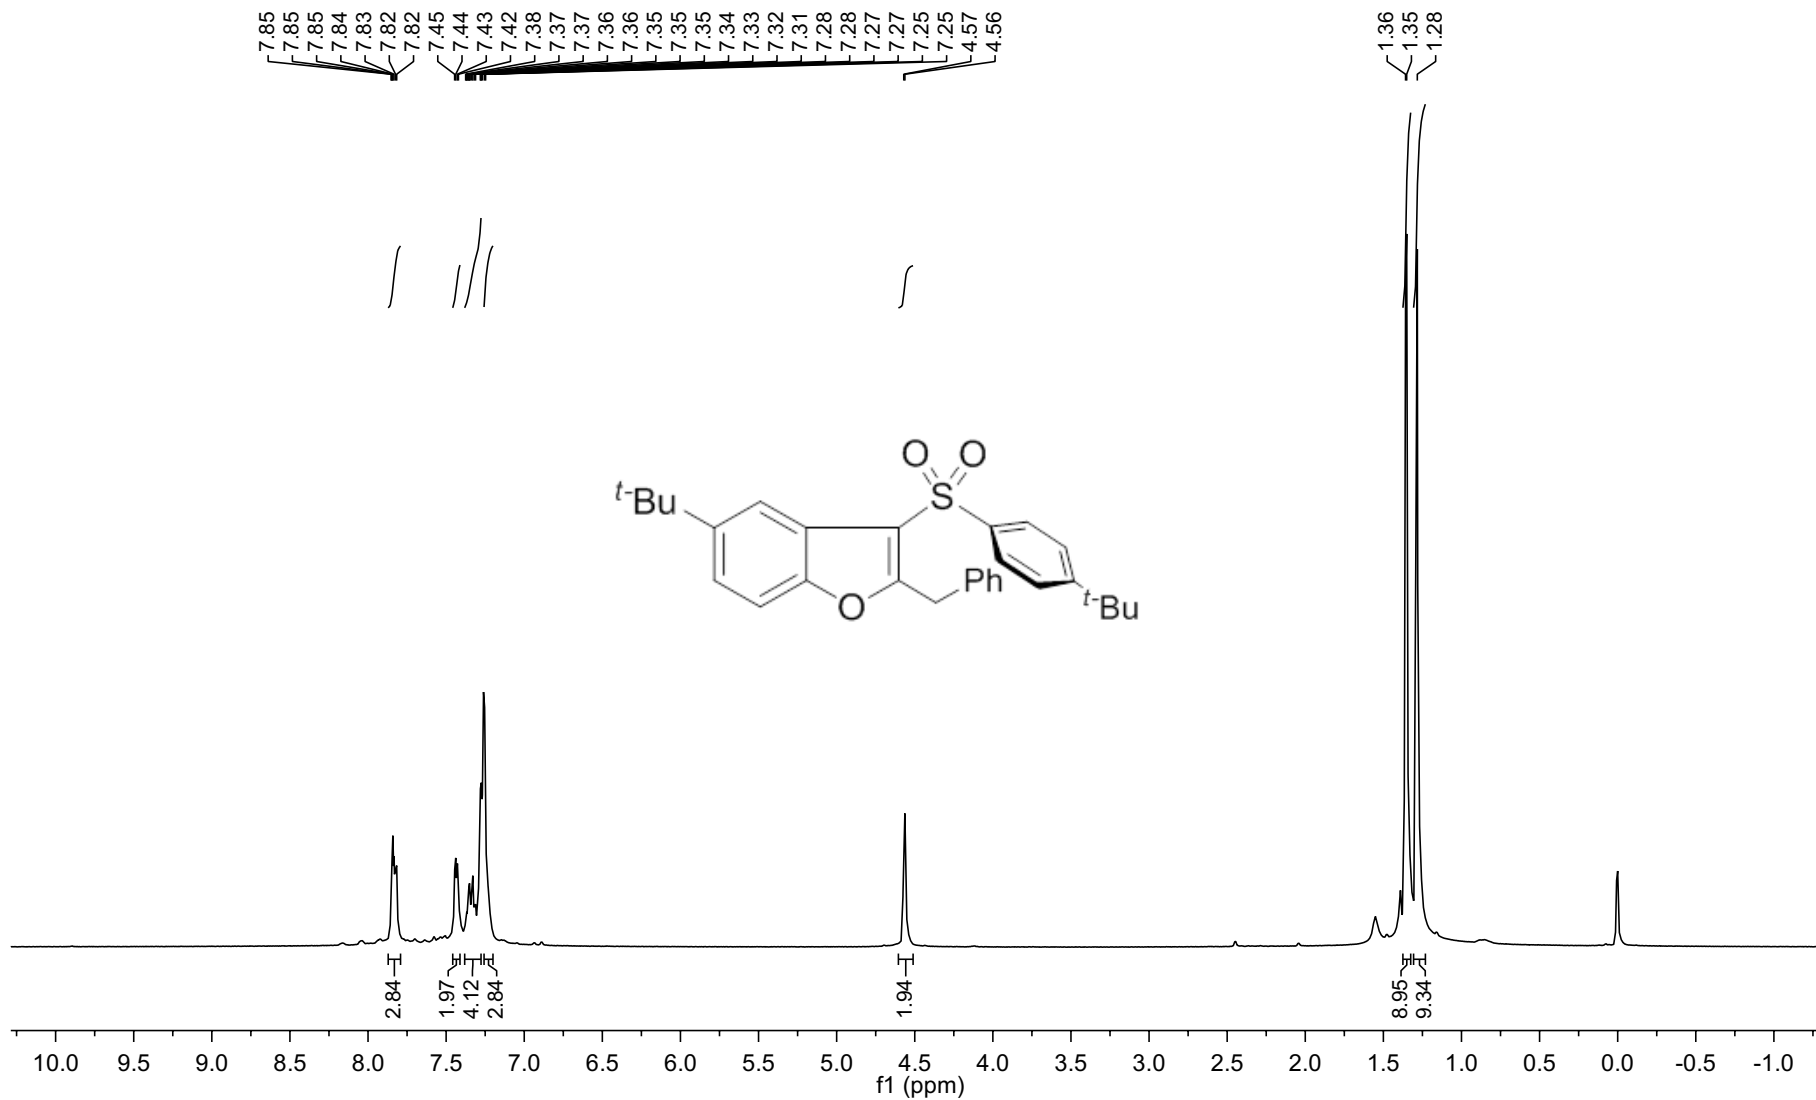

# $^{13}\text{C}$ NMR Spectroscopy of **4dc**

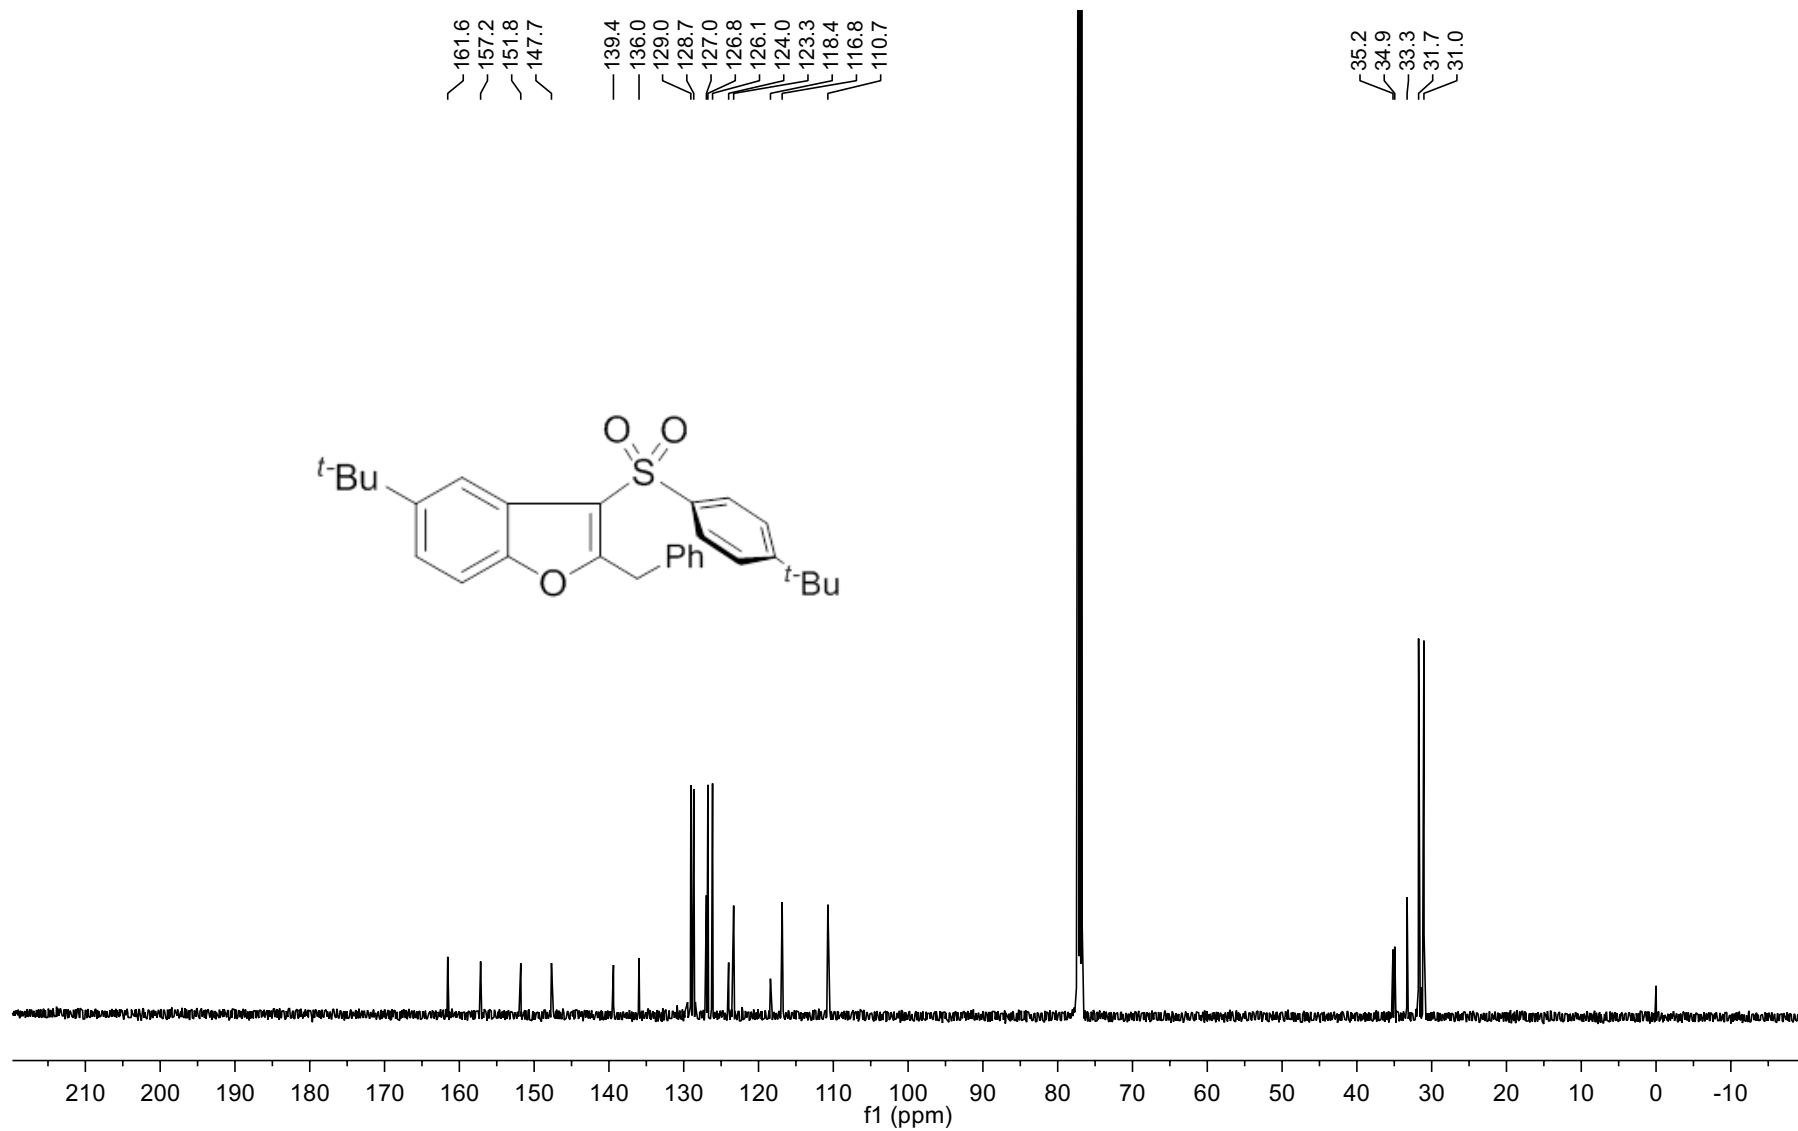

# $^1\text{H}$ NMR Spectroscopy of 4ad

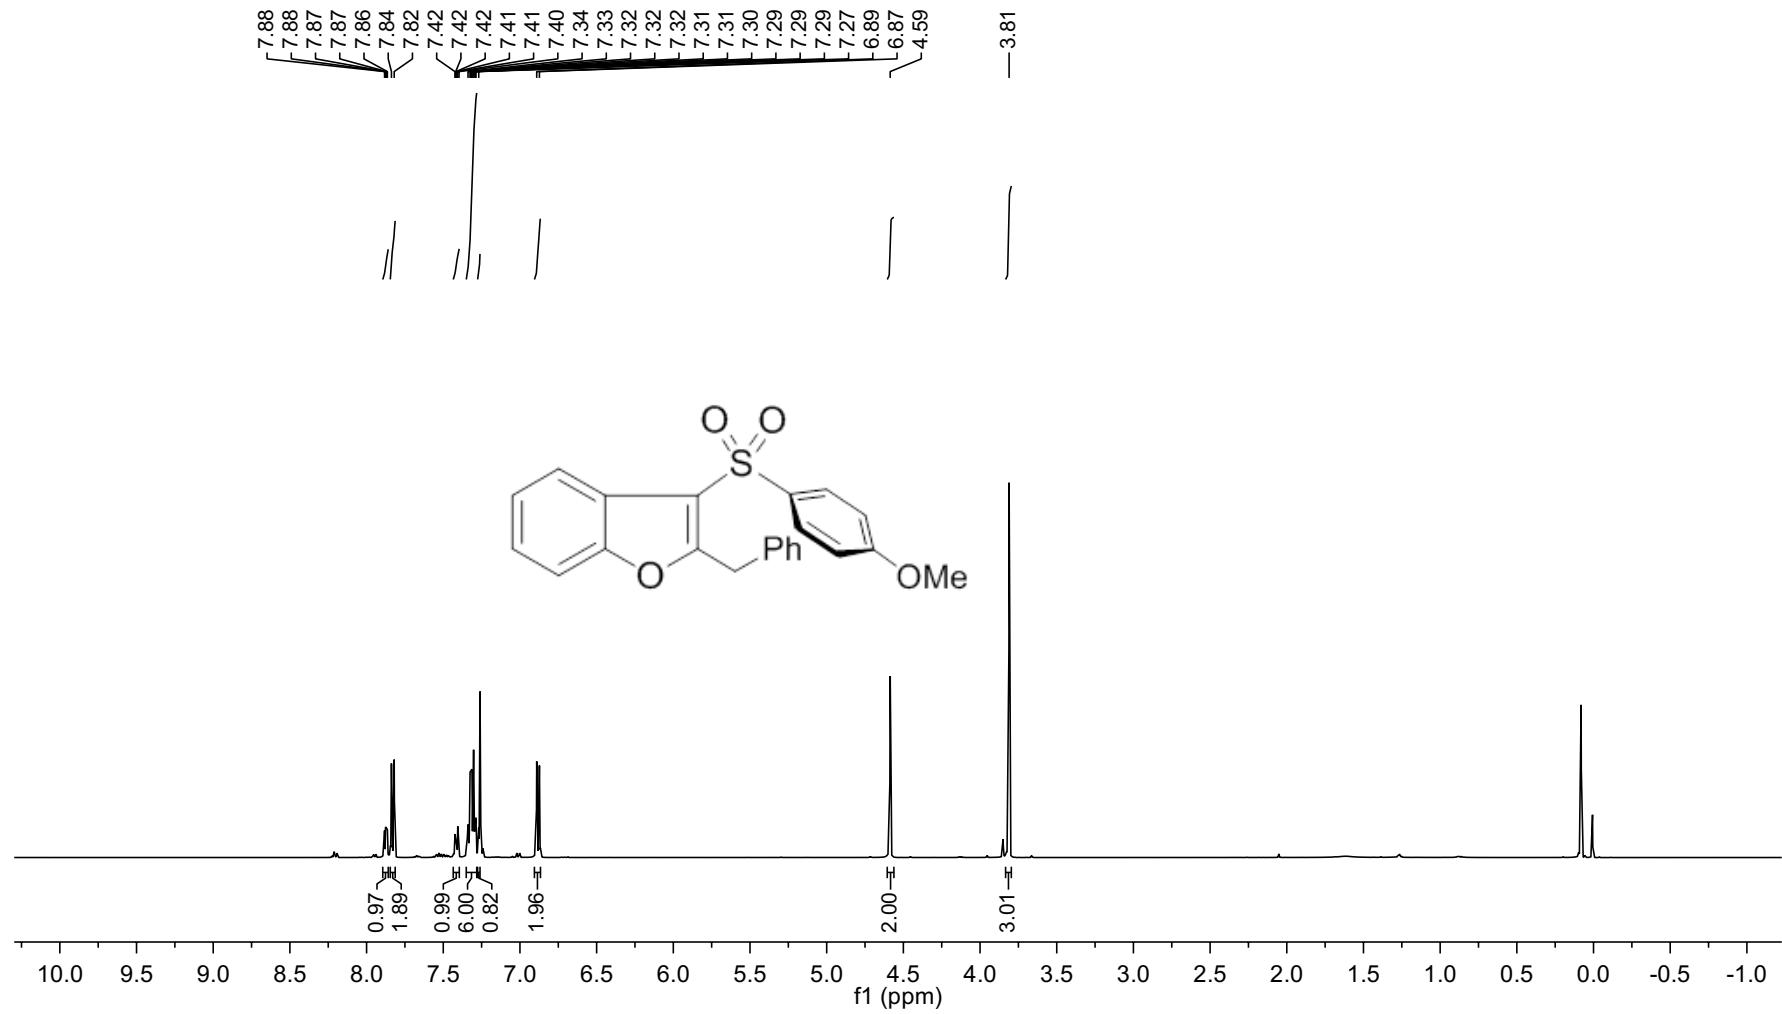

# $^{13}\text{C}$ NMR Spectroscopy of **4ad**

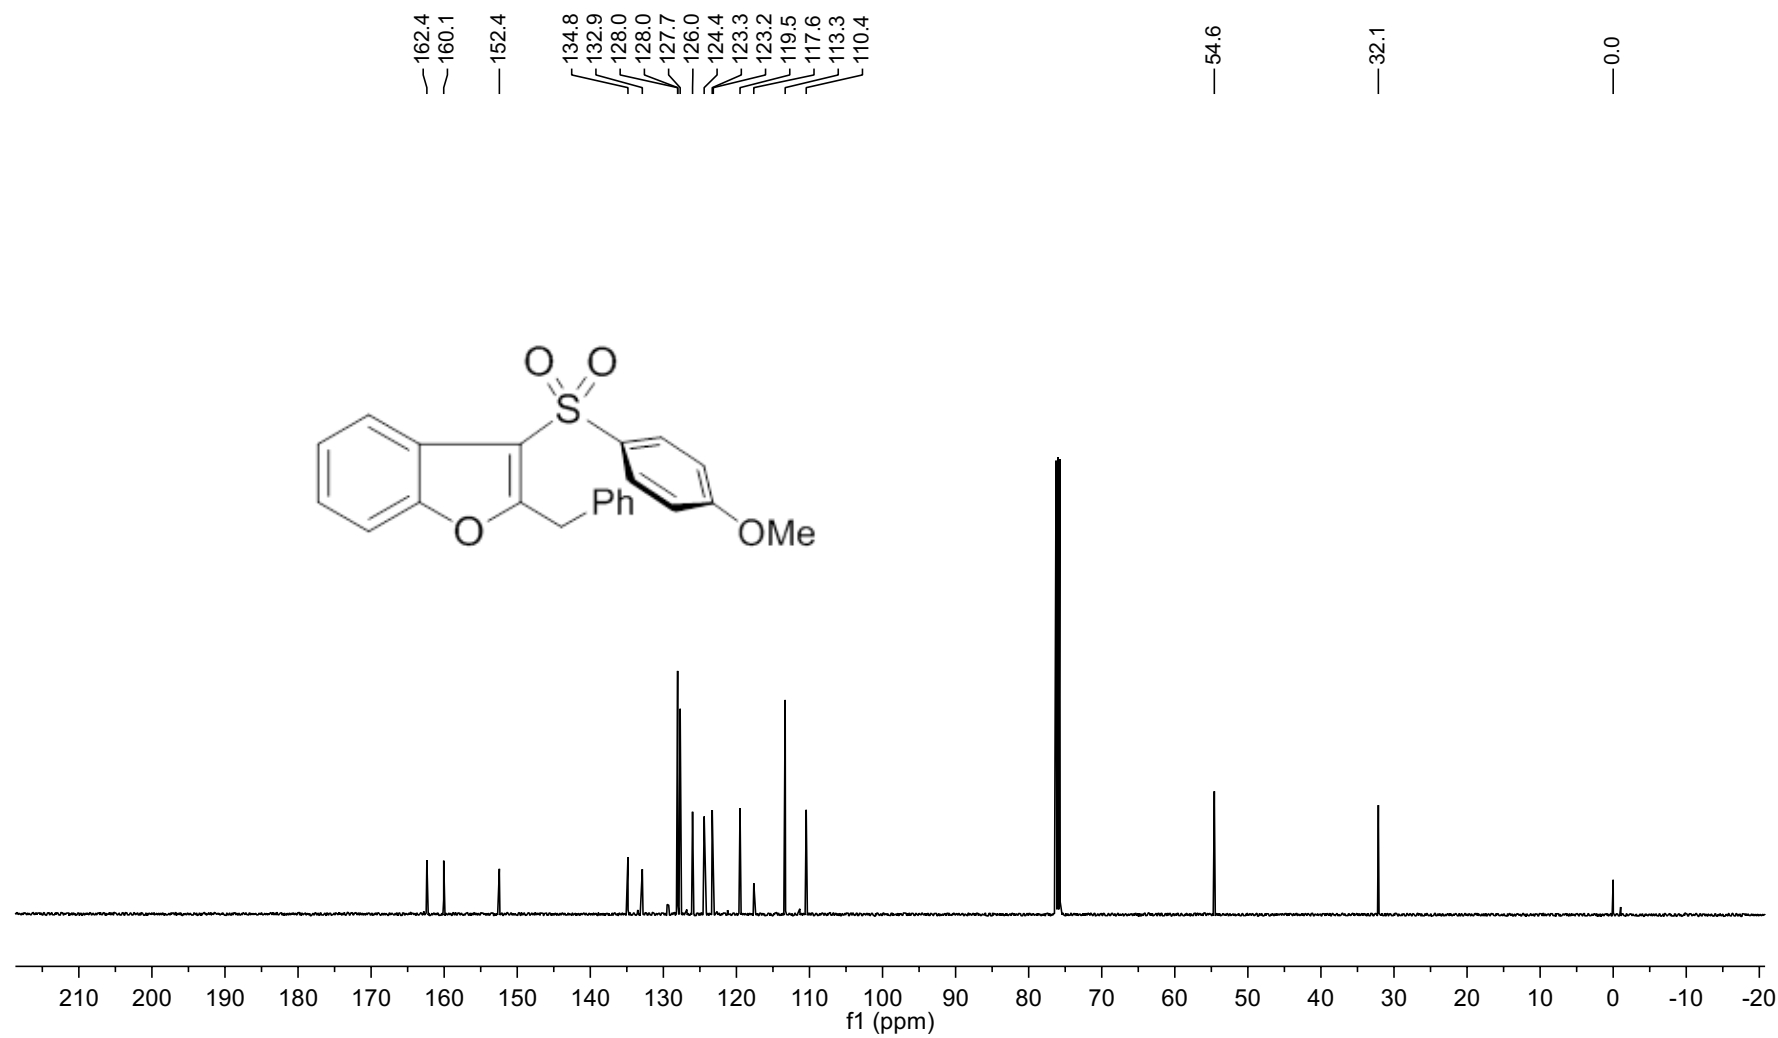



# $^1\text{H}$ NMR Spectroscopy of **4cd**

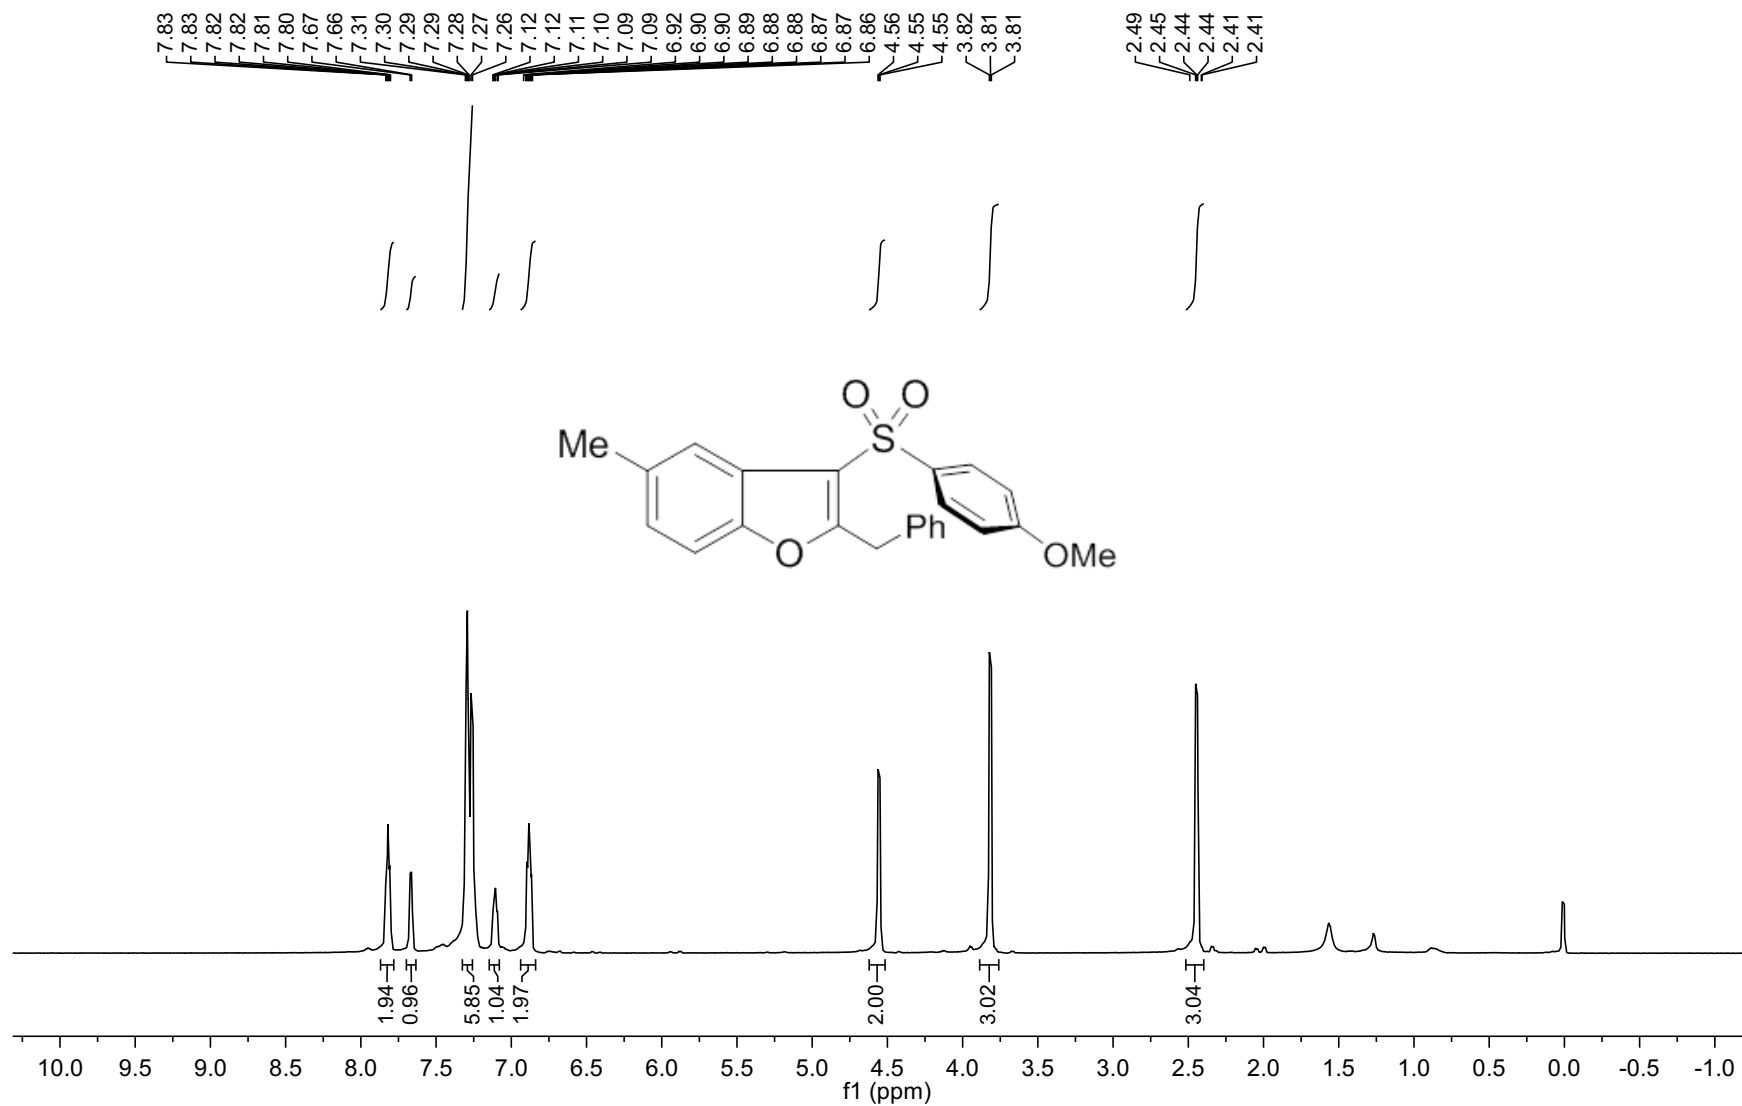

# $^{13}\text{C}$ NMR Spectroscopy of **4cd**

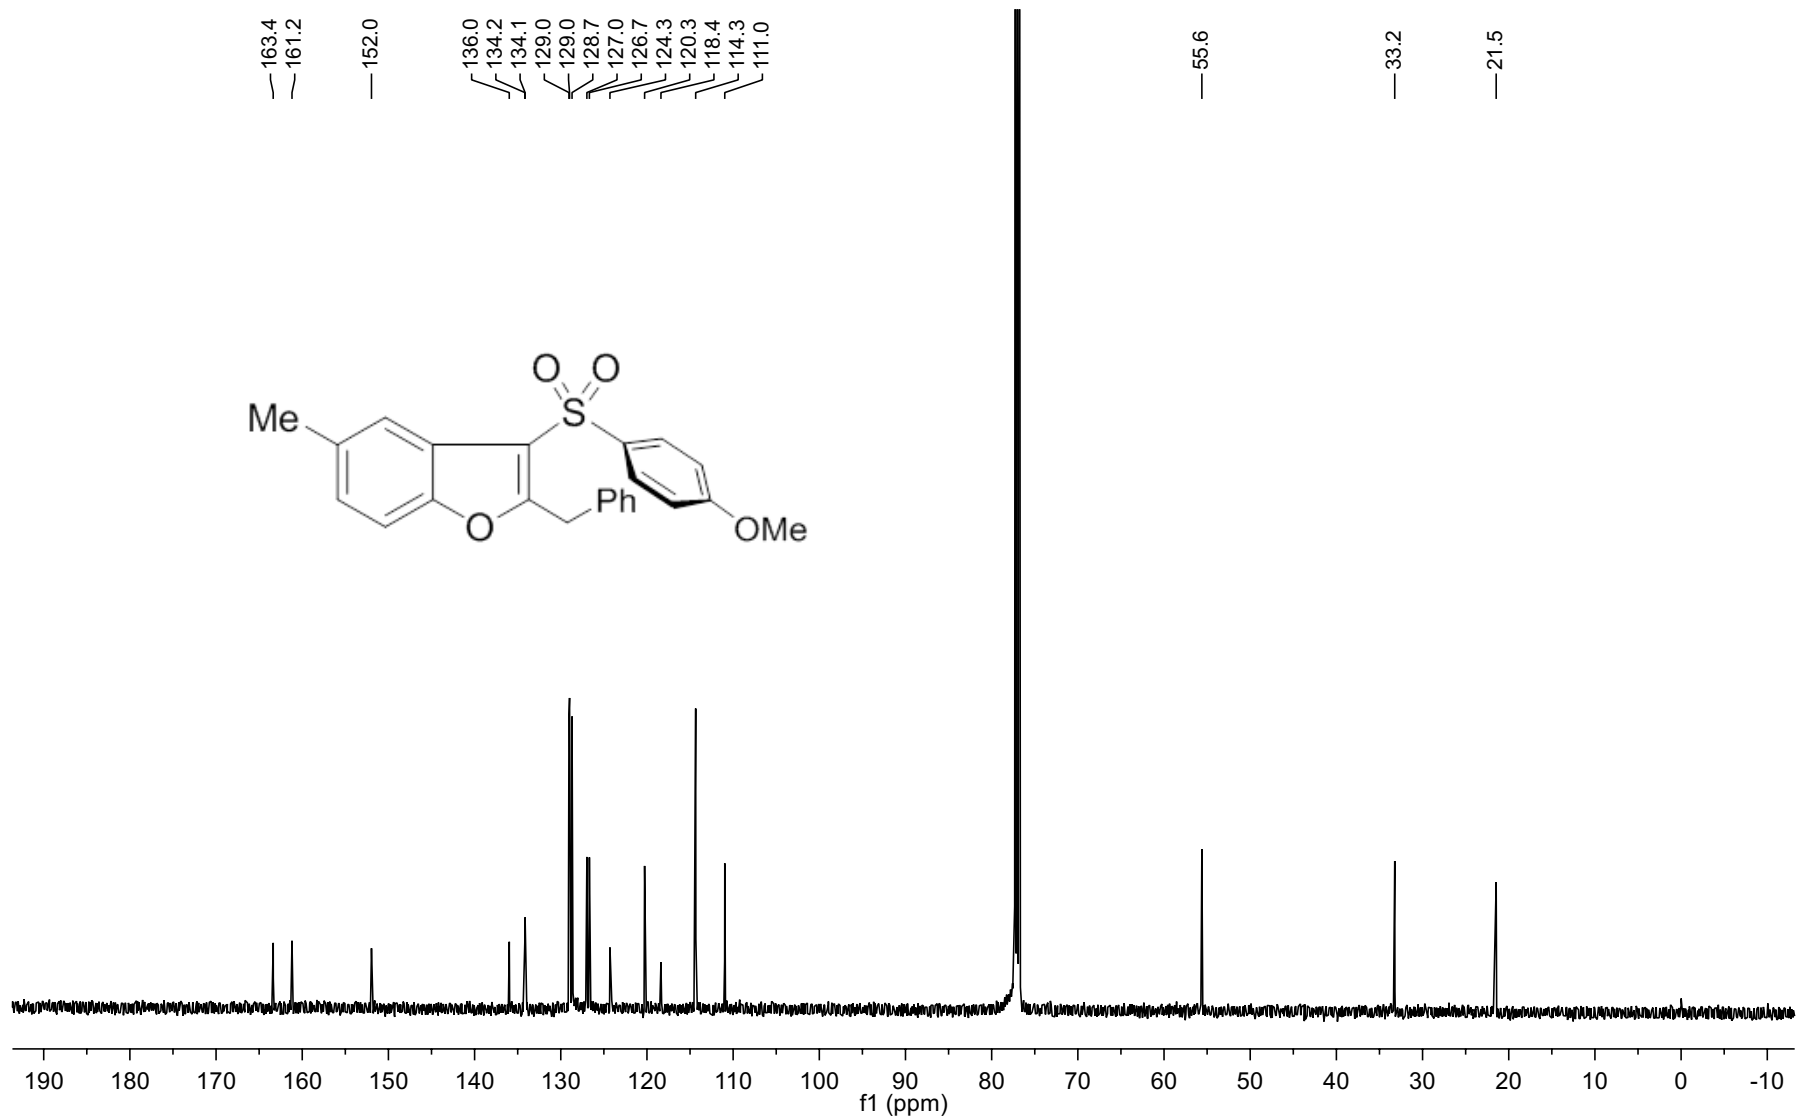

# $^1\text{H}$ NMR Spectroscopy of 4ae

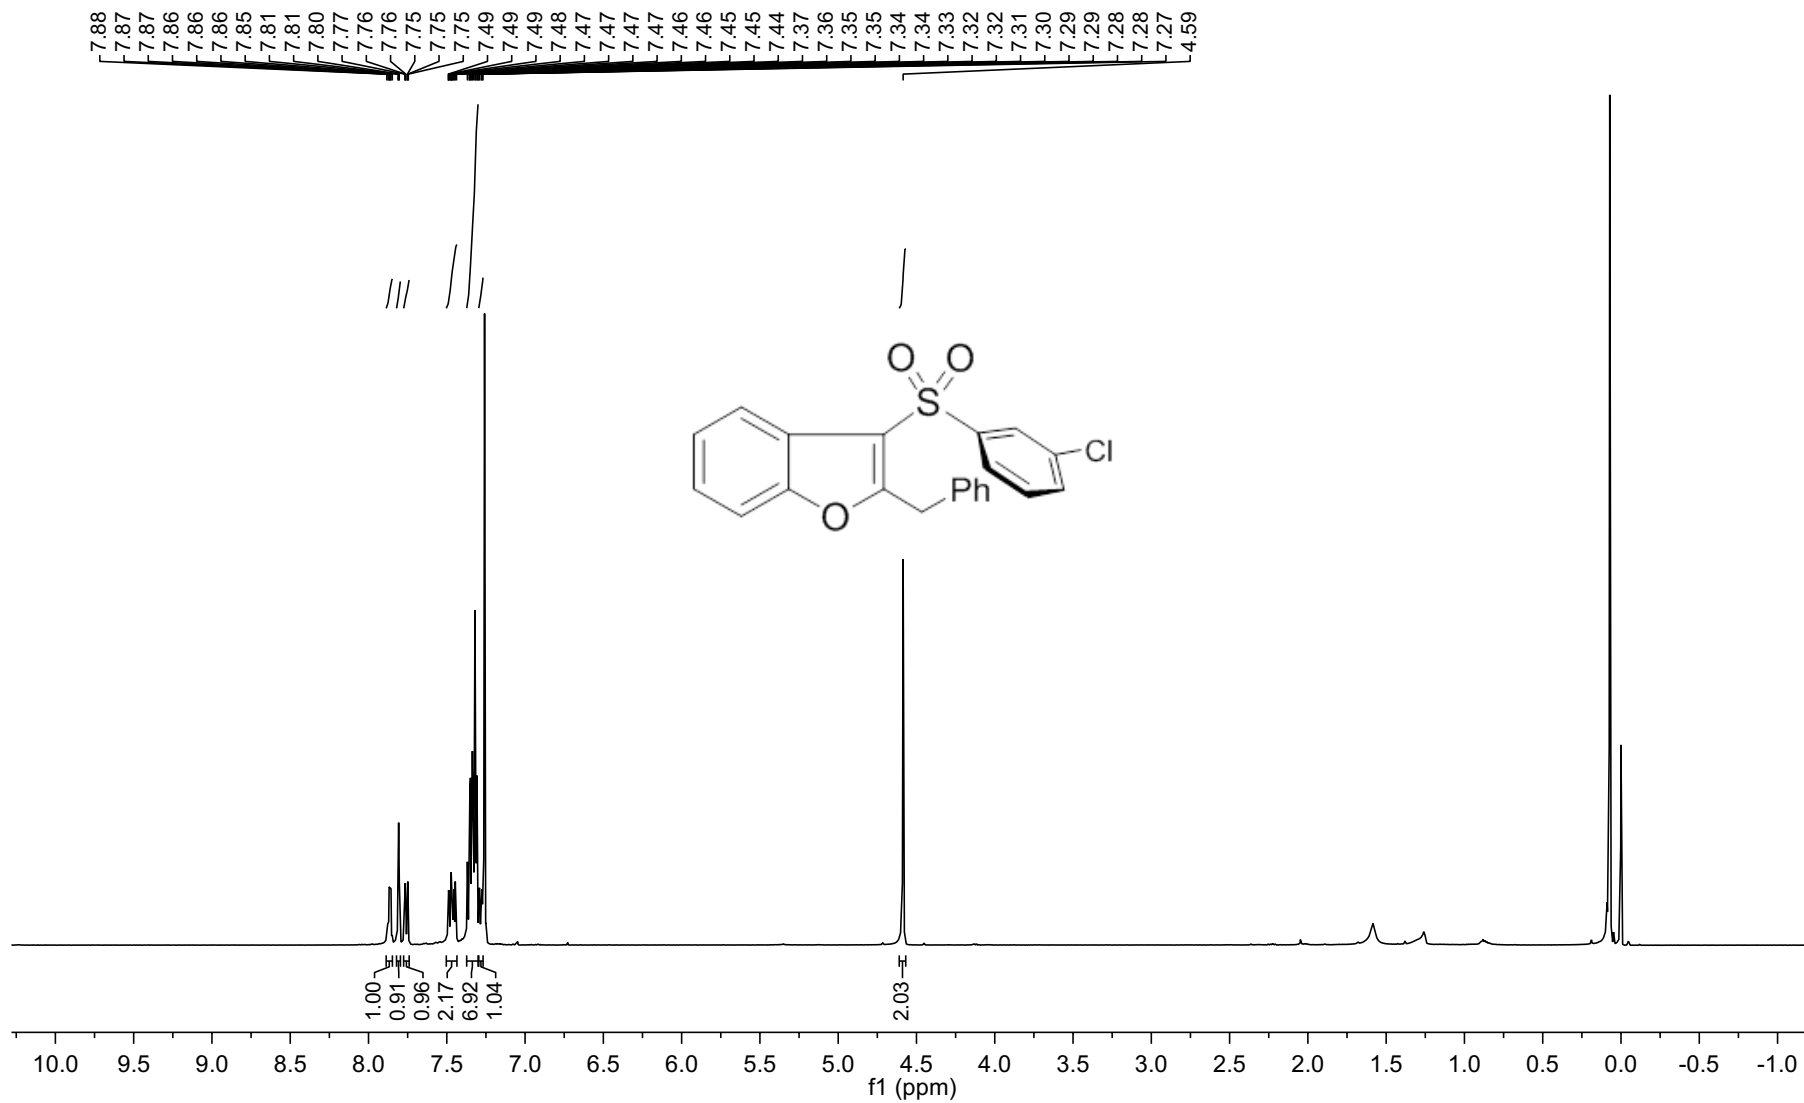

# $^{13}\text{C}$ NMR Spectroscopy of **4ae**

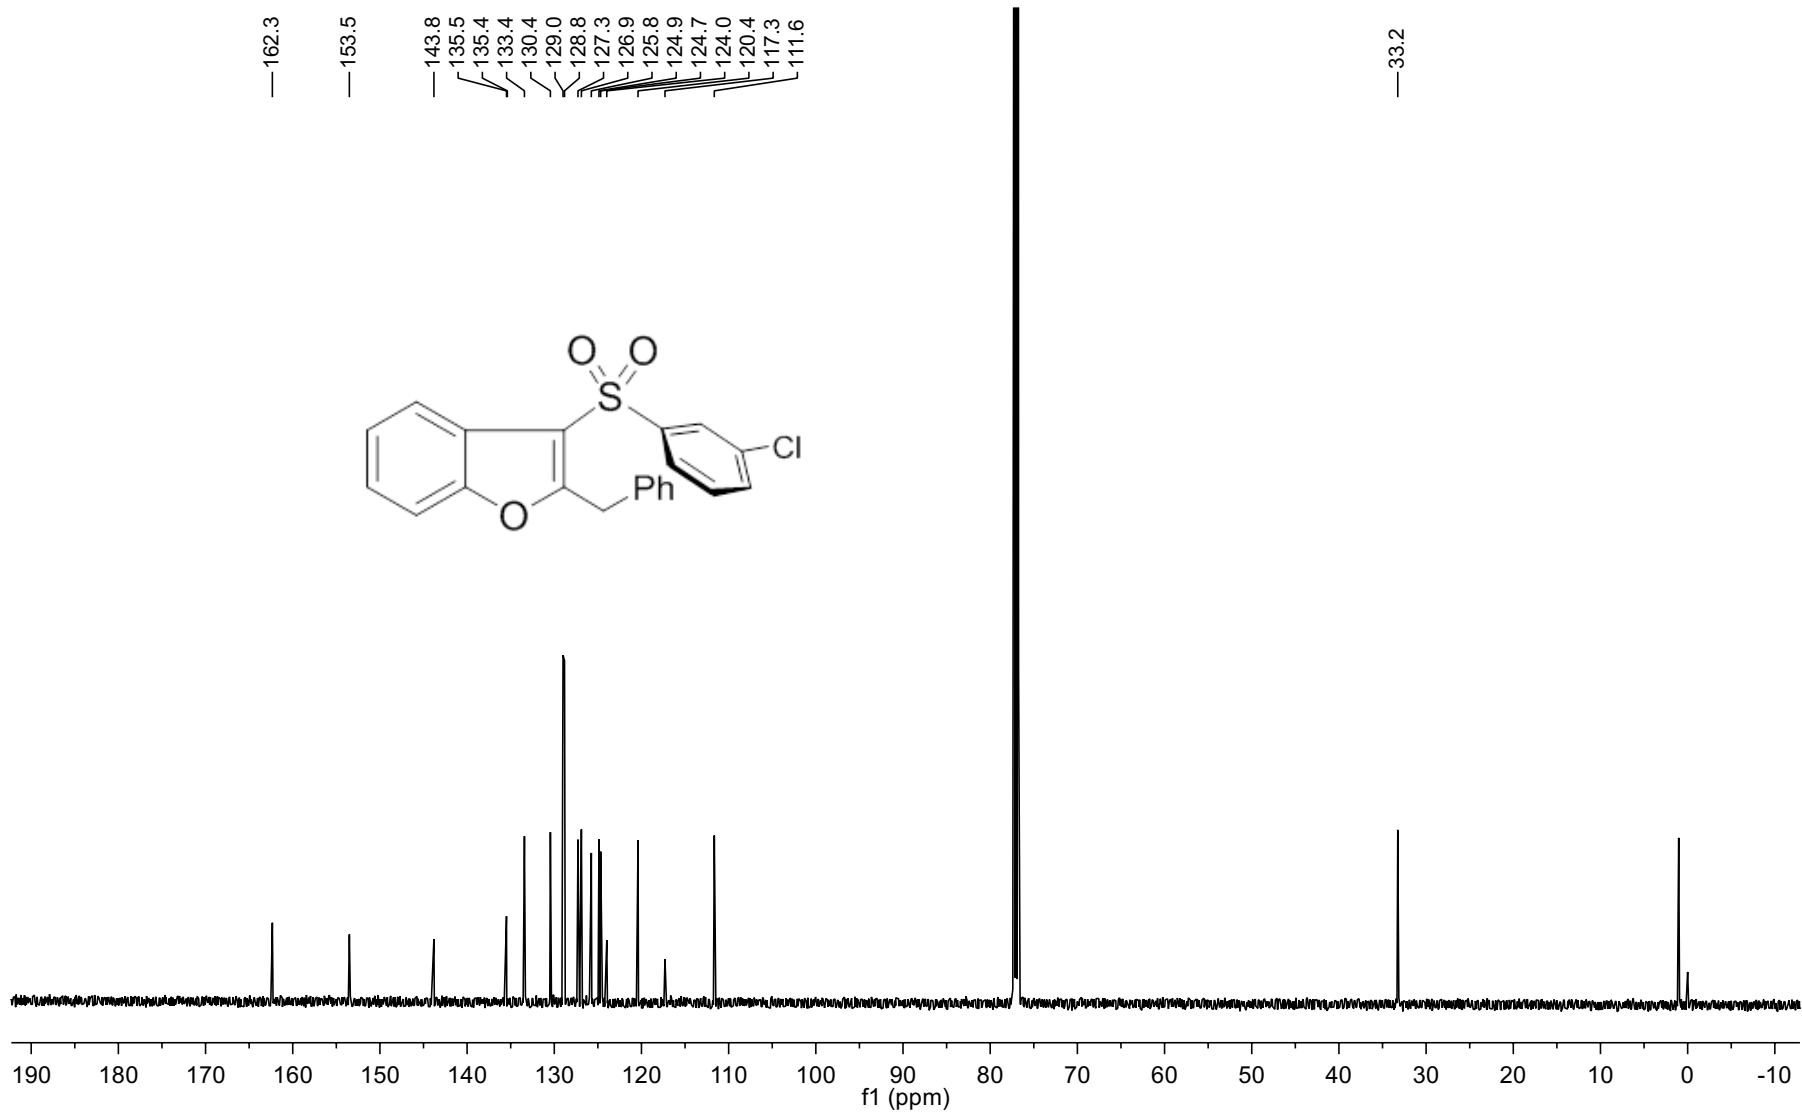

# $^1\text{H}$ NMR Spectroscopy of **4af**

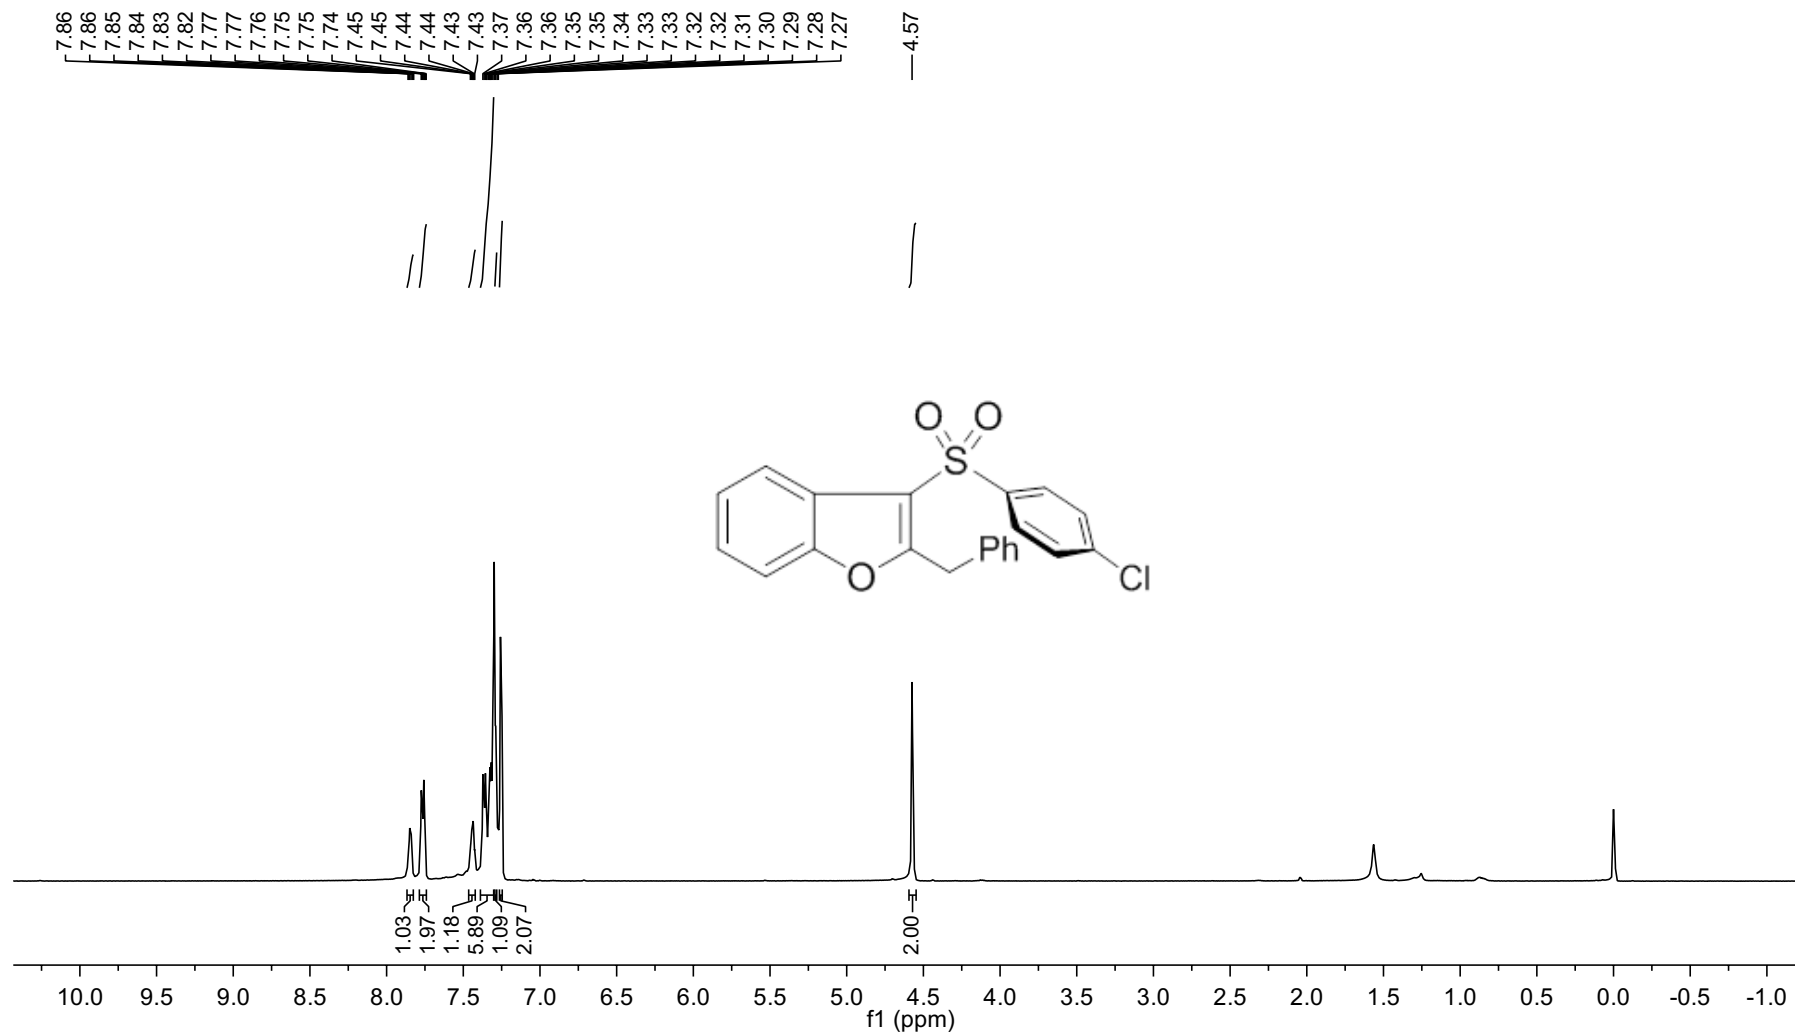

# $^{13}\text{C}$ NMR Spectroscopy of **4af**

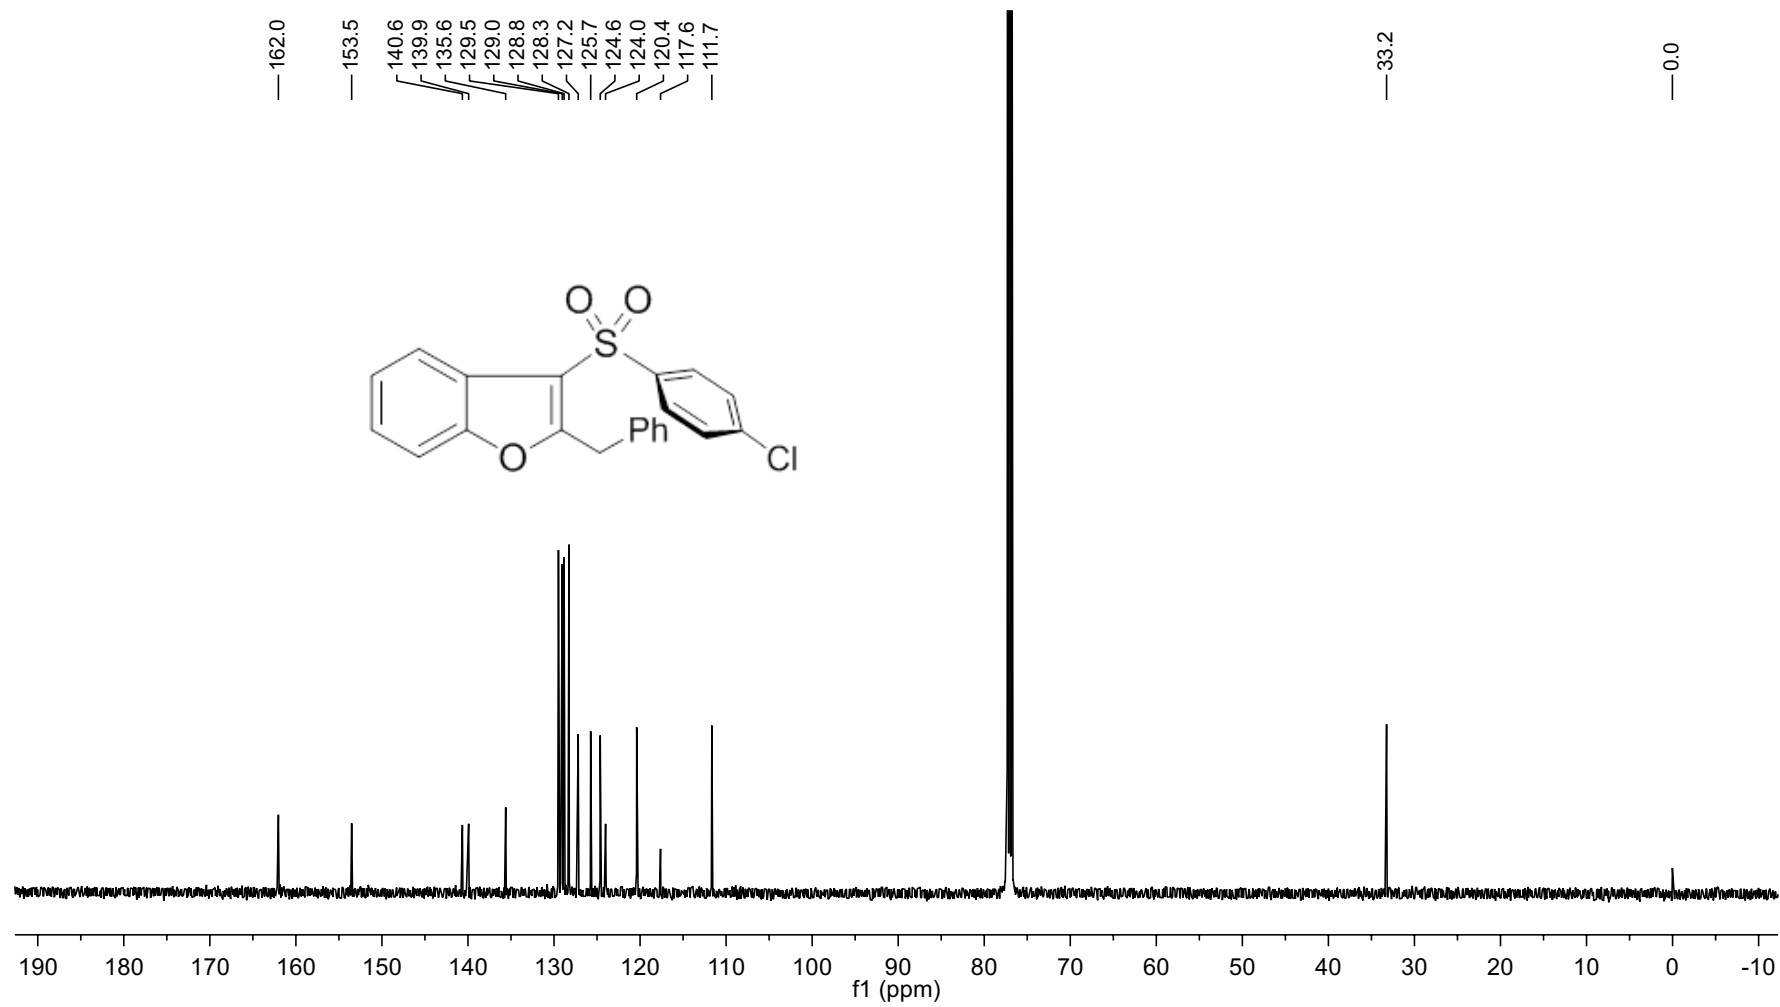

# $^1\text{H}$ NMR Spectroscopy of **4cf**

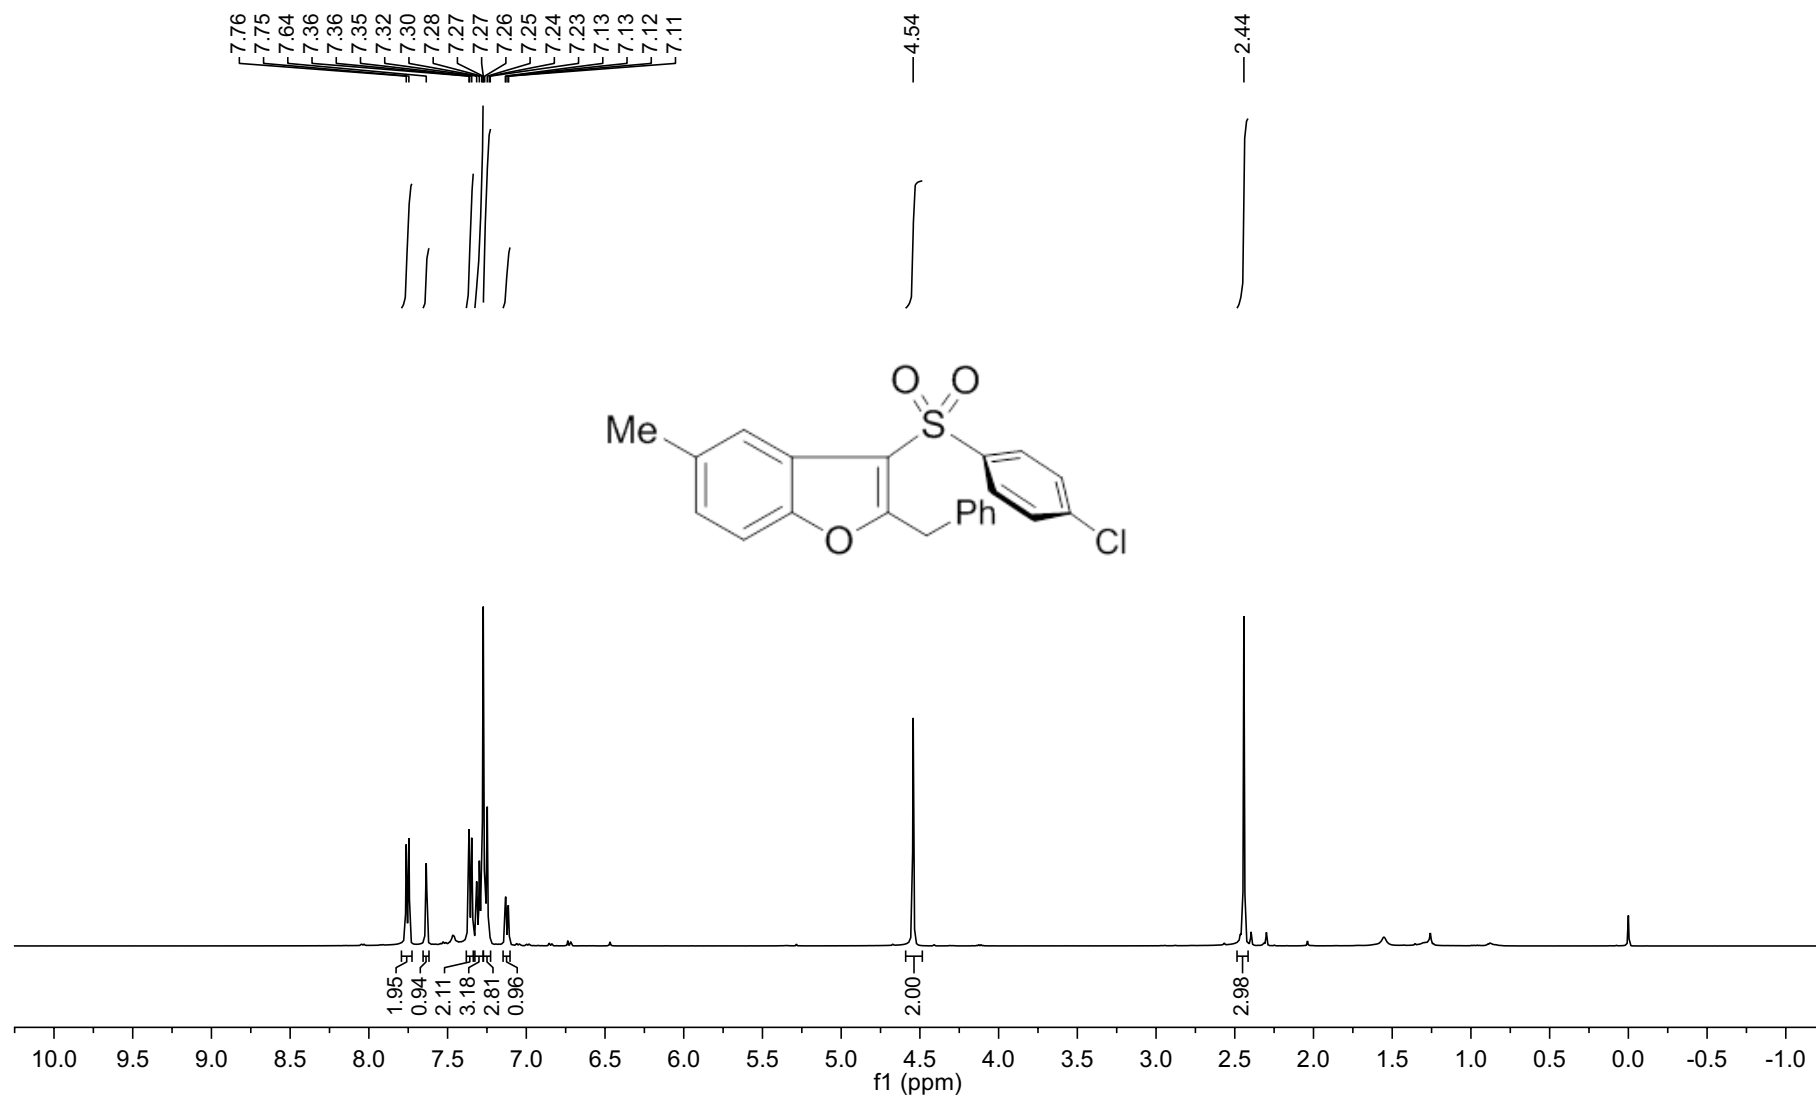

# $^{13}\text{C}$ NMR Spectroscopy of **4cf**

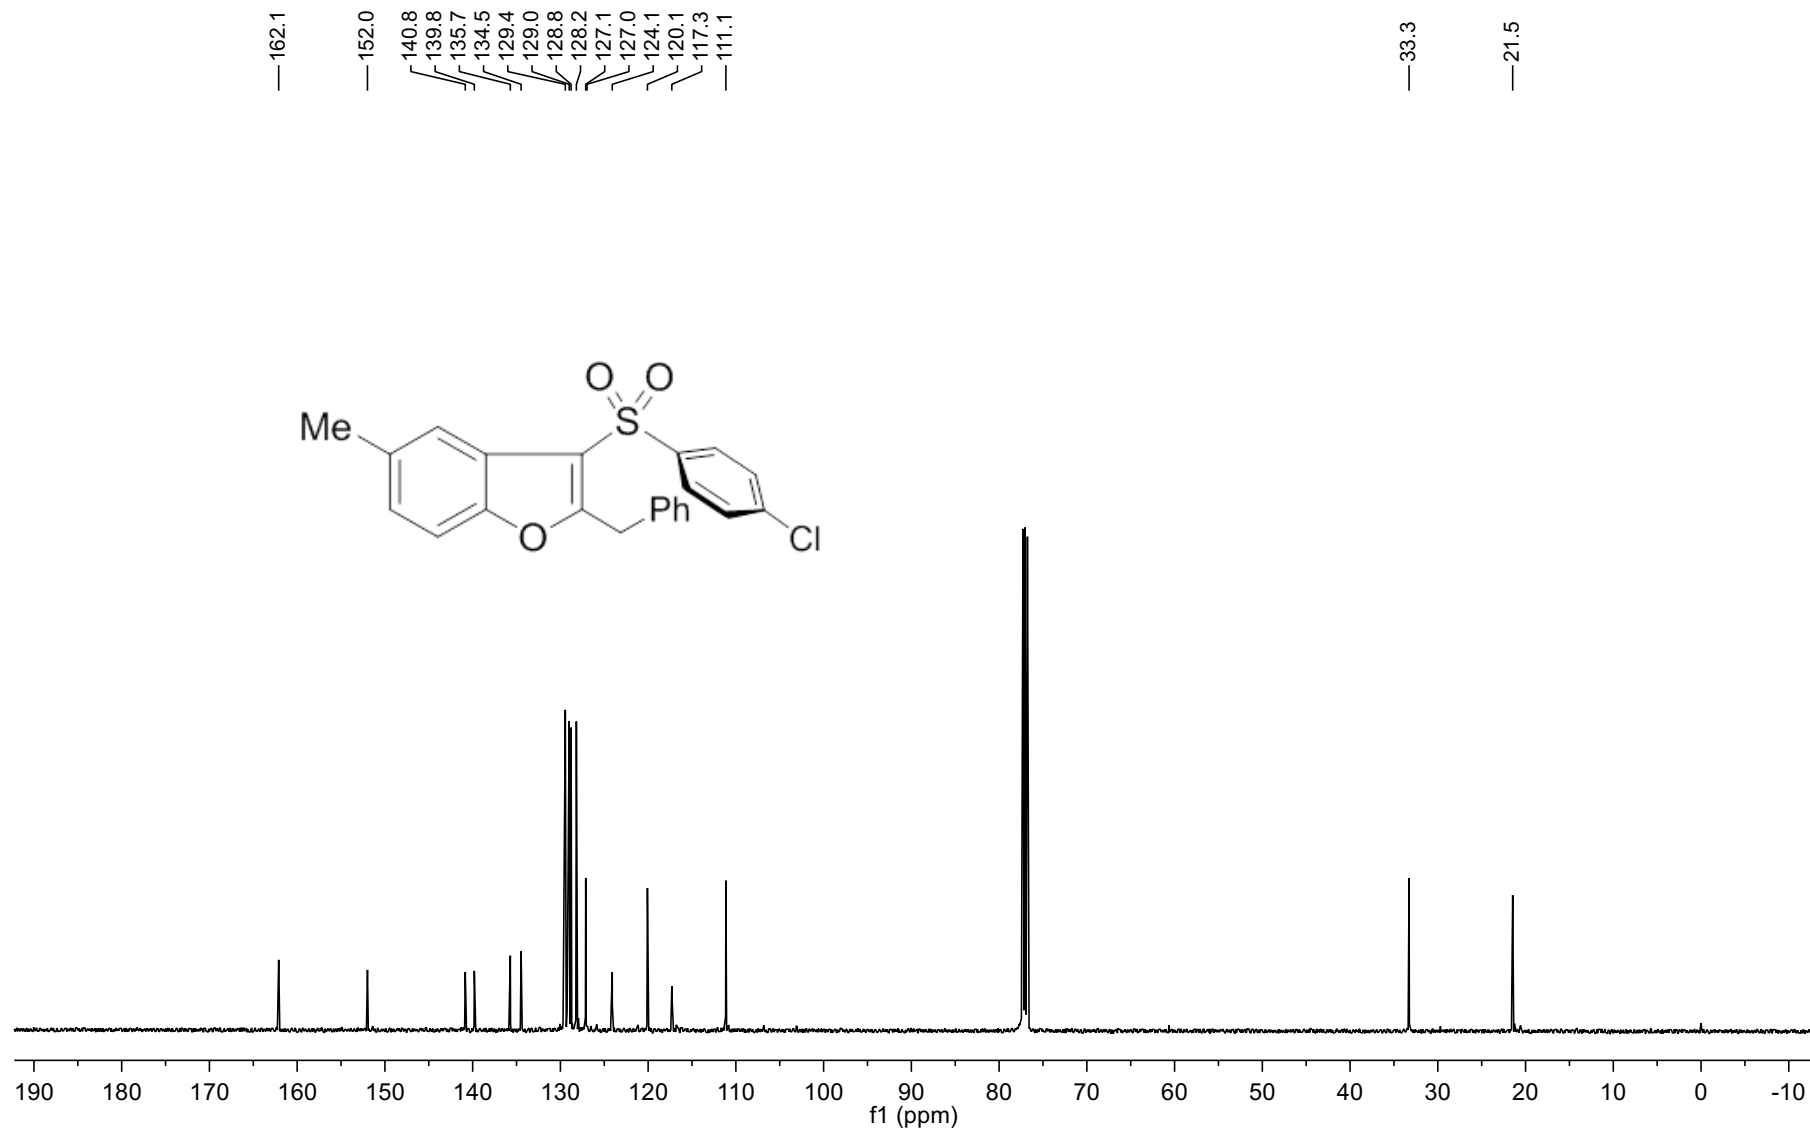



# $^1\text{H}$ NMR Spectroscopy of **4ag**

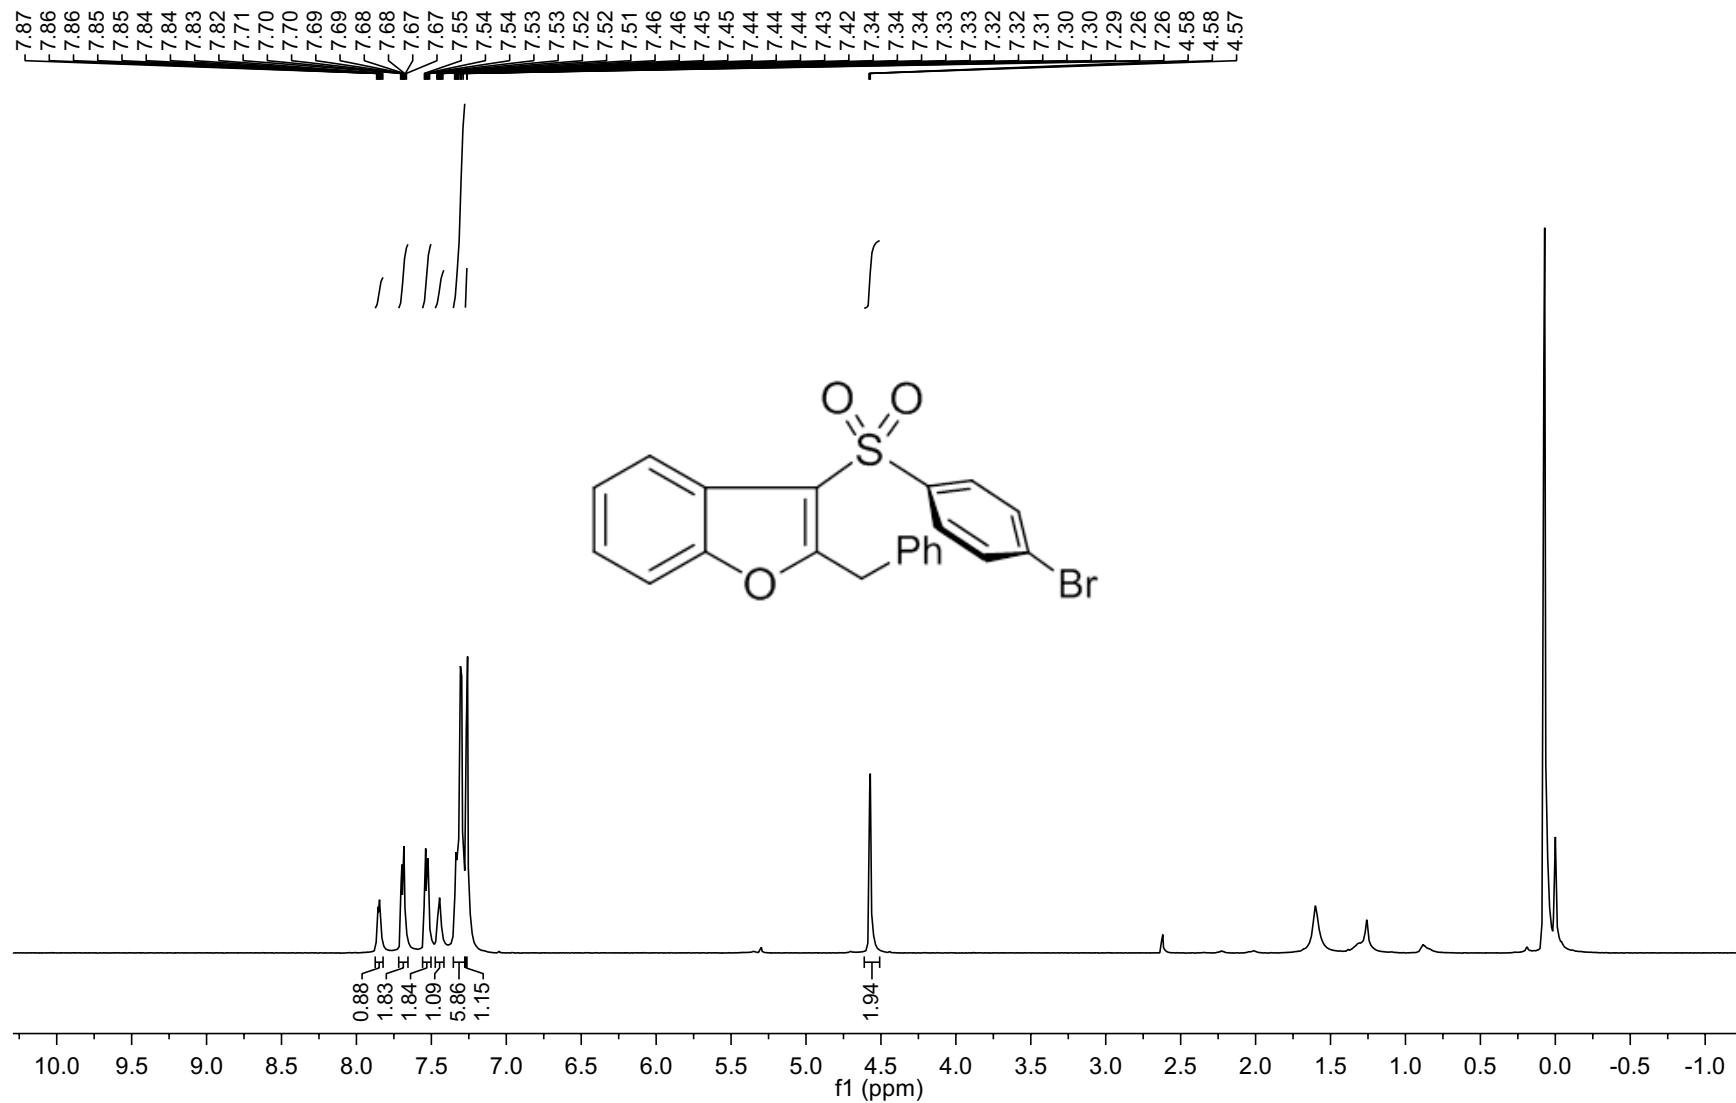

# $^{13}\text{C}$ NMR Spectroscopy of **4ag**

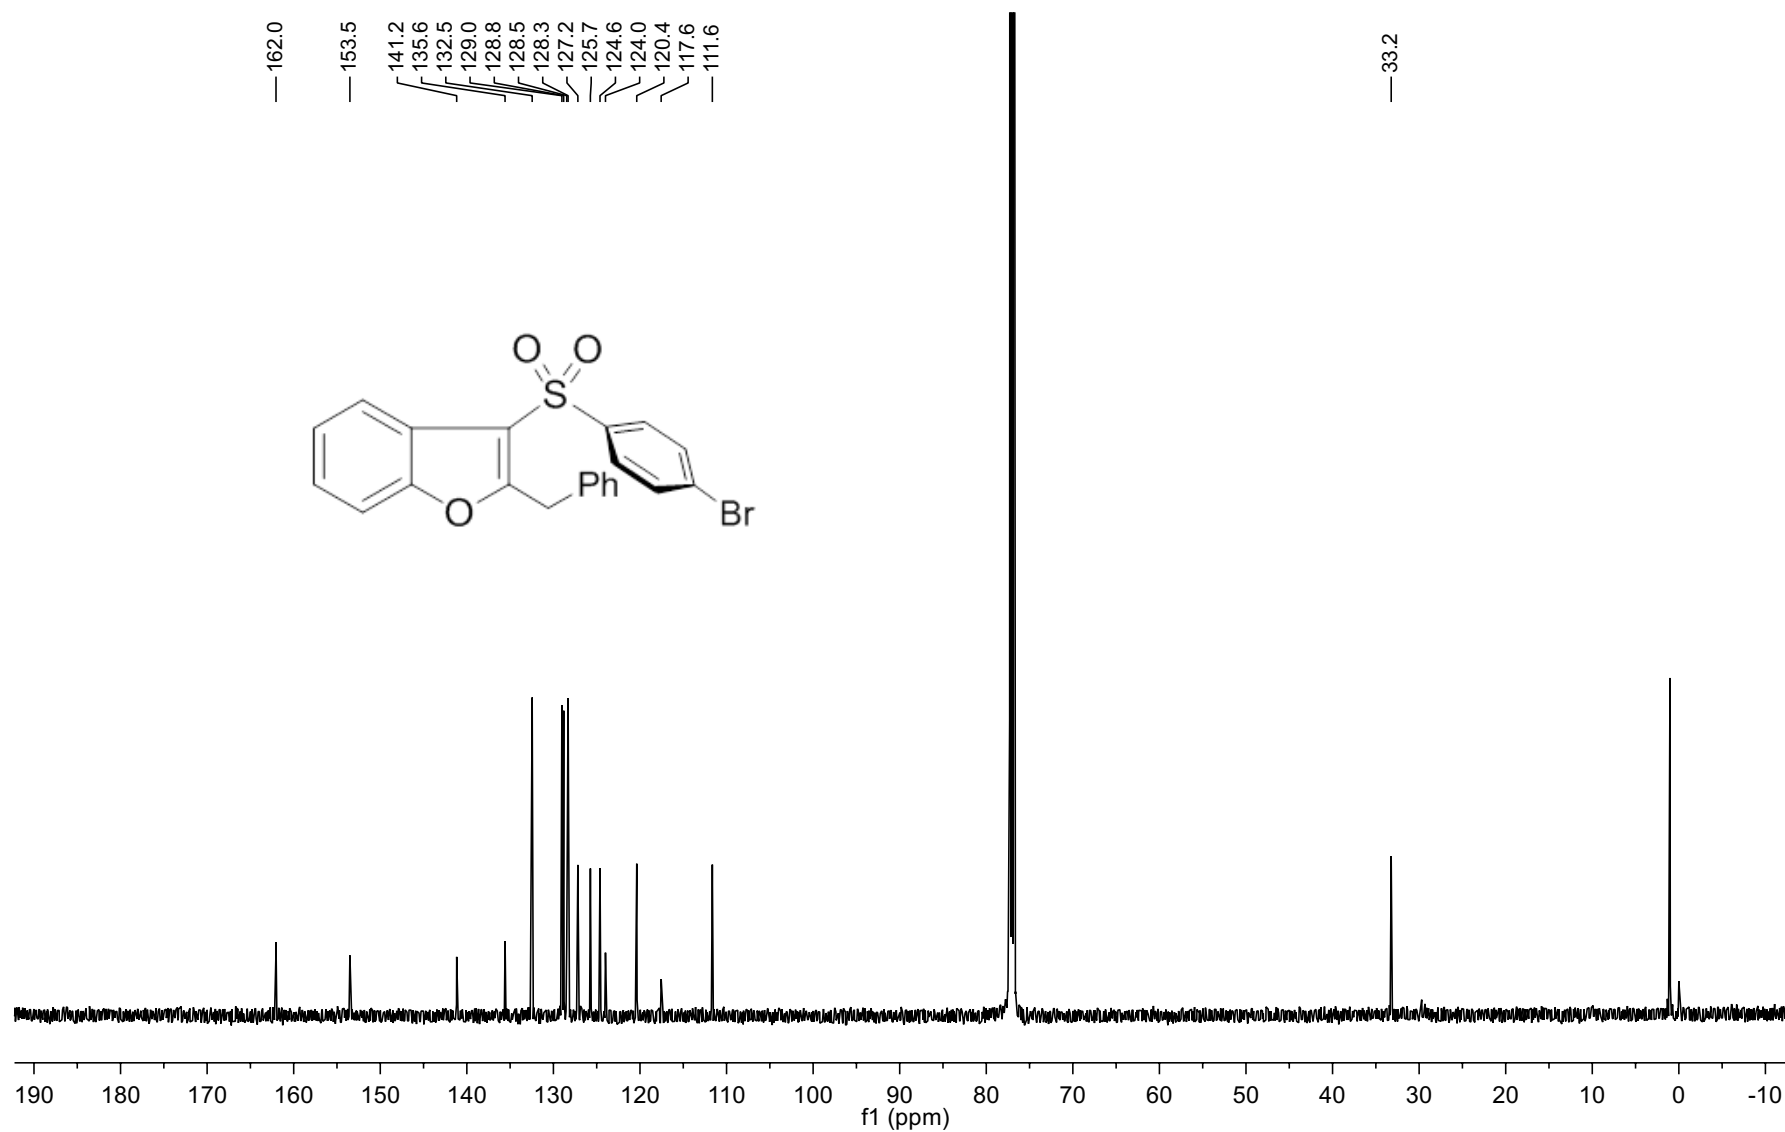

# $^1\text{H}$ NMR Spectroscopy of **4dg**

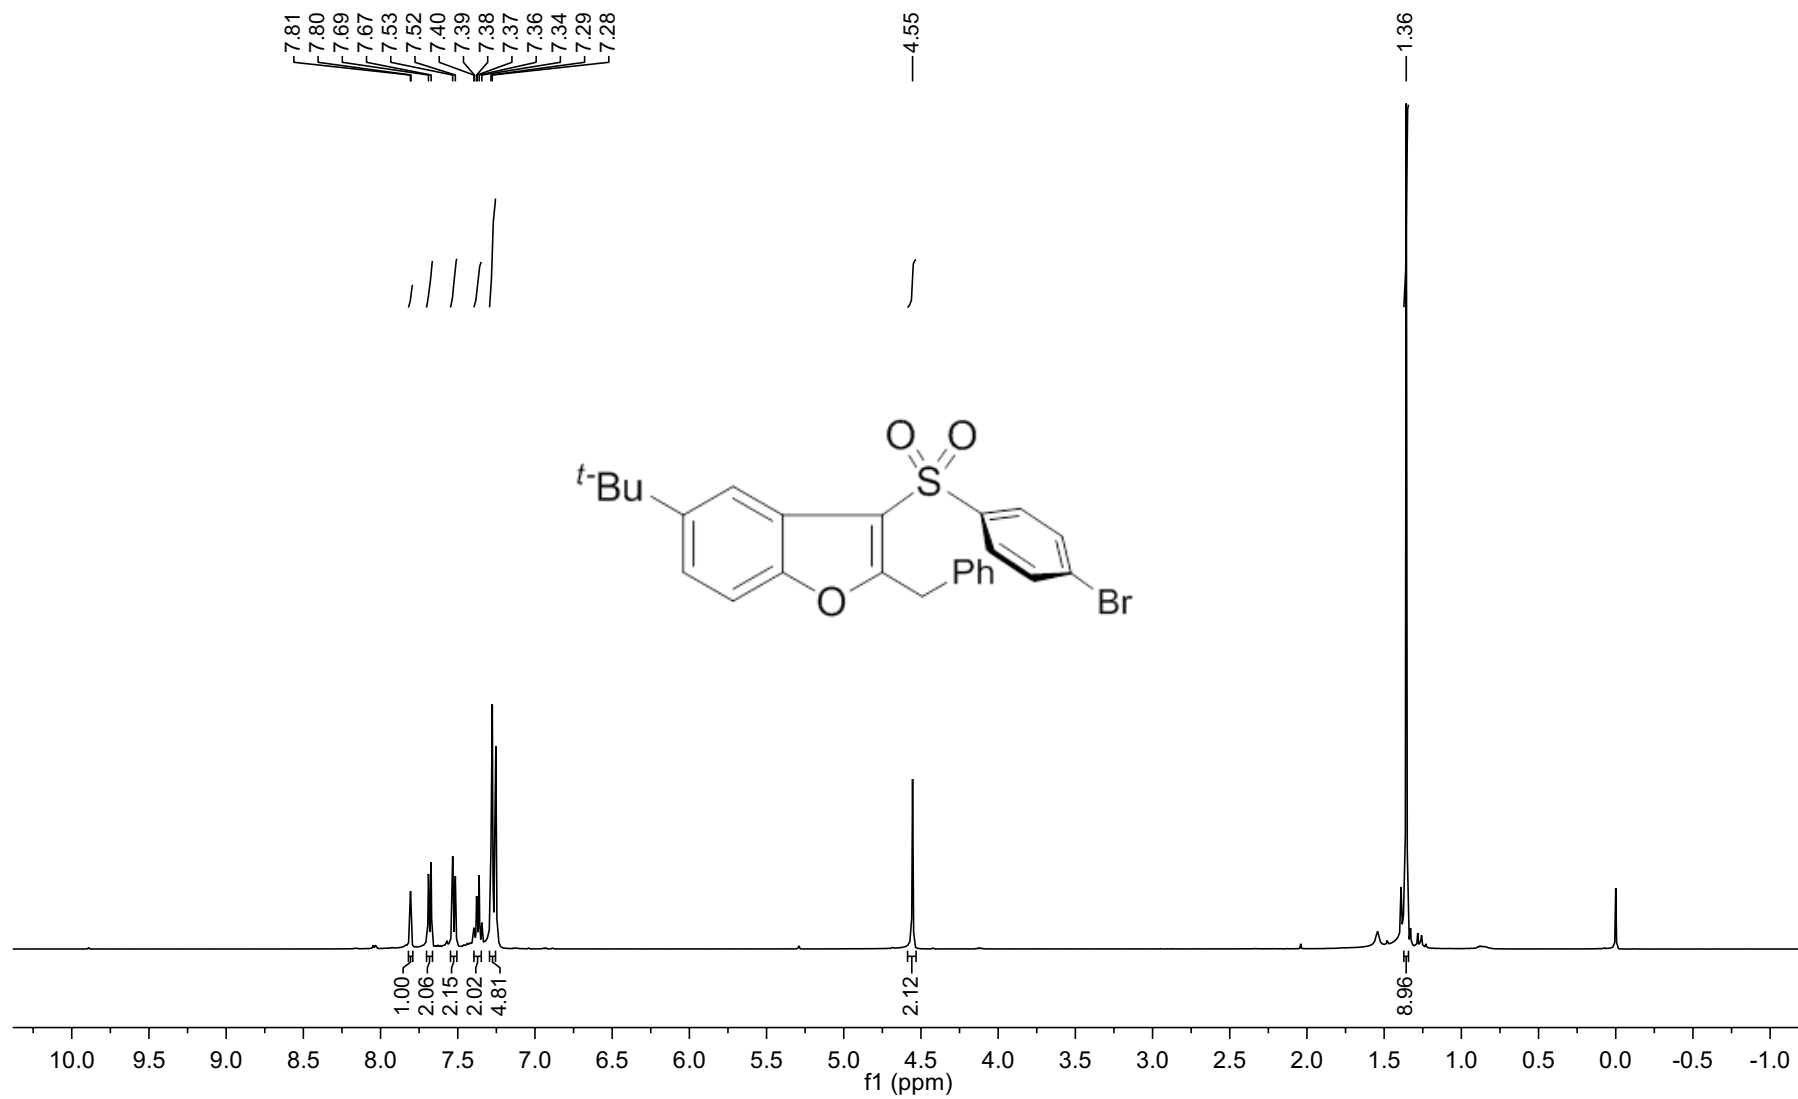

# $^{13}\text{C}$ NMR Spectroscopy of **4dg**

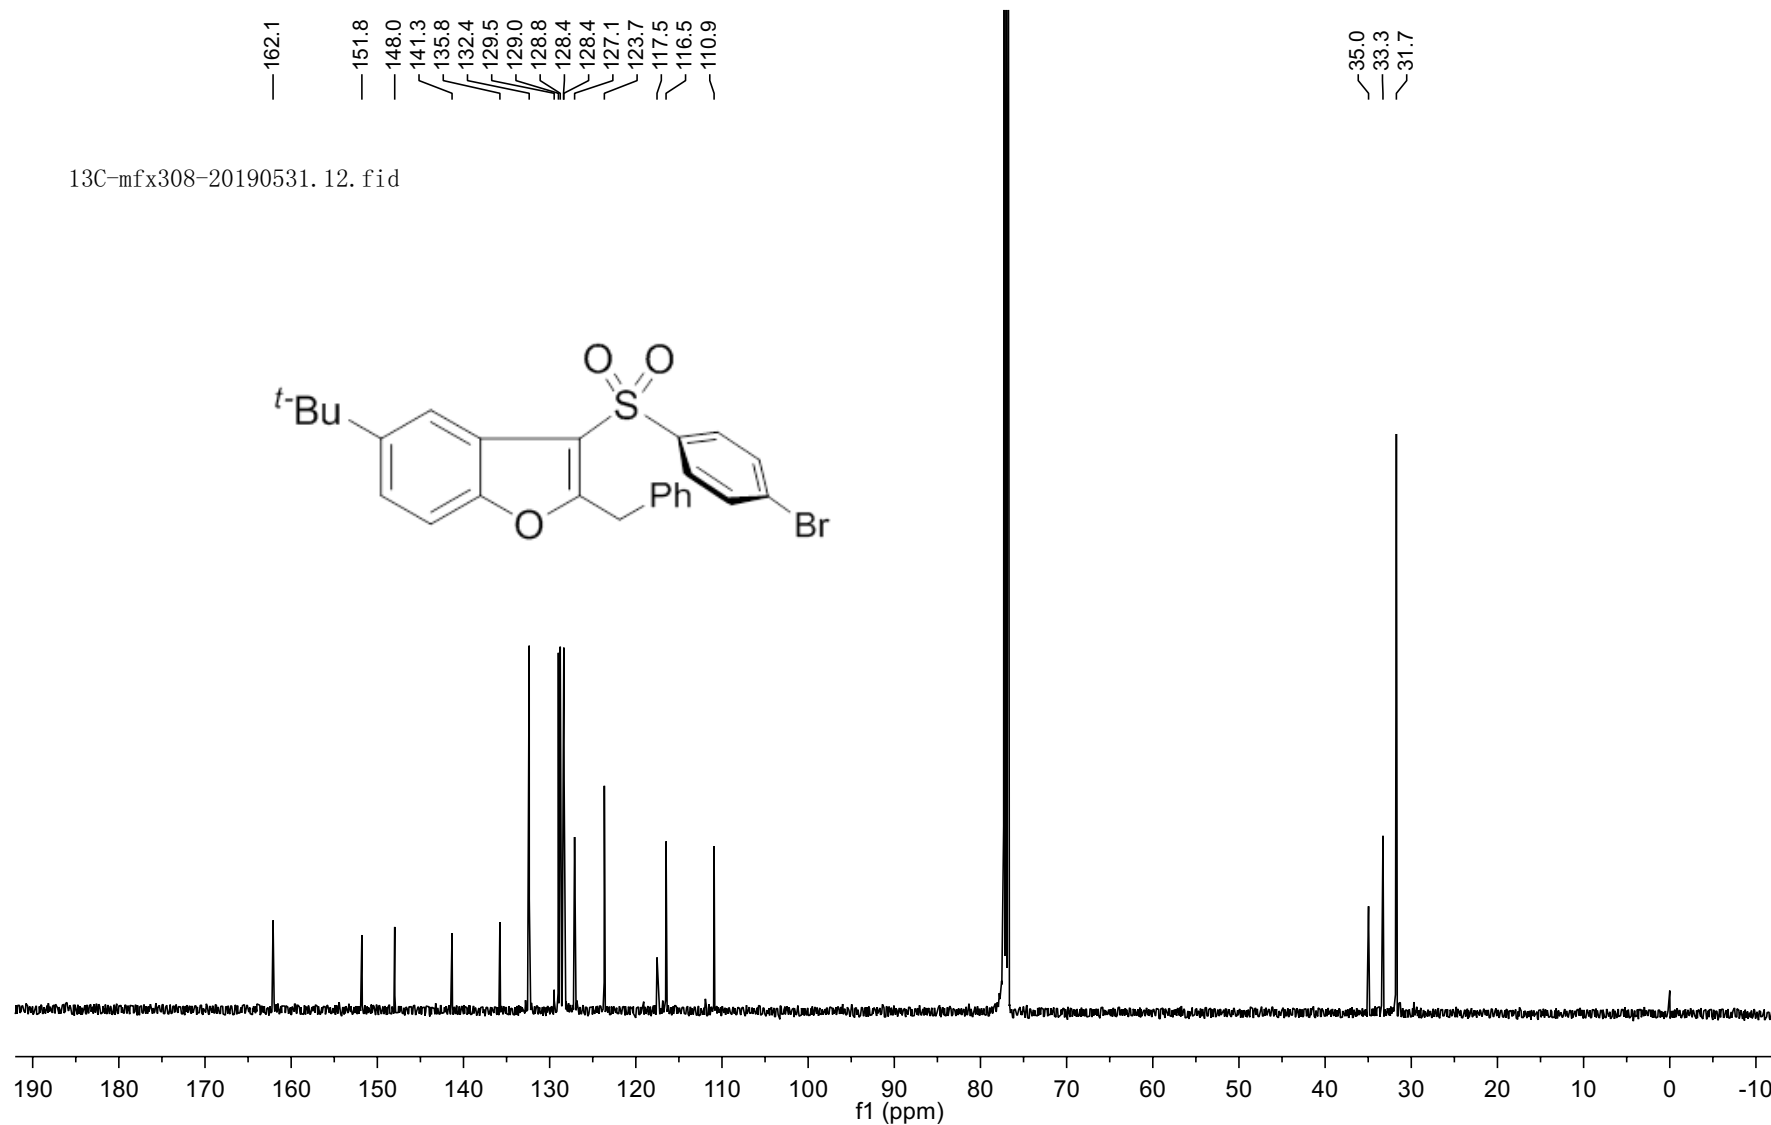

# $^1\text{H}$ NMR Spectroscopy of **4eg**

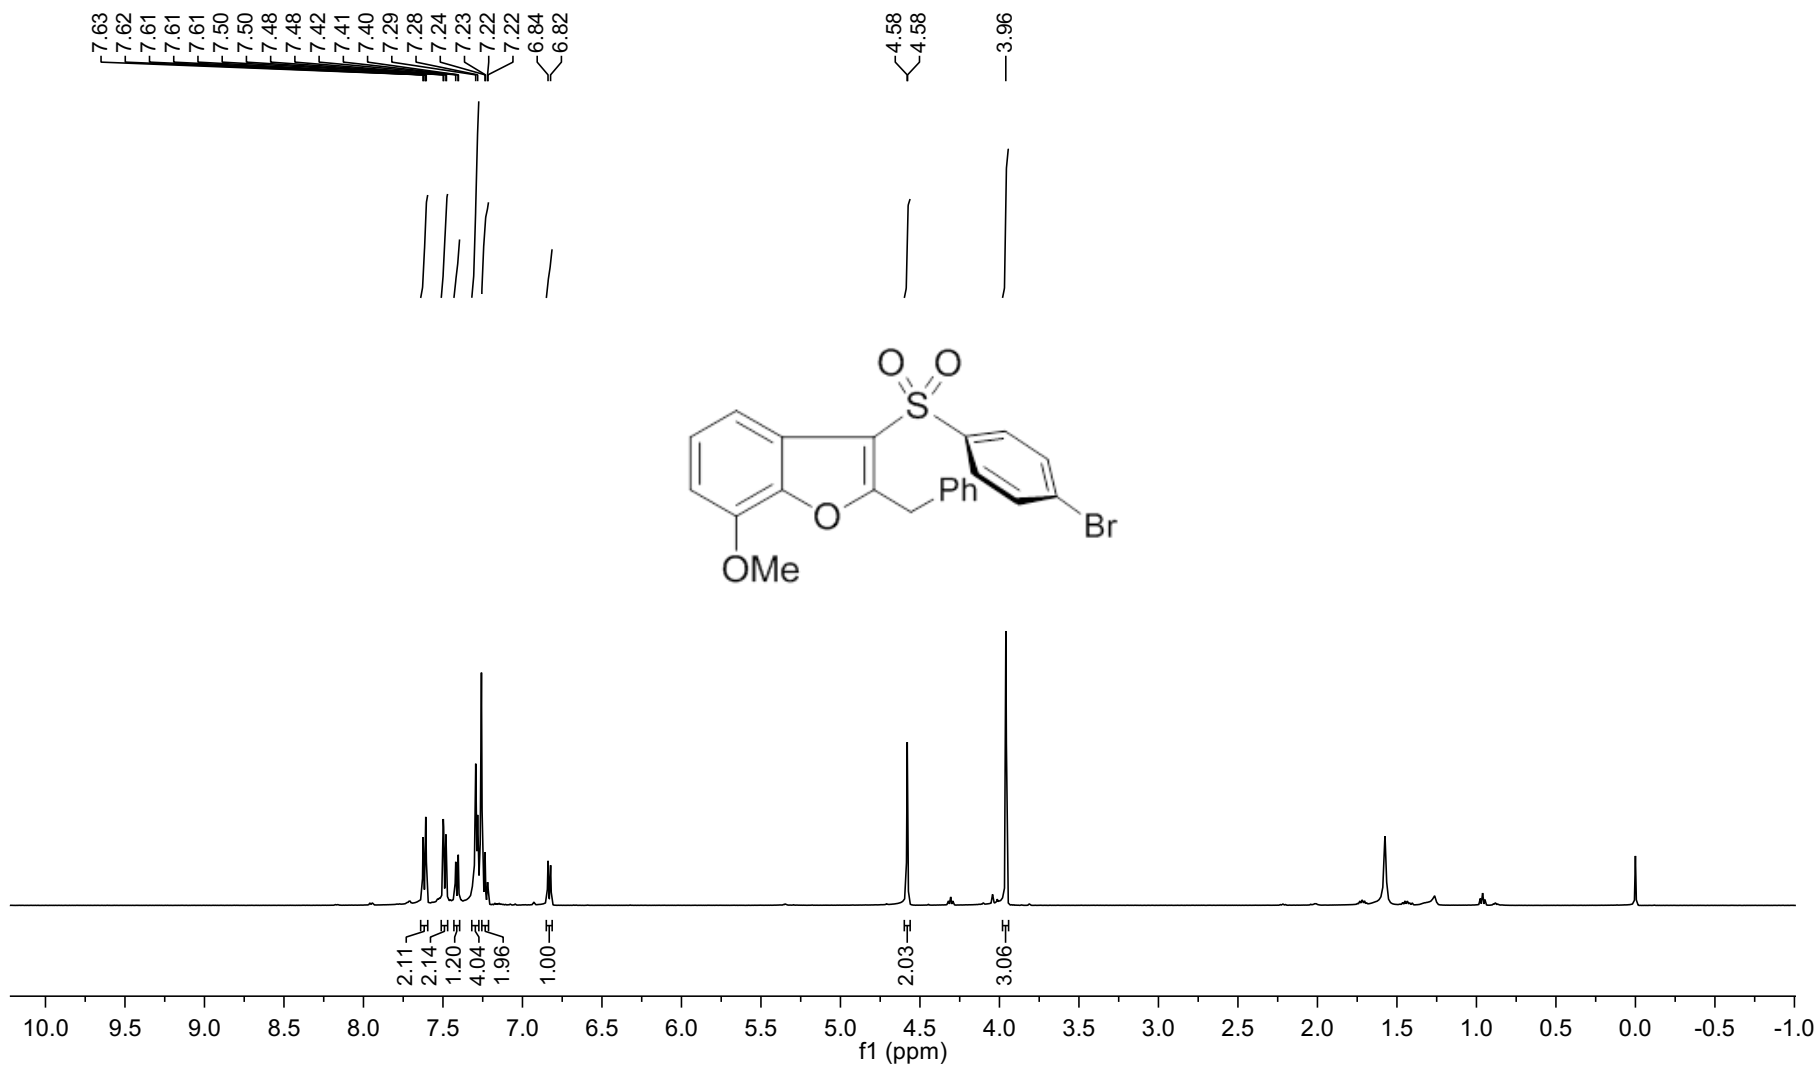

# $^{13}\text{C}$ NMR Spectroscopy of **4eg**

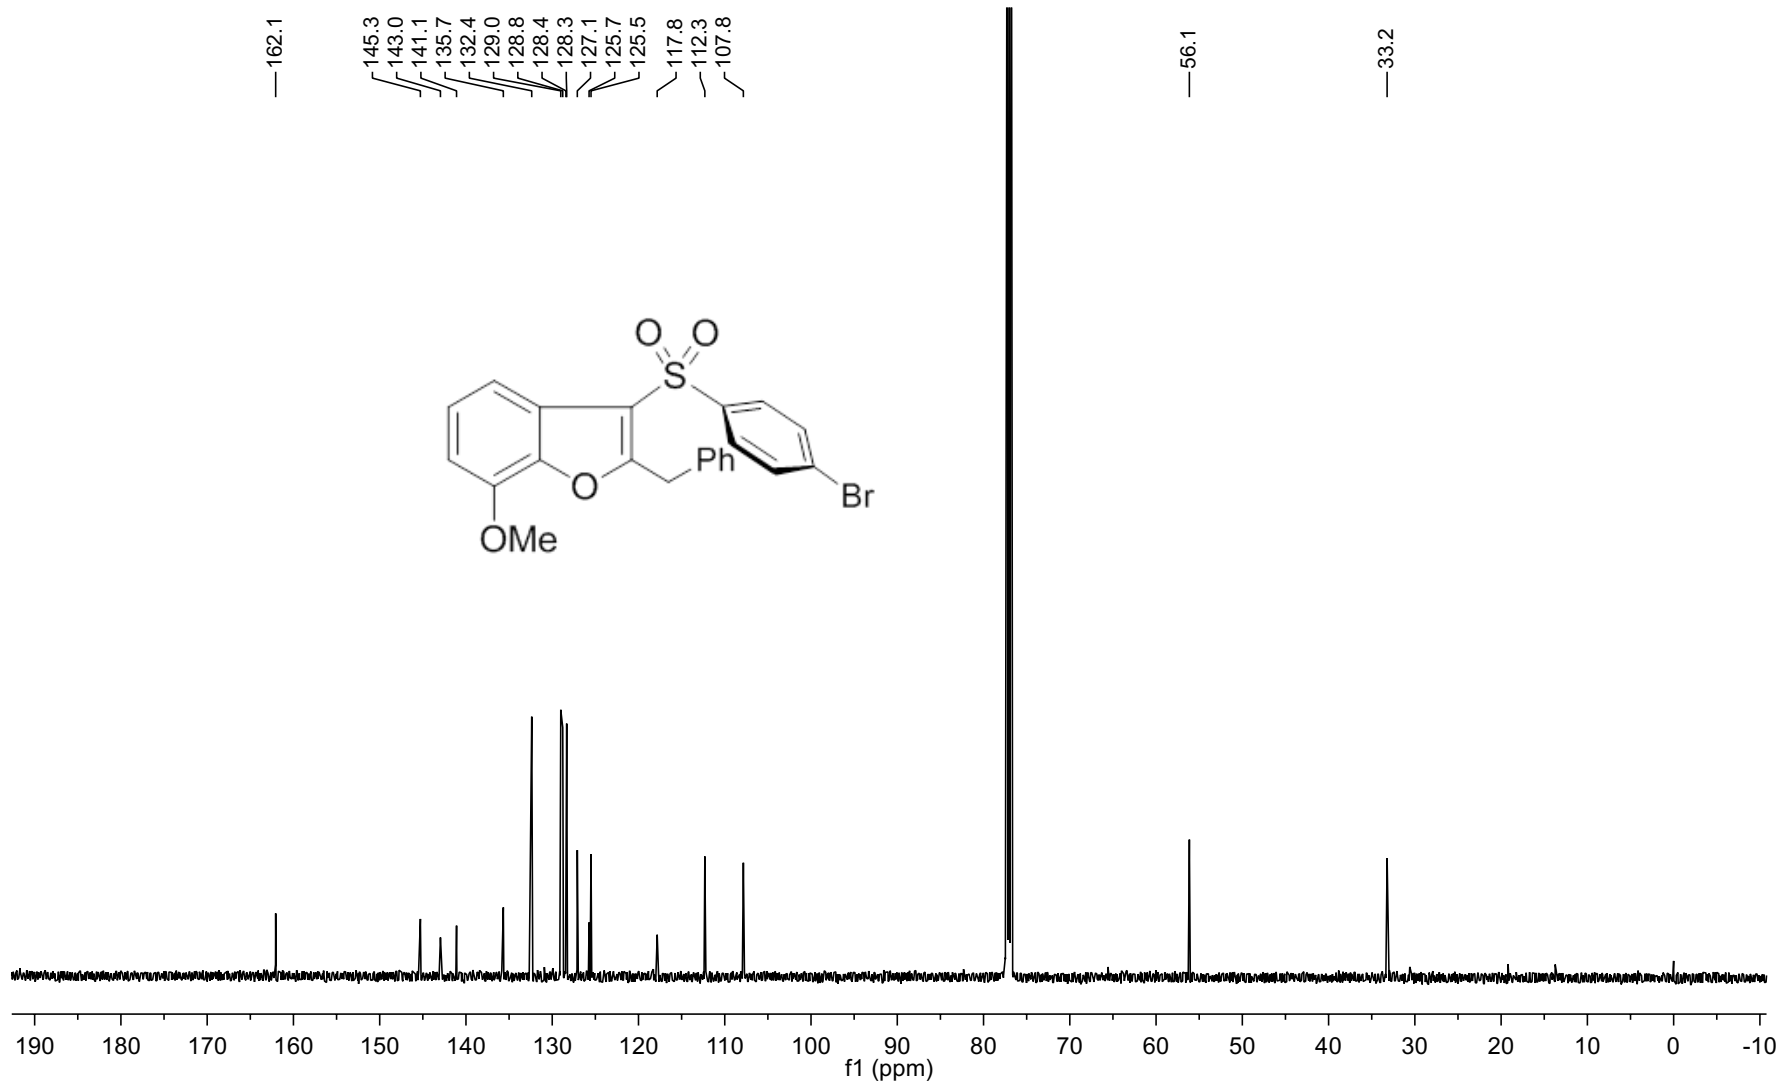

# <sup>1</sup>H NMR Spectroscopy of **4ig**

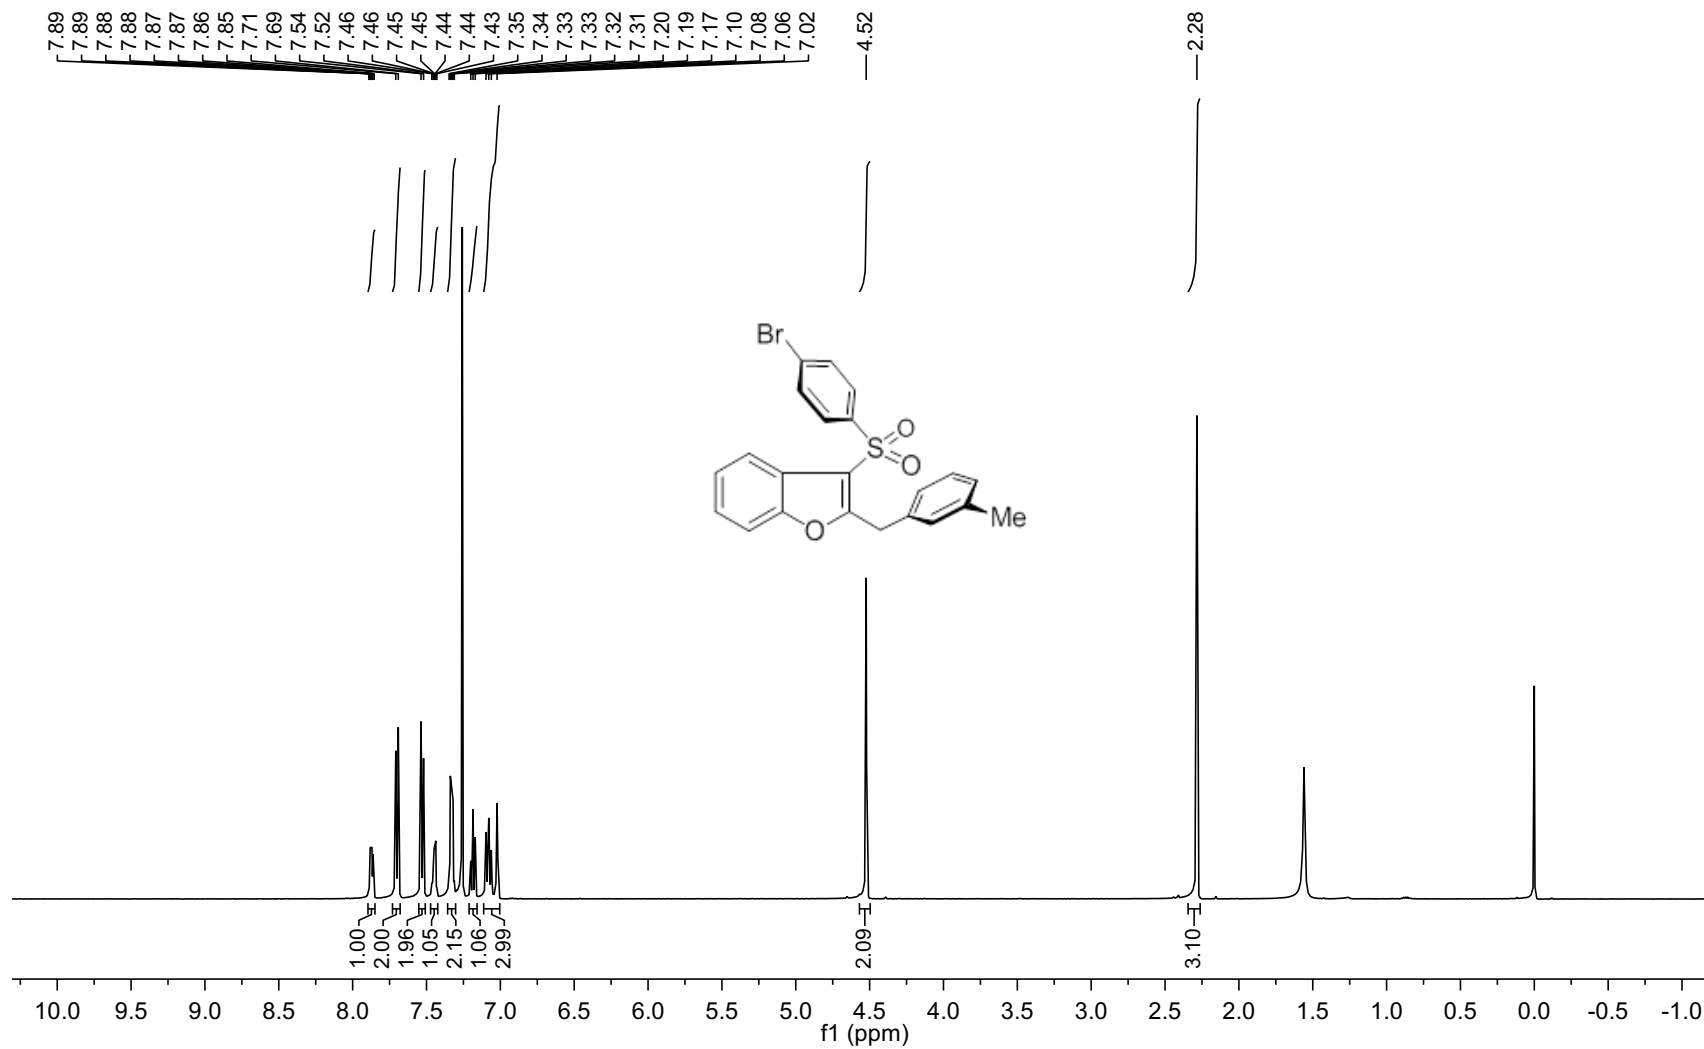

# $^{13}\text{C}$ NMR Spectroscopy of **4ig**

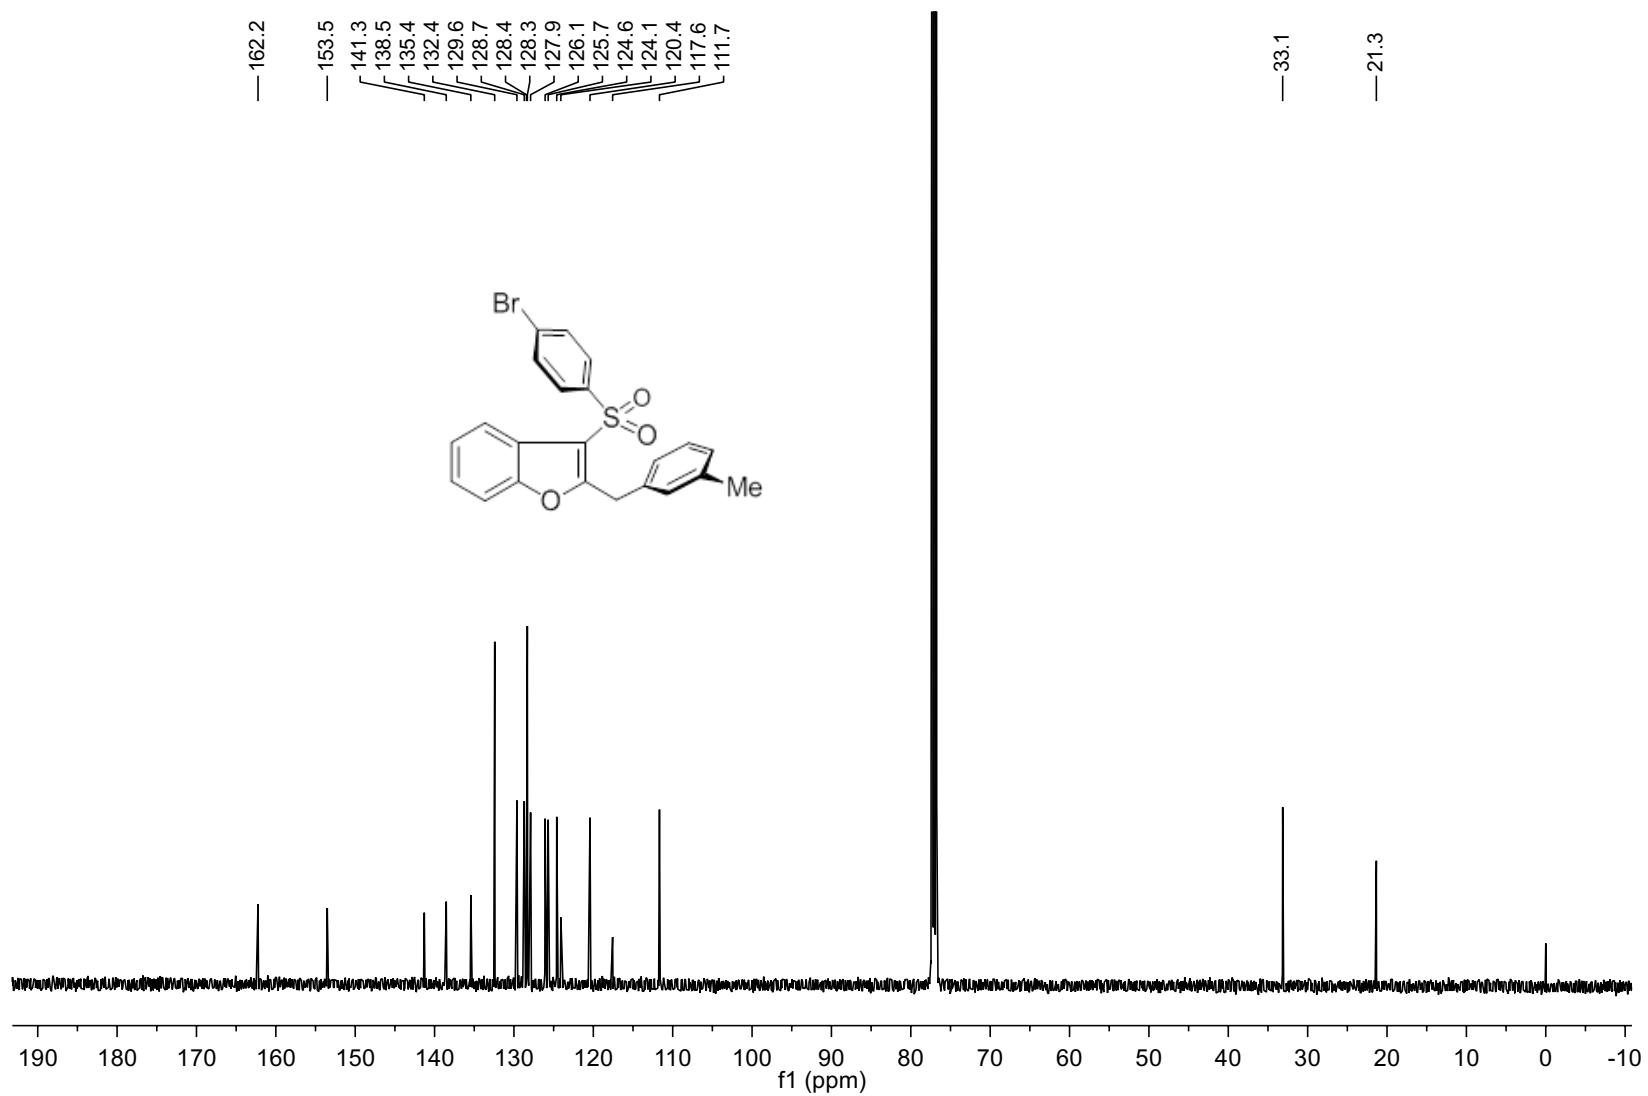



# $^1\text{H}$ NMR Spectroscopy of 4ah

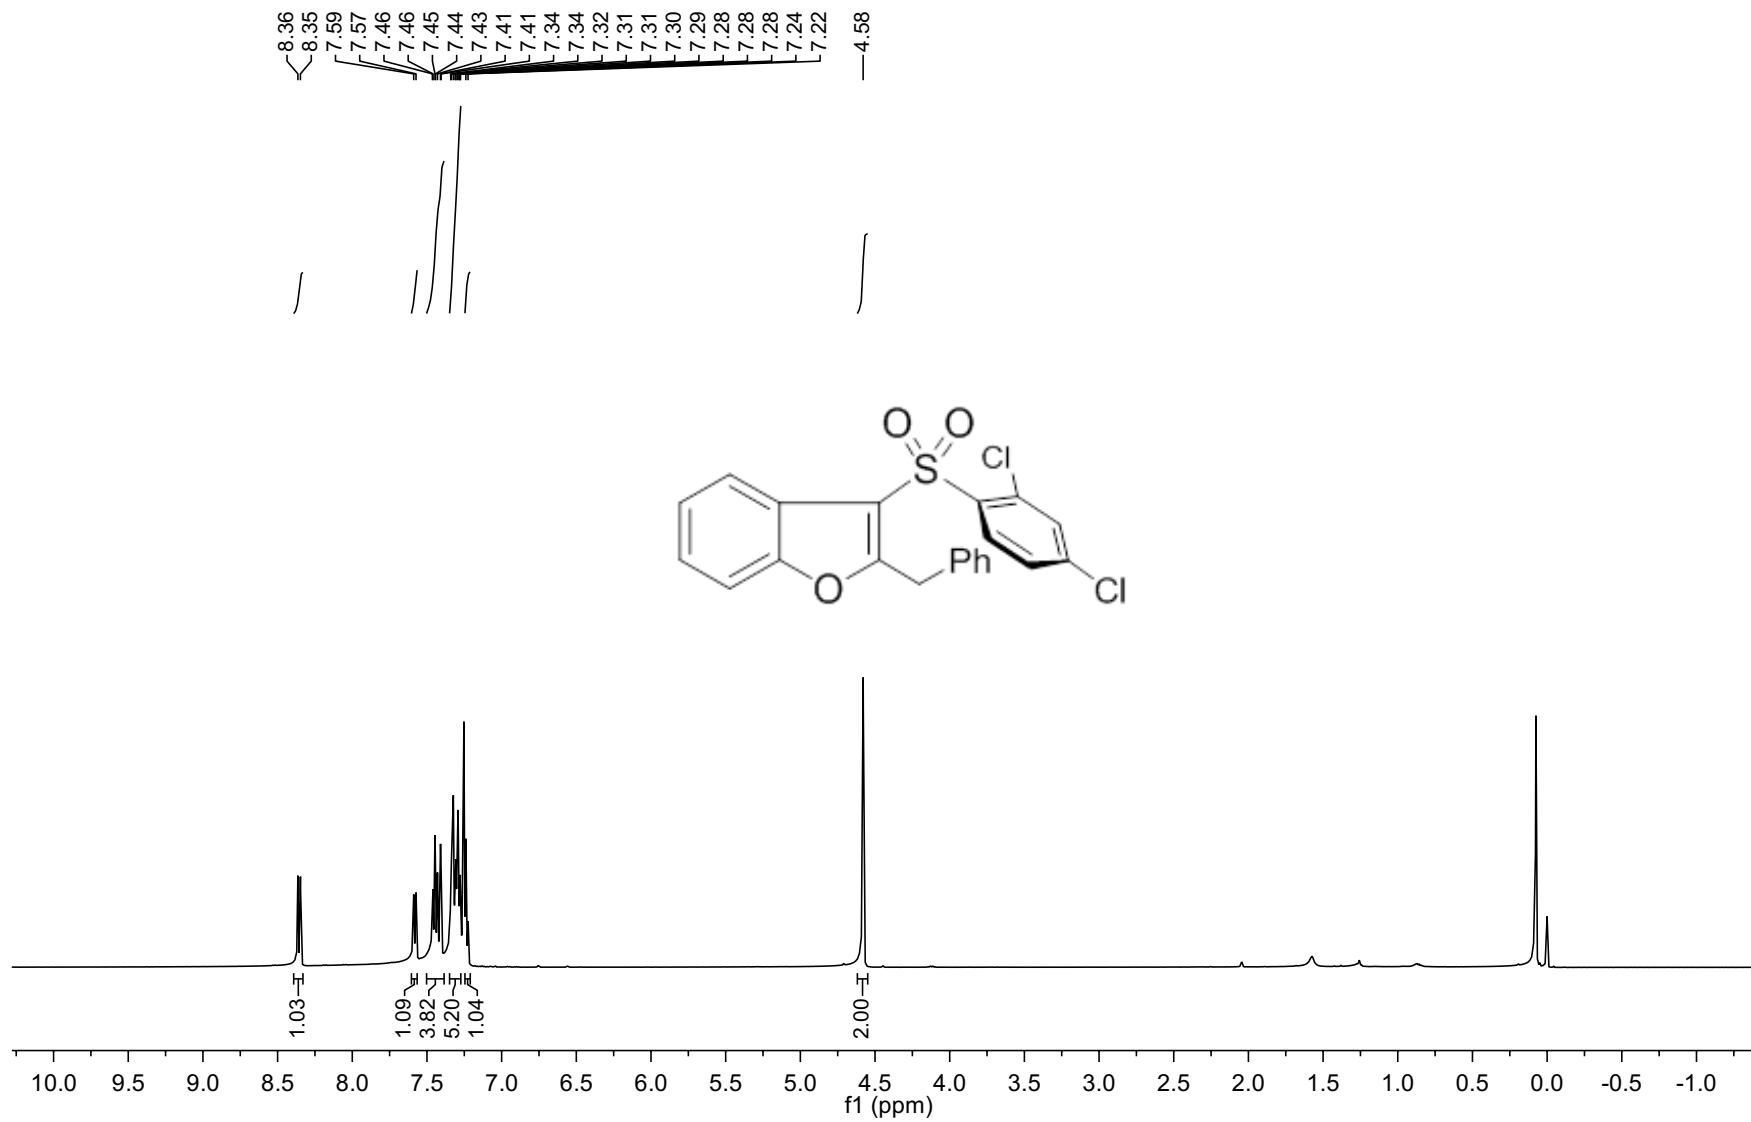

# $^{13}\text{C}$ NMR Spectroscopy of **4ah**

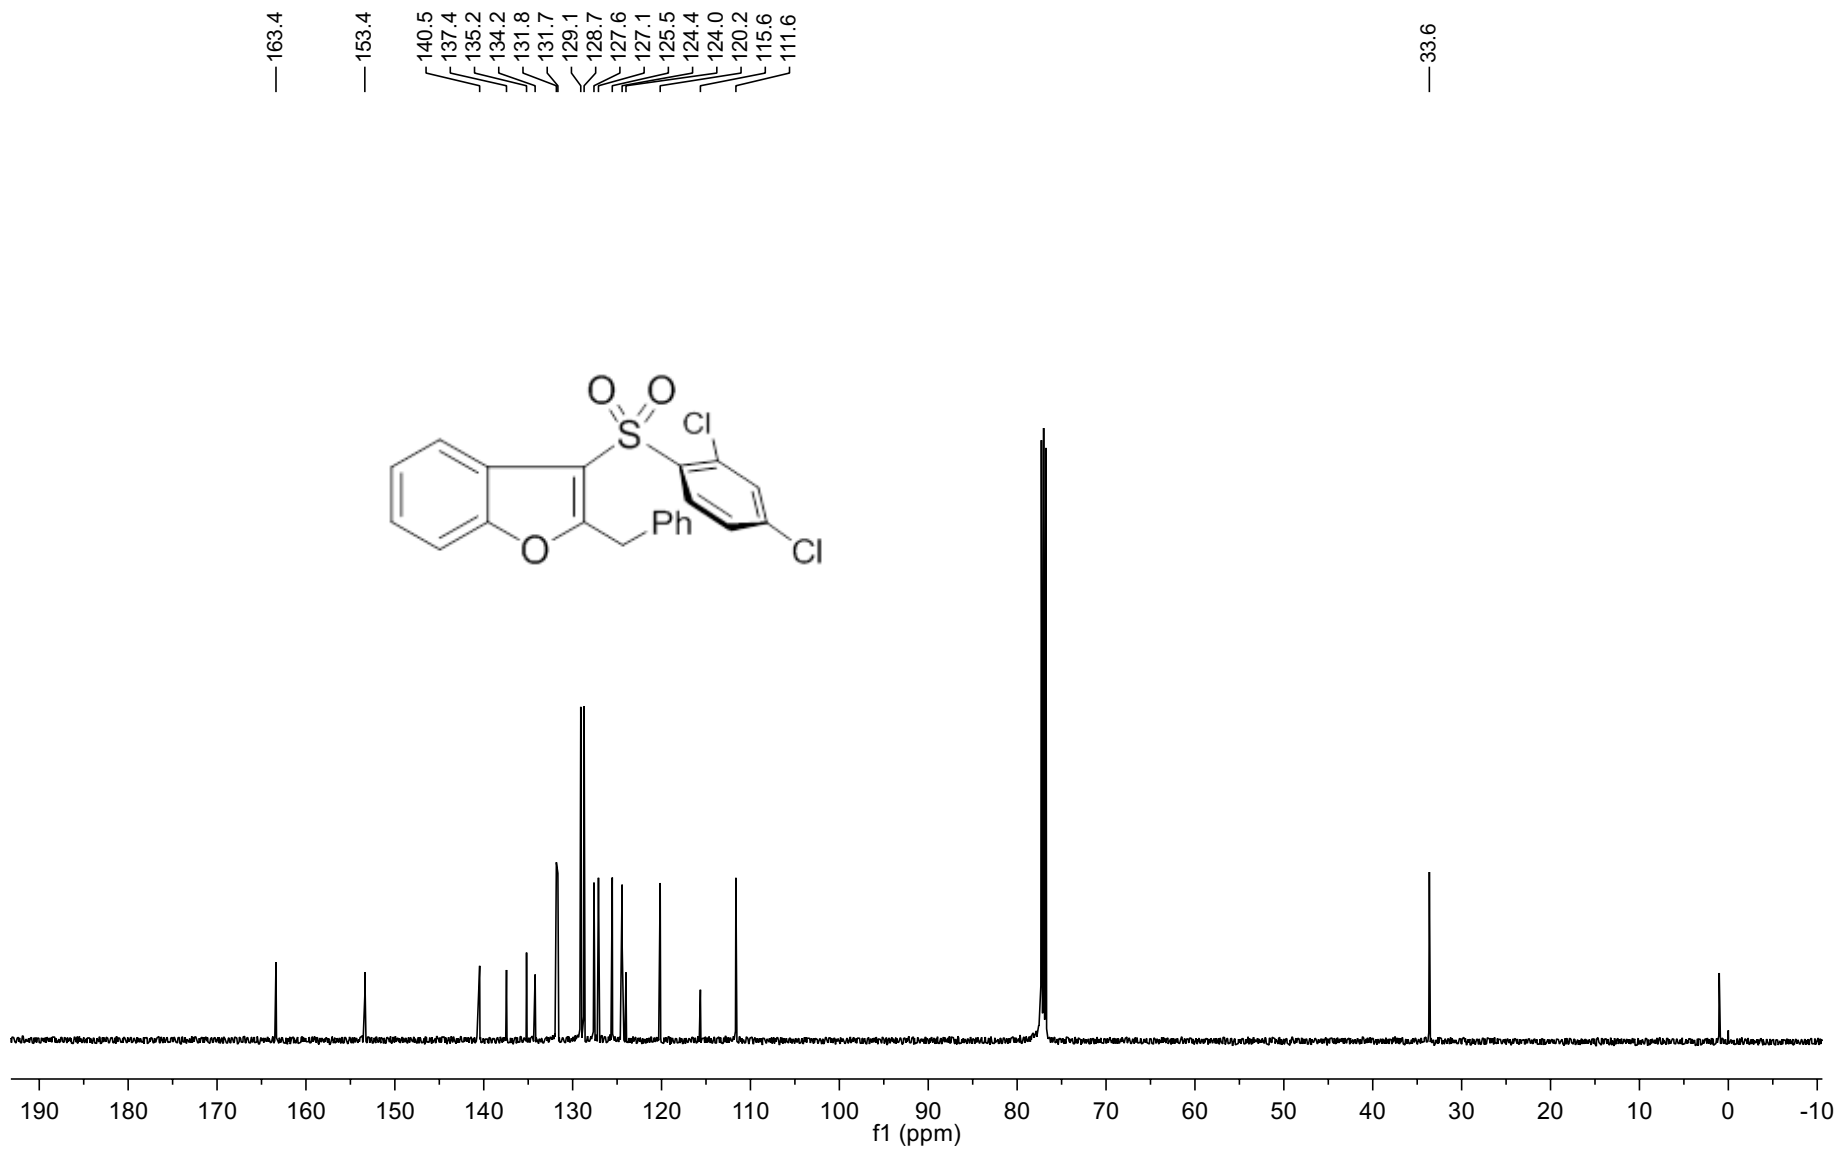

- 163.4
- 153.4
- 140.5
- 137.4
- 135.2
- 134.2
- 131.8
- 131.7
- 129.1
- 128.7
- 127.6
- 127.1
- 125.5
- 124.4
- 124.4
- 124.0
- 120.2
- 115.6
- 111.6
- 33.6

# <sup>1</sup>H NMR Spectroscopy of **4ai**

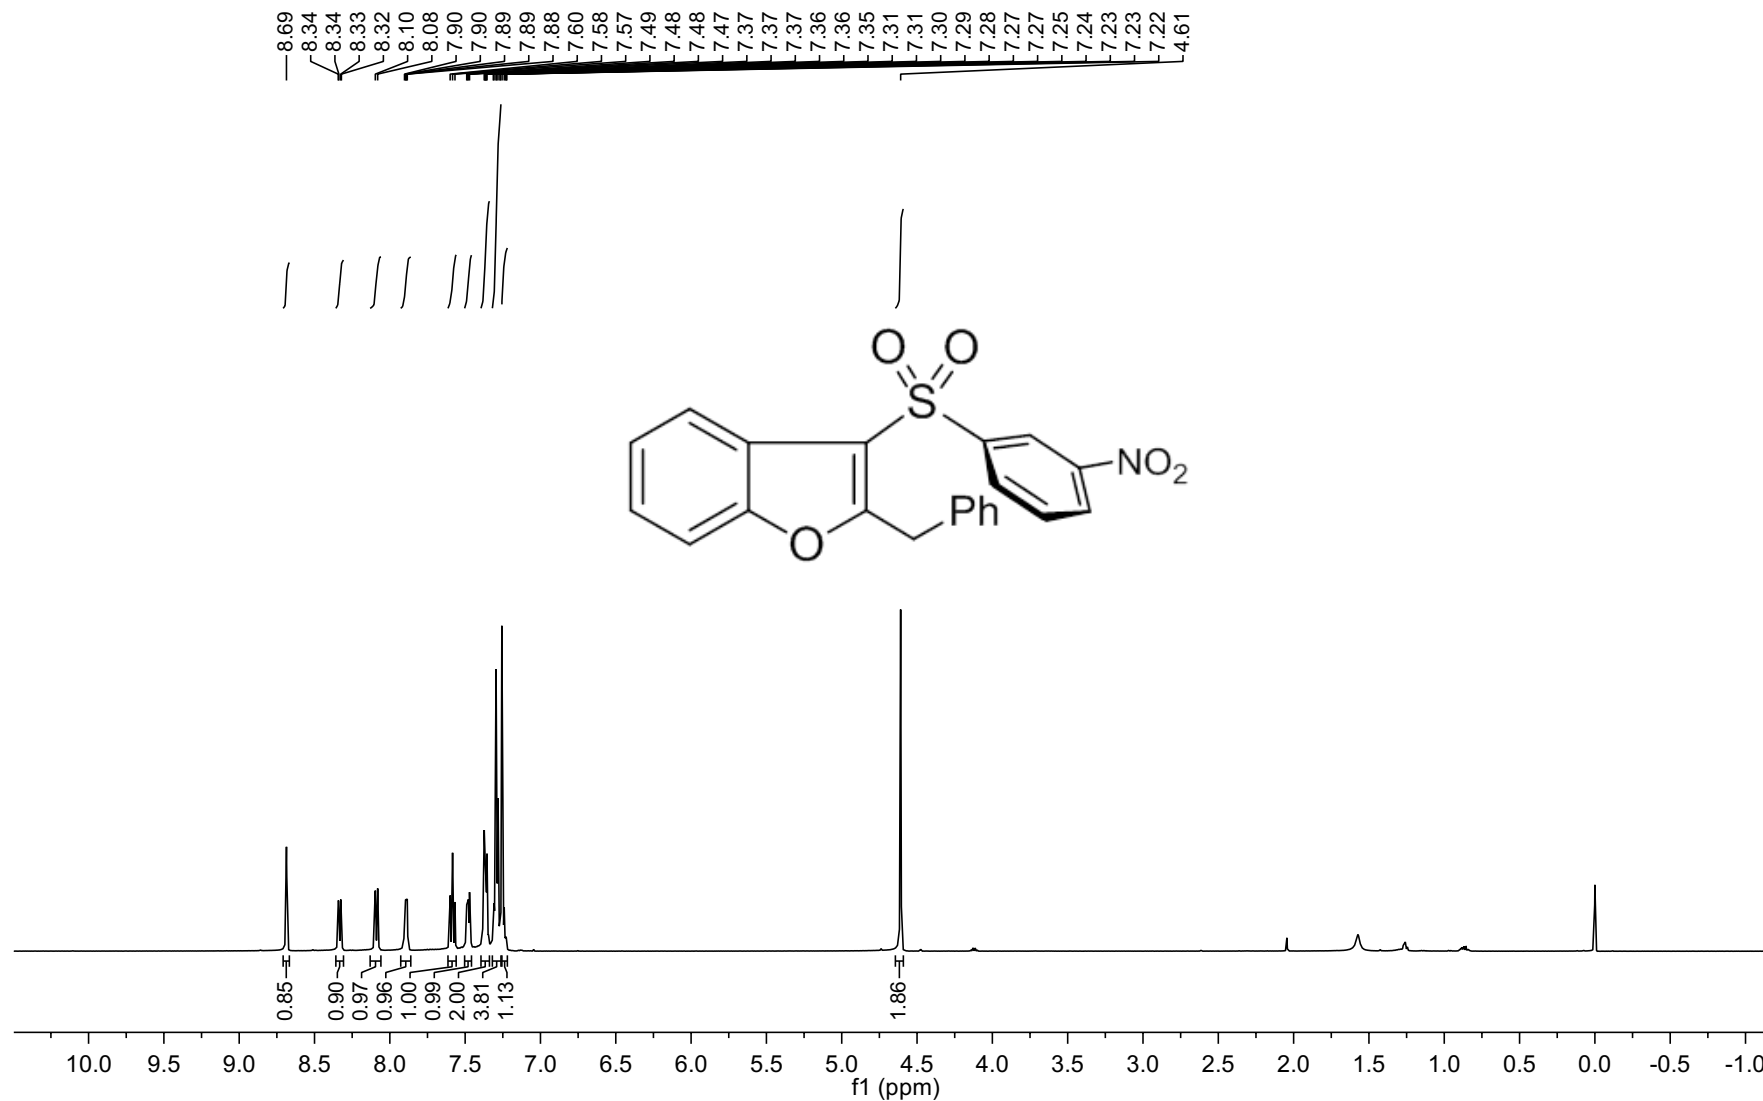

# $^{13}\text{C}$ NMR Spectroscopy of **4ai**

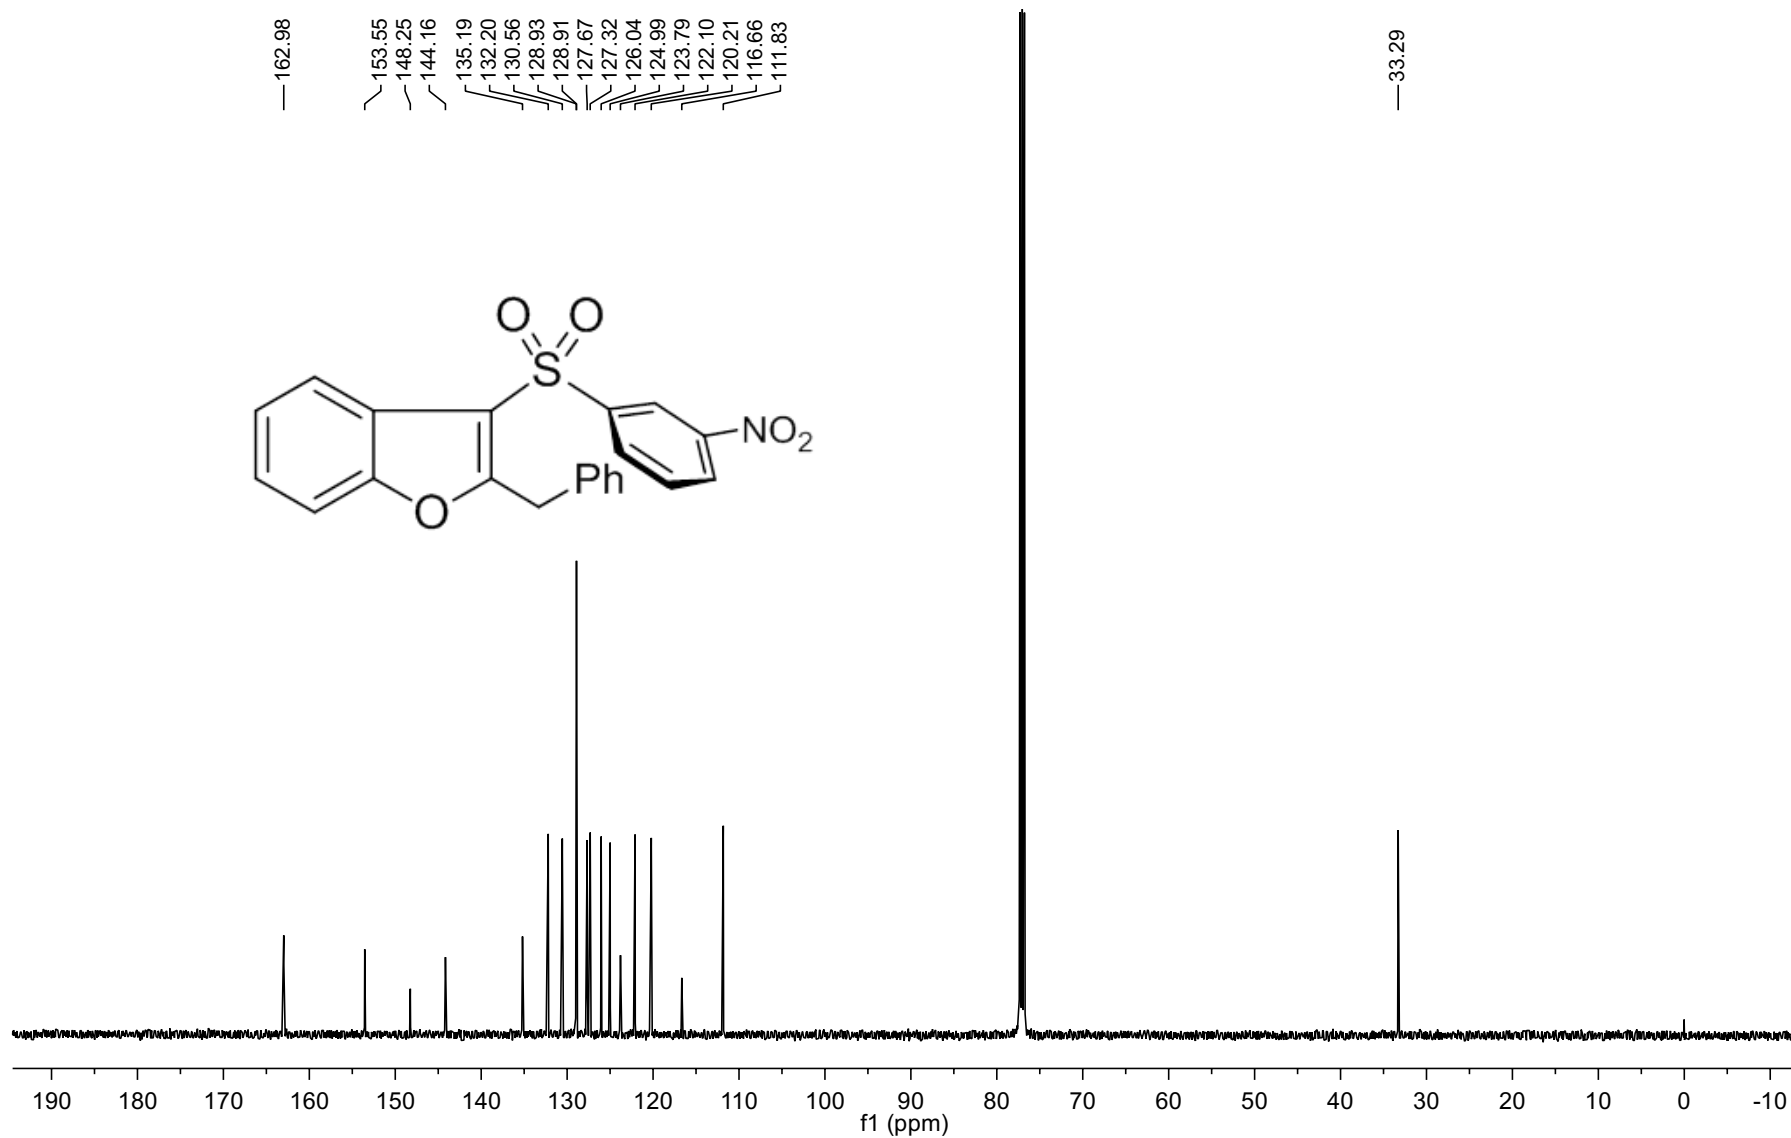

# $^1\text{H}$ NMR Spectroscopy of **4aj**

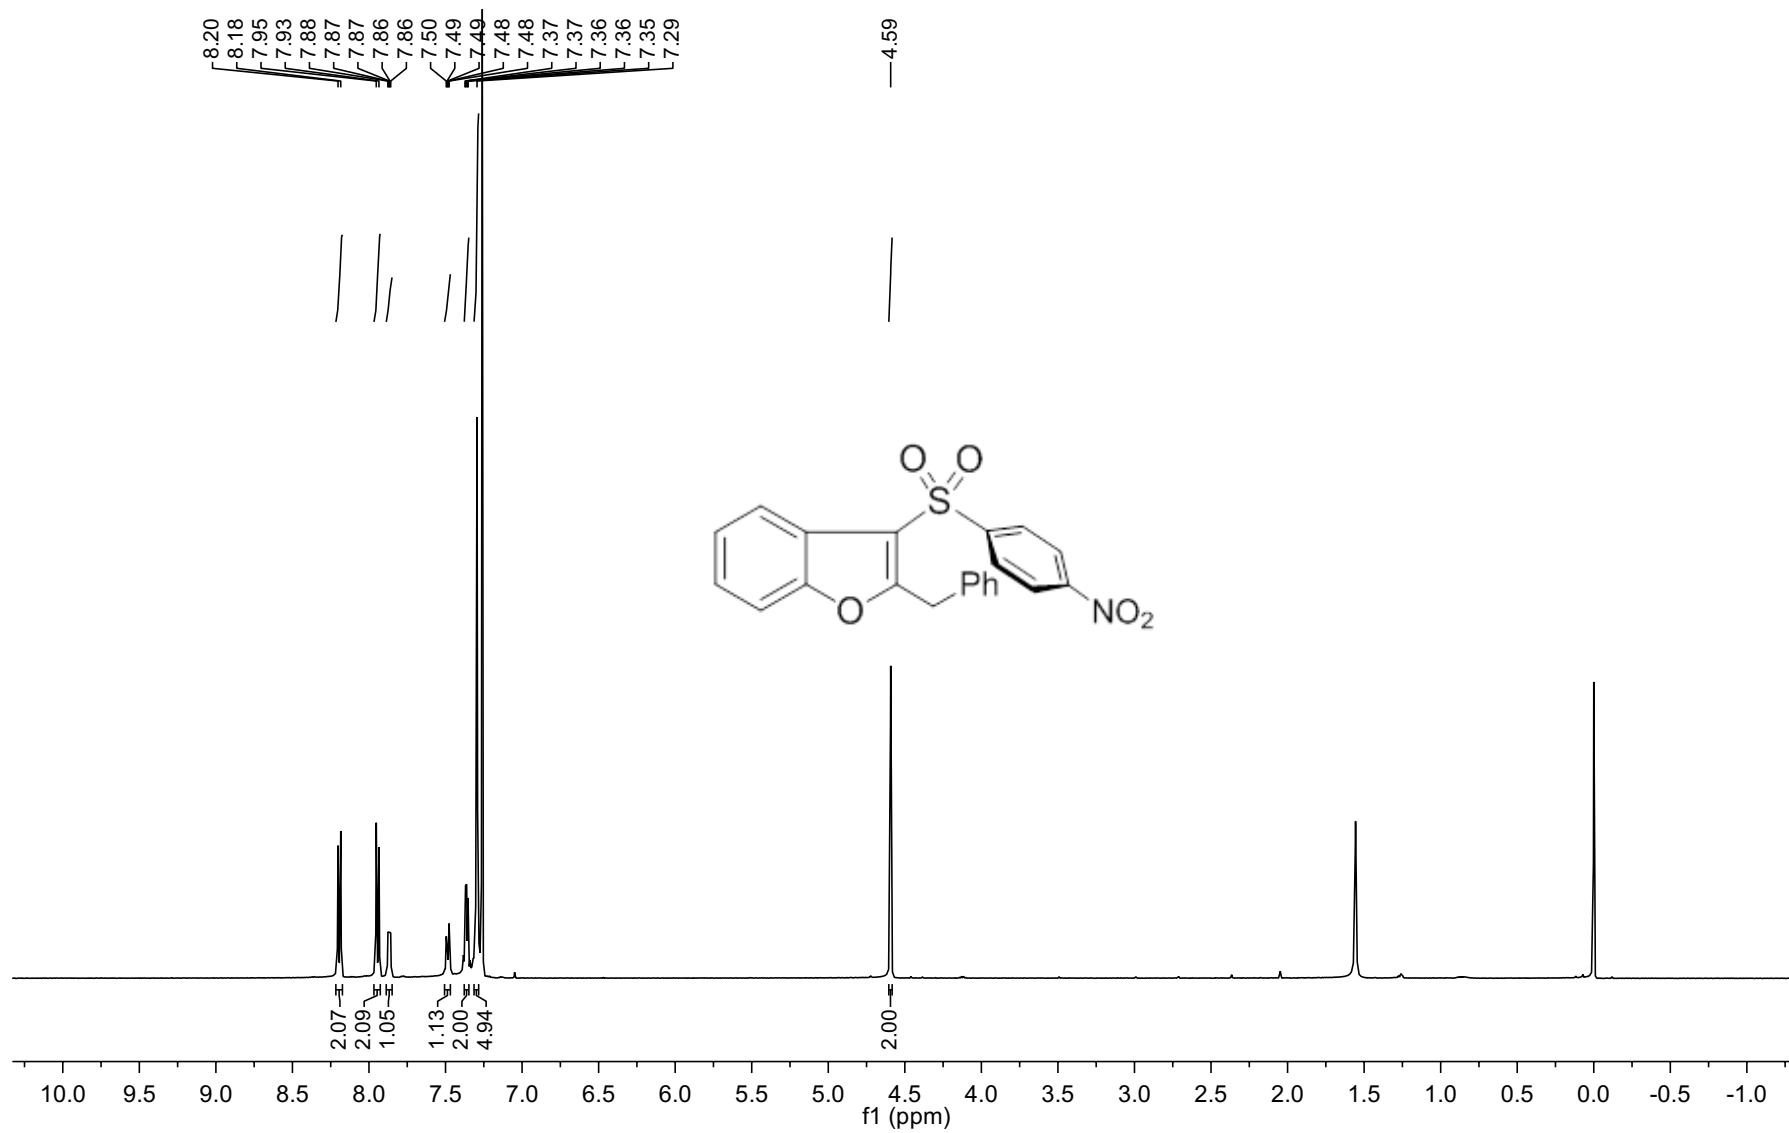

# $^{13}\text{C}$ NMR Spectroscopy of 4aj

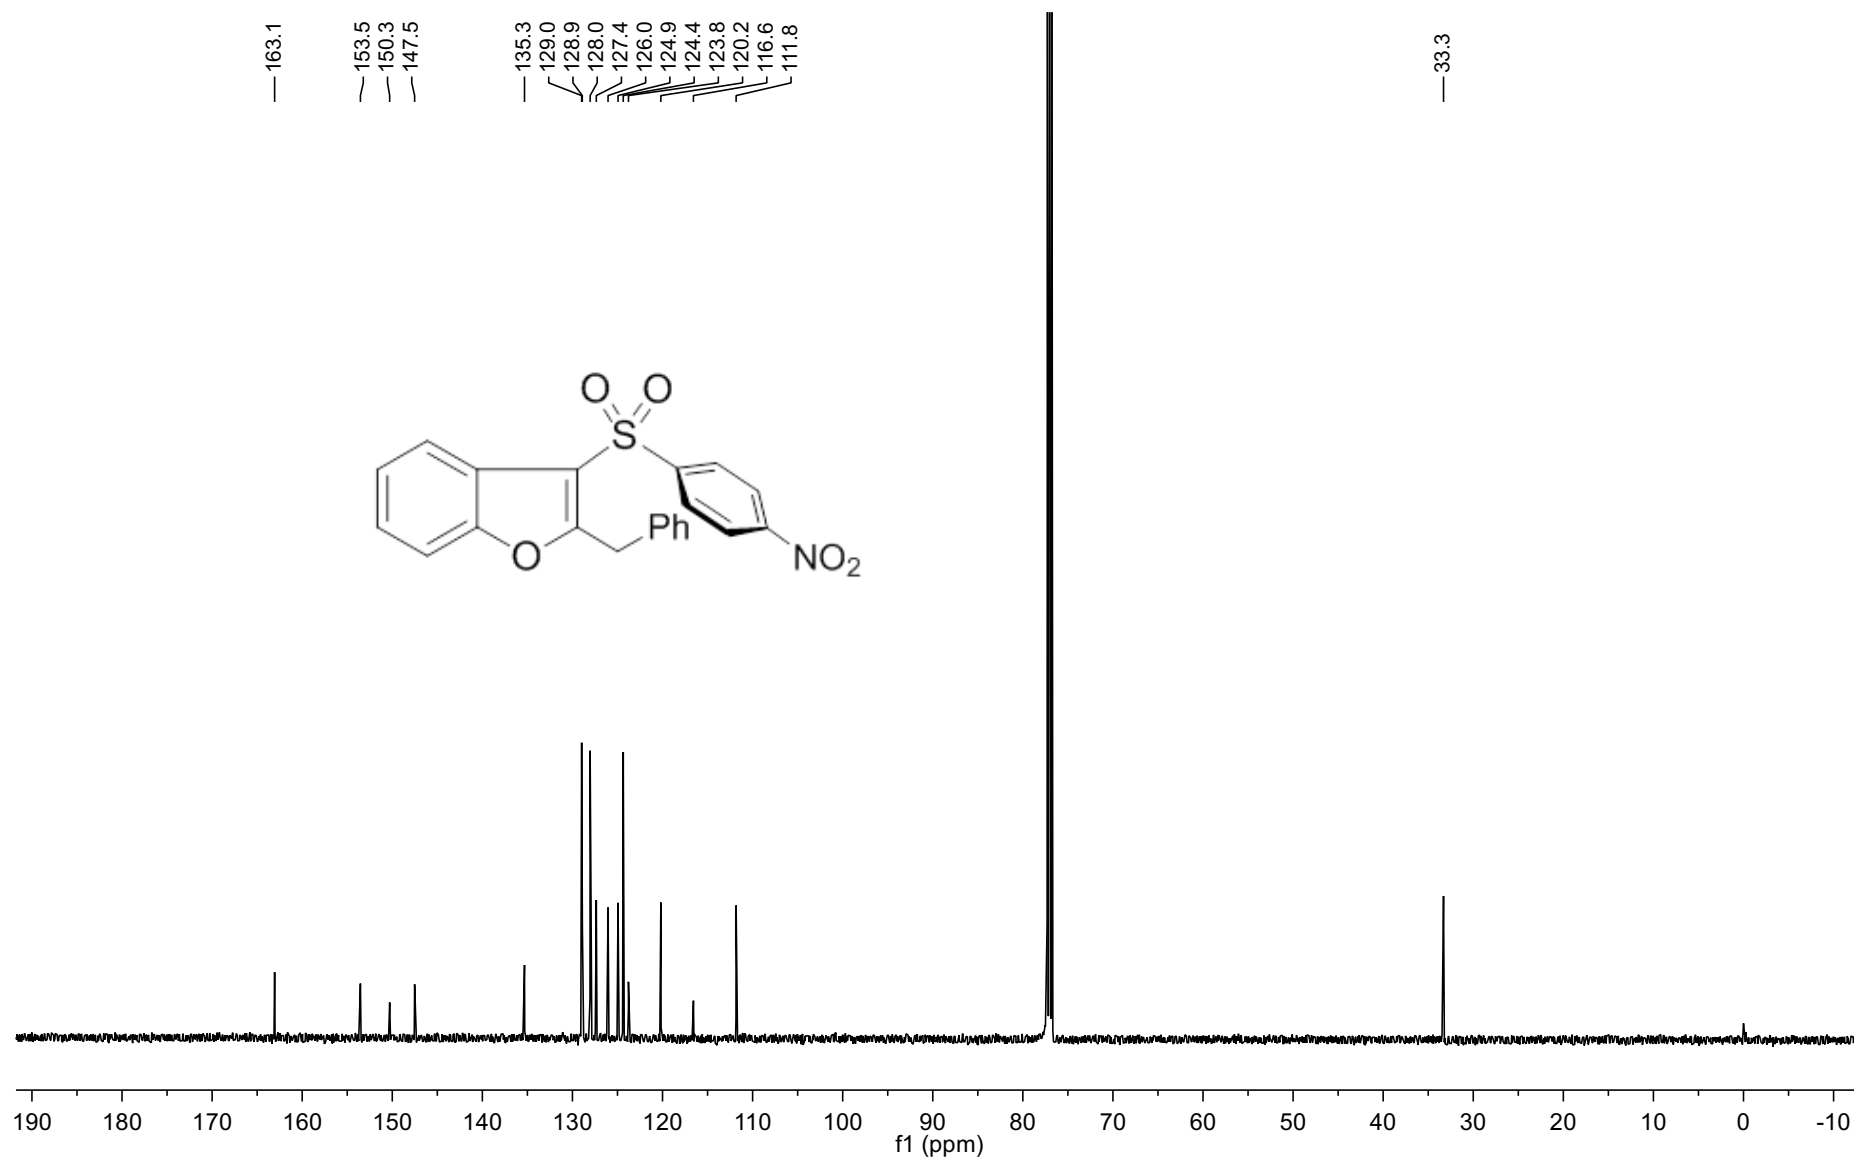

# $^1\text{H}$ NMR Spectroscopy of **5**

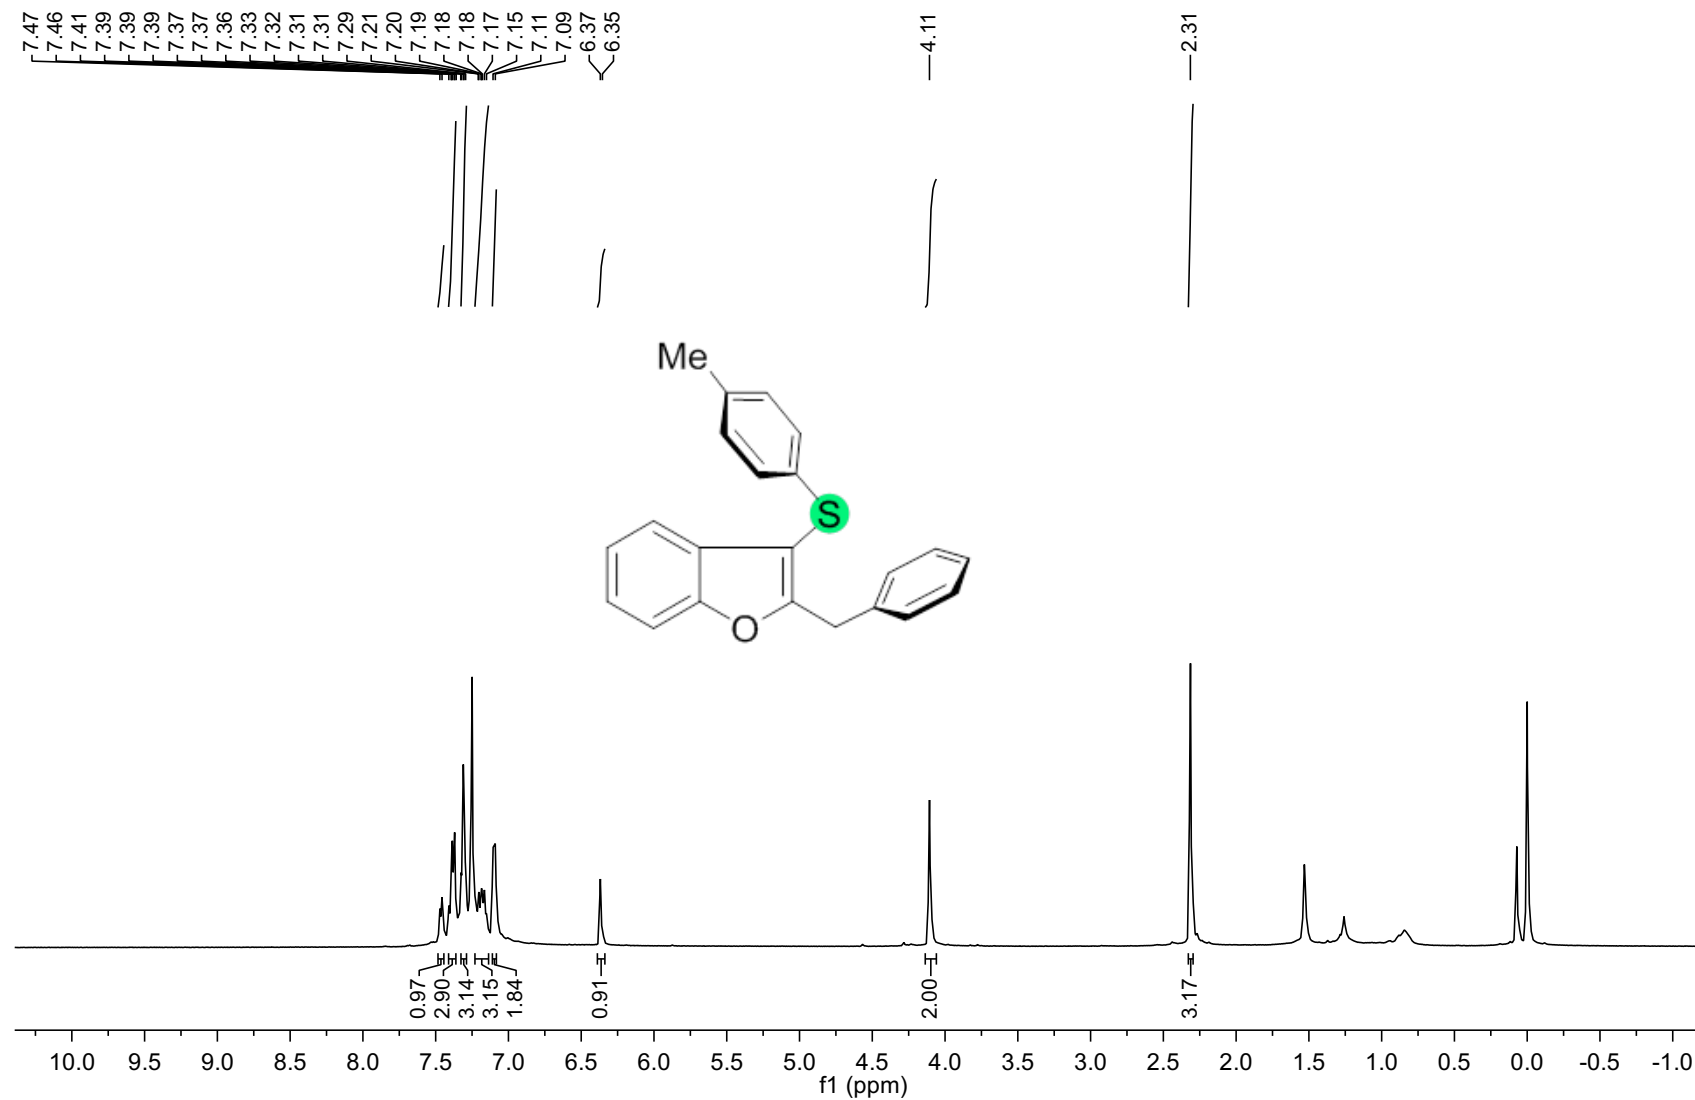

# $^{13}\text{C}$ NMR Spectroscopy of **5**

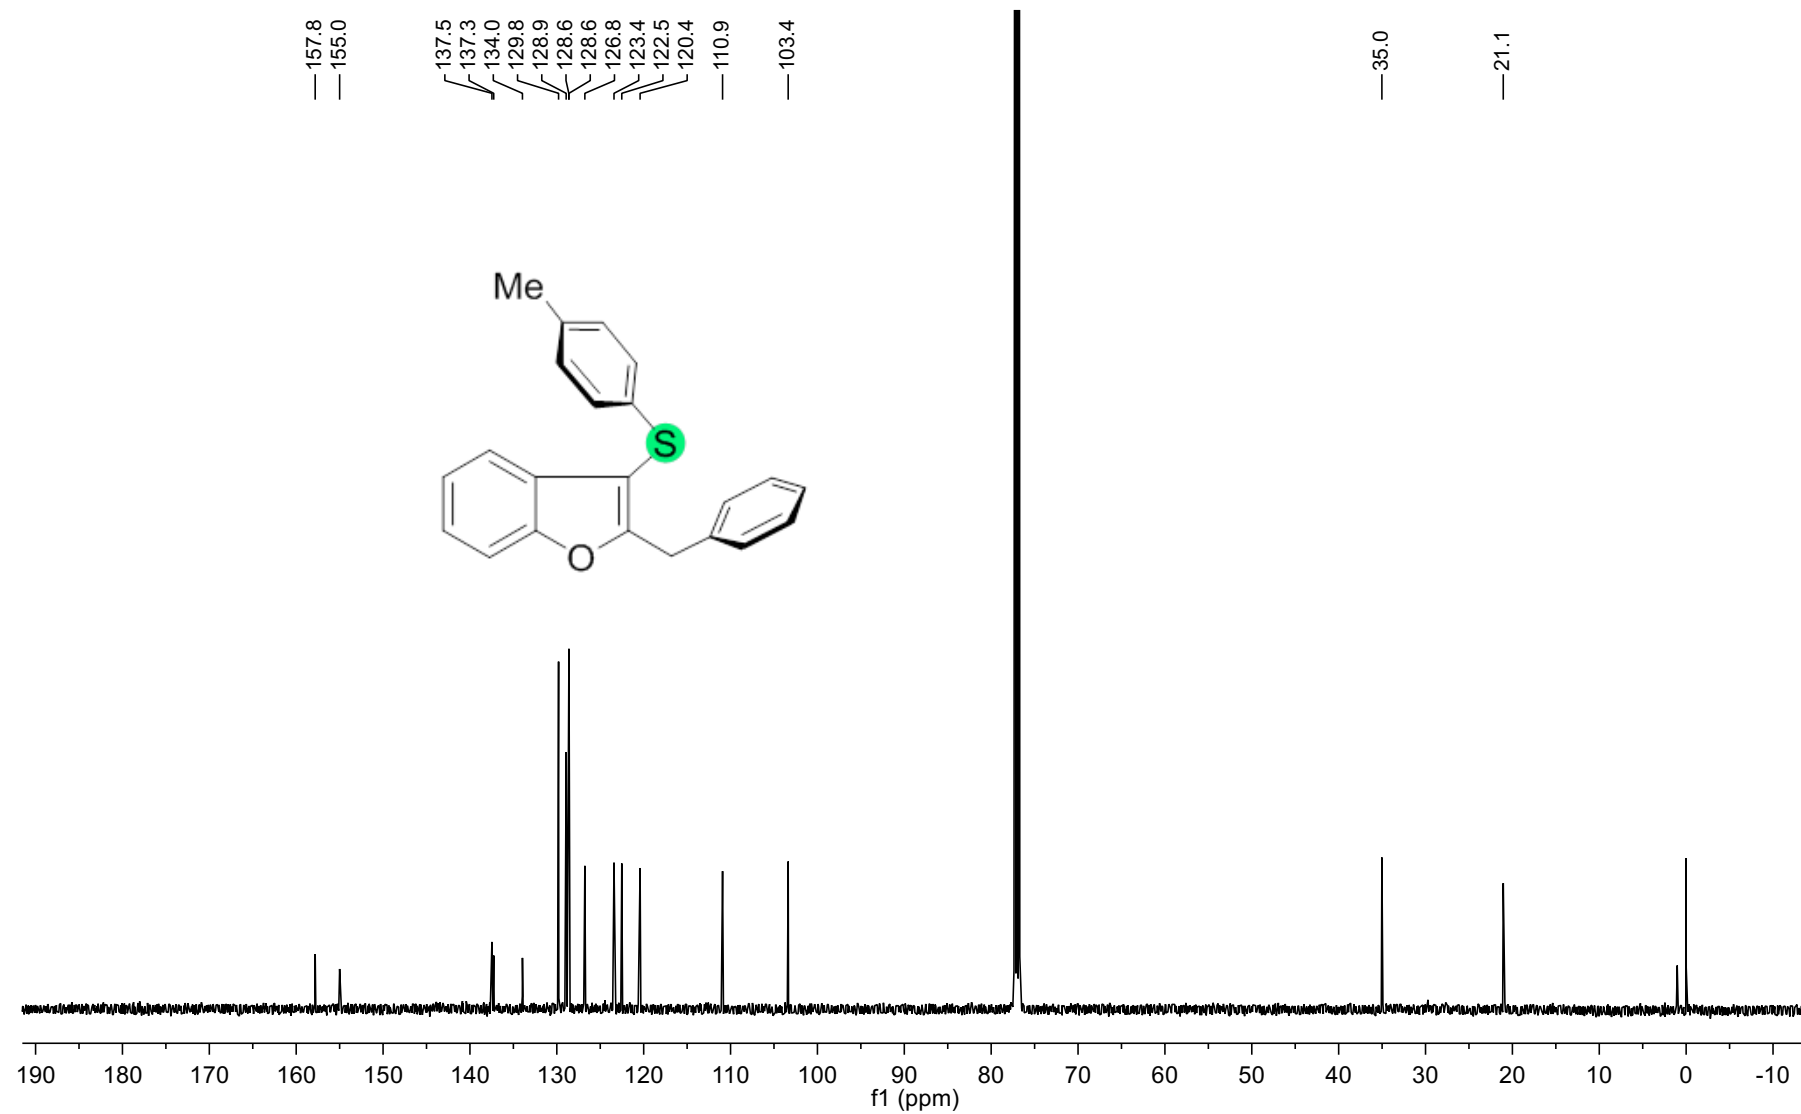



# $^1\text{H}$ NMR Spectroscopy of **6**

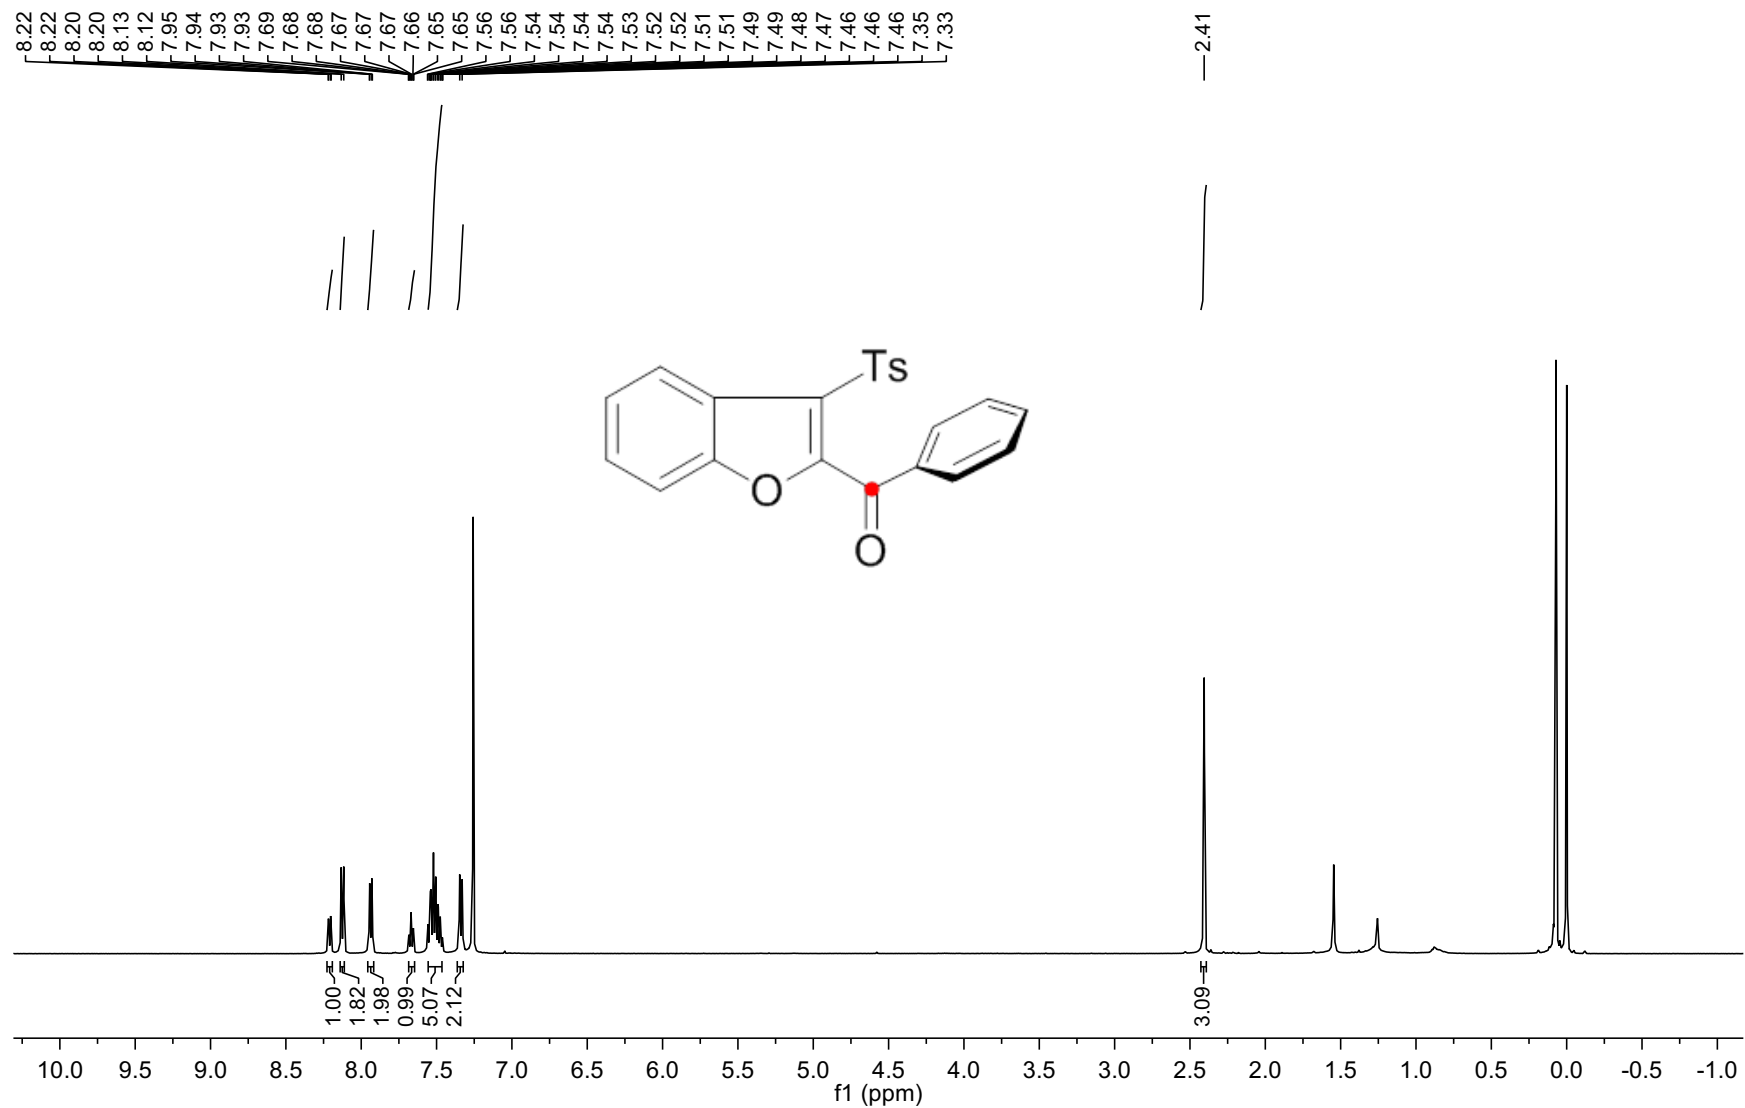

# $^{13}\text{C}$ NMR Spectroscopy of **6**

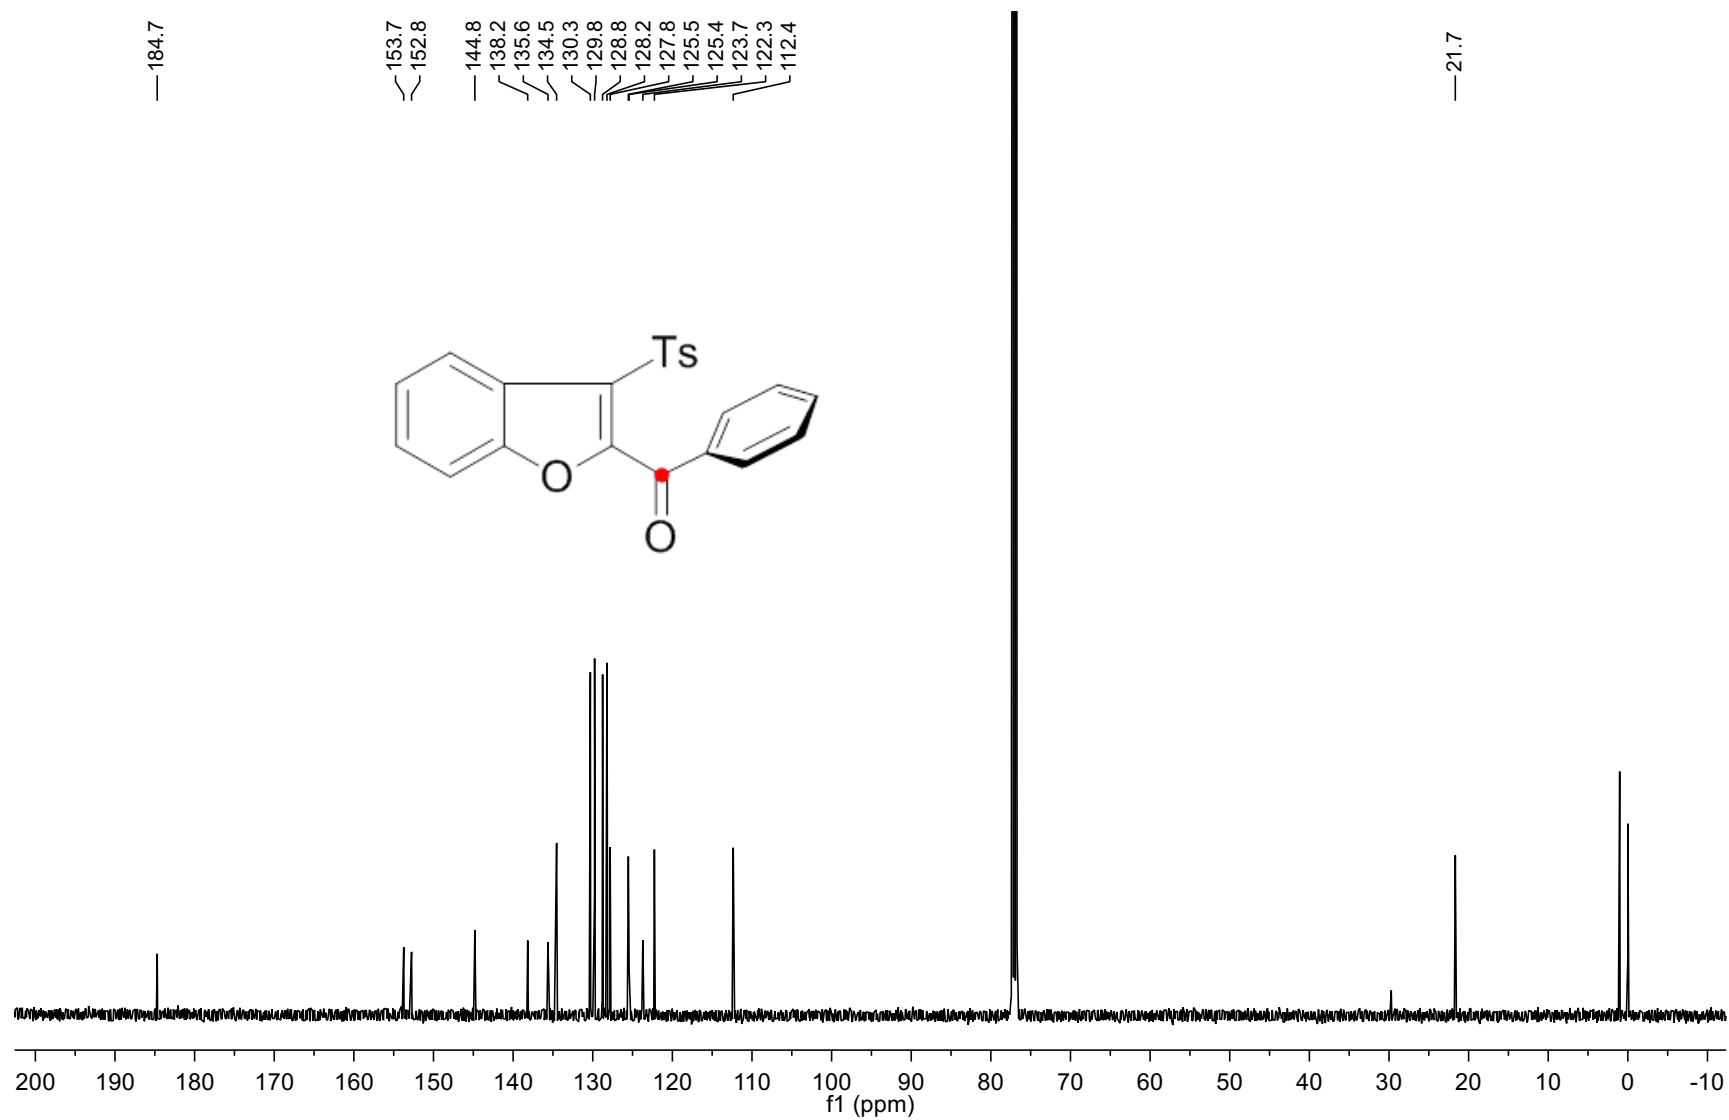

# $^1\text{H}$ NMR Spectroscopy of **7**

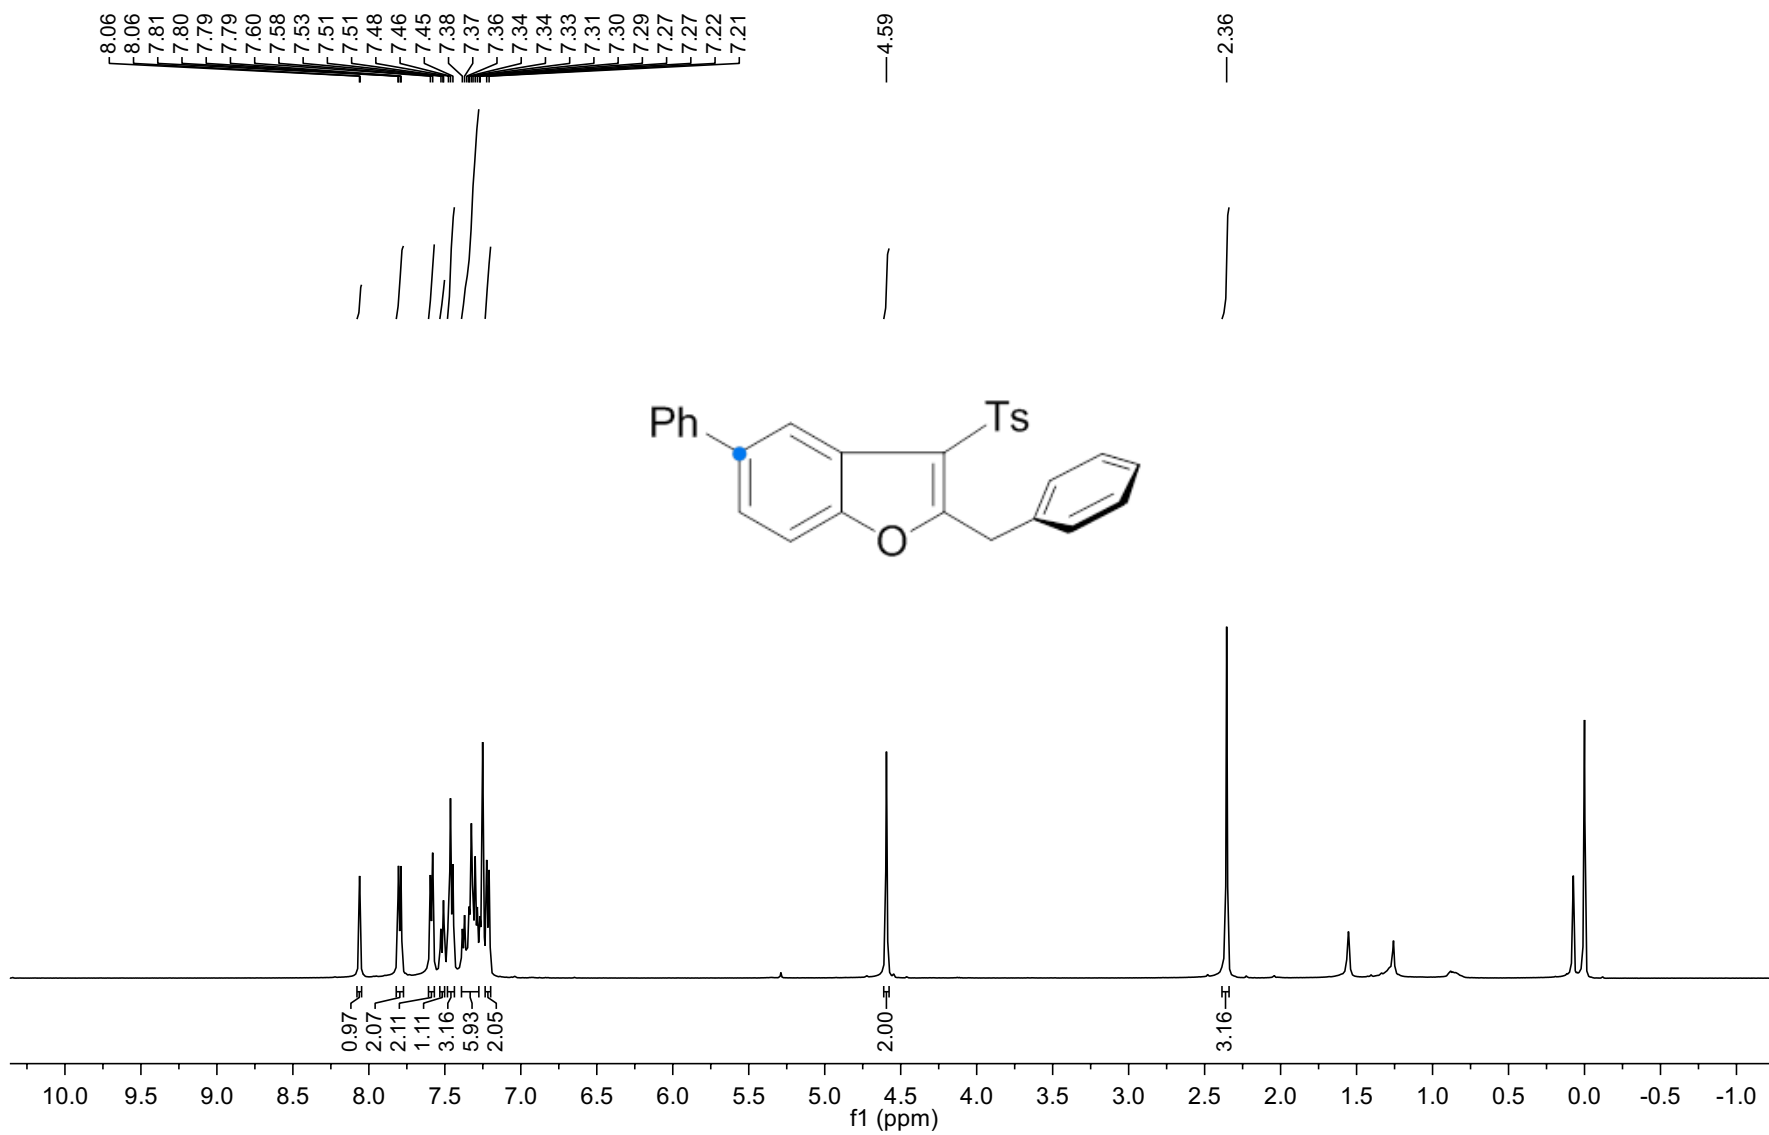

# $^{13}\text{C}$ NMR Spectroscopy of **7**

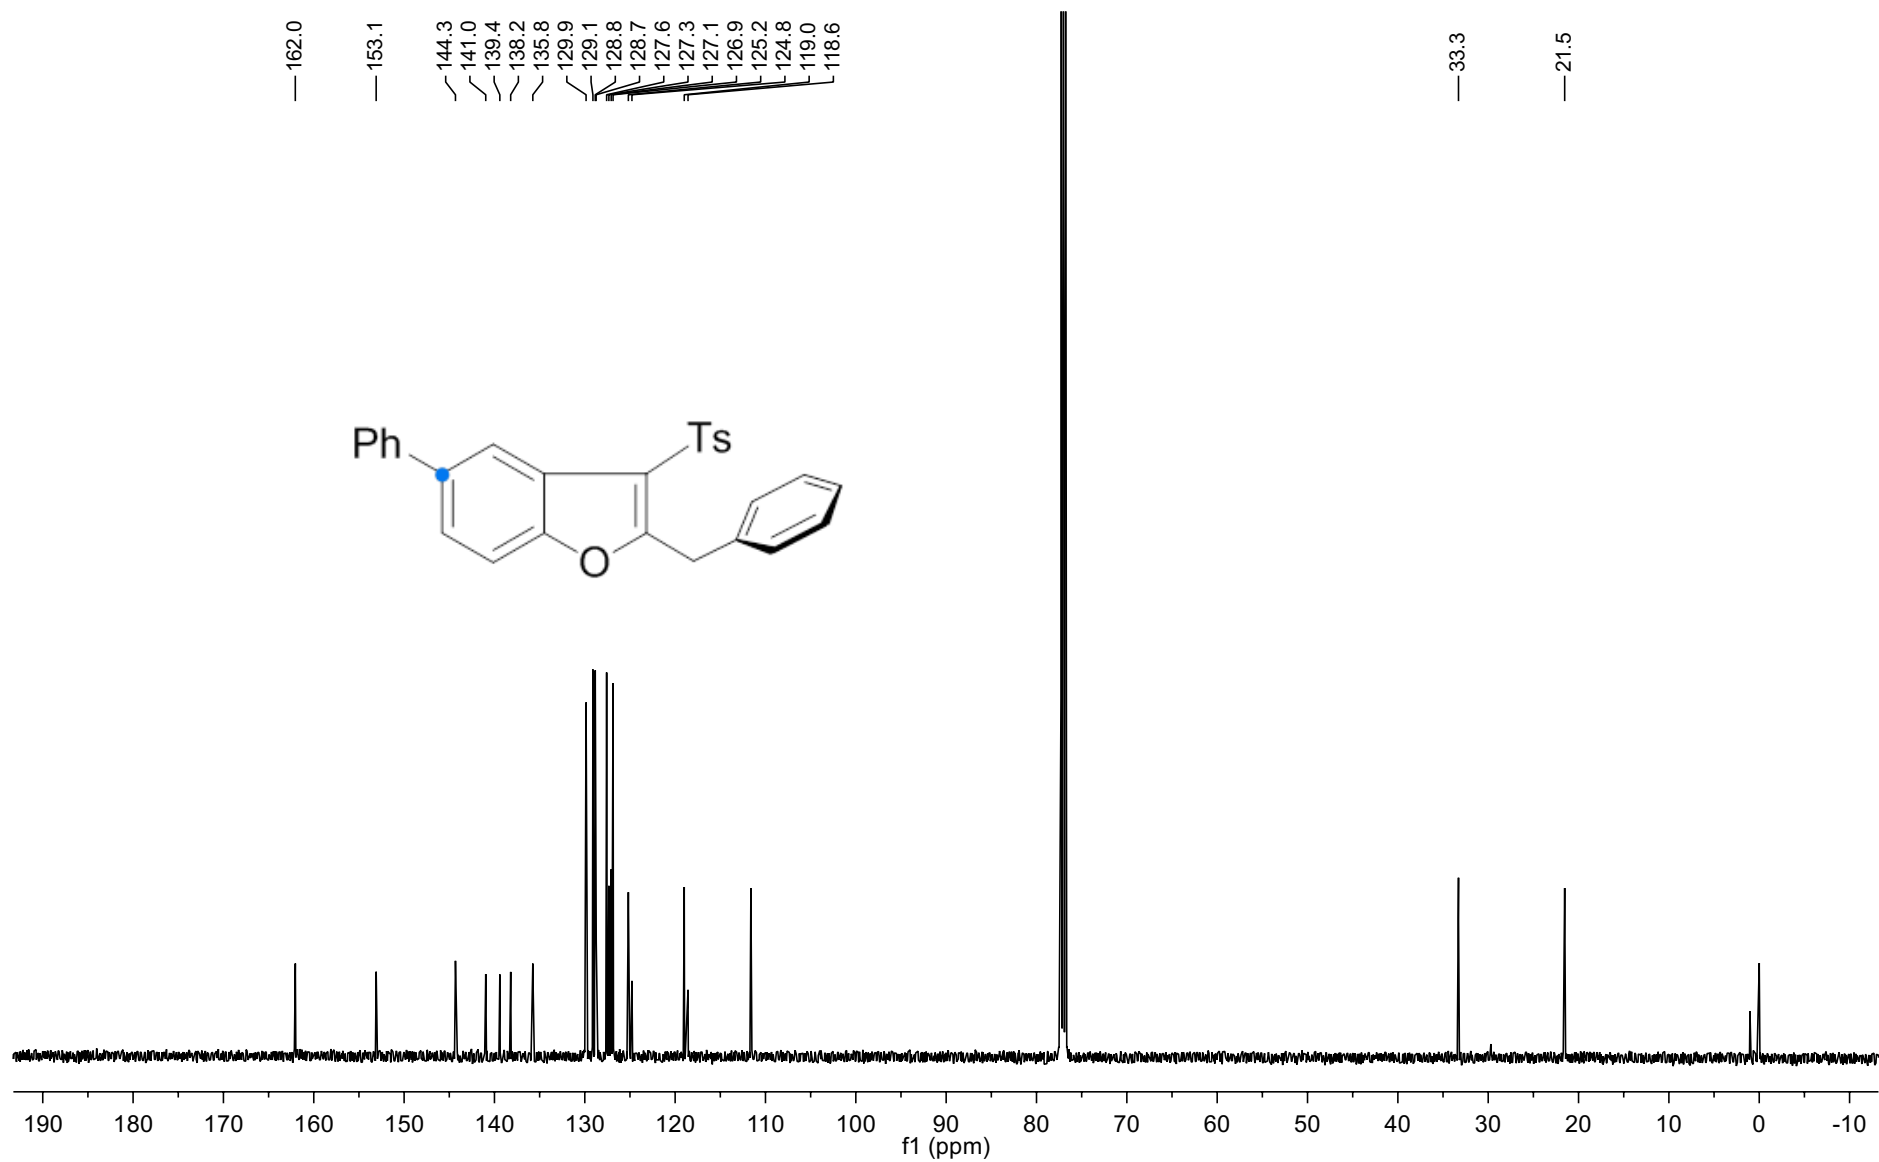

Supplement: c9qo01196j1.pdf [file c9qo01196j1.pdf]
